# Supplementary material for: Integrated Analysis of Transcriptome and Proteome of the Human Cornea and Aqueous Humor Reveal Novel Biomarkers for Corneal Endothelial Cell Dysfunction
Source: MDPI journal article supplement (doi:10.3390/ijms242015354), 2023-10-19
Supplement: s1 [file s1]

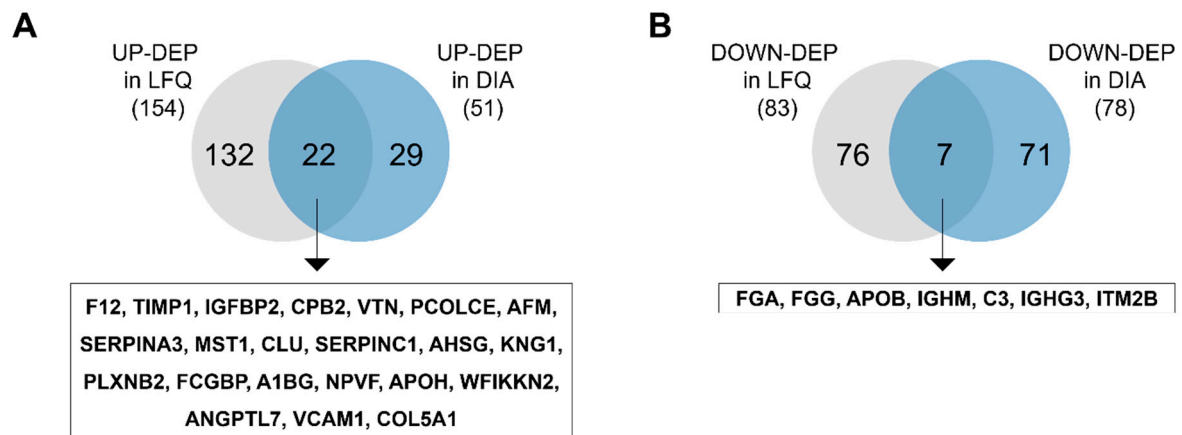

**Figure. S3 Aqueous humor proteome obtained by label-free quantification profiling and data-independent acquisition individual analysis in corneal endothelial cell dysfunction.**

(A, B) The number and list of upregulated and downregulated differentially expressed proteins (DEPs) in aqueous humor with corneal endothelial cell dysfunction, which showed same pattern of differential expression in both label-free quantification (LFQ) profiling and data-independent acquisition (DIA) individual analyses.
