# Supplementary material for: Integrated Analysis of Transcriptome and Proteome of the Human Cornea and Aqueous Humor Reveal Novel Biomarkers for Corneal Endothelial Cell Dysfunction
Source: MDPI journal article supplement (doi:10.3390/ijms242015354), 2023-10-19
Supplement: s1 [file s1]

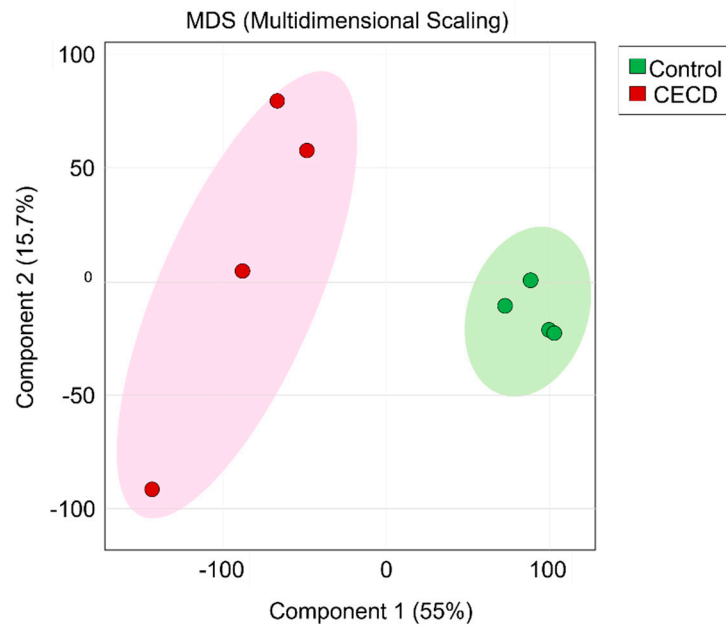

**Figure. S1 Multidimensional scaling analysis of differentially expressed genes in dysfunctional corneal endothelial cells. CECD, corneal endothelial cell dysfunction.**
