# Supplementary material for: Integrated Analysis of Transcriptome and Proteome of the Human Cornea and Aqueous Humor Reveal Novel Biomarkers for Corneal Endothelial Cell Dysfunction
Source: Int J Mol Sci. 2023 Oct 19;24(20):15354. doi: 10.3390/ijms242015354 (PMC10607268; doi:10.3390/ijms242015354)
Supplement: Supplementary file 1 [file ijms-24-15354-s001.zip]

Archive with 8 entries (8 files):
- Fig S1.pdf
- Fig S2.pdf
- Fig S3.pdf
- Table S1.xlsx
- Table S2.xlsx
- Table S3.xlsx
- Table S4.xlsx
- Table S5.xlsx
