# Supplementary material for: Integrated Analysis of Transcriptome and Proteome of the Human Cornea and Aqueous Humor Reveal Novel Biomarkers for Corneal Endothelial Cell Dysfunction
Source: Int J Mol Sci. 2023 Oct 19;24(20):15354. doi: 10.3390/ijms242015354 (PMC10607268; doi:10.3390/ijms242015354)
Supplement: Supplementary file 1 [file ijms-24-15354-s001.zip › Table S1.xlsx]

## Sheet: 1
Table S1. Differentially expressed genes between corneal endothelial cell dysfunction (CECD) and control groups with fold change >2 and p value < 0.05.
Upregulated mRNA in CECD						Downregulated mRNA in CECD
Gene ID	Transcript ID	Gene Symbol	Description	Fold change (CECD/Control)	P value	Gene ID	Transcript ID	Gene Symbol	Description	Fold change (CECD/Control)	P value
6288	NM_000331,NM_001178006,NM_199161	SAA1	serum amyloid A1	835.944	1.03966e-13	126520	NM_001243079	PLK5	polo like kinase 5	-102.132	2.6746e-12
284232	NR_027995	ANKRD20A9P	ankyrin repeat domain 20 family member A9, pseudogene	802.811	1.28587e-18	761	NM_005181	CA3	carbonic anhydrase 3	-61.4633	3.31192e-05
347168	NM_001004451	OR1J1	olfactory receptor family 1 subfamily J member 1	495.092	5.65912e-07	56113	NM_018915,NM_032009	PCDHGA2	protocadherin gamma subfamily A, 2	-50.4207	1.64433e-09
120114	NM_001008781	FAT3	FAT atypical cadherin 3	474.957	1.42495e-17	7111	NM_001166116,NM_003275	TMOD1	tropomodulin 1	-46.5688	1.46451e-09
154664	NM_152701	ABCA13	ATP binding cassette subfamily A member 13	425.804	3.16345e-12	6337	NM_001038,NM_001159575,NM_001159576	SCNN1A	sodium channel epithelial 1 alpha subunit	-43.9801	1.44329e-08
943	NM_001243,NM_001281430	TNFRSF8	tumor necrosis factor receptor superfamily member 8	366.278	3.90829e-14	1288	NM_001287758,NM_001287759,NM_001287760,NM_001847,NM_033641	COL4A6	collagen type IV alpha 6	-41.4673	6.1412e-10
284217	NM_005559	LAMA1	laminin subunit alpha 1	358.48	3.26708e-12	1642	NM_001923	DDB1	damage specific DNA binding protein 1	-31.2905	1.13517e-12
283310	NM_173591	OTOGL	otogelin like	256.127	5.17034e-12	29923	NM_001098786,NM_013332	HILPDA	hypoxia inducible lipid droplet associated	-30.3414	6.74095e-12
55388	NM_018518,NM_182751	MCM10	minichromosome maintenance 10 replication initiation factor	253.685	2.55915e-11	28231	NM_016354	SLCO4A1	solute carrier organic anion transporter family member 4A1	-29.3913	5.0451e-11
6374	NM_002994	CXCL5	C-X-C motif chemokine ligand 5	251.471	7.3638e-05	55544	NM_001291780,NM_017495,NM_183425	RBM38	RNA binding motif protein 38	-29.0374	1.80162e-09
157273	NR_040039	LOC157273	uncharacterized LOC157273	249.856	1.52588e-07	760	NM_000067,NM_001293675	CA2	carbonic anhydrase 2	-27.7408	2.14866e-06
643677	NM_001146197	CCDC168	coiled-coil domain containing 168	248.688	1.05839e-15	5596	NM_001292039,NM_001292040,NM_002747	MAPK4	mitogen-activated protein kinase 4	-27.3437	2.10219e-09
728622	NR_036619	SKP1P2	S-phase kinase-associated protein 1 pseudogene 2	245.683	2.96267e-11	642273	NM_001077710	FAM110C	family with sequence similarity 110 member C	-27.0847	2.40231e-08
4036	NM_004525	LRP2	LDL receptor related protein 2	238.412	1.54246e-13	214	NM_001243280,NM_001243281,NM_001243283,NM_001627	ALCAM	activated leukocyte cell adhesion molecule	-27.0146	1.71762e-10
56938	NM_001248002,NM_001248003,NM_001248004,NM_001248005,NM_020183	ARNTL2	aryl hydrocarbon receptor nuclear translocator like 2	237.452	9.28076e-10	81618	NM_001012514,NM_001012516,NM_001287240,NM_001287241,NM_030926	ITM2C	integral membrane protein 2C	-26.6703	1.06329e-05
58475	NM_021201,NM_206938,NM_206939,NM_206940	MS4A7	membrane spanning 4-domains A7	234.743	9.61286e-12	79683	NM_024630,NM_153746	ZDHHC14	zinc finger DHHC-type containing 14	-26.2854	2.77205e-13
100463482	NM_001190487	MTRNR2L6	MT-RNR2-like 6	231.84	0.000284096	351	NM_000484,NM_001136016,NM_001136129,NM_001136130,NM_001136131,NM_001204301,NM_001204302,NM_001204303,NM_201413,NM_201414	APP	amyloid beta precursor protein	-26.0178	1.60175e-07
55567	NM_017539	DNAH3	dynein axonemal heavy chain 3	231.42	2.36611e-11	1285	NM_000091	COL4A3	collagen type IV alpha 3	-25.9792	7.60582e-12
11185	NM_001199219,NM_006774	INMT	indolethylamine N-methyltransferase	226.048	4.84898e-09	84632	NM_001001936,NM_001287824,NM_032550	AFAP1L2	actin filament associated protein 1 like 2	-25.9124	4.4727e-10
1004	NM_004932	CDH6	cadherin 6	216.044	3.33235e-11	23677	NM_014521	SH3BP4	SH3 domain binding protein 4	-25.6651	3.53524e-07
83889	NM_001291088,NM_031951	WDR87	WD repeat domain 87	215.933	1.5615e-10	3309	NM_005347	HSPA5	heat shock protein family A (Hsp70) member 5	-25.1024	1.10701e-12
255231	NM_153259	MCOLN2	mucolipin 2	211.256	3.21226e-10	6319	NM_005063	SCD	stearoyl-CoA desaturase (delta-9-desaturase)	-24.9028	2.89918e-09
84665	NM_001256267,NM_001256268,NM_032578,NR_045662,NR_045663	MYPN	myopalladin	210.077	7.97321e-09	56104	NM_018922,NM_032095	PCDHGB1	protocadherin gamma subfamily B, 1	-24.6331	2.6423e-06
712	NM_015991	C1QA	complement component 1, q subcomponent, A chain	209.456	8.64618e-07	57326	NM_001317734,NM_001317735,NM_020524	PBXIP1	pre-B-cell leukemia homeobox interacting protein 1	-24.6281	1.63368e-08
114795	NM_001286219,NM_052907	TMEM132B	transmembrane protein 132B	207.547	1.157e-09	54541	NM_019058	DDIT4	DNA damage inducible transcript 4	-23.4986	2.3891e-08
1482	NM_001166175,NM_001166176,NM_004387	NKX2-5	NK2 homeobox 5	202.653	8.50387e-10	6781	NM_003155	STC1	stanniocalcin 1	-22.721	6.69114e-11
155006	NM_001085429	TMEM213	transmembrane protein 213	196.704	4.24903e-07	117	NM_001118,NM_001199635,NM_001199636,NM_001199637	ADCYAP1R1	ADCYAP receptor type I	-22.185	5.18053e-09
83872	NM_031935	HMCN1	hemicentin 1	193.28	1.23345e-12	1287	NM_000495,NM_033380	COL4A5	collagen type IV alpha 5	-21.7616	1.0785e-08
6262	NM_001035	RYR2	ryanodine receptor 2	193.252	5.8985e-10	26027	NM_015547,NM_147161	ACOT11	acyl-CoA thioesterase 11	-20.7921	7.18874e-06
100132594	NR_077225	PGAM1P5	phosphoglycerate mutase 1 pseudogene 5	184.083	9.51149e-07	23024	NM_001303139,NM_001303140,NM_001303141,NM_001303142,NM_015009	PDZRN3	PDZ domain containing ring finger 3	-20.6791	1.33336e-11
653361	NM_000265	NCF1	neutrophil cytosolic factor 1	177.431	3.79322e-08	771	NM_001218,NM_001293642,NM_206925,NR_135511	CA12	carbonic anhydrase 12	-20.2886	1.50503e-08
2099	NM_000125,NM_001122740,NM_001122741,NM_001122742,NM_001291230,NM_001291241	ESR1	estrogen receptor 1	175.752	1.53662e-12	64850	NM_001146590,NM_001146627,NM_031279,NR_027474,NR_027475	ETNPPL	ethanolamine-phosphate phospho-lyase	-19.9807	4.94907e-06
23316	NM_015267	CUX2	cut like homeobox 2	161.325	4.17891e-13	6389	NM_001294332,NM_004168	SDHA	succinate dehydrogenase complex flavoprotein subunit A	-19.7888	4.99704e-11
729574	NM_001282321	FAM231A	family with sequence similarity 231 member A	160.515	4.2433e-11	84960	NM_001039374	CCDC183	coiled-coil domain containing 183	-19.7691	3.01059e-07
101929163	NR_136244,NR_136245,NR_136246	LOC101929163	uncharacterized LOC101929163	158.363	1.03137e-09	112399	NM_001308103,NM_022073	EGLN3	egl-9 family hypoxia inducible factor 3	-19.7051	1.36891e-07
952	NM_001775,NR_132660	CD38	CD38 molecule	152.541	1.81032e-09	56099	NM_018927,NM_032101	PCDHGB7	protocadherin gamma subfamily B, 7	-19.6351	0.000151184
644936	NR_004845	LOC644936	actin, beta pseudogene	151.981	4.88328e-10	5797	NM_001105244,NM_002845	PTPRM	protein tyrosine phosphatase, receptor type M	-19.3457	1.259e-09
126669	NM_001010846,NR_135169	SHE	Src homology 2 domain containing E	151.269	4.24059e-09	101927075	NR_108034	FGF10-AS1	FGF10 antisense RNA 1	-18.6072	3.73386e-08
284085	NR_028334	KRT18P55	keratin 18 pseudogene 55	148.997	5.88993e-09	6513	NM_006516	SLC2A1	solute carrier family 2 member 1	-18.189	2.3767e-09
4069	NM_000239	LYZ	lysozyme	146.545	1.10583e-06	138046	NM_001100391,NM_001100392,NM_001100393,NM_001287243,NM_001287244,NM_173848	RALYL	RALY RNA binding protein-like	-18.0017	9.22698e-09
130013	NM_001307983,NM_138326	ACMSD	aminocarboxymuconate semialdehyde decarboxylase	146.457	2.51952e-08	123099	NM_206918	DEGS2	delta(4)-desaturase, sphingolipid 2	-17.9316	1.5672e-06
170575	NM_130759	GIMAP1	GTPase, IMAP family member 1	145.649	4.37951e-13	9829	NM_001256864,NM_001256865,NM_014787	DNAJC6	DnaJ heat shock protein family (Hsp40) member C6	-17.6179	1.37406e-05
1088	NM_001816	CEACAM8	carcinoembryonic antigen related cell adhesion molecule 8	145.419	3.95329e-09	9762	NM_001282533	LZTS3	leucine zipper, putative tumor suppressor family member 3	-17.3663	2.34868e-07
140803	NM_001177310,NM_001177311,NM_017662	TRPM6	transient receptor potential cation channel subfamily M member 6	145.041	5.67615e-11	56934	NM_001082533,NM_001082534,NM_020178	CA10	carbonic anhydrase 10	-17.0624	3.54105e-06
326342	NR_024075	ADGRE4P	adhesion G protein-coupled receptor E4, pseudogene	144.082	4.66716e-10	476	NM_000701,NM_001160233,NM_001160234	ATP1A1	ATPase Na+/K+ transporting subunit alpha 1	-16.7291	1.43943e-10
64231	NM_001247999,NM_022349,NM_152851,NM_152852	MS4A6A	membrane spanning 4-domains A6A	143.949	3.61142e-08	780	NM_001202521,NM_001202522,NM_001202523,NM_001297652,NM_001297653,NM_001297654,NM_001954,NM_013993,NM_013994	DDR1	discoidin domain receptor tyrosine kinase 1	-16.6848	4.52758e-06
7455	NM_003386,NM_173059,NR_111917,NR_111918,NR_111919	ZAN	zonadhesin (gene/pseudogene)	143.362	4.01923e-08	9600	NM_001130848,NM_004910	PITPNM1	phosphatidylinositol transfer protein membrane associated 1	-16.5885	4.34844e-07
4242	NM_001166343,NM_002405,NR_029413	MFNG	MFNG O-fucosylpeptide 3-beta-N-acetylglucosaminyltransferase	138.788	6.07452e-06	53832	NM_001278722,NM_001278723,NM_001278724,NM_014432	IL20RA	interleukin 20 receptor subunit alpha	-16.3885	7.54437e-09
286083	NR_111948	LOC286083	uncharacterized LOC286083	138.332	7.44747e-11	54749	NM_001242946,NM_001242948,NM_017549	EPDR1	ependymin related 1	-16.1202	2.86022e-07
4318	NM_004994	MMP9	matrix metallopeptidase 9	137.516	1.78775e-06	57662	NM_001080429,NM_020902	CAMSAP3	calmodulin regulated spectrin associated protein family member 3	-16.0973	1.77593e-06
57167	NM_001318031,NM_020436	SALL4	spalt-like transcription factor 4	137.015	5.72427e-11	22844	NM_014907	FRMPD1	FERM and PDZ domain containing 1	-15.9651	6.50212e-07
125336	NM_001145472,NM_001145473,NM_001173129,NM_001308013,NM_144612	LOXHD1	lipoxygenase homology domains 1	135.267	5.16247e-10	2026	NM_001975	ENO2	enolase 2	-15.8235	1.41141e-08
5858	NM_002864	PZP	pregnancy-zone protein	135.254	4.1497e-08	8938	NM_001199096,NM_001199097,NM_001199098,NM_001199099,NM_001286464,NM_003933	BAIAP3	BAI1 associated protein 3	-15.6	2.71106e-07
63967	NM_001190481,NM_022111	CLSPN	claspin	133.924	5.97996e-12	28951	NM_021643,NR_027303	TRIB2	tribbles pseudokinase 2	-15.4358	1.74854e-08
11141	NM_014271	IL1RAPL1	interleukin 1 receptor accessory protein like 1	133.538	4.29845e-06	79625	NM_024574	NDNF	neuron-derived neurotrophic factor	-15.3773	1.36841e-08
389432	NM_001030060	SAMD5	sterile alpha motif domain containing 5	131.786	1.84929e-08	51430	NM_001282750,NM_001282751,NM_014283,NM_016227	SUCO	SUN domain containing ossification factor	-15.2445	1.05455e-09
2916	NM_000843	GRM6	glutamate metabotropic receptor 6	129.3	2.5183e-07	4653	NM_000261	MYOC	myocilin	-15.2196	2.88201e-07
9752	NM_014005,NM_031857	PCDHA9	protocadherin alpha 9	125.848	5.16513e-07	64072	NM_001171930,NM_001171931,NM_001171932,NM_001171933,NM_001171934,NM_001171935,NM_001171936,NM_022124,NM_052836	CDH23	cadherin-related 23	-15.1526	3.1461e-07
100846978	NR_047469,NR_104153	LINC00506	long intergenic non-protein coding RNA 506	123.608	1.14332e-05	6508	NM_005070,NM_201574,NR_048551	SLC4A3	solute carrier family 4 member 3	-14.8945	3.57731e-07
10819	NR_045002	OR7E14P	olfactory receptor family 7 subfamily E member 14 pseudogene	121.862	4.32205e-06	60529	NM_021926	ALX4	ALX homeobox 4	-14.6953	1.16966e-06
127670	NM_172000	TEDDM1	transmembrane epididymal protein 1	121.493	8.74886e-11	55118	NM_001206528,NM_018058	CRTAC1	cartilage acidic protein 1	-14.5764	0.00179505
3274	NM_001131055,NM_022304	HRH2	histamine receptor H2	121.108	4.28713e-08	7681	NM_005664	MKRN3	makorin ring finger protein 3	-14.5068	0.000437814
100287404	NM_001256860	USP17L19	ubiquitin specific peptidase 17-like family member 19	121.105	1.05191e-12	57124	NM_020404	CD248	CD248 molecule	-14.5049	0.00021651
10821	NR_044999	OR7E12P	olfactory receptor family 7 subfamily E member 12 pseudogene	120.917	2.04392e-06	84895	NM_032809	FAM73B	family with sequence similarity 73 member B	-14.1927	5.68846e-07
146909	NM_001264573,NM_001265577	KIF18B	kinesin family member 18B	120.002	8.12399e-09	5214	NM_001242339,NM_001323067,NM_001323068,NM_001323069,NM_001323070,NM_001323071,NM_001323072,NM_001323073,NM_001323074,NM_002627	PFKP	phosphofructokinase, platelet	-14.1049	1.23322e-08
3429	NM_001288954,NM_001288957,NM_001288958,NM_001288960,NM_001288995,NM_005532	IFI27	interferon alpha inducible protein 27	119.962	1.50248e-17	2101	NM_001282450,NM_001282451,NM_004451	ESRRA	estrogen related receptor alpha	-13.9232	4.53314e-10
2214	NM_000569,NM_001127592,NM_001127593,NM_001127595,NM_001127596	FCGR3A	Fc fragment of IgG receptor IIIa	117.389	1.45626e-06	10418	NM_006108	SPON1	spondin 1	-13.9001	4.05115e-05
285335	NM_001320531,NM_183061,NR_135297	SLC9C1	solute carrier family 9 member C1	114.799	1.91979e-10	79007	NM_001042610,NM_001288708,NM_001288709,NM_024043	DBNDD1	dysbindin (dystrobrevin binding protein 1) domain containing 1	-13.8698	1.74043e-07
4212	NM_001220482,NM_002399,NM_170674,NM_170675,NM_170676,NM_170677,NM_172315,NM_172316,NR_051953	MEIS2	Meis homeobox 2	112.775	1.52098e-10	3164	NM_001202233,NM_001202234,NM_002135,NM_173157	NR4A1	nuclear receptor subfamily 4 group A member 1	-13.7775	0.000923263
284992	NM_001080539	CCDC150	coiled-coil domain containing 150	111.803	8.32283e-09	27151	NM_015692	CPAMD8	C3 and PZP like, alpha-2-macroglobulin domain containing 8	-13.6824	2.86634e-09
25859	NR_024617,NR_028508,NR_028509	PART1	prostate androgen-regulated transcript 1 (non-protein coding)	110.778	3.09091e-08	6575	NM_001257180,NM_001257181,NM_006749	SLC20A2	solute carrier family 20 member 2	-13.6018	4.1355e-08
440482	NR_040113	ANKRD20A5P	ankyrin repeat domain 20 family member A5, pseudogene	109.547	3.51186e-09	6422	NM_003012	SFRP1	secreted frizzled-related protein 1	-13.5685	0.000404768
79856	NM_024798,NR_073534	SNX22	sorting nexin 22	109.26	2.77685e-08	148479	NM_153812	PHF13	PHD finger protein 13	-13.5564	2.15637e-09
100288527	NR_003594	REXO1L2P	REX1, RNA exonuclease 1 homolog-like 2, pseudogene	109.026	3.77118e-08	6097	NM_001001523,NM_005060	RORC	RAR related orphan receptor C	-13.5281	3.07579e-07
266697	NR_024592	POM121L4P	POM121 transmembrane nucleoporin like 4, pseudogene	107.028	2.88484e-09	51196	NM_001165979,NM_001288989,NM_016341	PLCE1	phospholipase C epsilon 1	-13.5215	2.49121e-08
100287178	NM_001256854	USP17L11	ubiquitin specific peptidase 17-like family member 11	106.975	1.45336e-10	79971	NM_001002292,NM_001193334,NM_024911	WLS	wntless Wnt ligand secretion mediator	-13.2926	5.91028e-07
7399	NM_007123,NM_206933	USH2A	Usher syndrome 2A (autosomal recessive, mild)	105.44	8.15919e-11	2030	NM_001078175,NM_001078177,NM_001304462,NM_001304463,NM_001304465,NM_001304466	SLC29A1	solute carrier family 29 member 1 (Augustine blood group)	-13.2805	5.6906e-05
4689	NM_000631,NM_013416	NCF4	neutrophil cytosolic factor 4	105.404	1.31767e-07	7049	NM_001195683,NM_001195684,NM_003243,NR_036634	TGFBR3	transforming growth factor beta receptor 3	-13.2417	1.41422e-06
22798	NM_001318046,NM_001318047,NM_001318048,NM_007356	LAMB4	laminin subunit beta 4	104.78	2.17875e-10	1718	NM_014762	DHCR24	24-dehydrocholesterol reductase	-13.1361	9.48926e-08
11095	NM_007037	ADAMTS8	ADAM metallopeptidase with thrombospondin type 1 motif 8	101.289	7.50269e-07	57730	NM_025190	ANKRD36B	ankyrin repeat domain 36B	-12.9785	8.65315e-09
64174	NM_001324159,NM_022355,NR_136706	DPEP2	dipeptidase 2	101.207	9.37546e-09	2252	NM_002009	FGF7	fibroblast growth factor 7	-12.8058	0.000389696
7652	NM_001080409	ZNF99	zinc finger protein 99	100.748	6.9119e-08	10140	NM_001243877,NM_001243885,NM_005749	TOB1	transducer of ERBB2, 1	-12.6059	1.3917e-05
6039	NM_005615	RNASE6	ribonuclease A family member k6	100.68	2.77784e-08	348254	NR_023380	CCDC144CP	coiled-coil domain containing 144C, pseudogene	-12.5674	1.67089e-07
100287144	NM_001256852	USP17L10	ubiquitin specific peptidase 17-like family member 10	100.189	3.5701e-09	4628	NM_001256012,NM_001256095,NM_005964	MYH10	myosin, heavy chain 10, non-muscle	-12.5475	1.44224e-09
100287205	NM_001256853	USP17L12	ubiquitin specific peptidase 17-like family member 12	99.9761	1.55392e-10	55966	NM_001042478,NM_018836	AJAP1	adherens junctions associated protein 1	-12.4905	1.54035e-07
597	NM_001114735,NM_004049	BCL2A1	BCL2 related protein A1	99.4506	2.13534e-07	7767	NM_001321645,NM_013398	ZNF224	zinc finger protein 224	-12.4159	1.30234e-05
29774	NR_003714	POM121L9P	POM121 transmembrane nucleoporin like 9, pseudogene	99.2835	7.80293e-10	26119	NM_015627	LDLRAP1	low density lipoprotein receptor adaptor protein 1	-12.409	3.92381e-06
8792	NM_001270949,NM_001270950,NM_001270951,NM_001278268,NM_003839	TNFRSF11A	tumor necrosis factor receptor superfamily member 11a	99.2693	4.6744e-11	1908	NM_001302455,NM_001302456,NM_207032,NM_207033,NM_207034	EDN3	endothelin 3	-12.3055	2.03204e-05
1441	NM_000760,NM_156039,NM_172313	CSF3R	colony stimulating factor 3 receptor	99.0225	6.251e-07	8395	NM_001278253,NM_003558	PIP5K1B	phosphatidylinositol-4-phosphate 5-kinase type 1 beta	-12.2502	2.2688e-07
392307	NM_001012446,NR_052026	FAM221B	family with sequence similarity 221 member B	96.1838	1.61056e-06	2064	NM_001005862,NM_001289936,NM_001289937,NM_001289938,NM_004448,NR_110535	ERBB2	erb-b2 receptor tyrosine kinase 2	-12.2165	9.17032e-09
102724077	NR_126355	LINC01389	long intergenic non-protein coding RNA 1389	95.3233	5.01637e-06	23353	NM_001130965,NM_001171944,NM_001171945,NM_001171946,NM_025154	SUN1	Sad1 and UNC84 domain containing 1	-12.1653	4.15363e-05
8832	NM_001184879,NM_001184881,NM_001184882,NM_003874	CD84	CD84 molecule	95.0045	7.14124e-12	23127	NM_001303420,NM_001303421,NM_015101	COLGALT2	collagen beta(1-O)galactosyltransferase 2	-11.8191	3.51646e-06
26577	NM_013363	PCOLCE2	procollagen C-endopeptidase enhancer 2	94.4725	0.000208947	43	NM_000665,NM_001282449,NM_001302621,NM_001302622,NM_015831	ACHE	acetylcholinesterase (Cartwright blood group)	-11.6967	3.14232e-06
241	NM_001204406,NM_001629	ALOX5AP	arachidonate 5-lipoxygenase activating protein	93.8725	8.10513e-07	768	NM_001216	CA9	carbonic anhydrase 9	-11.5151	4.01721e-05
100129424	NR_026660	RPL19P12	ribosomal protein L19 pseudogene 12	93.6492	1.45379e-05	84679	NM_001257291,NM_032591	SLC9A7	solute carrier family 9 member A7	-11.4887	1.45097e-08
57538	NM_020778	ALPK3	alpha kinase 3	92.9086	3.31305e-11	57449	NM_001042663,NM_001042664,NM_001042665,NM_001265592,NM_001265593,NM_001265594,NM_020631,NM_198681	PLEKHG5	pleckstrin homology and RhoGEF domain containing G5	-11.4437	1.19439e-07
388499	NR_033250	LYPLA2P2	lysophospholipase II pseudogene 2	90.9755	1.92269e-10	94121	NM_001129896,NM_001174068,NM_080737	SYTL4	synaptotagmin like 4	-11.4405	0.000102389
388325	NM_001271842,NM_001319190,NM_207103	SCIMP	SLP adaptor and CSK interacting membrane protein	90.0606	1.41649e-11	10144	NM_001015045,NM_001265578,NM_001265579,NM_001265580,NM_014883	FAM13A	family with sequence similarity 13 member A	-11.4131	1.51919e-07
8288	NM_000502	EPX	eosinophil peroxidase	89.5401	1.39237e-08	9415	NM_001281501,NM_001281502,NM_004265	FADS2	fatty acid desaturase 2	-11.4094	7.63986e-06
285386	NM_198485	TPRG1	tumor protein p63 regulated 1	89.1251	2.24535e-07	3912	NM_002291	LAMB1	laminin subunit beta 1	-11.3786	6.10217e-06
84627	NM_001127464	ZNF469	zinc finger protein 469	88.7432	2.86244e-06	6843	NM_001297438,NM_014231,NM_016830,NM_199245,NR_123717	VAMP1	vesicle associated membrane protein 1	-11.2472	2.132e-05
286336	NM_033387	FAM78A	family with sequence similarity 78 member A	88.7267	5.79506e-09	1491	NM_001190463,NM_001902,NM_153742	CTH	cystathionine gamma-lyase	-11.2398	2.07682e-06
100288637	NR_038253,NR_038254,NR_038255	LOC100288637	OTU deubiquitinase 7A pseudogene	88.7199	0.000135318	9619	NM_004915,NM_016818,NM_207174,NM_207627,NM_207628,NM_207629	ABCG1	ATP binding cassette subfamily G member 1	-11.1883	1.25363e-05
728369	NM_001242327	USP17L24	ubiquitin specific peptidase 17-like family member 24	88.6549	1.07243e-08	9241	NM_005450	NOG	noggin	-11.1513	0.000103495
5313	NM_000298,NM_181871	PKLR	pyruvate kinase, liver and RBC	88.4489	1.88785e-07	7466	NM_001145853,NM_006005	WFS1	wolframin ER transmembrane glycoprotein	-11.0403	4.94688e-08
6279	NM_001319196,NM_001319197,NM_001319198,NM_001319201,NM_002964	S100A8	S100 calcium binding protein A8	88.4365	6.21236e-08	7786	NM_001193511,NM_006301	MAP3K12	mitogen-activated protein kinase kinase kinase 12	-10.9687	4.27065e-06
57554	NM_020794	LRRC7	leucine rich repeat containing 7	88.3538	0.000117432	23592	NM_001167614,NM_014319	LEMD3	LEM domain containing 3	-10.8703	3.21127e-05
57722	NM_020962	IGDCC4	immunoglobulin superfamily DCC subclass member 4	87.6254	4.22367e-10	10479	NM_001042537,NM_001177651,NM_006359	SLC9A6	solute carrier family 9 member A6	-10.8358	4.70892e-06
1524	NM_001171171,NM_001171172,NM_001171174,NM_001337	CX3CR1	C-X3-C motif chemokine receptor 1	87.4413	2.41635e-07	29763	NM_001184974,NM_001184975,NM_016223	PACSIN3	protein kinase C and casein kinase substrate in neurons 3	-10.8221	3.88417e-06
1300	NM_000493	COL10A1	collagen type X alpha 1	86.6675	3.24302e-09	693201	NR_030346	MIR616	microRNA 616	-10.7287	0.000161572
100379661	NR_033368	GRIK1-AS2	GRIK1 antisense RNA 2	86.5324	2.86905e-06	27121	NM_014420	DKK4	dickkopf WNT signaling pathway inhibitor 4	-10.688	0.0022801
1238	NM_001296	ACKR2	atypical chemokine receptor 2	86.4342	3.22078e-06	8996	NM_001185057,NM_001276307,NM_001276309,NM_001276311,NM_001276312,NM_001276319,NM_003946	NOL3	nucleolar protein 3	-10.6456	2.05313e-08
22917	NM_207341	ZP1	zona pellucida glycoprotein 1	85.967	1.43504e-09	54206	NM_018948	ERRFI1	ERBB receptor feedback inhibitor 1	-10.5928	0.000300358
7153	NM_001067	TOP2A	topoisomerase (DNA) II alpha 170kDa	85.7286	5.17072e-07	57447	NM_001282211,NM_001282212,NM_001282213,NM_001282214,NM_001282215,NM_001282216,NM_001320329,NM_016250,NM_201535,NM_201536,NM_201537,NM_201538,NM_201539,NM_201540,NM_201541	NDRG2	NDRG family member 2	-10.5815	1.24332e-08
100169757	NR_023368	RNA5S6	RNA, 5S ribosomal 6	85.0657	4.0684e-08	2805	NM_002079	GOT1	glutamic-oxaloacetic transaminase 1	-10.5365	1.03667e-07
100287364	NM_001256859	USP17L18	ubiquitin specific peptidase 17-like family member 18	84.8295	1.4587e-09	4719	NM_001199981,NM_001199982,NM_001199983,NM_001199984,NM_005006	NDUFS1	NADH dehydrogenase (ubiquinone) Fe-S protein 1, 75kDa (NADH-coenzyme Q reductase)	-10.5126	1.49959e-06
100287513	NM_001256863	USP17L22	ubiquitin specific peptidase 17-like family member 22	84.7581	1.05602e-09	2047	NM_004441	EPHB1	EPH receptor B1	-10.455	0.000294437
100131257	NR_034022	LOC100131257	zinc finger protein 655 pseudogene	84.4573	1.23831e-08	5536	NM_001204284,NM_006247	PPP5C	protein phosphatase 5 catalytic subunit	-10.432	2.34121e-05
102465432	NR_106781	MIR6723	microRNA 6723	84.2038	5.65998e-05	1286	NM_000092	COL4A4	collagen type IV alpha 4	-10.3355	1.8881e-08
10673	NM_001145645,NM_006573	TNFSF13B	tumor necrosis factor superfamily member 13b	83.947	4.82421e-10	624	NM_000623	BDKRB2	bradykinin receptor B2	-10.3068	1.64261e-07
1062	NM_001286734,NM_001813	CENPE	centromere protein E	83.6755	7.13593e-10	6376	NM_001304392,NM_002996	CX3CL1	C-X3-C motif chemokine ligand 1	-10.2493	4.61583e-05
147429	NR_026908	AQP4-AS1	AQP4 antisense RNA 1	83.5433	3.27315e-08	8854	NM_001206897,NM_003888,NM_170696,NM_170697	ALDH1A2	aldehyde dehydrogenase 1 family member A2	-10.1893	1.43149e-05
646243	NR_024387	CXADRP2	coxsackie virus and adenovirus receptor pseudogene 2	83.1986	2.56079e-08	333	NM_001024807,NM_005166	APLP1	amyloid beta precursor like protein 1	-10.1832	0.000119651
3855	NM_005556	KRT7	keratin 7	83.0542	5.67781e-06	84958	NM_001193308,NM_032872	SYTL1	synaptotagmin like 1	-10.1229	2.36171e-06
2702	NM_005266,NM_181703	GJA5	gap junction protein alpha 5	80.7366	1.42477e-09	5098	NM_002588,NM_032402,NM_032403	PCDHGC3	protocadherin gamma subfamily C, 3	-10.0638	0.00173469
343263	NM_001010985,NM_001265613	MYBPHL	myosin binding protein H-like	80.4048	7.97205e-09	1525	NM_001207063,NM_001207064,NM_001207065,NM_001207066,NM_001338	CXADR	coxsackie virus and adenovirus receptor	-10.0333	4.77229e-07
101929717	NR_110823	LOC101929717	uncharacterized LOC101929717	80.3297	1.15721e-07	80820	NM_030636	EEPD1	endonuclease/exonuclease/phosphatase family domain containing 1	-10.0268	3.84865e-07
9966	NM_001204344,NM_005118	TNFSF15	tumor necrosis factor superfamily member 15	79.9553	6.42754e-10	55959	NM_001161841,NM_018837,NM_198596	SULF2	sulfatase 2	-10.0208	0.000125979
728379	NM_001242328	USP17L26	ubiquitin specific peptidase 17-like family member 26	79.8656	4.79081e-08	7105	NM_001278740,NM_001278741,NM_001278742,NM_001278743,NM_003270	TSPAN6	tetraspanin 6	-9.9424	0.000431072
744	NM_001145399,NM_001584	MPPED2	metallophosphoesterase domain containing 2	79.4376	2.19791e-06	56123	NM_018933	PCDHB13	protocadherin beta 13	-9.90713	0.000614058
152007	NM_001287010,NM_001287011,NM_001287012,NM_001287013,NM_001287014,NM_022343,NR_104637,NR_104638,NR_104639,NR_104640,NR_104641	GLIPR2	GLI pathogenesis related 2	79.0648	5.03168e-07	358	NM_001185060,NM_001185061,NM_001185062,NM_198098	AQP1	aquaporin 1 (Colton blood group)	-9.86696	0.00416349
586	NM_001178091,NM_001178092,NM_001178093,NM_001178094,NM_005504	BCAT1	branched chain amino acid transaminase 1	78.9183	3.42849e-11	727956	NR_003265	SDHAP2	succinate dehydrogenase complex flavoprotein subunit A pseudogene 2	-9.85703	4.99753e-07
6280	NM_002965	S100A9	S100 calcium binding protein A9	78.5941	1.99362e-07	3949	NM_000527,NM_001195798,NM_001195799,NM_001195800,NM_001195803	LDLR	low density lipoprotein receptor	-9.84268	3.26222e-06
3561	NM_000206	IL2RG	interleukin 2 receptor subunit gamma	78.4923	2.32678e-06	8671	NM_001098484,NM_001134742,NM_003759	SLC4A4	solute carrier family 4 member 4	-9.75666	1.66375e-06
728400	NM_001242331	USP17L28	ubiquitin specific peptidase 17-like family member 28	78.4658	3.93362e-09	10131	NM_001272049,NM_016292	TRAP1	TNF receptor associated protein 1	-9.69686	0.000324524
22989	NM_014981	MYH15	myosin, heavy chain 15	78.3934	2.12264e-08	5129	NM_002596,NM_212502,NM_212503	CDK18	cyclin-dependent kinase 18	-9.67772	2.54263e-06
100129931	NR_033828	LOC100129931	uncharacterized LOC100129931	78.0403	1.5788e-06	4739	NM_001142393,NM_001271033,NM_006403,NM_182966,NR_073131	NEDD9	neural precursor cell expressed, developmentally down-regulated 9	-9.65381	1.68112e-05
100287327	NM_001256857	USP17L17	ubiquitin specific peptidase 17-like family member 17	78.0269	1.18262e-08	1040	NM_001263	CDS1	CDP-diacylglycerol synthase 1	-9.64543	6.68861e-05
1063	NM_016343	CENPF	centromere protein F	77.9711	8.8402e-10	23270	NM_021648	TSPYL4	TSPY-like 4	-9.6276	7.91596e-07
50507	NM_001143836,NM_001143837,NM_001291926,NM_001291927,NM_001291929,NM_001300995,NM_016931,NR_120406	NOX4	NADPH oxidase 4	77.9077	1.50707e-10	1119	NM_001277,NM_212469	CHKA	choline kinase alpha	-9.6149	1.89239e-06
115908	NM_001256099,NM_138455	CTHRC1	collagen triple helix repeat containing 1	77.5813	5.29402e-09	10768	NM_001242673,NM_001242674,NM_001242675,NM_001242676,NM_006621	AHCYL1	adenosylhomocysteinase like 1	-9.61395	3.4615e-07
107	NM_001281768,NM_021116	ADCY1	adenylate cyclase 1 (brain)	77.5599	3.08374e-07	317781	NM_175066	DDX51	DEAD-box helicase 51	-9.5745	4.32413e-06
8942	NM_001032998,NM_001199241,NM_003937	KYNU	kynureninase	77.1692	8.90295e-06	197257	NM_153486,NM_194436	LDHD	lactate dehydrogenase D	-9.56993	0.000154426
219348	NM_001012973	PLAC9	placenta specific 9	76.7982	2.37248e-06	7163	NM_001025252,NM_001025253,NM_001287140,NM_001287142,NM_001287143,NM_001287144,NM_005079,NR_105033,NR_105034,NR_105035,NR_105036,NR_105037	TPD52	tumor protein D52	-9.4873	3.71341e-06
100131347	NR_036551	LOC100131347	RAD52 motif containing 1 pseudogene	75.6456	1.69113e-09	8045	NM_001143993,NM_001143994,NM_003475	RASSF7	Ras association domain family member 7	-9.47275	2.01088e-08
677836	NR_002985	SNORA58	small nucleolar RNA, H/ACA box 58	75.4487	1.03807e-06	148641	NM_001300845,NM_173508	SLC35F3	solute carrier family 35 member F3	-9.45078	0.000541726
101929746	NR_110623	ZNF341-AS1	ZNF341 antisense RNA 1	75.366	1.97814e-06	9572	NM_021724	NR1D1	nuclear receptor subfamily 1 group D member 1	-9.40144	0.000845273
388714	NR_002601	FMO6P	flavin containing monooxygenase 6 pseudogene	73.8739	9.79821e-07	5213	NM_000289,NM_001166686,NM_001166687,NM_001166688	PFKM	phosphofructokinase, muscle	-9.38457	1.6519e-07
963	NM_000560,NM_001040033,NM_001320638	CD53	CD53 molecule	73.5962	1.31954e-07	5210	NM_001317134,NM_001317135,NM_001317136,NM_001317137,NM_001317138,NM_004567	PFKFB4	6-phosphofructo-2-kinase/fructose-2,6-biphosphatase 4	-9.31863	2.62523e-05
285429	NM_001029955	DCAF4L1	DDB1 and CUL4 associated factor 4-like 1	73.5933	2.11949e-10	7915	NM_001080,NM_170740	ALDH5A1	aldehyde dehydrogenase 5 family member A1	-9.27738	0.000262295
64478	NM_033225	CSMD1	CUB and Sushi multiple domains 1	73.3065	6.36195e-09	1785	NM_001005360,NM_001005361,NM_001005362,NM_001190716,NM_004945	DNM2	dynamin 2	-9.23005	3.21306e-06
259307	NM_001258017,NM_001258018,NM_152899,NM_172374,NR_047577	IL4I1	interleukin 4 induced 1	73.2713	1.27441e-05	2886	NM_001030002,NM_001242442,NM_001242443,NM_005310	GRB7	growth factor receptor bound protein 7	-9.17397	5.54463e-06
123722	NM_001007122,NM_001281805,NM_001281806	FSD2	fibronectin type III and SPRY domain containing 2	73.242	3.54658e-14	29890	NM_013286	RBM15B	RNA binding motif protein 15B	-9.13417	4.66264e-05
9212	NM_001256834,NM_001284526,NM_001313950,NM_001313951,NM_001313952,NM_001313953,NM_001313954,NM_001313955,NM_004217,NR_132730,NR_132731	AURKB	aurora kinase B	73.0672	3.83817e-06	1630	NM_005215	DCC	DCC netrin 1 receptor	-9.09474	0.000154731
285696	NR_027253	LOC285696	uncharacterized LOC285696	72.7585	2.15215e-08	50650	NM_001128615,NM_001128616,NM_001289698,NM_019555	ARHGEF3	Rho guanine nucleotide exchange factor 3	-9.0563	6.53945e-06
79166	NR_003061	LILRP2	leukocyte immunoglobulin-like receptor pseudogene 2	72.4283	1.10845e-08	58489	NM_021214	ABHD17C	abhydrolase domain containing 17C	-9.02719	0.000613265
6538	NM_001317406,NM_014229	SLC6A11	solute carrier family 6 member 11	72.1958	1.53602e-11	92305	NM_001127266,NM_138385	TMEM129	transmembrane protein 129	-9.01411	1.04414e-07
22871	NM_014932	NLGN1	neuroligin 1	72.1637	3.47349e-09	8867	NM_001160302,NM_001160306,NM_003895,NM_203446	SYNJ1	synaptojanin 1	-9.00442	1.06411e-06
79933	NM_001114133,NM_024875	SYNPO2L	synaptopodin 2 like	72.1468	1.00372e-06	133522	NM_001172698,NM_001172699,NM_133263	PPARGC1B	PPARG coactivator 1 beta	-8.96182	0.000251528
63924	NM_001199551,NM_001199552,NM_001199623,NM_001321142,NM_001321143,NM_001321144,NM_022094	CIDEC	cell death inducing DFFA like effector c	72.1096	7.35002e-08	8490	NM_001195303,NM_001254748,NM_001254749,NM_003617,NR_045630	RGS5	regulator of G-protein signaling 5	-8.95785	0.000872041
79541	NM_030908	OR2A4	olfactory receptor family 2 subfamily A member 4	71.4793	8.16438e-08	22829	NM_001164238,NM_001206850,NM_014893,NR_028319,NR_046355	NLGN4Y	neuroligin 4, Y-linked	-8.94959	0.000556375
728373	NM_001242326	USP17L25	ubiquitin specific peptidase 17-like family member 25	71.1593	1.2881e-07	64061	NM_022117	TSPYL2	TSPY-like 2	-8.9254	0.00018124
60468	NM_001170794,NM_021813	BACH2	BTB domain and CNC homolog 2	70.9605	1.34965e-06	51477	NM_001170938,NM_001253389,NM_016368,NR_045573,NR_045574	ISYNA1	inositol-3-phosphate synthase 1	-8.91951	5.32526e-07
54941	NM_017831	RNF125	ring finger protein 125, E3 ubiquitin protein ligase	70.9451	1.88946e-09	23344	NM_001184796,NM_015292	ESYT1	extended synaptotagmin protein 1	-8.89813	1.38398e-06
3683	NM_001114380,NM_002209	ITGAL	integrin subunit alpha L	70.555	1.12994e-09	35	NM_000017,NM_001302554	ACADS	acyl-CoA dehydrogenase, C-2 to C-3 short chain	-8.86716	0.000106497
100873946	NR_046653	VAV3-AS1	VAV3 antisense RNA 1	70.5297	6.79067e-06	23762	NM_001282738,NM_001282739,NM_001282740,NM_001282741,NM_001282742,NM_030758	OSBP2	oxysterol binding protein 2	-8.8383	1.29663e-05
391627	NR_046416	USP17L9P	ubiquitin specific peptidase 17-like family member 9, pseudogene	70.2828	3.02198e-09	3859	NM_000223	KRT12	keratin 12	-8.71031	0.00873619
81624	NM_001042517,NM_001258366,NM_001258367,NM_001258368,NM_001258369,NM_001258370,NM_030932	DIAPH3	diaphanous related formin 3	69.8643	1.99079e-07	54893	NM_017762	MTMR10	myotubularin related protein 10	-8.68543	1.57043e-05
84054	NR_001282	PCDHB19P	protocadherin beta 19 pseudogene	69.5087	1.29316e-08	55735	NM_018198	DNAJC11	DnaJ heat shock protein family (Hsp40) member C11	-8.6546	1.09767e-06
100287441	NM_001256861	USP17L20	ubiquitin specific peptidase 17-like family member 20	69.3449	2.88388e-09	22907	NM_014966,NM_138615,NR_075079	DHX30	DEAH-box helicase 30	-8.53483	5.68999e-05
29953	NM_013381	TRHDE	thyrotropin releasing hormone degrading enzyme	69.2318	6.50445e-07	6720	NM_001005291,NM_001321096,NM_004176	SREBF1	sterol regulatory element binding transcription factor 1	-8.53232	0.000492469
101928992	NR_110043	LOC101928992	uncharacterized LOC101928992	69.2219	1.11932e-08	51061	NM_001303447,NM_001324022,NM_001324024,NM_001324025,NM_015914,NR_136671,NR_136672,NR_136673,NR_136674	TXNDC11	thioredoxin domain containing 11	-8.5251	9.3534e-06
23025	NM_001080421	UNC13A	unc-13 homolog A (C. elegans)	69.1008	7.4052e-09	23208	NM_152280	SYT11	synaptotagmin 11	-8.52165	0.000895068
100287238	NM_001256855	USP17L13	ubiquitin specific peptidase 17-like family member 13	68.9519	1.4542e-08	64327	NM_022458	LMBR1	limb development membrane protein 1	-8.52147	5.77087e-05
677882	NR_003022	SNORA59B	small nucleolar RNA, H/ACA box 59B	68.2701	4.09585e-07	2887	NM_001001549,NM_001001550,NM_001001555,NM_005311	GRB10	growth factor receptor bound protein 10	-8.50061	7.64154e-06
1462	NM_001126336,NM_001164097,NM_001164098,NM_004385	VCAN	versican	68.1605	7.26267e-07	6522	NM_001199692,NM_001199693,NM_001199694,NM_003040	SLC4A2	solute carrier family 4 member 2	-8.42643	3.16573e-06
448834	NM_001025231	KPRP	keratinocyte proline rich protein	67.8094	7.51243e-08	25766	NM_001031698,NM_012272	PRPF40B	pre-mRNA processing factor 40 homolog B	-8.4146	0.000424267
728405	NM_001242332	USP17L29	ubiquitin specific peptidase 17-like family member 29	67.697	1.59928e-08	84193	NM_032233,NM_199123	SETD3	SET domain containing 3	-8.38687	9.62836e-06
100289574	NR_109773	HERC2P4	hect domain and RLD 2 pseudogene 4	67.4373	5.79897e-08	23729	NM_013276	SHPK	sedoheptulokinase	-8.37664	7.71142e-06
646074	NR_024593	POM121L10P	POM121 transmembrane nucleoporin like 10, pseudogene	67.3903	7.33361e-07	5099	NM_001173523,NM_002589,NM_032456,NM_032457	PCDH7	protocadherin 7	-8.28283	1.97157e-05
55803	NM_018404	ADAP2	ArfGAP with dual PH domains 2	67.2335	1.29913e-07	9993	NM_001173533,NM_001173534,NM_001184781,NM_005137,NR_033674	DGCR2	DiGeorge syndrome critical region gene 2	-8.28038	0.000251219
2257	NM_004113,NM_021032	FGF12	fibroblast growth factor 12	67.0047	3.3486e-07	23101	NM_015078	MCF2L2	MCF.2 cell line derived transforming sequence-like 2	-8.23174	0.000155837
222553	NM_001029858	SLC35F1	solute carrier family 35 member F1	66.8995	4.5525e-05	113791	NM_001135911,NM_052880	PIK3IP1	phosphoinositide-3-kinase interacting protein 1	-8.22325	3.57684e-05
1244	NM_000392	ABCC2	ATP binding cassette subfamily C member 2	65.3613	1.35829e-07	284047	NR_036647	CCDC144B	coiled-coil domain containing 144B (pseudogene)	-8.18078	7.40631e-07
6546	NM_001112800,NM_001112801,NM_001112802,NM_001252624,NM_021097	SLC8A1	solute carrier family 8 member A1	65.2922	1.1727e-07	5142	NM_001037339,NM_001037340,NM_001037341,NM_001297440,NM_001297441,NM_001297442,NM_002600	PDE4B	phosphodiesterase 4B	-8.14799	3.96004e-06
29128	NM_001048201,NM_001290050,NM_001290051,NM_001290052,NM_013282	UHRF1	ubiquitin like with PHD and ring finger domains 1	65.2261	2.09851e-10	54414	NM_001199922,NM_170601	SIAE	sialic acid acetylesterase	-8.13664	8.91364e-05
4688	NM_000433,NM_001127651,NM_001190789,NM_001190794	NCF2	neutrophil cytosolic factor 2	65.0219	7.6138e-05	2263	NM_000141,NM_001144913,NM_001144914,NM_001144915,NM_001144916,NM_001144917,NM_001144918,NM_001144919,NM_001320654,NM_001320658,NM_022970,NM_023029,NR_073009	FGFR2	fibroblast growth factor receptor 2	-8.10313	5.01696e-07
728419	NM_001256867	USP17L30	ubiquitin specific peptidase 17-like family member 30	64.7013	2.97348e-08	51361	NM_015888	HOOK1	hook microtubule-tethering protein 1	-8.08609	0.000306724
100132724	NR_027642	DCAF13P3	DDB1 and CUL4 associated factor 13 pseudogene 3	64.5808	2.55192e-07	51307	NM_001135647,NM_016605	FAM53C	family with sequence similarity 53 member C	-8.07867	1.80168e-05
9389	NM_001320033,NM_004803	SLC22A14	solute carrier family 22 member 14	64.387	1.15615e-06	54101	NM_020639	RIPK4	receptor interacting serine/threonine kinase 4	-8.07431	0.000202616
57615	NM_020855	ZNF492	zinc finger protein 492	63.9845	7.45222e-09	64793	NM_001281517,NM_001281518,NM_001319944,NM_022778	CEP85	centrosomal protein 85	-8.06401	2.81064e-05
80816	NM_030632	ASXL3	additional sex combs like 3, transcriptional regulator	63.8042	3.42646e-06	11060	NM_001270453,NM_001270454,NM_001270455,NM_007014,NM_199424	WWP2	WW domain containing E3 ubiquitin protein ligase 2	-8.05586	2.37944e-06
105371849	NR_135648	LOC105371849	uncharacterized LOC105371849	63.249	1.70562e-06	23007	NM_001130960,NM_001130961,NM_014996	PLCH1	phospholipase C eta 1	-8.03013	1.75509e-06
341350	NM_183378	OVCH1	ovochymase 1	63.2191	4.85612e-08	9185	NM_001080975,NM_004726	REPS2	RALBP1 associated Eps domain containing 2	-8.01504	1.67271e-05
728386	NM_001242329	USP17L5	ubiquitin specific peptidase 17-like family member 5	63.1645	6.46354e-08	5187	NM_002616	PER1	period circadian clock 1	-7.97799	2.89635e-05
101927954	NR_121565	LOC101927954	uncharacterized LOC101927954	62.9442	3.1447e-07	51741	NM_001291997,NM_016373,NM_130791,NR_120435,NR_120436	WWOX	WW domain containing oxidoreductase	-7.97013	0.000155399
57082	NM_144508,NM_170589	CASC5	cancer susceptibility candidate 5	62.8928	1.30632e-09	222865	NM_001134450,NM_001134451,NM_152913	TMEM130	transmembrane protein 130	-7.95579	0.0019979
864	NM_001031680,NM_001320672,NM_004350	RUNX3	runt related transcription factor 3	62.6515	3.83316e-09	309	NM_001155,NM_001193544	ANXA6	annexin A6	-7.94691	2.05849e-05
101926966	NR_110201	LOC101926966	uncharacterized LOC101926966	62.517	1.54626e-08	10893	NM_006690	MMP24	matrix metallopeptidase 24	-7.94661	0.00024621
2533	NM_001243093,NM_001465,NM_199335	FYB	FYN binding protein	62.4847	1.22217e-06	100134229	NR_024451	JHDM1D-AS1	JHDM1D antisense RNA 1 (head to head)	-7.94521	3.57509e-05
1015	NM_001144663,NM_004063	CDH17	cadherin 17	62.4762	5.25278e-07	26173	NM_001080453	INTS1	integrator complex subunit 1	-7.94243	1.17661e-05
55771	NM_018304	PRR11	proline rich 11	62.1184	3.39662e-08	5190	NM_000287,NM_001316313,NR_133009	PEX6	peroxisomal biogenesis factor 6	-7.93664	6.00137e-05
101928797	NR_109806	LOC101928797	uncharacterized LOC101928797	61.928	1.27001e-07	949	NM_001082959,NM_005505	SCARB1	scavenger receptor class B member 1	-7.93446	0.000122618
150365	NM_152513	MEI1	meiotic double-stranded break formation protein 1	61.5073	2.47241e-09	4647	NM_000260,NM_001127179,NM_001127180	MYO7A	myosin VIIA	-7.93309	1.76819e-05
101929124	NR_110427	LOC101929124	uncharacterized LOC101929124	60.8082	3.09851e-05	55028	NM_001100621,NM_001100622,NM_001288770,NM_001288771,NM_017941,NR_110105	C17orf80	chromosome 17 open reading frame 80	-7.93209	0.000201893
81553	NM_030797	FAM49A	family with sequence similarity 49 member A	60.4667	1.48012e-07	7779	NM_021194	SLC30A1	solute carrier family 30 member 1	-7.85444	0.000715992
1767	NM_001369	DNAH5	dynein axonemal heavy chain 5	60.4294	2.9153e-09	7277	NM_001278552,NM_006000	TUBA4A	tubulin alpha 4a	-7.84129	2.34208e-06
60437	NM_021810,NM_177980	CDH26	cadherin 26	60.3504	7.29888e-09	64787	NM_022772	EPS8L2	EPS8 like 2	-7.82659	0.00192598
57482	NM_020722	KIAA1211	KIAA1211	60.2426	4.836e-08	5351	NM_000302,NM_001316320	PLOD1	procollagen-lysine,2-oxoglutarate 5-dioxygenase 1	-7.80134	3.50917e-05
55811	NM_001167749,NM_001297772,NM_018417	ADCY10	adenylate cyclase 10 (soluble)	60.0637	1.83514e-08	91653	NM_001301861,NM_001301867,NM_033254	BOC	BOC cell adhesion associated, oncogene regulated	-7.78467	1.47185e-05
391622	NR_027279	USP17L6P	ubiquitin specific peptidase 17-like family member 6, pseudogene	59.7932	3.00395e-08	8313	NM_004655	AXIN2	axin 2	-7.78264	0.000792039
50615	NM_021798,NM_181078,NM_181079	IL21R	interleukin 21 receptor	59.7733	2.18015e-06	55711	NM_001271783,NM_001271784,NM_018099	FAR2	fatty acyl-CoA reductase 2	-7.755	1.31165e-06
10437	NM_006332	IFI30	IFI30, lysosomal thiol reductase	59.6329	1.91495e-05	63891	NM_022064,NR_135218	RNF123	ring finger protein 123	-7.74544	2.45723e-06
2560	NM_000812	GABRB1	gamma-aminobutyric acid type A receptor beta1 subunit	59.3117	7.18616e-10	55565	NM_001201552,NM_001201553,NM_001201554,NM_001201556,NM_001318238,NM_001318239,NM_017530	ZNF821	zinc finger protein 821	-7.7191	0.000159341
100287478	NM_001256862	USP17L21	ubiquitin specific peptidase 17-like family member 21	59.2078	1.88996e-08	92370	NM_001037172,NM_001282728,NM_152282	PXYLP1	2-phosphoxylose phosphatase 1	-7.68959	4.21478e-05
79923	NM_001297698,NM_024865	NANOG	Nanog homeobox	59.1454	1.30955e-05	51308	NM_001271803,NM_016606,NR_073448,NR_073449	REEP2	receptor accessory protein 2	-7.65243	0.00011195
100130771	NR_027068	EFCAB10	EF-hand calcium binding domain 10	59.1436	1.78976e-08	55351	NM_001306082,NM_018401	STK32B	serine/threonine kinase 32B	-7.6412	0.000165162
100505532	NR_103854	LINC01301	long intergenic non-protein coding RNA 1301	59.1163	4.16513e-09	10580	NM_001034954,NM_001034955,NM_001034956,NM_001034957,NM_001290294,NM_001290295,NM_001290296,NM_001290297,NM_001290298,NM_006434,NM_015385,NM_024991	SORBS1	sorbin and SH3 domain containing 1	-7.60807	2.40726e-06
51393	NM_016113	TRPV2	transient receptor potential cation channel subfamily V member 2	58.291	1.50832e-08	22986	NM_014978	SORCS3	sortilin related VPS10 domain containing receptor 3	-7.60173	0.000157654
995	NM_001287582,NM_001287583,NM_001318098,NM_001790,NM_022809	CDC25C	cell division cycle 25C	57.9958	4.91213e-07	9455	NM_004839,NM_199330	HOMER2	homer scaffolding protein 2	-7.60105	8.89061e-05
728393	NM_001242330	USP17L27	ubiquitin specific peptidase 17-like family member 27	57.9294	1.29354e-06	3638	NM_005542,NM_198336,NM_198337	INSIG1	insulin induced gene 1	-7.59578	0.000106461
57096	NM_020366	RPGRIP1	retinitis pigmentosa GTPase regulator interacting protein 1	57.6115	4.84285e-08	51302	NM_001278738,NM_001278739,NM_016593	CYP39A1	cytochrome P450 family 39 subfamily A member 1	-7.56966	5.96494e-05
5031	NM_001277204,NM_001277205,NM_001277206,NM_001277207,NM_001277208,NM_176796,NM_176797,NM_176798	P2RY6	pyrimidinergic receptor P2Y6	57.546	1.28662e-05	50	NM_001098	ACO2	aconitase 2	-7.5681	0.00015624
6035	NM_002933,NM_198232,NM_198234,NM_198235	RNASE1	ribonuclease A family member 1, pancreatic	57.3488	1.33908e-05	57466	NM_001145444,NM_001145445,NM_020706	SCAF4	SR-related CTD associated factor 4	-7.55023	2.44669e-05
8875	NM_001242350,NM_004665,NM_078488,NR_034173,NR_034174,NR_110143,NR_110144,NR_110145,NR_110146	VNN2	vanin 2	56.6517	1.77705e-07	84701	NM_032609	COX4I2	cytochrome c oxidase subunit 4I2	-7.53319	8.40973e-05
140687	NM_080615	GCNT7	glucosaminyl (N-acetyl) transferase family member 7	56.6198	2.52537e-05	1956	NM_005228,NM_201282,NM_201283,NM_201284	EGFR	epidermal growth factor receptor	-7.53157	0.000171542
399948	NM_001302644,NM_001302645,NM_001302646,NM_001302647,NM_001302648,NM_207429	COLCA1	colorectal cancer associated 1	56.4191	3.25093e-06	4121	NM_005907	MAN1A1	mannosidase alpha class 1A member 1	-7.47166	2.39215e-06
100129027	NR_038876	LOC100129027	uncharacterized LOC100129027	56.0796	7.69282e-09	114818	NM_052920	KLHL29	kelch like family member 29	-7.45075	0.000227434
57408	NM_001304389,NM_020678	LRTM1	leucine-rich repeats and transmembrane domains 1	55.6688	8.20426e-07	375248	NM_001164315	ANKRD36	ankyrin repeat domain 36	-7.44115	1.52883e-05
346007	NM_001142800,NM_001142801,NM_001292009,NM_198283	EYS	eyes shut homolog (Drosophila)	55.5245	7.25695e-08	6653	NM_003105	SORL1	sortilin-related receptor, L(DLR class) A repeats containing	-7.44051	0.000101543
6327	NM_004588	SCN2B	sodium voltage-gated channel beta subunit 2	55.1673	1.13125e-07	9110	NM_004687	MTMR4	myotubularin related protein 4	-7.43868	3.22002e-05
221074	NM_001145195,NM_001282733,NM_001282734,NM_152725	SLC39A12	solute carrier family 39 member 12	55.0909	0.000114222	482	NM_001303263,NM_001678	ATP1B2	ATPase Na+/K+ transporting subunit beta 2	-7.43081	1.95752e-06
56899	NM_001204065,NM_001204066,NM_001204067,NM_001204068,NM_001204069,NM_001204070,NM_001204079,NM_001204080,NM_001204081,NM_020140,NM_152788,NM_181670	ANKS1B	ankyrin repeat and sterile alpha motif domain containing 1B	55.0445	1.10425e-07	79877	NM_001128631,NM_001288654,NM_001288655,NM_001321326,NM_024819	DCAKD	dephospho-CoA kinase domain containing	-7.39201	5.85602e-05
131890	NM_139209	GRK7	G protein-coupled receptor kinase 7	54.6681	2.8686e-07	58491	NM_021216	ZNF71	zinc finger protein 71	-7.37598	0.00108982
126364	NM_145256	LRRC25	leucine rich repeat containing 25	54.4843	3.93362e-07	1628	NM_001352	DBP	D-box binding PAR bZIP transcription factor	-7.3731	5.13513e-07
101929140	NR_120423	LOC101929140	uncharacterized LOC101929140	54.4824	2.50275e-07	2690	NM_000163,NM_001242399,NM_001242400,NM_001242401,NM_001242402,NM_001242403,NM_001242404,NM_001242405,NM_001242406,NM_001242460,NM_001242462	GHR	growth hormone receptor	-7.35423	0.00103776
57091	NM_001164114,NM_001164115,NM_001164116,NM_020356	CASS4	Cas scaffolding protein family member 4	54.2524	2.30491e-06	5573	NM_001276289,NM_001276290,NM_001278433,NM_002734,NM_212471,NM_212472	PRKAR1A	protein kinase cAMP-dependent type I regulatory subunit alpha	-7.34443	1.96684e-06
642477	NR_122111,NR_122112	LINC01296	long intergenic non-protein coding RNA 1296	54.0503	3.95466e-07	54946	NM_001008485,NM_001008486,NM_001008487,NM_001164475,NM_017836	SLC41A3	solute carrier family 41 member 3	-7.32719	2.56921e-05
401427	NM_001005328	OR2A7	olfactory receptor family 2 subfamily A member 7	53.8095	1.08472e-05	4779	NM_003204	NFE2L1	nuclear factor, erythroid 2 like 1	-7.29976	1.24161e-05
968	NM_001040059,NM_001251	CD68	CD68 molecule	53.6853	4.37476e-07	4627	NM_002473	MYH9	myosin, heavy chain 9, non-muscle	-7.28664	3.69782e-06
54847	NM_001308350,NM_001322294,NM_001322295,NM_001322296,NM_001322297,NM_001322298,NM_001322299,NM_001322300,NM_017699,NR_136280,NR_136281,NR_136282,NR_136283,NR_136284,NR_136285	SIDT1	SID1 transmembrane family member 1	53.4482	6.02436e-05	148979	NM_147193	GLIS1	GLIS family zinc finger 1	-7.28297	1.89207e-05
115827	NM_001317915,NM_138453	RAB3C	RAB3C, member RAS oncogene family	53.1596	2.9878e-07	26056	NM_015470	RAB11FIP5	RAB11 family interacting protein 5	-7.27503	1.54062e-05
731424	NR_037867,NR_132989	MIR3945HG	MIR3945 host gene	52.698	1.13211e-05	80031	NM_001198999,NM_020858,NM_024966,NM_153616,NM_153617,NM_153618,NM_153619	SEMA6D	semaphorin 6D	-7.24995	3.8979e-05
439950	NR_046108	CELF2-AS2	CELF2 antisense RNA 2	52.6046	4.38749e-07	9985	NM_001048205,NM_005132	REC8	REC8 meiotic recombination protein	-7.24847	0.000113075
360200	NM_182973	TMPRSS9	transmembrane protease, serine 9	52.5399	5.74538e-07	51310	NM_001289050,NM_016609,NM_020372,NR_110290	SLC22A17	solute carrier family 22 member 17	-7.21124	9.64857e-07
3662	NM_001195286,NM_002460,NR_046000	IRF4	interferon regulatory factor 4	51.649	3.50367e-08	5297	NM_058004	PI4KA	phosphatidylinositol 4-kinase alpha	-7.19619	4.17184e-06
5551	NM_001083116,NM_005041	PRF1	perforin 1	51.6456	1.53892e-08	5336	NM_002661	PLCG2	phospholipase C gamma 2	-7.19233	1.21232e-05
26047	NM_014141	CNTNAP2	contactin associated protein-like 2	51.1053	5.65209e-06	1296	NM_001294347,NM_005202	COL8A2	collagen type VIII alpha 2	-7.16946	4.94785e-06
387911	NM_001007537,NR_104426	C1QTNF9B	C1q and tumor necrosis factor related protein 9B	51.0222	0.000114516	54498	NM_001270691,NM_175839,NM_175840,NM_175841,NM_175842	SMOX	spermine oxidase	-7.14208	0.000103573
4982	NM_002546	TNFRSF11B	tumor necrosis factor receptor superfamily member 11b	50.8674	9.49523e-07	4798	NM_001143835,NM_006165	NFRKB	nuclear factor related to kappaB binding protein	-7.13835	5.52312e-05
2568	NM_001291985,NM_014211	GABRP	gamma-aminobutyric acid type A receptor pi subunit	50.6666	6.0674e-05	3727	NM_001286968,NM_005354	JUND	JunD proto-oncogene, AP-1 transcription factor subunit	-7.12825	0.000254725
29974	NM_001198818,NM_001198819,NM_001198820,NM_014576,NM_138932,NM_138933	A1CF	APOBEC1 complementation factor	50.4126	6.63444e-06	582	NM_024649	BBS1	Bardet-Biedl syndrome 1	-7.11504	2.30806e-06
9235	NM_001012631,NM_001012632,NM_001012633,NM_001012634,NM_001012635,NM_001012636,NM_001012718,NM_001308078,NM_004221	IL32	interleukin 32	50.3103	1.92109e-12	55139	NM_001042410,NM_001282792,NM_018089	ANKZF1	ankyrin repeat and zinc finger domain containing 1	-7.11133	0.00207281
100271873	NR_047511,NR_047514	AIRN	antisense of IGF2R non-protein coding RNA	50.2936	0.000124565	162515	NM_153357	SLC16A11	solute carrier family 16 member 11	-7.10899	5.02116e-05
6334	NM_001177984,NM_014191	SCN8A	sodium voltage-gated channel alpha subunit 8	49.8168	1.92758e-06	56929	NM_020177	FEM1C	fem-1 homolog C	-7.08216	2.26817e-05
441168	NM_001010919,NM_001276460	FAM26F	family with sequence similarity 26 member F	49.6844	3.35507e-05	122622	NM_001320424,NM_152328,NM_199165	ADSSL1	adenylosuccinate synthase like 1	-7.04954	0.000272643
115004	NM_138441	MB21D1	Mab-21 domain containing 1	49.5833	7.35077e-07	84340	NM_001281302,NM_032380,NM_170681,NM_170691,NR_104006	GFM2	G elongation factor, mitochondrial 2	-7.03514	0.000121406
6708	NM_003126	SPTA1	spectrin alpha, erythrocytic 1	49.5491	5.84249e-08	9645	NM_001282663,NM_001282664,NM_001282665,NM_001282666,NM_001282667,NM_001282668,NM_014632	MICAL2	microtubule associated monooxygenase, calponin and LIM domain containing 2	-7.02521	5.58549e-05
5222	NM_014224	PGA5	pepsinogen 5, group I (pepsinogen A)	49.4064	1.04688e-07	387700	NM_213606	SLC16A12	solute carrier family 16 member 12	-7.01227	0.000764033
9473	NM_001039477,NM_001105556,NM_001286113,NM_001286115,NM_004848	THEMIS2	thymocyte selection associated family member 2	49.3506	0.000111178	10210	NM_001195622,NM_005802	TOPORS	TOP1 binding arginine/serine rich protein	-7.00845	0.000109135
80129	NM_025059	CCDC170	coiled-coil domain containing 170	48.9799	9.81546e-10	6397	NM_001039573,NM_001143998,NM_001143999,NM_001144001,NM_001204408,NM_001204410,NM_003003	SEC14L1	SEC14 like lipid binding 1	-7.00508	1.98157e-05
25984	NM_001282433,NM_015515	KRT23	keratin 23	48.3305	6.14645e-07	5590	NM_001033581,NM_001033582,NM_001242874,NM_002744	PRKCZ	protein kinase C zeta	-6.97454	0.000250848
151056	NM_001170585,NM_153021	PLB1	phospholipase B1	47.8547	7.23088e-07	11041	NM_006876	B4GAT1	beta-1,4-glucuronyltransferase 1	-6.96609	0.000890774
282996	NM_001134363	RBM20	RNA binding motif protein 20	47.8334	1.6377e-07	3033	NM_001184705,NM_005327	HADH	hydroxyacyl-CoA dehydrogenase	-6.96201	0.000123091
5251	NM_000444,NM_001282754	PHEX	phosphate regulating endopeptidase homolog, X-linked	47.8119	1.66715e-06	79956	NM_024896	ERMP1	endoplasmic reticulum metallopeptidase 1	-6.95864	1.26209e-05
101867536	NR_109833	PRNCR1	prostate cancer associated non-coding RNA 1	47.7595	1.78507e-06	54842	NM_017694	MFSD6	major facilitator superfamily domain containing 6	-6.9505	6.13816e-05
101928988	NR_120344	LOC101928988	uncharacterized LOC101928988	47.7556	1.48398e-05	9854	NM_001290474,NM_014807	C2CD2L	C2CD2 like	-6.92069	0.000186493
64333	NM_001080156,NM_001080157,NM_001319850,NM_001319851,NM_001319852,NM_032496	ARHGAP9	Rho GTPase activating protein 9	47.4475	3.11851e-06	1942	NM_004428,NM_182685	EFNA1	ephrin A1	-6.90751	0.000703961
392197	NM_001256869	USP17L7	ubiquitin specific peptidase 17-like family member 7	47.4051	7.0173e-06	2821	NM_000175,NM_001184722,NM_001289789,NM_001289790	GPI	glucose-6-phosphate isomerase	-6.87966	5.08206e-06
89958	NM_178448	SAPCD2	suppressor APC domain containing 2	47.3582	7.90677e-07	10314	NM_001136574,NM_001136575,NM_006055	LANCL1	LanC like 1	-6.86559	5.85858e-07
646214	NR_027053	LOC646214	p21 protein (Cdc42/Rac)-activated kinase 2 pseudogene	46.7924	1.77158e-09	80223	NM_001002814,NM_025151	RAB11FIP1	RAB11 family interacting protein 1	-6.86008	0.00040371
344967	NR_027277	LOC344967	acyl-CoA thioesterase 7 pseudogene	46.6657	5.05007e-08	100820829	NM_001018100,NM_152451	MYZAP	myocardial zonula adherens protein	-6.84985	0.0219455
5740	NM_000961	PTGIS	prostaglandin I2 (prostacyclin) synthase	46.398	1.20373e-06	10514	NM_001105538,NM_014520	MYBBP1A	MYB binding protein 1a	-6.84205	3.7635e-05
4500	NR_001447	MT1L	metallothionein 1L (gene/pseudogene)	46.2938	1.72595e-07	4354	NM_001166460,NM_001166461,NM_001166462,NM_002436	MPP1	membrane palmitoylated protein 1	-6.82611	0.000623609
2570	NM_002043	GABRR2	gamma-aminobutyric acid type A receptor rho2 subunit	45.8178	7.59895e-07	7317	NM_003334,NM_153280	UBA1	ubiquitin like modifier activating enzyme 1	-6.81009	0.00106323
220134	NM_001039535,NM_145060	SKA1	spindle and kinetochore associated complex subunit 1	45.6516	1.658e-08	3707	NM_002221	ITPKB	inositol-trisphosphate 3-kinase B	-6.78511	1.03387e-05
84659	NM_032572	RNASE7	ribonuclease A family member 7	45.5211	1.71302e-07	481	NM_001677	ATP1B1	ATPase Na+/K+ transporting subunit beta 1	-6.78255	0.000220369
401563	NM_207511	C9orf139	chromosome 9 open reading frame 139	45.3549	1.31499e-05	7071	NM_001032282,NM_005655,NR_103759,NR_103760	KLF10	Kruppel-like factor 10	-6.76447	0.000890674
27133	NM_139318,NM_172375	KCNH5	potassium voltage-gated channel subfamily H member 5	45.265	1.03921e-05	26018	NM_015541	LRIG1	leucine-rich repeats and immunoglobulin like domains 1	-6.72241	8.83144e-06
7837	NM_012293	PXDN	peroxidasin	45.0537	1.87135e-05	57026	NM_020315	PDXP	pyridoxal phosphatase	-6.71764	5.4392e-06
1373	NM_001122633,NM_001122634,NM_001875	CPS1	carbamoyl-phosphate synthase 1	44.8938	6.40013e-06	55229	NM_018216	PANK4	pantothenate kinase 4	-6.71445	0.000526568
925	NM_001145873,NM_001768,NM_171827,NR_027353	CD8A	CD8a molecule	44.8929	0.00138993	114789	NM_001006641,NM_001006642,NM_001265614,NM_052901,NR_049766	SLC25A25	solute carrier family 25 member 25	-6.71311	0.000281036
4481	NM_002445,NM_138715,NM_138716	MSR1	macrophage scavenger receptor 1	44.5039	9.12247e-07	84709	NM_032623	MGARP	mitochondria localized glutamic acid rich protein	-6.71217	6.95653e-05
3763	NM_002240	KCNJ6	potassium voltage-gated channel subfamily J member 6	44.3332	2.62635e-06	57553	NM_001122731,NM_001136004,NM_015241	MICAL3	microtubule associated monooxygenase, calponin and LIM domain containing 3	-6.70285	6.8008e-06
643529	NR_038382	LINC00865	long intergenic non-protein coding RNA 865	44.2267	9.58604e-05	6909	NM_005994	TBX2	T-box 2	-6.69208	0.000342769
284110	NM_178171	GSDMA	gasdermin A	44.1342	6.39016e-07	7102	NM_004615	TSPAN7	tetraspanin 7	-6.66754	0.00323277
285231	NM_001159927,NM_001159929,NM_207102	FBXW12	F-box and WD repeat domain containing 12	44.0059	1.21698e-06	552889	NM_001136262	ATXN7L3B	ataxin 7 like 3B	-6.66381	4.12307e-05
442213	NM_001013732,NM_207499	PTCHD4	patched domain containing 4	43.9918	1.56744e-06	1717	NM_001163817,NM_001360	DHCR7	7-dehydrocholesterol reductase	-6.64943	0.000202888
653677	NR_004401	SEC1P	secretory blood group 1, pseudogene	43.9019	3.40235e-08	150776	NR_026922	LOC150776	sphingomyelin phosphodiesterase 4, neutral membrane (neutral sphingomyelinase-3) pseudogene	-6.64824	7.41909e-05
441666	NR_024380	LOC441666	zinc finger protein 91 pseudogene	43.4157	5.91543e-05	100129917	NR_036511,NR_036512	LOC100129917	uncharacterized LOC100129917	-6.64812	0.00303937
113835	NM_001316996,NM_001316997,NM_001316998,NM_033468	ZNF257	zinc finger protein 257	43.3856	3.36576e-06	10076	NM_001195001,NM_005704,NM_133177,NM_133178	PTPRU	protein tyrosine phosphatase, receptor type U	-6.64028	3.5692e-06
100463285	NM_001190476	MTRNR2L4	MT-RNR2-like 4	43.2105	0.000340761	2752	NM_001033044,NM_001033056,NM_002065	GLUL	glutamate-ammonia ligase	-6.63714	0.000108158
3782	NM_001204087,NM_002249,NM_170782	KCNN3	potassium calcium-activated channel subfamily N member 3	43.1453	2.94643e-07	5589	NM_001001329,NM_001289102,NM_001289103,NM_001289104,NM_002743	PRKCSH	protein kinase C substrate 80K-H	-6.63531	0.000478712
3250	NM_020995	HPR	haptoglobin-related protein	43.1329	3.58537e-07	5095	NM_000282,NM_001127692,NM_001178004	PCCA	propionyl-CoA carboxylase alpha subunit	-6.62284	6.19545e-05
54756	NM_001318864,NM_017563	IL17RD	interleukin 17 receptor D	43.0855	8.40487e-08	148523	NM_001300838,NM_001300839,NM_001300840,NM_001300841,NM_144697	CIART	circadian associated repressor of transcription	-6.61805	0.00710773
342892	NM_001193552,NM_001267779	ZNF850	zinc finger protein 850	42.7317	9.85509e-07	501	NM_001182,NM_001201377,NM_001202404	ALDH7A1	aldehyde dehydrogenase 7 family member A1	-6.58846	7.32225e-06
136332	NM_144648	LRGUK	leucine-rich repeats and guanylate kinase domain containing	42.7281	3.70342e-06	55083	NM_018012	KIF26B	kinesin family member 26B	-6.56923	8.71703e-05
116986	NM_001122772,NM_014770	AGAP2	ArfGAP with GTPase domain, ankyrin repeat and PH domain 2	42.5667	9.5051e-06	2053	NM_001256482,NM_001256483,NM_001256484,NM_001979	EPHX2	epoxide hydrolase 2	-6.56236	4.23275e-06
162514	NM_001258205,NM_145068	TRPV3	transient receptor potential cation channel subfamily V member 3	42.1158	3.83239e-06	3621	NM_001267728,NM_005537,NM_198217,NM_198218,NM_198219	ING1	inhibitor of growth family member 1	-6.56022	0.00156023
400746	NM_001010980	NCMAP	non-compact myelin associated protein	42.0625	2.00792e-07	1780	NM_001135556,NM_001135557,NM_001278421,NM_001278422,NM_004411	DYNC1I1	dynein cytoplasmic 1 intermediate chain 1	-6.54876	0.000293928
4625	NM_000257	MYH7	myosin, heavy chain 7, cardiac muscle, beta	41.935	5.86738e-08	3866	NM_002275	KRT15	keratin 15	-6.54155	0.0407954
100190940	NR_024457	LOC100190940	uncharacterized LOC100190940	41.9262	9.78055e-06	10794	NM_006635	ZNF460	zinc finger protein 460	-6.50527	0.00298573
728175	NR_040108	LOC728175	uncharacterized LOC728175	41.8752	1.85362e-08	64132	NM_022167,NR_110010	XYLT2	xylosyltransferase 2	-6.50317	0.000619408
30817	NM_001271052,NM_013447	ADGRE2	adhesion G protein-coupled receptor E2	41.622	3.39298e-06	23371	NM_015319,NM_170754,NM_198316	TNS2	tensin 2	-6.48931	0.000192812
27094	NM_001163677,NM_014407,NM_171828,NM_171829,NM_171830,NR_028135	KCNMB3	potassium calcium-activated channel subfamily M regulatory beta subunit 3	41.4699	1.74437e-06	55616	NM_001143778,NM_017707	ASAP3	ArfGAP with SH3 domain, ankyrin repeat and PH domain 3	-6.48567	0.000705865
79689	NM_001205315,NM_001205316,NM_024636	STEAP4	STEAP4 metalloreductase	41.3623	0.000290335	2023	NM_001201483,NM_001428	ENO1	enolase 1	-6.48334	0.000131932
3108	NM_006120	HLA-DMA	major histocompatibility complex, class II, DM alpha	41.3606	6.59871e-06	10585	NM_001077365,NM_001077366,NM_001136113,NM_001136114,NM_007171	POMT1	protein O-mannosyltransferase 1	-6.47334	2.34403e-05
6506	NM_001195728,NM_001252652,NM_004171	SLC1A2	solute carrier family 1 member 2	41.1992	1.21679e-08	57805	NM_021174,NR_033902	CCAR2	cell cycle and apoptosis regulator 2	-6.44657	0.00234405
146754	NM_001303270,NM_020877	DNAH2	dynein axonemal heavy chain 2	41.1818	1.1254e-09	8237	NM_004651	USP11	ubiquitin specific peptidase 11	-6.44208	2.65053e-05
494551	NM_001105558	WEE2	WEE1 homolog 2 (S. pombe)	41.1628	4.83249e-08	155066	NM_001100592,NM_001289990,NM_145230,NR_110612	ATP6V0E2	ATPase H+ transporting V0 subunit e2	-6.43731	2.58472e-06
100885795	NR_048543	LARS2-AS1	LARS2 antisense RNA 1	41.0362	7.4536e-07	29978	NM_013444	UBQLN2	ubiquilin 2	-6.43108	6.33953e-05
165100	NM_152614	C2orf57	chromosome 2 open reading frame 57	40.8735	9.36902e-07	7922	NM_001077516,NM_001288777,NM_006979	SLC39A7	solute carrier family 39 member 7	-6.41715	6.3303e-06
646324	NR_037195	LINC00607	long intergenic non-protein coding RNA 607	40.8115	2.15647e-06	57475	NM_020715	PLEKHH1	pleckstrin homology, MyTH4 and FERM domain containing H1	-6.40978	0.00477465
2212	NM_001136219,NM_021642	FCGR2A	Fc fragment of IgG receptor IIa	40.7957	6.19614e-05	5976	NM_001297549,NM_002911	UPF1	UPF1, RNA helicase and ATPase	-6.37394	0.000208637
107303344	NM_001320727,NR_135324	SETDB2-PHF11	SETDB2-PHF11 readthrough	40.6283	0.000312438	286204	NM_173689,NR_104603	CRB2	crumbs 2, cell polarity complex component	-6.3723	0.000660988
80000	NM_001142966	GREB1L	growth regulation by estrogen in breast cancer-like	40.6034	2.2996e-06	57484	NM_020724	RNF150	ring finger protein 150	-6.34851	0.00102663
4033	NM_001204126,NM_001204127,NM_006152	LRMP	lymphoid restricted membrane protein	40.2612	9.3624e-05	8050	NM_001135024,NM_001166158,NM_003477	PDHX	pyruvate dehydrogenase complex component X	-6.32644	7.09844e-05
283507	NR_003365	SUGT1P3	SGT1 homolog, MIS12 kinetochore complex assembly cochaperone pseudogene 3	40.1792	0.000166139	8541	NM_003660,NR_103842	PPFIA3	PTPRF interacting protein alpha 3	-6.32198	0.00112415
101929165	NR_134476	LOC101929165	uncharacterized LOC101929165	40.0836	1.32858e-05	79885	NM_001136041,NM_024827	HDAC11	histone deacetylase 11	-6.32149	0.000700664
90993	NM_052854	CREB3L1	cAMP responsive element binding protein 3-like 1	40.0836	2.32194e-07	55902	NM_001076552,NM_001242393,NM_018677	ACSS2	acyl-CoA synthetase short-chain family member 2	-6.31851	0.00342336
222967	NM_173565	RSPH10B	radial spoke head 10 homolog B	40.074	2.45293e-06	5430	NM_000937	POLR2A	polymerase (RNA) II subunit A	-6.30673	1.83491e-05
407975	NR_027349,NR_027350	MIR17HG	miR-17-92a-1 cluster host gene	39.8851	3.47746e-08	23171	NM_015141	GPD1L	glycerol-3-phosphate dehydrogenase 1-like	-6.26008	0.00231637
2528	NM_000150,NM_001040701	FUT6	fucosyltransferase 6	39.7367	5.24105e-08	158471	NM_001308047,NM_001308048,NM_001308049,NM_001308050,NM_001308051,NM_015225,NR_131751	PRUNE2	prune homolog 2 (Drosophila)	-6.25761	0.000521372
643911	NM_001308963,NR_034105,NR_034106,NR_110453,NR_110454	CRNDE	colorectal neoplasia differentially expressed (non-protein coding)	39.6232	3.70007e-08	55157	NM_018122	DARS2	aspartyl-tRNA synthetase 2, mitochondrial	-6.2572	0.000450375
100132463	NM_001185149	CLDN24	claudin 24	39.5548	5.92701e-05	114881	NM_145798	OSBPL7	oxysterol binding protein like 7	-6.25612	0.000479293
100128288	NR_024447	LOC100128288	uncharacterized LOC100128288	39.4465	9.97136e-05	79137	NM_001321109,NM_001321110,NM_024293	FAM134A	family with sequence similarity 134 member A	-6.25442	7.43748e-06
861	NM_001001890,NM_001122607,NM_001754	RUNX1	runt related transcription factor 1	39.3794	1.52971e-08	3728	NM_002230,NM_021991	JUP	junction plakoglobin	-6.2487	0.00034001
1235	NM_004367,NM_031409	CCR6	C-C motif chemokine receptor 6	39.332	1.55895e-05	2086	NM_001007253	ERV3-1	endogenous retrovirus group 3 member 1	-6.24765	0.000294162
166752	NM_001168235	FREM3	FRAS1 related extracellular matrix 3	39.2661	1.14666e-07	4926	NM_001286561,NM_006185,NR_104476	NUMA1	nuclear mitotic apparatus protein 1	-6.24064	3.90662e-05
6542	NM_001008539,NM_001164771,NM_003046	SLC7A2	solute carrier family 7 member 2	39.1689	2.70157e-05	6786	NM_001277961,NM_001277962,NM_003156	STIM1	stromal interaction molecule 1	-6.23327	5.4868e-05
6519	NM_000341	SLC3A1	solute carrier family 3 member 1	39.1028	0.000221152	3099	NM_000189	HK2	hexokinase 2	-6.23191	0.000563924
5265	NM_000295,NM_001002235,NM_001002236,NM_001127700,NM_001127701,NM_001127702,NM_001127703,NM_001127704,NM_001127705,NM_001127706,NM_001127707	SERPINA1	serpin family A member 1	39.1002	1.43601e-05	2817	NM_002081	GPC1	glypican 1	-6.22503	0.000691291
57578	NM_020818	UNC79	unc-79 homolog (C. elegans)	38.8542	5.50251e-09	84466	NM_001256545,NM_001308119,NM_001308121,NM_032446	MEGF10	multiple EGF like domains 10	-6.21371	4.59049e-05
619190	NR_003262	FDPSP2	farnesyl diphosphate synthase pseudogene 2	38.7316	3.2134e-08	9843	NM_001130860,NM_001282141,NM_014799,NM_138737	HEPH	hephaestin	-6.19913	1.59714e-05
387103	NM_001012507,NM_001286524,NM_001286525,NR_104462	CENPW	centromere protein W	38.6101	1.40082e-05	55890	NM_018653,NM_022036	GPRC5C	G protein-coupled receptor class C group 5 member C	-6.15299	0.000487538
103611157	NR_125715	TGFB2-OT1	TGFB2 overlapping transcript 1	38.5909	0.000371743	84952	NM_001252335,NM_032866	CGNL1	cingulin-like 1	-6.14365	3.65336e-05
100506551	NR_103809	LOC100506551	uncharacterized LOC100506551	38.5339	1.74907e-05	506	NM_001686	ATP5B	ATP synthase, H+ transporting, mitochondrial F1 complex, beta polypeptide	-6.13646	4.50878e-05
145773	NM_152450	FAM81A	family with sequence similarity 81 member A	38.5165	1.69185e-05	1649	NM_001195053,NM_001195054,NM_001195055,NM_001195056,NM_001195057,NM_004083	DDIT3	DNA damage inducible transcript 3	-6.12398	9.08309e-05
11223	NM_001271733	MST1L	macrophage stimulating 1-like	38.4532	3.06791e-06	23530	NM_012343,NM_182977	NNT	nicotinamide nucleotide transhydrogenase	-6.10587	5.39908e-05
390067	NM_001005289	OR52H1	olfactory receptor family 52 subfamily H member 1	38.3393	3.82588e-07	1981	NM_001194946,NM_001194947,NM_001291157,NM_004953,NM_182917,NM_198241,NM_198242,NM_198244	EIF4G1	eukaryotic translation initiation factor 4 gamma 1	-6.08984	0.000283153
160287	NM_001144071,NM_144972	LDHAL6A	lactate dehydrogenase A like 6A	38.2343	7.13226e-06	23300	NM_001300728,NM_015251	ATMIN	ATM interactor	-6.08252	2.46309e-05
154075	NM_001017373,NM_001258275,NM_001277185	SAMD3	sterile alpha motif domain containing 3	38.1673	1.23065e-05	90987	NM_138367	ZNF251	zinc finger protein 251	-6.06017	0.00020977
4897	NM_001037132,NM_001193582,NM_001193583,NM_001193584,NM_005010	NRCAM	neuronal cell adhesion molecule	37.8753	9.70731e-07	4141	NM_004990	MARS	methionyl-tRNA synthetase	-6.03481	0.000615401
100526767	NM_001198954	RNF103-CHMP3	RNF103-CHMP3 readthrough	37.6684	0.00230367	3419	NM_005530	IDH3A	isocitrate dehydrogenase 3 (NAD(+)) alpha	-6.0338	0.000157141
54456	NM_001164104,NM_001164105,NM_001164106,NM_018995	MOV10L1	Mov10 RISC complex RNA helicase like 1	37.658	1.16226e-06	81029	NM_030775,NM_032642	WNT5B	Wnt family member 5B	-6.00869	1.36474e-05
727897	NM_002458	MUC5B	mucin 5B, oligomeric mucus/gel-forming	37.6048	6.98842e-05	6583	NM_003059	SLC22A4	solute carrier family 22 member 4	-6.00016	0.00221944
10388	NM_014258	SYCP2	synaptonemal complex protein 2	37.5185	1.03342e-07	5274	NM_001122752,NM_005025	SERPINI1	serpin family I member 1	-5.99855	0.0122074
2199	NM_001004019,NM_001165035,NM_001998	FBLN2	fibulin 2	37.2938	1.73167e-06	10444	NM_006336	ZER1	zyg-11 related cell cycle regulator	-5.99757	3.12937e-05
11074	NM_007028,NR_134870,NR_134871	TRIM31	tripartite motif containing 31	37.1596	2.68857e-05	109	NM_001320613,NM_004036	ADCY3	adenylate cyclase 3	-5.99426	0.0003499
101929607	NR_110039	LOC101929607	uncharacterized LOC101929607	36.9803	2.24156e-06	10999	NM_005094	SLC27A4	solute carrier family 27 member 4	-5.99005	0.00299688
497190	NM_001011880	CLEC18B	C-type lectin domain family 18 member B	36.9674	4.32822e-08	64651	NM_001320559,NM_001320560,NM_033027	CSRNP1	cysteine and serine rich nuclear protein 1	-5.97302	0.00282569
11191	NR_023917	PTENP1	phosphatase and tensin homolog pseudogene 1	36.9604	2.77078e-05	347735	NM_001199037,NM_001199038,NM_001199039,NM_018565,NM_178865	SERINC2	serine incorporator 2	-5.94986	2.57219e-05
27443	NM_001290046,NM_001290047	CECR2	cat eye syndrome chromosome region, candidate 2	36.9526	1.37527e-05	11180	NM_001320546,NM_001320547,NM_018031	WDR6	WD repeat domain 6	-5.93255	6.76033e-05
100169758	NR_023369	RNA5S7	RNA, 5S ribosomal 7	36.9199	2.47971e-05	84502	NM_001146028,NM_032452	JPH4	junctophilin 4	-5.92162	0.0104812
440700	NR_036683	LOC440700	carbonic anhydrase 14 pseudogene	36.9094	5.79014e-06	23254	NM_001017999,NM_001018000,NM_001018001,NM_015209,NM_201628	KAZN	kazrin, periplakin interacting protein	-5.91262	4.84257e-06
890	NM_001237	CCNA2	cyclin A2	36.8962	6.45736e-07	55665	NM_001077663,NM_001077664,NM_001290075,NM_001290076,NM_017920	URGCP	upregulator of cell proliferation	-5.90434	0.001022
4884	NM_002522	NPTX1	neuronal pentraxin 1	36.74	8.82855e-06	286	NM_000037,NM_001142445,NM_001142446,NM_020475,NM_020476,NM_020477,NM_020478,NM_020480	ANK1	ankyrin 1	-5.89784	7.69985e-06
4607	NM_000256	MYBPC3	myosin binding protein C, cardiac	36.7013	2.27815e-06	55224	NM_001297760,NM_001297761,NM_001297762,NM_018208	ETNK2	ethanolamine kinase 2	-5.89166	2.96833e-05
57528	NM_020768	KCTD16	potassium channel tetramerization domain containing 16	36.6038	0.000141245	164091	NM_178422	PAQR7	progestin and adipoQ receptor family member 7	-5.88656	0.00813466
84978	NM_001286490,NM_001286491,NM_001322949,NM_001322950,NM_001322951,NM_032892,NR_104455	FRMD5	FERM domain containing 5	36.5922	1.21444e-08	92162	NM_001319941,NM_203411	TMEM88	transmembrane protein 88	-5.87917	0.00388311
29887	NM_001199835,NM_001199837,NM_001199838,NM_001318198,NM_001318199,NM_013322	SNX10	sorting nexin 10	36.5329	4.35394e-05	3304	NM_005346	HSPA1B	heat shock protein family A (Hsp70) member 1B	-5.87339	0.0031454
23581	NM_012114	CASP14	caspase 14	36.4785	0.00018226	79065	NM_001077198,NM_024085,NR_104255	ATG9A	autophagy related 9A	-5.85733	7.11052e-06
59	NM_001141945,NM_001320855,NM_001613	ACTA2	actin, alpha 2, smooth muscle, aorta	36.4465	0.00041988	115123	NM_178450	MARCH3	membrane associated ring-CH-type finger 3	-5.85614	0.00572317
441089	NR_003665	CRSP8P	mediator complex subunit 27 pseudogene	36.4452	6.6278e-05	10525	NM_001130991,NM_006389	HYOU1	hypoxia up-regulated 1	-5.85453	4.66547e-06
1464	NM_001897	CSPG4	chondroitin sulfate proteoglycan 4	36.3749	3.86308e-06	5442	NM_005035	POLRMT	polymerase (RNA) mitochondrial	-5.85147	0.000270617
55545	NR_002307	MSX2P1	msh homeobox 2 pseudogene 1	36.2304	4.7728e-07	5307	NM_002653	PITX1	paired like homeodomain 1	-5.85022	7.31977e-05
56903	NM_020144	PAPOLB	poly(A) polymerase beta	36.1959	4.32375e-07	25837	NM_001308053,NM_014353	RAB26	RAB26, member RAS oncogene family	-5.84764	0.000307766
10855	NM_001098540,NM_001166498,NM_001199830,NM_006665	HPSE	heparanase	35.9965	6.03535e-07	79913	NM_024855	ACTR5	ARP5 actin-related protein 5 homolog	-5.84476	0.0010308
93649	NM_001146312,NM_153604	MYOCD	myocardin	35.9748	5.83624e-06	11188	NM_001276293,NM_001276294,NM_007184	NISCH	nischarin	-5.81913	0.00529222
7955	NR_026876	RNF217-AS1	RNF217 antisense RNA 1 (head to head)	35.9422	3.46362e-06	9630	NM_004297	GNA14	G protein subunit alpha 14	-5.81058	0.000517388
100507240	NR_039974	VWA8-AS1	VWA8 antisense RNA 1 (head to head)	35.75	1.58948e-07	8515	NM_001303040,NM_001303041,NM_003637	ITGA10	integrin subunit alpha 10	-5.79859	4.56584e-05
1306	NM_001855	COL15A1	collagen type XV alpha 1	35.5651	1.17412e-06	2648	NM_021078	KAT2A	K(lysine) acetyltransferase 2A	-5.76084	0.00457366
283446	NM_001101421	MYO1H	myosin IH	35.3678	4.07734e-06	7284	NM_003321	TUFM	Tu translation elongation factor, mitochondrial	-5.76049	2.06463e-05
375616	NM_001135914,NM_199349	KCP	kielin/chordin-like protein	35.1034	2.13187e-05	9962	NM_005116,NM_203327	SLC23A2	solute carrier family 23 member 2	-5.74946	2.45086e-05
3595	NM_001258214,NM_001258215,NM_001258216,NM_001319233,NM_001559,NR_047583,NR_047584	IL12RB2	interleukin 12 receptor subunit beta 2	35.0899	4.81941e-07	1299	NM_001853	COL9A3	collagen type IX alpha 3	-5.74821	0.00126405
221711	NM_001040274	SYCP2L	synaptonemal complex protein 2 like	34.845	8.54283e-06	4430	NM_001130158,NM_001161819,NM_012223	MYO1B	myosin IB	-5.74722	8.59437e-05
23120	NM_025153	ATP10B	ATPase phospholipid transporting 10B (putative)	34.8394	0.000108007	80823	NM_001142524,NM_001142525,NM_001142526,NM_001142527,NM_001142528,NM_001142529,NM_001142530,NM_030639	BHLHB9	basic helix-loop-helix domain containing, class B, 9	-5.73183	0.000998208
2122	NM_001105077,NM_001105078,NM_001163999,NM_001164000,NM_001205194,NM_004991,NM_005241	MECOM	MDS1 and EVI1 complex locus	34.7706	8.98651e-06	4776	NM_001136022,NM_001198965,NM_001198966,NM_001198967,NM_001288802,NM_001320043,NM_004554	NFATC4	nuclear factor of activated T-cells 4	-5.72397	0.00047179
1128	NM_000738	CHRM1	cholinergic receptor muscarinic 1	34.7371	9.57784e-07	9343	NM_001142605,NM_001258353,NM_001258354,NM_004247	EFTUD2	elongation factor Tu GTP binding domain containing 2	-5.70151	0.00014223
58538	NM_033066	MPP4	membrane palmitoylated protein 4	34.393	3.35245e-06	23020	NM_014014	SNRNP200	small nuclear ribonucleoprotein U5 subunit 200	-5.70003	0.000278925
148709	NR_002929	LOC148709	actin pseudogene	34.313	1.31403e-06	29894	NM_013291	CPSF1	cleavage and polyadenylation specific factor 1	-5.69584	0.00076757
496	NM_000705	ATP4B	ATPase H+/K+ transporting beta subunit	34.268	1.51406e-07	55686	NM_018000	MREG	melanoregulin	-5.66866	0.00535918
143425	NM_175733	SYT9	synaptotagmin 9	34.1594	6.64264e-05	5315	NM_001206796,NM_001206797,NM_001206798,NM_001206799,NM_001316318,NM_002654,NM_182470,NM_182471	PKM	pyruvate kinase, muscle	-5.64646	3.47212e-05
22801	NM_001004439	ITGA11	integrin subunit alpha 11	34.1044	3.81783e-05	26993	NM_001291478,NM_014371,NR_111971	AKAP8L	A-kinase anchoring protein 8 like	-5.64356	0.00120853
100533955	NR_037926	SENP3-EIF4A1	SENP3-EIF4A1 readthrough (NMD candidate)	34.0664	1.6255e-08	1272	NM_001256063,NM_001256064,NM_001843,NM_175038	CNTN1	contactin 1	-5.64148	8.17318e-05
105377621	NR_136202	LOC105377621	uncharacterized LOC105377621	34.029	2.54914e-07	51232	NM_016441	CRIM1	cysteine rich transmembrane BMP regulator 1 (chordin-like)	-5.63584	0.000334461
100303749	NR_028474	LOC100303749	LSM3 homolog, U6 small nuclear RNA associated (S. cerevisiae) pseudogene	34.0229	0.00014352	63916	NM_001318253,NM_133171,NM_182764	ELMO2	engulfment and cell motility 2	-5.63503	0.000354332
51200	NM_001163446,NM_016352	CPA4	carboxypeptidase A4	33.9965	8.14793e-05	6490	NM_001200053,NM_001200054,NM_001320121,NM_001320122,NM_006928	PMEL	premelanosome protein	-5.62282	0.0038864
100131366	NR_033938	LINC00605	long intergenic non-protein coding RNA 605	33.9026	2.10667e-06	9709	NM_001010989,NM_001272103,NM_014685	HERPUD1	homocysteine inducible ER protein with ubiquitin like domain 1	-5.61923	0.00012556
102723775	NR_120595,NR_120596,NR_120597	LINC01315	long intergenic non-protein coding RNA 1315	33.8703	5.33024e-07	399694	NM_203349	SHC4	SHC (Src homology 2 domain containing) family member 4	-5.6185	0.0015947
102724360	NR_134912,NR_134913	LOC102724360	uncharacterized LOC102724360	33.7706	4.65342e-08	26504	NM_020184	CNNM4	cyclin and CBS domain divalent metal cation transport mediator 4	-5.61339	0.00104506
5064	NM_001040134,NM_002579	PALM	paralemmin	33.6883	4.16834e-06	1737	NM_001931	DLAT	dihydrolipoamide S-acetyltransferase	-5.59206	0.00363626
1277	NM_000088	COL1A1	collagen type I alpha 1	33.6242	3.50865e-05	130733	NM_001167959,NM_152390	TMEM178A	transmembrane protein 178A	-5.59128	0.0126553
728655	NR_004855	HULC	hepatocellular carcinoma up-regulated long non-coding RNA	33.3172	2.05912e-07	26030	NM_001308147	PLEKHG3	pleckstrin homology and RhoGEF domain containing G3	-5.58446	0.00155554
401387	NM_001161528	LRRD1	leucine-rich repeats and death domain containing 1	33.263	0.00010843	9064	NM_001297609,NM_004672	MAP3K6	mitogen-activated protein kinase kinase kinase 6	-5.5839	0.000573051
100124534	NR_003704	SNORA84	small nucleolar RNA, H/ACA box 84	33.1005	3.43343e-07	26133	NM_015638,NM_199368	TRPC4AP	transient receptor potential cation channel subfamily C member 4 associated protein	-5.57999	0.000397996
100505741	NM_001310156	SPATA1	spermatogenesis associated 1	32.9057	2.21152e-06	80728	NM_001308207,NM_001308208,NM_025251	ARHGAP39	Rho GTPase activating protein 39	-5.55019	0.00295807
3779	NM_004137	KCNMB1	potassium calcium-activated channel subfamily M regulatory beta subunit 1	32.863	6.95919e-06	25920	NM_015456	NELFB	negative elongation factor complex member B	-5.54897	0.000734202
6770	NM_000349	STAR	steroidogenic acute regulatory protein	32.8222	5.30622e-07	7593	NM_001267033,NM_003422,NM_198055	MZF1	myeloid zinc finger 1	-5.54355	9.2577e-05
7434	NM_001304522,NM_001308259,NM_003382,NR_130758	VIPR2	vasoactive intestinal peptide receptor 2	32.7361	6.03576e-06	11234	NM_007216,NM_181507,NM_181508	HPS5	HPS5, biogenesis of lysosomal organelles complex 2 subunit 2	-5.54042	0.000109306
80144	NM_001166133,NM_025074	FRAS1	Fraser extracellular matrix complex subunit 1	32.6807	2.50014e-07	64112	NM_022151	MOAP1	modulator of apoptosis 1	-5.52714	0.000567902
144453	NM_001282613,NM_001282614,NM_001282615,NM_001282616,NM_032735,NM_152439,NR_104220	BEST3	bestrophin 3	32.5894	5.50595e-06	498	NM_001001935,NM_001001937,NM_001257334,NM_001257335,NM_004046	ATP5A1	ATP synthase, H+ transporting, mitochondrial F1 complex, alpha subunit 1, cardiac muscle	-5.52399	5.64062e-05
639	NM_001198,NM_182907	PRDM1	PR domain 1	32.5566	1.18266e-07	27069	NM_014394	GHITM	growth hormone inducible transmembrane protein	-5.51973	8.73869e-05
339807	NR_034023	LOC339807	uncharacterized LOC339807	32.5065	3.59417e-06	7461	NM_003388,NM_032421	CLIP2	CAP-Gly domain containing linker protein 2	-5.51349	0.00691578
144568	NM_001282424,NM_144670	A2ML1	alpha-2-macroglobulin like 1	32.4764	1.40372e-06	7086	NM_001064,NM_001135055,NM_001258028,NR_047580	TKT	transketolase	-5.51327	0.00327902
56853	NM_001025087,NM_001025088,NM_001025089,NM_020180	CELF4	CUGBP, Elav-like family member 4	32.4753	1.4761e-07	26012	NM_001130969,NM_001130970,NM_001130971,NM_001178064,NM_015537	NSMF	NMDA receptor synaptonuclear signaling and neuronal migration factor	-5.50222	2.59162e-05
9535	NM_001301008,NM_004877	GMFG	glia maturation factor gamma	32.4257	5.75411e-05	3590	NM_001142784,NR_052010	IL11RA	interleukin 11 receptor subunit alpha	-5.50087	2.85109e-05
27127	NM_001291501,NM_148674	SMC1B	structural maintenance of chromosomes 1B	32.4043	4.77286e-06	84898	NM_001282736,NM_032812	PLXDC2	plexin domain containing 2	-5.49403	0.000625924
26996	NM_014373	GPR160	G protein-coupled receptor 160	32.0325	1.02925e-05	2535	NM_001466	FZD2	frizzled class receptor 2	-5.4812	0.0126371
171024	NM_001128933,NM_001128934,NM_001286754,NM_001286755,NM_133477	SYNPO2	synaptopodin 2	32.0302	2.74023e-06	56998	NM_001012329,NM_020248	CTNNBIP1	catenin beta interacting protein 1	-5.4795	0.000191922
491	NM_001001331,NM_001683	ATP2B2	ATPase plasma membrane Ca2+ transporting 2	31.9619	1.115e-06	10256	NM_001297647,NM_001297648,NM_006314	CNKSR1	connector enhancer of kinase suppressor of Ras 1	-5.47718	0.00412885
79825	NM_024768	EFCC1	EF-hand and coiled-coil domain containing 1	31.8918	0.00030269	10989	NM_001100169,NM_001100170,NM_006839	IMMT	inner membrane mitochondrial protein	-5.47712	0.000535318
2335	NM_001306129,NM_001306130,NM_001306131,NM_001306132,NM_002026,NM_054034,NM_212474,NM_212476,NM_212478,NM_212482	FN1	fibronectin 1	31.4649	2.27109e-06	9791	NM_001290225,NM_014754	PTDSS1	phosphatidylserine synthase 1	-5.47436	3.17928e-05
164633	NM_182527	CABP7	calcium binding protein 7	31.4497	1.92948e-05	9100	NM_001272075,NM_005153,NR_073577,NR_073578	USP10	ubiquitin specific peptidase 10	-5.47307	0.00103425
285	NM_001118887,NM_001118888,NM_001147	ANGPT2	angiopoietin 2	31.3033	2.75114e-08	55700	NM_001286365,NM_001286366,NM_018067	MAP7D1	MAP7 domain containing 1	-5.46816	0.00131519
3694	NM_000888,NM_001282353,NM_001282354,NM_001282355,NM_001282388,NM_001282389,NM_001282390	ITGB6	integrin subunit beta 6	31.1595	3.30271e-06	10207	NM_176877	PATJ	PATJ, crumbs cell polarity complex component	-5.46508	8.81071e-05
340348	NM_178562	TSPAN33	tetraspanin 33	31.0112	7.3439e-05	6095	NM_002943,NM_134260,NM_134261,NM_134262	RORA	RAR related orphan receptor A	-5.4617	0.000258656
29935	NM_013347	RPA4	replication protein A4	30.9055	1.17579e-06	25	NM_005157,NM_007313	ABL1	ABL proto-oncogene 1, non-receptor tyrosine kinase	-5.46051	0.000182319
53827	NM_001164605,NM_001320912,NM_001320913,NM_014164,NM_144779,NR_028406	FXYD5	FXYD domain containing ion transport regulator 5	30.7345	7.55246e-08	280	NM_020978	AMY2B	amylase, alpha 2B (pancreatic)	-5.45902	0.00687036
441081	NR_073404	LOC441081	POM121 membrane glycoprotein (rat) pseudogene	30.6277	4.17603e-08	126129	NM_001136052,NM_001199752,NM_001199753,NM_152359,NR_108072	CPT1C	carnitine palmitoyltransferase 1C	-5.45122	0.000550276
83990	NM_032043	BRIP1	BRCA1 interacting protein C-terminal helicase 1	30.4527	4.65426e-05	21	NM_001089	ABCA3	ATP binding cassette subfamily A member 3	-5.44437	0.000258102
51296	NM_016582,NR_027391	SLC15A3	solute carrier family 15 member 3	30.3709	1.09282e-06	55748	NM_001168499,NM_018235	CNDP2	CNDP dipeptidase 2 (metallopeptidase M20 family)	-5.44082	7.02234e-05
432369	NR_002162	ATP5EP2	ATP synthase, H+ transporting, mitochondrial F1 complex, epsilon subunit pseudogene 2	30.2315	1.48149e-05	7037	NM_001128148,NM_001313965,NM_001313966,NM_003234	TFRC	transferrin receptor	-5.44018	0.000736354
9103	NR_047648	FCGR2C	Fc fragment of IgG receptor IIc (gene/pseudogene)	30.2124	1.64826e-05	1843	NM_004417	DUSP1	dual specificity phosphatase 1	-5.43828	0.000454609
3394	NM_002163	IRF8	interferon regulatory factor 8	30.093	0.00103596	57018	NM_001308185,NM_020307	CCNL1	cyclin L1	-5.4368	0.0177707
3759	NM_000891	KCNJ2	potassium voltage-gated channel subfamily J member 2	30.0386	9.79786e-06	1140	NM_000747	CHRNB1	cholinergic receptor nicotinic beta 1 subunit	-5.42709	0.00015813
283463	NM_173600	MUC19	mucin 19, oligomeric	29.8836	2.73616e-08	7384	NM_003365	UQCRC1	ubiquinol-cytochrome c reductase core protein I	-5.42122	0.000230621
53904	NM_017433	MYO3A	myosin IIIA	29.83	2.05438e-06	114991	NM_001318040,NM_001318041,NM_001318042,NM_133374	ZNF618	zinc finger protein 618	-5.41595	7.46732e-05
9928	NM_001305792,NM_014875	KIF14	kinesin family member 14	29.8286	8.00018e-05	57544	NM_001160047,NM_020784	TXNDC16	thioredoxin domain containing 16	-5.40157	0.000363159
84868	NM_032782	HAVCR2	hepatitis A virus cellular receptor 2	29.7028	9.73035e-05	23428	NM_001267036,NM_001267037,NM_012244,NM_182728,NR_049767	SLC7A8	solute carrier family 7 member 8	-5.39625	0.000149944
153684	NR_015447	LOC153684	uncharacterized LOC153684	29.5419	1.83925e-06	54463	NM_001034850,NM_019000	FAM134B	family with sequence similarity 134 member B	-5.38551	0.000726747
90668	NM_138360	CARMIL3	capping protein regulator and myosin 1 linker 3	29.4226	5.12109e-06	6520	NM_001012662,NM_001012664,NM_001013251,NM_002394,NR_037193	SLC3A2	solute carrier family 3 member 2	-5.38405	0.000160145
92241	NM_001322923,NM_001322924,NM_052862,NR_136519	RCSD1	RCSD domain containing 1	29.3544	0.000215249	64852	NM_022830	TUT1	terminal uridylyl transferase 1, U6 snRNA-specific	-5.38063	0.000113936
84465	NM_032445	MEGF11	multiple EGF like domains 11	29.2869	3.47133e-05	7559	NM_006956,NM_016265	ZNF12	zinc finger protein 12	-5.37564	9.85679e-05
10326	NM_001083910,NM_001135844,NM_006065	SIRPB1	signal regulatory protein beta 1	29.2363	9.66158e-07	4862	NM_002518	NPAS2	neuronal PAS domain protein 2	-5.37054	0.00228092
375323	NM_198560	LHFPL4	lipoma HMGIC fusion partner-like 4	29.1805	1.49856e-06	27125	NM_014423	AFF4	AF4/FMR2 family member 4	-5.36827	0.000128811
100134015	NR_038395	UBOX5-AS1	UBOX5 antisense RNA 1	29.0937	7.6987e-05	63876	NM_022062	PKNOX2	PBX/knotted 1 homeobox 2	-5.35228	0.00675629
100505912	NR_037877	LOC100505912	uncharacterized LOC100505912	29.0873	1.24443e-05	36	NM_001609	ACADSB	acyl-CoA dehydrogenase, short/branched chain	-5.35118	0.000841031
115677	NM_001039724,NM_001171631,NM_001171632,NM_052946	NOSTRIN	nitric oxide synthase trafficking	29.0733	0.000132989	267	NM_001144,NM_001323511,NM_001323512	AMFR	autocrine motility factor receptor	-5.35114	5.05629e-05
1368	NM_001005502,NM_001874,NM_198320	CPM	carboxypeptidase M	29.0639	2.03157e-06	51343	NM_001136197,NM_001136198,NM_016263	FZR1	fizzy/cell division cycle 20 related 1	-5.34099	0.000865838
5330	NM_001284297,NM_001284298,NM_001284299,NM_004573	PLCB2	phospholipase C beta 2	29.059	3.65187e-05	664	NM_004052	BNIP3	BCL2/adenovirus E1B 19kDa interacting protein 3	-5.33807	0.00104472
283460	NR_024345	HNF1A-AS1	HNF1A antisense RNA 1	28.9289	3.46873e-05	9486	NM_004854	CHST10	carbohydrate sulfotransferase 10	-5.3367	0.00752482
101928008	NR_120539	LOC101928008	uncharacterized LOC101928008	28.908	1.60827e-06	8553	NM_003670	BHLHE40	basic helix-loop-helix family member e40	-5.33587	0.00510576
64849	NM_001011554,NM_001193339,NM_001193340,NM_001193342,NM_022829	SLC13A3	solute carrier family 13 member 3	28.8156	3.79307e-07	9369	NM_001105250,NM_001272020,NM_004796,NM_138970,NR_073546,NR_073547	NRXN3	neurexin 3	-5.32826	0.00395939
5655	NM_001077500,NM_002776,NM_145888	KLK10	kallikrein related peptidase 10	28.7177	5.17249e-06	124565	NM_001037984,NM_138570	SLC38A10	solute carrier family 38 member 10	-5.32816	0.000158502
64129	NM_001204414,NM_001204415,NM_022164	TINAGL1	tubulointerstitial nephritis antigen like 1	28.5696	0.00042725	56243	NM_001098500,NM_001282767,NM_001282768,NM_001282769,NM_001282770,NM_001321681,NM_019590	KIAA1217	KIAA1217	-5.32735	5.35988e-05
3689	NM_000211,NM_001127491,NM_001303238	ITGB2	integrin subunit beta 2	28.5205	3.58461e-05	84923	NM_001098832,NM_001289410,NM_001289411,NM_001289412,NM_032837	FAM104A	family with sequence similarity 104 member A	-5.32219	9.63679e-05
1634	NM_001920,NM_133503,NM_133504,NM_133505,NM_133506,NM_133507	DCN	decorin	28.4655	0.00035863	2068	NM_000400,NM_001130867	ERCC2	excision repair cross-complementation group 2	-5.30747	0.0024337
285313	NM_001178145,NM_001178146,NM_178822	IGSF10	immunoglobulin superfamily member 10	28.4454	1.93518e-05	83746	NM_031488	L3MBTL2	L3MBTL2 polycomb repressive complex 1 subunit	-5.29329	0.0012445
146177	NM_173615	VWA3A	von Willebrand factor A domain containing 3A	28.4243	8.43732e-06	79656	NM_001302082,NM_024603	BEND5	BEN domain containing 5	-5.28194	0.000427369
285382	NM_001025266	C3orf70	chromosome 3 open reading frame 70	28.3578	1.16351e-05	5580	NM_001316327,NM_006254,NM_212539	PRKCD	protein kinase C delta	-5.26884	0.000614126
3760	NM_001260508,NM_001260509,NM_001260510,NM_002239	KCNJ3	potassium voltage-gated channel subfamily J member 3	28.3124	0.000219494	6560	NM_001145961,NM_001145962,NM_001145963,NM_001145964,NM_005072	SLC12A4	solute carrier family 12 member 4	-5.26793	0.000418283
3123	NM_002124	HLA-DRB1	major histocompatibility complex, class II, DR beta 1	28.3027	0.00057214	95	NM_000666,NM_001198895,NM_001198896,NM_001198897,NM_001198898	ACY1	aminoacylase 1	-5.26153	0.000125033
25833	NM_001244682,NM_014352	POU2F3	POU class 2 homeobox 3	28.2554	2.44989e-06	440584	NR_033967	SLC2A1-AS1	SLC2A1 antisense RNA 1	-5.247	0.00309716
646405	NR_026730	TPTE2P1	transmembrane phosphoinositide 3-phosphatase and tensin homolog 2 pseudogene 1	28.2547	6.51885e-07	57498	NM_020738	KIDINS220	kinase D-interacting substrate 220kDa	-5.23953	3.55804e-05
1520	NM_001199739,NM_004079	CTSS	cathepsin S	28.2011	0.000187269	23705	NM_001098517,NM_001301043,NM_001301044,NM_001301045,NM_014333	CADM1	cell adhesion molecule 1	-5.23065	0.00331244
2282	NR_024162	FKBP1AP1	FK506 binding protein 1A pseudogene 1	28.1991	1.17418e-06	1408	NM_001127457,NM_021117	CRY2	cryptochrome circadian clock 2	-5.22898	0.00590098
3113	NM_001242524,NM_001242525,NM_033554	HLA-DPA1	major histocompatibility complex, class II, DP alpha 1	28.1843	0.000128189	4723	NM_001166102,NM_007103	NDUFV1	NADH dehydrogenase (ubiquinone) flavoprotein 1, 51kDa	-5.22251	5.52163e-05
101926933	NR_110002	LOC101926933	uncharacterized LOC101926933	28.1285	4.08208e-06	79837	NM_001146258,NM_001146259,NM_001146260,NM_024779	PIP4K2C	phosphatidylinositol-5-phosphate 4-kinase type 2 gamma	-5.21268	0.000297256
253738	NM_001005463	EBF3	early B-cell factor 3	28.1251	4.62153e-06	2806	NM_001286220,NM_002080	GOT2	glutamic-oxaloacetic transaminase 2	-5.20445	0.000159058
4148	NM_002381	MATN3	matrilin 3	28.0478	0.000314166	113655	NM_138431,NR_130120	MFSD3	major facilitator superfamily domain containing 3	-5.19382	0.00102395
7294	NM_003328	TXK	TXK tyrosine kinase	28.0309	1.58367e-07	84641	NM_032558	MFSD14B	major facilitator superfamily domain containing 14B	-5.1915	0.000422196
377630	NM_201402	USP17L2	ubiquitin specific peptidase 17-like family member 2	27.89	3.72401e-06	3280	NM_005524	HES1	hes family bHLH transcription factor 1	-5.19084	0.00310274
100874322	NR_046564	BACH1-IT2	BACH1 intronic transcript 2	27.8479	2.41587e-05	54583	NM_022051	EGLN1	egl-9 family hypoxia inducible factor 1	-5.19067	0.000255289
25812	NR_024591	POM121L1P	POM121 transmembrane nucleoporin like 1, pseudogene	27.8417	4.24034e-05	140612	NM_001308440,NM_020828	ZFP28	ZFP28 zinc finger protein	-5.19004	0.00595011
27039	NM_001258448,NM_001258449,NM_001300921,NM_014386	PKD2L2	polycystin 2 like 2, transient receptor potential cation channel	27.7682	9.32574e-06	3191	NM_001005335,NM_001533	HNRNPL	heterogeneous nuclear ribonucleoprotein L	-5.18729	8.05671e-05
54549	NM_001144952	SDK2	sidekick cell adhesion molecule 2	27.7384	3.42209e-07	106635534	NR_132784	SNORA104	small nucleolar RNA, H/ACA box 104	-5.18347	0.000881494
1259	NM_000087,NM_001142564	CNGA1	cyclic nucleotide gated channel alpha 1	27.7015	0.000101485	84807	NM_001321831,NM_139239	NFKBID	NFKB inhibitor delta	-5.17099	0.000708318
10265	NM_001252197,NM_005853	IRX5	iroquois homeobox 5	27.6832	0.000168825	5604	NM_002755	MAP2K1	mitogen-activated protein kinase kinase 1	-5.15518	7.32882e-05
4257	NM_001260511,NM_001260512,NM_001267598,NM_020300,NM_145764,NM_145791,NM_145792,NR_048545,NR_048547	MGST1	microsomal glutathione S-transferase 1	27.653	1.25046e-06	93185	NM_001206665,NM_001320247,NM_052868	IGSF8	immunoglobulin superfamily member 8	-5.1457	3.55487e-05
6850	NM_001135052,NM_001174167,NM_001174168,NM_003177	SYK	spleen tyrosine kinase	27.5352	1.31801e-05	1728	NM_000903,NM_001025433,NM_001025434,NM_001286137	NQO1	NAD(P)H quinone dehydrogenase 1	-5.13735	0.0269797
402176	NR_027153	RPL21P44	ribosomal protein L21 pseudogene 44	27.4289	7.3464e-07	6812	NM_001032221,NM_003165	STXBP1	syntaxin binding protein 1	-5.13493	4.38052e-05
51411	NM_001290007,NM_001290008,NM_001290009,NM_016293	BIN2	bridging integrator 2	27.1874	0.000184409	55852	NM_001288732,NM_001288733,NM_018469	TEX2	testis expressed 2	-5.1346	4.82138e-05
100628315	NR_038397,NR_103486	DNM3OS	DNM3 opposite strand/antisense RNA	27.1195	1.516e-06	51272	NM_001098787,NM_016526	BET1L	Bet1 golgi vesicular membrane trafficking protein like	-5.13141	8.35321e-05
57464	NM_001134336,NM_020704	STRIP2	striatin interacting protein 2	27.1012	3.39723e-05	6854	NM_003178,NM_133625	SYN2	synapsin II	-5.12921	0.00748825
151648	NM_001012409,NM_001012410,NM_001012411,NM_001012412,NM_001012413,NM_001199251,NM_001199252,NM_001199253,NM_001199254,NM_001199255,NM_001199256,NM_001199257,NM_138484,NR_131179,NR_131180	SGO1	shugoshin 1	27.0586	1.56728e-05	2262	NM_004466	GPC5	glypican 5	-5.12761	0.000308063
56992	NM_020242	KIF15	kinesin family member 15	27.0437	2.01806e-05	202559	NM_152688	KHDRBS2	KH domain containing, RNA binding, signal transduction associated 2	-5.11987	0.00824002
57348	NM_001005367,NM_001201461,NM_020659	TTYH1	tweety family member 1	27.0317	6.66464e-06	3725	NM_002228	JUN	Jun proto-oncogene, AP-1 transcription factor subunit	-5.11482	0.00566934
83706	NM_031471,NM_178443	FERMT3	fermitin family member 3	26.8733	0.000577161	3098	NM_000188,NM_001322364,NM_001322365,NM_001322366,NM_001322367,NM_033496,NM_033497,NM_033498,NM_033500	HK1	hexokinase 1	-5.11066	0.000175881
101927124	NR_110045	LOC101927124	uncharacterized LOC101927124	26.8644	4.73674e-05	10014	NM_001015053,NM_005474	HDAC5	histone deacetylase 5	-5.1075	0.000423214
84959	NM_032873	UBASH3B	ubiquitin associated and SH3 domain containing B	26.8052	1.30028e-07	9487	NM_004278	PIGL	phosphatidylinositol glycan anchor biosynthesis class L	-5.10584	0.00164216
9699	NM_001100117,NM_001282881,NM_001282882,NM_014677	RIMS2	regulating synaptic membrane exocytosis 2	26.7556	3.03446e-05	65123	NM_023015	INTS3	integrator complex subunit 3	-5.10569	0.000696606
153572	NM_001134222,NM_033267	IRX2	iroquois homeobox 2	26.5561	4.92187e-06	29116	NM_013262	MYLIP	myosin regulatory light chain interacting protein	-5.10273	6.90323e-05
157313	NM_001317906,NM_001317907,NM_152562	CDCA2	cell division cycle associated 2	26.4933	5.1835e-05	85004	NM_001190726,NM_032918	RERG	RAS like estrogen regulated growth inhibitor	-5.10067	0.000298082
503639	NR_110526	DUXAP10	double homeobox A pseudogene 10	26.4724	3.32722e-05	5799	NM_001308267,NM_001308268,NM_002847,NM_130842,NM_130843	PTPRN2	protein tyrosine phosphatase, receptor type N2	-5.09743	0.00119102
3899	NM_001025108,NM_002285	AFF3	AF4/FMR2 family member 3	26.4234	0.000145402	10826	NM_032385	FAXDC2	fatty acid hydroxylase domain containing 2	-5.09059	0.00715483
115749	NM_001099676,NM_001170633	C12orf56	chromosome 12 open reading frame 56	26.3879	1.98927e-05	85450	NM_001272012,NM_001272013,NM_033397	ITPRIP	inositol 1,4,5-trisphosphate receptor interacting protein	-5.08601	0.0039309
1748	NM_001934,NM_138281	DLX4	distal-less homeobox 4	26.3761	2.7363e-06	80778	NM_001286769,NM_001286770,NM_030580	ZNF34	zinc finger protein 34	-5.07493	0.0107825
342372	NM_181536	PKD1L3	polycystin 1 like 3, transient receptor potential channel interacting	26.3526	2.16787e-07	3959	NM_005567	LGALS3BP	lectin, galactoside binding soluble 3 binding protein	-5.07025	0.00231301
6578	NM_005630	SLCO2A1	solute carrier organic anion transporter family member 2A1	26.273	4.35758e-06	64782	NM_022767	AEN	apoptosis enhancing nuclease	-5.06936	0.00196679
4082	NM_002356	MARCKS	myristoylated alanine rich protein kinase C substrate	26.2142	1.21051e-06	3241	NM_001258357,NM_001258358,NM_001258359,NM_002149,NM_134421	HPCAL1	hippocalcin like 1	-5.06444	0.00032154
345930	NM_001077706,NM_001195037	ECT2L	epithelial cell transforming 2 like	26.1986	2.91085e-06	92399	NM_001173512,NM_138777,NM_199177	MRRF	mitochondrial ribosome recycling factor	-5.06306	0.0147061
146850	NM_001010855,NM_001290211,NR_110865	PIK3R6	phosphoinositide-3-kinase regulatory subunit 6	26.1691	5.00623e-07	54880	NM_001123383,NM_001123384,NM_001123385,NM_017745	BCOR	BCL6 corepressor	-5.05327	0.000109188
55619	NM_001290263,NM_014689	DOCK10	dedicator of cytokinesis 10	26.0645	2.22716e-06	10766	NM_016272	TOB2	transducer of ERBB2, 2	-5.05058	0.00153244
29767	NM_001142885,NM_014548	TMOD2	tropomodulin 2	25.9637	3.58511e-06	10489	NM_006369	LRRC41	leucine rich repeat containing 41	-5.04559	0.0009225
387707	NM_001001732,NM_001159747	CC2D2B	coiled-coil and C2 domain containing 2B	25.9622	0.00016755	3434	NM_001270927,NM_001270928,NM_001270929,NM_001270930,NM_001548	IFIT1	interferon induced protein with tetratricopeptide repeats 1	-5.03114	0.000139492
6261	NM_000540,NM_001042723	RYR1	ryanodine receptor 1	25.9572	1.62612e-05	1295	NM_001850,NM_020351	COL8A1	collagen type VIII alpha 1	-5.02647	0.001353
105372383	NR_136525	LOC105372383	uncharacterized LOC105372383	25.9106	3.87435e-07	27165	NM_001280796,NM_001280797,NM_001280798,NM_013267	GLS2	glutaminase 2	-5.02453	0.000436085
101928053	NR_120540	LOC101928053	uncharacterized LOC101928053	25.9024	8.3143e-06	9703	NM_014680	KIAA0100	KIAA0100	-5.01677	0.000875371
101927380	NR_121183	C9orf41-AS1	C9orf41 antisense RNA 1	25.8985	0.00218322	169200	NM_001008495,NM_001146273	TMEM64	transmembrane protein 64	-5.00638	0.00621148
283659	NM_173814	PRTG	protogenin	25.8815	0.000579531	9423	NM_004822	NTN1	netrin 1	-4.99996	0.000318893
9508	NM_014243	ADAMTS3	ADAM metallopeptidase with thrombospondin type 1 motif 3	25.8656	1.69772e-07	4684	NM_000615,NM_001076682,NM_001242607,NM_001242608,NM_181351	NCAM1	neural cell adhesion molecule 1	-4.99516	0.000279129
3587	NM_001558,NR_026691	IL10RA	interleukin 10 receptor subunit alpha	25.7878	8.88887e-05	2956	NM_000179,NM_001281492,NM_001281493,NM_001281494	MSH6	mutS homolog 6	-4.9916	0.00122524
644285	NR_130929	LOC644285	uncharacterized LOC644285	25.7722	2.50121e-06	117143	NM_053053	TADA1	transcriptional adaptor 1	-4.98827	0.0011682
414062	NM_001001437	CCL3L3	C-C motif chemokine ligand 3 like 3	25.7255	4.86856e-06	5905	NM_001278651,NM_001317930,NM_002883	RANGAP1	Ran GTPase activating protein 1	-4.984	0.000306628
2984	NM_004963	GUCY2C	guanylate cyclase 2C	25.6228	3.87872e-05	54882	NM_001197030,NM_017747,NM_017978,NM_024668	ANKHD1	ankyrin repeat and KH domain containing 1	-4.98385	0.00744829
100132911	NM_080750	DPH3P1	diphthamide biosynthesis 3 pseudogene 1	25.5514	6.97862e-07	9750	NM_001286445,NM_001286446,NM_001286447,NM_014722,NM_015864	FAM65B	family with sequence similarity 65 member B	-4.98247	0.00116239
51554	NM_016557,NM_178445	ACKR4	atypical chemokine receptor 4	25.5003	7.31043e-05	79990	NM_024927,NR_073573,NR_073574	PLEKHH3	pleckstrin homology, MyTH4 and FERM domain containing H3	-4.97877	0.0050064
57010	NM_001300895,NM_001300896,NM_145200	CABP4	calcium binding protein 4	25.4897	0.00131888	4130	NM_002373	MAP1A	microtubule associated protein 1A	-4.96962	0.0031303
125981	NM_133492	ACER1	alkaline ceramidase 1	25.4713	1.33984e-06	5447	NM_000941	POR	cytochrome p450 oxidoreductase	-4.96478	0.00306842
7038	NM_003235	TG	thyroglobulin	25.3851	2.56714e-07	5547	NM_001319214,NM_005040,NM_199418	PRCP	prolylcarboxypeptidase	-4.95907	0.000343417
11096	NM_007038	ADAMTS5	ADAM metallopeptidase with thrombospondin type 1 motif 5	25.3193	1.01056e-05	100507437	NR_125384,NR_125385	LOC100507437	uncharacterized LOC100507437	-4.94565	0.0157678
29992	NM_013439,NM_178272,NM_178273	PILRA	paired immunoglobin like type 2 receptor alpha	25.2752	1.81715e-05	283298	NM_198474	OLFML1	olfactomedin like 1	-4.93881	0.00124109
100533195	NR_037915	FAM24B-CUZD1	FAM24B-CUZD1 readthrough	25.0864	1.47334e-05	51104	NM_001025780,NM_016014	ABHD17B	abhydrolase domain containing 17B	-4.92666	0.00690671
138649	NR_026868	ANKRD19P	ankyrin repeat domain 19, pseudogene	25.0589	1.56663e-07	64781	NM_022766	CERK	ceramide kinase	-4.91844	0.000188875
374955	NM_198546	SPATA21	spermatogenesis associated 21	25.0498	1.3395e-05	3911	NM_005560	LAMA5	laminin subunit alpha 5	-4.91156	0.00169611
59345	NM_021629	GNB4	G protein subunit beta 4	24.9919	2.15772e-08	9308	NM_001040280,NM_001251901,NM_004233	CD83	CD83 molecule	-4.90373	0.0187042
84660	NM_201435,NR_027918	CCDC62	coiled-coil domain containing 62	24.8684	2.47934e-06	57139	NM_001035223,NM_001161616	RGL3	ral guanine nucleotide dissociation stimulator like 3	-4.90306	0.00190217
91807	NM_001308301,NM_182493	MYLK3	myosin light chain kinase 3	24.8668	1.33506e-05	3303	NM_005345	HSPA1A	heat shock protein family A (Hsp70) member 1A	-4.88256	0.00620634
11010	NM_006851	GLIPR1	GLI pathogenesis related 1	24.8635	0.000616442	64207	NM_024496	IRF2BPL	interferon regulatory factor 2 binding protein like	-4.87065	0.00245503
100462981	NM_001190470	MTRNR2L2	MT-RNR2-like 2	24.8273	4.87187e-05	6515	NM_006931	SLC2A3	solute carrier family 2 member 3	-4.86862	0.00043425
387104	NM_001012279	SOGA3	SOGA family member 3	24.7955	1.47388e-06	1583	NM_000781,NM_001099773	CYP11A1	cytochrome P450 family 11 subfamily A member 1	-4.86797	0.000924056
260434	NM_152901	PYDC1	pyrin domain containing 1	24.7884	2.82544e-06	23500	NM_001201427,NM_015345	DAAM2	dishevelled associated activator of morphogenesis 2	-4.86729	0.00124835
26154	NM_015657,NM_173076,NR_103740	ABCA12	ATP binding cassette subfamily A member 12	24.7726	8.53125e-06	7328	NM_001202498,NM_003344,NM_182697	UBE2H	ubiquitin conjugating enzyme E2 H	-4.8637	0.000116058
951	NM_001040031,NM_001774	CD37	CD37 molecule	24.7711	0.000179871	84302	NM_001303107,NM_001303108,NM_032342	TMEM246	transmembrane protein 246	-4.86142	0.00011
645836	NM_001256871	USP17L3	ubiquitin specific peptidase 17-like family member 3	24.7472	7.36371e-06	80311	NM_030624	KLHL15	kelch like family member 15	-4.85898	0.00833675
10301	NR_002605,NR_109973,NR_109974	DLEU1	deleted in lymphocytic leukemia 1 (non-protein coding)	24.726	0.000173406	100507557	NR_038244,NR_038245,NR_038246	LOC100507557	uncharacterized LOC100507557	-4.84731	0.00256444
374987	NR_103535	NEXN-AS1	NEXN antisense RNA 1	24.575	0.000224133	60481	NM_001242828,NM_001242830,NM_001242831,NM_001301856,NM_021814	ELOVL5	ELOVL fatty acid elongase 5	-4.83448	0.00962639
54829	NM_001193335,NM_017680	ASPN	asporin	24.5566	1.05526e-05	93611	NM_001014765,NM_001304790,NM_001304791,NM_033182,NM_183412,NM_183413,NR_130909	FBXO44	F-box protein 44	-4.83048	0.00162425
11033	NM_001284308,NM_001284309,NM_001284310,NM_001284311,NM_006869	ADAP1	ArfGAP with dual PH domains 1	24.537	0.000757519	7385	NM_003366	UQCRC2	ubiquinol-cytochrome c reductase core protein II	-4.82213	7.92362e-05
4137	NM_001123066,NM_001123067,NM_001203251,NM_001203252,NM_005910,NM_016834,NM_016835,NM_016841	MAPT	microtubule associated protein tau	24.4618	4.04814e-06	55226	NM_001144030,NM_024662	NAT10	N-acetyltransferase 10	-4.78399	0.000676569
101929162	NR_120474	LOC101929162	uncharacterized LOC101929162	24.4125	1.09082e-05	10322	NM_006062	SMYD5	SMYD family member 5	-4.78214	0.000817025
64919	NM_001282237,NM_001282238,NM_022898,NM_138576	BCL11B	B-cell CLL/lymphoma 11B	24.3413	2.37841e-05	2889	NM_001304275,NM_005312,NM_198679	RAPGEF1	Rap guanine nucleotide exchange factor 1	-4.77917	8.46192e-05
648987	NR_034085,NR_034086,NR_104649,NR_104650,NR_104651	LOC648987	uncharacterized LOC648987	24.3277	4.0139e-05	84707	NM_001168399,NM_001168400,NM_001168401,NM_032621	BEX2	brain expressed X-linked 2	-4.77735	0.000587551
56969	NR_002229	RPL23AP32	ribosomal protein L23a pseudogene 32	24.2377	0.000416515	2355	NM_005253	FOSL2	FOS like 2, AP-1 trancription factor subunit	-4.77056	0.000692304
2357	NM_001193306,NM_002029	FPR1	formyl peptide receptor 1	24.2082	0.000308642	7286	NM_001126337,NM_001301317,NM_020127	TUFT1	tuftelin 1	-4.76871	0.000896018
4360	NM_002438	MRC1	mannose receptor, C type 1	24.2032	2.69293e-05	7134	NM_003280	TNNC1	troponin C1, slow skeletal and cardiac type	-4.76824	0.000586004
100874259	NR_047031	SLC25A30-AS1	SLC25A30 antisense RNA 1	24.1793	1.82904e-05	5223	NM_001317079,NM_002629	PGAM1	phosphoglycerate mutase 1	-4.7631	0.000247866
7135	NM_003281	TNNI1	troponin I1, slow skeletal type	23.9781	0.000150461	255812	NR_003264	SDHAP1	succinate dehydrogenase complex flavoprotein subunit A pseudogene 1	-4.75652	0.000272086
2312	NM_002016	FLG	filaggrin	23.8823	2.83902e-05	5635	NM_002766	PRPSAP1	phosphoribosyl pyrophosphate synthetase-associated protein 1	-4.749	0.000132261
6282	NM_005620	S100A11	S100 calcium binding protein A11	23.7767	1.74432e-08	7040	NM_000660	TGFB1	transforming growth factor, beta 1	-4.74235	0.000846469
196740	NM_001031746,NM_144984	VSTM4	V-set and transmembrane domain containing 4	23.6986	1.9681e-08	1407	NM_004075	CRY1	cryptochrome circadian clock 1	-4.74092	0.00859655
8499	NM_001220473,NM_001220474,NM_001220475,NM_001220476,NM_001220477,NM_001220478,NM_001220479,NM_001220480,NM_001282536,NM_003625	PPFIA2	PTPRF interacting protein alpha 2	23.6425	1.74407e-05	4792	NM_020529	NFKBIA	NFKB inhibitor alpha	-4.73793	0.00071817
3745	NM_004975	KCNB1	potassium voltage-gated channel subfamily B member 1	23.6308	0.000415322	8943	NM_001261826,NM_003938	AP3D1	adaptor related protein complex 3 delta 1 subunit	-4.73038	0.000667712
115361	NM_052941	GBP4	guanylate binding protein 4	23.624	9.36985e-06	84981	NR_028502,NR_028503,NR_028504,NR_028505	MIR22HG	MIR22 host gene	-4.72358	0.00443039
7253	NM_000369,NM_001018036,NM_001142626	TSHR	thyroid stimulating hormone receptor	23.6116	5.00459e-06	9776	NM_001142673,NM_001205119,NM_001205120,NM_001205121,NM_001205122,NM_014741	ATG13	autophagy related 13	-4.71656	0.000183007
100507410	NR_040018,NR_040019	C1QTNF1-AS1	C1QTNF1 antisense RNA 1	23.5762	1.08175e-05	23609	NM_001271707,NM_014160	MKRN2	makorin ring finger protein 2	-4.71527	0.0012952
142679	NM_001142314,NM_001321519,NM_080876,NR_135688	DUSP19	dual specificity phosphatase 19	23.5463	4.70453e-09	5606	NM_001316332,NM_002756,NM_145109	MAP2K3	mitogen-activated protein kinase kinase 3	-4.71506	0.00404042
100128788	NR_027274,NR_027275	SRRM2-AS1	SRRM2 antisense RNA 1	23.5302	1.80012e-05	91768	NM_001100619,NM_001256438,NM_138375,NR_023359	CABLES1	Cdk5 and Abl enzyme substrate 1	-4.71145	0.00387307
100874216	NR_046731	ZNF385D-AS1	ZNF385D antisense RNA 1	23.5003	3.33239e-06	291	NM_001151	SLC25A4	solute carrier family 25 member 4	-4.7114	0.00013919
783	NM_000724,NM_001167945,NM_201570,NM_201571,NM_201572,NM_201590,NM_201593,NM_201596,NM_201597	CACNB2	calcium voltage-gated channel auxiliary subunit beta 2	23.4915	3.38849e-07	3313	NM_004134	HSPA9	heat shock protein family A (Hsp70) member 9	-4.69895	0.0056405
10085	NM_001278642,NM_005711	EDIL3	EGF like repeats and discoidin domains 3	23.4867	0.00236278	30844	NM_139265	EHD4	EH domain containing 4	-4.69857	0.000571574
100133220	NM_001310153	GOLGA6L3	golgin A6 family-like 3	23.412	4.32242e-07	8567	NM_001135943,NM_001135944,NM_003682,NM_130470,NM_130471,NM_130472,NM_130473,NM_130474,NM_130475,NM_130476	MADD	MAP kinase activating death domain	-4.69637	6.59355e-05
229	NM_000035	ALDOB	aldolase, fructose-bisphosphate B	23.4032	1.56059e-05	160	NM_014203,NM_130787	AP2A1	adaptor related protein complex 2 alpha 1 subunit	-4.69603	0.00141533
203328	NM_001287005,NM_001287006,NM_001287007,NM_001287008,NM_145006	SUSD3	sushi domain containing 3	23.3655	0.000109493	7700	NM_003441	ZNF141	zinc finger protein 141	-4.69039	0.0226166
10257	NM_001105515,NM_001301829,NM_001301830,NM_005845	ABCC4	ATP binding cassette subfamily C member 4	23.2722	5.5095e-05	327	NM_001640	APEH	acylaminoacyl-peptide hydrolase	-4.68899	9.94509e-05
3092	NM_001243198,NM_005338	HIP1	huntingtin interacting protein 1	23.2202	9.10453e-07	54872	NM_001127178,NM_001289051,NM_001289052,NM_001289053,NM_001289055,NM_001289057,NM_017733,NR_110293	PIGG	phosphatidylinositol glycan anchor biosynthesis class G	-4.6876	0.00162543
101927751	NR_135827,NR_135828,NR_135831	LOC101927751	uncharacterized LOC101927751	23.1853	1.53667e-05	6638	NM_003097,NM_022805,NM_022806,NM_022807,NM_022808	SNRPN	small nuclear ribonucleoprotein polypeptide N	-4.68427	0.000380539
23284	NM_001322246,NM_001322402,NM_015236	ADGRL3	adhesion G protein-coupled receptor L3	23.0509	0.00156799	10497	NM_006377	UNC13B	unc-13 homolog B (C. elegans)	-4.67916	0.000346047
11113	NM_001206999,NM_007174	CIT	citron rho-interacting serine/threonine kinase	22.9968	4.47876e-07	55128	NM_001304496,NM_018073	TRIM68	tripartite motif containing 68	-4.6732	0.0171706
100506119	NR_120685,NR_120686	LINC01503	long intergenic non-protein coding RNA 1503	22.9793	5.01806e-05	143666	NR_026967	LOC143666	uncharacterized LOC143666	-4.67076	0.00604796
7456	NM_001077269,NM_003387	WIPF1	WAS/WASL interacting protein family member 1	22.9032	1.34834e-05	9221	NM_001284388,NM_001284389,NM_004741	NOLC1	nucleolar and coiled-body phosphoprotein 1	-4.66919	0.000826378
80760	NM_001001851,NM_030569,NM_032817	ITIH5	inter-alpha-trypsin inhibitor heavy chain family member 5	22.895	1.765e-05	440270	NM_001023567,NR_027410	GOLGA8B	golgin A8 family member B	-4.66292	0.00161244
4117	NM_001242385,NM_001242957,NM_005906,NR_134935,NR_134936	MAK	male germ cell associated kinase	22.8738	4.95765e-08	57758	NM_001170690,NM_020974	SCUBE2	signal peptide, CUB domain and EGF like domain containing 2	-4.65824	0.00917162
145376	NM_172365	PPP1R36	protein phosphatase 1 regulatory subunit 36	22.8188	0.000258244	22841	NM_014904	RAB11FIP2	RAB11 family interacting protein 2	-4.65767	0.00930959
135228	NM_001159587,NM_001159588,NM_133493	CD109	CD109 molecule	22.7594	0.000334675	142940	NM_139169	TRUB1	TruB pseudouridine synthase family member 1	-4.64819	0.00973548
4542	NM_012335	MYO1F	myosin IF	22.7402	0.00013007	9788	NM_001282971,NM_001282974,NM_014751	MTSS1	metastasis suppressor 1	-4.64802	0.00114659
283358	NM_173593	B4GALNT3	beta-1,4-N-acetyl-galactosaminyltransferase 3	22.6775	5.25407e-06	283820	NM_001004060,NM_173614	NOMO2	NODAL modulator 2	-4.64289	0.000111211
23415	NM_012285	KCNH4	potassium voltage-gated channel subfamily H member 4	22.5134	2.308e-05	375775	NM_001098537,NM_152286	PNPLA7	patatin like phospholipase domain containing 7	-4.64138	0.00572827
23563	NM_024533	CHST5	carbohydrate sulfotransferase 5	22.5003	6.70334e-07	8614	NM_003714	STC2	stanniocalcin 2	-4.64044	0.0260325
101928989	NR_120571	MIR4300HG	MIR4300 host gene	22.2879	4.19296e-05	51593	NM_001128852,NM_001128853,NM_001128854,NM_015908	SRRT	serrate, RNA effector molecule	-4.63812	0.00114376
4493	NM_175617	MT1E	metallothionein 1E	22.2602	6.97804e-05	57661	NM_001286581,NM_001286582,NM_001286583,NM_020901	PHRF1	PHD and ring finger domains 1	-4.6336	0.00129528
100507650	NM_001282322	RNF212B	ring finger protein 212B	22.2546	6.10475e-05	53354	NM_138316,NM_148977,NM_148978	PANK1	pantothenate kinase 1	-4.62696	0.00502083
8477	NM_003608	GPR65	G protein-coupled receptor 65	22.2262	4.36894e-05	55624	NM_001243766,NM_001290129,NM_001290130,NM_017739	POMGNT1	protein O-linked mannose N-acetylglucosaminyltransferase 1 (beta 1,2-)	-4.62266	0.000245817
196475	NR_024037	RMST	rhabdomyosarcoma 2 associated transcript (non-protein coding)	22.1778	3.96822e-05	57037	NM_020319	ANKMY2	ankyrin repeat and MYND domain containing 2	-4.61713	0.000450659
100130899	NR_039988	LOC100130899	uncharacterized LOC100130899	22.1772	0.000137254	4172	NM_001270472,NM_002388	MCM3	minichromosome maintenance complex component 3	-4.61498	7.56816e-05
4916	NM_001007156,NM_001012338,NM_001243101,NM_001320134,NM_001320135,NM_002530	NTRK3	neurotrophic receptor tyrosine kinase 3	22.0536	5.45726e-05	23223	NM_001145114,NM_001284337,NM_015179	RRP12	ribosomal RNA processing 12 homolog	-4.61327	0.000237034
6857	NM_001135805,NM_001135806,NM_001291901,NM_005639	SYT1	synaptotagmin 1	21.9641	0.000290501	8242	NM_001146702,NM_001282622,NM_004187	KDM5C	lysine demethylase 5C	-4.61228	0.0011135
218	NM_000691,NM_001135167,NM_001135168	ALDH3A1	aldehyde dehydrogenase 3 family member A1	21.8754	0.0228974	54407	NM_001307936,NM_018976	SLC38A2	solute carrier family 38 member 2	-4.60901	0.000750033
100507099	NR_103839	FRY-AS1	FRY antisense RNA 1	21.8413	0.00021544	5159	NM_002609	PDGFRB	platelet derived growth factor receptor beta	-4.60426	0.00697521
728606	NR_024259	PCAT18	prostate cancer associated transcript 18 (non-protein coding)	21.7793	1.87429e-06	9905	NM_001098509,NM_014853	SGSM2	small G protein signaling modulator 2	-4.59625	0.00235201
7076	NM_003254	TIMP1	TIMP metallopeptidase inhibitor 1	21.753	1.33569e-05	4883	NM_000908,NM_001204375,NM_001204376	NPR3	natriuretic peptide receptor 3	-4.59455	0.0169856
6348	NM_002983	CCL3	C-C motif chemokine ligand 3	21.7278	0.000441161	11163	NM_001301022,NM_001301023,NM_001301024,NM_019094,NM_199040	NUDT4	nudix hydrolase 4	-4.59292	0.000160379
64127	NM_001293557,NM_022162	NOD2	nucleotide binding oligomerization domain containing 2	21.6796	8.4997e-06	102724814	NR_110555	LOC102724814	uncharacterized LOC102724814	-4.5876	0.00467622
646982	NR_024505,NR_024506,NR_024507	LINC00598	long intergenic non-protein coding RNA 598	21.5608	2.41109e-05	7773	NM_006300	ZNF230	zinc finger protein 230	-4.57012	0.00509866
26191	NM_001193431,NM_001308297,NM_012411,NM_015967	PTPN22	protein tyrosine phosphatase, non-receptor type 22	21.556	3.00882e-06	93010	NM_145236	B3GNT7	UDP-GlcNAc:betaGal beta-1,3-N-acetylglucosaminyltransferase 7	-4.56785	0.000359398
342933	NM_001080456	ZSCAN5B	zinc finger and SCAN domain containing 5B	21.5467	6.07159e-06	3705	NM_001142593,NM_001142594,NM_014216	ITPK1	inositol-tetrakisphosphate 1-kinase	-4.5643	0.00219677
51555	NM_001256750,NM_001256751,NM_001256752,NM_001256753,NM_001256754,NM_001256755,NM_001256756,NM_016559	PEX5L	peroxisomal biogenesis factor 5-like	21.5095	2.33075e-05	9818	NM_001008564,NM_014089	NUP58	nucleoporin 58kDa	-4.55624	0.000258259
727896	NR_026659	LOC727896	cysteine and histidine rich domain containing 1 pseudogene	21.429	0.000935135	54535	NM_001105563,NM_001105564,NM_019052	CCHCR1	coiled-coil alpha-helical rod protein 1	-4.55602	0.00471354
201625	NM_001291661,NM_198564	DNAH12	dynein axonemal heavy chain 12	21.3882	8.15044e-05	113026	NM_133373	PLCD3	phospholipase C delta 3	-4.5542	0.00129144
5778	NM_001199797,NM_002832,NM_080588,NR_037663,NR_037664	PTPN7	protein tyrosine phosphatase, non-receptor type 7	21.3049	1.37079e-05	4092	NM_001190821,NM_001190822,NM_001190823,NM_005904	SMAD7	SMAD family member 7	-4.55077	0.00302432
257194	NM_173808	NEGR1	neuronal growth regulator 1	21.2985	2.13649e-06	824	NM_001146068,NM_001748	CAPN2	calpain 2	-4.54511	0.000414606
5287	NM_002646	PIK3C2B	phosphatidylinositol-4-phosphate 3-kinase catalytic subunit type 2 beta	21.2412	2.43234e-07	353322	NM_181726	ANKRD37	ankyrin repeat domain 37	-4.54147	0.00222825
149837	NR_015406	LINC00654	long intergenic non-protein coding RNA 654	21.2211	3.10449e-05	9882	NM_001286658,NM_001286659,NM_014832	TBC1D4	TBC1 domain family member 4	-4.53997	0.000607671
152831	NM_175737	KLB	klotho beta	21.1541	2.08078e-05	6692	NM_001032367,NM_003710,NM_181642	SPINT1	serine peptidase inhibitor, Kunitz type 1	-4.52866	0.00893951
3311	NR_024151	HSPA7	heat shock protein family A (Hsp70) member 7	21.1449	8.38536e-05	7957	NM_001018041,NM_005670	EPM2A	epilepsy, progressive myoclonus type 2A, Lafora disease (laforin)	-4.52355	0.00715521
100500918	NR_037424	MIR3651	microRNA 3651	21.1299	0.00106041	23087	NM_001304495,NM_171982	TRIM35	tripartite motif containing 35	-4.52191	0.00870774
9168	NM_021103	TMSB10	thymosin beta 10	21.1253	2.30581e-08	63027	NM_001286455,NM_001286456,NM_015482,NM_021945,NR_104448	SLC22A23	solute carrier family 22 member 23	-4.51494	0.0015561
641364	NR_038380	SLC7A11-AS1	SLC7A11 antisense RNA 1	21.1251	1.88559e-06	23632	NM_012113	CA14	carbonic anhydrase 14	-4.51386	0.000749621
6459	NR_033420	SH3GL1P2	SH3 domain containing GRB2 like 1 pseudogene 2	20.9804	0.000114931	54494	NM_001271562,NM_019021	C11orf71	chromosome 11 open reading frame 71	-4.51193	0.0109681
1591	NM_000782,NM_001128915	CYP24A1	cytochrome P450 family 24 subfamily A member 1	20.9735	0.00113378	6487	NM_001270459,NM_001270460,NM_001270461,NM_001270462,NM_001270463,NM_001270464,NM_001270465,NM_001270466,NM_006279,NM_174963,NM_174964,NM_174965,NM_174966,NM_174967,NM_174968,NM_174969,NM_174970,NM_174971,NR_073016,NR_073017,NR_073018,NR_073019,NR_073020,NR_073021,NR_073023	ST3GAL3	ST3 beta-galactoside alpha-2,3-sialyltransferase 3	-4.50836	0.00840126
257313	NM_198152	UTS2B	urotensin 2B	20.9461	3.53669e-06	55898	NM_001039675,NM_001323619,NM_001323620,NM_001323621,NM_018671	UNC45A	unc-45 myosin chaperone A	-4.50807	0.000961801
79905	NM_001160364,NM_001300732,NM_001324263,NM_001324265,NM_001324268,NM_024847,NR_136733	TMC7	transmembrane channel like 7	20.8013	7.43612e-05	8303	NM_003498	SNN	stannin	-4.50679	0.00792793
80339	NM_025225	PNPLA3	patatin like phospholipase domain containing 3	20.7978	5.12893e-05	10383	NM_006088	TUBB4B	tubulin beta 4B class IVb	-4.50501	0.000274741
283629	NM_001184739,NM_001308067,NM_174944	TSSK4	testis specific serine kinase 4	20.7738	5.06878e-06	2632	NM_000158	GBE1	glucan (1,4-alpha-), branching enzyme 1	-4.50367	0.00361409
222663	NM_001303136,NM_152753	SCUBE3	signal peptide, CUB domain and EGF like domain containing 3	20.7549	6.58773e-07	23232	NM_015188	TBC1D12	TBC1 domain family member 12	-4.48955	0.000524477
29931	NR_024065	LINC00312	long intergenic non-protein coding RNA 312	20.7426	9.88328e-06	79726	NM_001324171,NM_001324172,NM_030581	WDR59	WD repeat domain 59	-4.48644	0.000218334
114036	NR_027266,NR_027267	LINC00310	long intergenic non-protein coding RNA 310	20.6404	1.82947e-05	85369	NM_001270768,NM_033088,NR_073071	STRIP1	striatin interacting protein 1	-4.48583	0.000815193
162998	NM_175883	OR7D2	olfactory receptor family 7 subfamily D member 2	20.6334	0.000306675	2737	NM_000168	GLI3	GLI family zinc finger 3	-4.48515	0.000593052
25816	NM_001077654,NM_001286813,NM_001286814,NM_001286815,NM_001286817,NM_014350	TNFAIP8	TNF alpha induced protein 8	20.5848	5.54206e-06	59277	NM_021229	NTN4	netrin 4	-4.48397	0.0170687
2491	NM_001318521,NM_001318523,NM_006733	CENPI	centromere protein I	20.5497	0.000589605	4355	NM_001278370,NM_001278371,NM_001278372,NM_001278373,NM_001278374,NM_001278375,NM_001278376,NM_001278381,NM_005374	MPP2	membrane palmitoylated protein 2	-4.48363	0.00237093
145474	NR_027046	LOC145474	uncharacterized LOC145474	20.5414	5.26411e-06	7039	NM_001099691,NM_001308158,NM_001308159,NM_003236	TGFA	transforming growth factor alpha	-4.47591	0.00489107
100463486	NM_001190702	MTRNR2L8	MT-RNR2-like 8	20.524	7.62036e-05	284004	NM_173620	HEXDC	hexosaminidase D	-4.47534	0.00377452
79992	NR_024277	AGPAT4-IT1	AGPAT4 intronic transcript 1	20.5	1.69912e-06	83891	NM_001317781	SNX25	sorting nexin 25	-4.47438	0.000413372
6876	NM_001001522,NM_003186	TAGLN	transgelin	20.4968	0.000106925	64788	NM_022773,NR_033645,NR_033646,NR_036442	LMF1	lipase maturation factor 1	-4.46761	0.0113233
777	NM_000721,NM_001205293,NM_001205294	CACNA1E	calcium voltage-gated channel subunit alpha1 E	20.4352	0.000413355	80824	NM_030640	DUSP16	dual specificity phosphatase 16	-4.46569	0.00568956
246176	NM_139285	GAS2L2	growth arrest specific 2 like 2	20.3363	2.78187e-06	7574	NM_001256279,NM_001256280,NM_019591	ZNF26	zinc finger protein 26	-4.46217	0.00394032
6493	NM_005069,NM_009586	SIM2	single-minded family bHLH transcription factor 2	20.3129	5.21236e-06	51533	NM_001278221,NM_001321126,NM_001321127,NM_016483	PHF7	PHD finger protein 7	-4.45908	0.00191959
3248	NM_000860,NM_001145816,NM_001256301,NM_001256305,NM_001256306,NM_001256307	HPGD	hydroxyprostaglandin dehydrogenase 15-(NAD)	20.3042	0.00232	147798	NM_001145303,NM_144686	TMC4	transmembrane channel like 4	-4.45846	0.00357395
929	NM_000591,NM_001040021,NM_001174104,NM_001174105	CD14	CD14 molecule	20.2824	0.000300864	5786	NM_002836,NM_080840,NM_080841	PTPRA	protein tyrosine phosphatase, receptor type A	-4.45815	0.000501679
100507290	NM_001195605	ZNF865	zinc finger protein 865	20.2609	0.000609273	3005	NM_005318	H1F0	H1 histone family member 0	-4.45694	0.000907661
2900	NM_001282470,NM_001282473,NM_014619	GRIK4	glutamate ionotropic receptor kainate type subunit 4	20.2485	1.38686e-05	55260	NM_001303538,NM_001303539,NM_001303540,NM_018273,NR_130317	TMEM143	transmembrane protein 143	-4.45039	0.00890519
10344	NM_006072	CCL26	C-C motif chemokine ligand 26	20.1872	8.97091e-05	55975	NM_001031710,NM_001172428,NM_018846,NR_033328,NR_033329	KLHL7	kelch like family member 7	-4.4449	0.000487105
440193	NM_001080414	CCDC88C	coiled-coil domain containing 88C	20.0906	1.25033e-05	8450	NM_001079872,NM_003588	CUL4B	cullin 4B	-4.4429	0.000844332
730668	NR_027240	LOC730668	dynein heavy chain -like pseudogene	20.0735	0.000452429	23061	NM_015043,NM_198868	TBC1D9B	TBC1 domain family member 9B	-4.44289	0.00055912
6281	NM_002966	S100A10	S100 calcium binding protein A10	20.07	5.9378e-07	158584	NM_174912	FAAH2	fatty acid amide hydrolase 2	-4.4421	0.015092
440224	NR_024076	CXADRP3	coxsackie virus and adenovirus receptor pseudogene 3	20.0348	9.0247e-05	5230	NM_000291	PGK1	phosphoglycerate kinase 1	-4.44125	0.00166372
100506621	NR_109779	LINC01279	long intergenic non-protein coding RNA 1279	19.9908	2.49068e-08	374378	NM_198516	GALNT18	polypeptide N-acetylgalactosaminyltransferase 18	-4.44041	0.0106949
162681	NM_001288980,NM_001288981,NM_001288982,NM_173529,NR_110234	C18orf54	chromosome 18 open reading frame 54	19.9568	0.000202129	7045	NM_000358	TGFBI	transforming growth factor beta induced	-4.4379	0.00275371
283455	NM_173598	KSR2	kinase suppressor of ras 2	19.8438	5.08153e-07	29927	NM_013336	SEC61A1	Sec61 translocon alpha 1 subunit	-4.43223	0.00039932
85391	NR_003125	SNORD14E	small nucleolar RNA, C/D box 14E	19.8096	0.000172336	23064	NM_015046	SETX	senataxin	-4.43202	0.000572013
3690	NM_000212	ITGB3	integrin subunit beta 3	19.7436	7.08484e-06	2734	NM_001145666,NM_001145667,NM_012201,NR_027264,NR_027265	GLG1	golgi glycoprotein 1	-4.42899	0.000371753
5346	NM_001145311,NM_002666	PLIN1	perilipin 1	19.6685	9.97956e-06	535	NM_001130020,NM_001130021,NM_005177	ATP6V0A1	ATPase H+ transporting V0 subunit a1	-4.42811	0.000492025
100506606	NR_103860	LOC100506606	uncharacterized LOC100506606	19.6608	7.61564e-07	5128	NM_001170464,NM_002595	CDK17	cyclin-dependent kinase 17	-4.42678	0.00278788
55289	NM_001142807	ACOXL	acyl-CoA oxidase-like	19.6578	1.42961e-05	9723	NM_001178129,NM_012431	SEMA3E	semaphorin 3E	-4.42452	0.00212089
387990	NM_207377	TOMM20L	translocase of outer mitochondrial membrane 20 like	19.6567	5.84587e-05	22883	NM_001009566,NM_001302883,NM_014944	CLSTN1	calsyntenin 1	-4.41978	0.000142053
100506195	NR_038949,NR_038950	LARGE-AS1	LARGE antisense RNA 1	19.6202	6.04082e-06	4034	NM_001289934,NM_002319	LRCH4	leucine-rich repeats and calponin homology (CH) domain containing 4	-4.41515	0.00266624
7516	NM_005431	XRCC2	X-ray repair complementing defective repair in Chinese hamster cells 2	19.605	0.000205323	11176	NM_001300905,NM_013449	BAZ2A	bromodomain adjacent to zinc finger domain 2A	-4.41285	0.000625435
3762	NM_000890	KCNJ5	potassium voltage-gated channel subfamily J member 5	19.5784	6.41872e-05	9238	NM_001261834,NM_004749,NM_030900,NM_199122	TBRG4	transforming growth factor beta regulator 4	-4.41164	9.2432e-05
100506472	NR_040535	LOC100506472	uncharacterized LOC100506472	19.5645	4.3814e-05	7091	NM_001282748,NM_001282749,NM_001282753,NM_001282760,NM_007005,NR_104239	TLE4	transducin like enhancer of split 4	-4.40993	0.00054462
2736	NM_005270	GLI2	GLI family zinc finger 2	19.5637	2.24544e-06	57104	NM_020376	PNPLA2	patatin like phospholipase domain containing 2	-4.40627	0.000136115
3554	NM_000877,NM_001288706,NM_001320978,NM_001320980,NM_001320981,NM_001320982,NM_001320983,NM_001320984,NM_001320985,NM_001320986	IL1R1	interleukin 1 receptor type 1	19.5403	9.27669e-05	3383	NM_000201	ICAM1	intercellular adhesion molecule 1	-4.40531	0.0163934
5101	NM_001318372,NM_001318373,NM_001318374,NM_020403,NM_203487	PCDH9	protocadherin 9	19.5388	4.94138e-06	114823	NM_052925	LENG8	leukocyte receptor cluster (LRC) member 8	-4.40315	0.00305141
23418	NM_001193640,NM_001257965,NM_001257966,NM_201253,NR_047563,NR_047564	CRB1	crumbs 1, cell polarity complex component	19.5323	1.74891e-05	54660	NR_001281	PCDHB18P	protocadherin beta 18 pseudogene	-4.39979	0.0121191
57673	NM_001080450	BEND3	BEN domain containing 3	19.5292	5.26129e-07	91316	NR_024448	GUSBP11	glucuronidase, beta pseudogene 11	-4.39899	0.00284222
9060	NM_001015880,NM_004670	PAPSS2	3'-phosphoadenosine 5'-phosphosulfate synthase 2	19.521	1.86028e-07	220594	NR_003554	USP32P2	ubiquitin specific peptidase 32 pseudogene 2	-4.39763	0.00215862
100507117	NR_045385	ASAP1-IT2	ASAP1 intronic transcript 2	19.4825	4.61024e-06	3295	NM_000414,NM_001199291,NM_001199292,NM_001292027,NM_001292028	HSD17B4	hydroxysteroid (17-beta) dehydrogenase 4	-4.39684	0.000945149
6696	NM_000582,NM_001040058,NM_001040060,NM_001251829,NM_001251830	SPP1	secreted phosphoprotein 1	19.4542	0.0013729	23158	NM_015130	TBC1D9	TBC1 domain family member 9	-4.38921	0.00377193
51513	NM_001207035,NM_001207036,NM_001207037,NM_001207038,NM_001207039,NM_001207040,NM_001207041,NM_016135	ETV7	ETS variant 7	19.439	0.00052424	8508	NM_001202502,NM_003634	NIPSNAP1	nipsnap homolog 1 (C. elegans)	-4.38407	0.00111244
79686	NR_026779	LINC00341	long intergenic non-protein coding RNA 341	19.4081	3.17412e-06	80724	NM_001136538,NM_025247	ACAD10	acyl-CoA dehydrogenase family member 10	-4.37772	0.00306195
25849	NM_015393	PARM1	prostate androgen-regulated mucin-like protein 1	19.3936	7.84438e-05	55582	NM_001271927,NM_001271928,NM_017576	KIF27	kinesin family member 27	-4.37716	0.0005352
55509	NM_018664	BATF3	basic leucine zipper ATF-like transcription factor 3	19.3892	4.08625e-05	133121	NM_153343	ENPP6	ectonucleotide pyrophosphatase/phosphodiesterase 6	-4.37659	0.01083
5788	NM_001267798,NM_002838,NM_080921,NR_052021	PTPRC	protein tyrosine phosphatase, receptor type C	19.3684	0.000189761	55608	NM_001286721,NM_017664,NR_104586,NR_104587	ANKRD10	ankyrin repeat domain 10	-4.37368	0.00239044
79570	NM_024522	NKAIN1	Na+/K+ transporting ATPase interacting 1	19.3631	0.000173965	10908	NM_001166111,NM_001166112,NM_001166113,NM_001166114,NM_006702	PNPLA6	patatin like phospholipase domain containing 6	-4.37299	0.00411183
4440	NM_002442	MSI1	musashi RNA binding protein 1	19.3503	2.03466e-05	9129	NM_004698	PRPF3	pre-mRNA processing factor 3	-4.3648	0.000282576
972	NM_001025158,NM_001025159,NM_004355	CD74	CD74 molecule	19.3456	0.00126744	6595	NM_001289396,NM_001289397,NM_001289398,NM_001289399,NM_001289400,NM_003070,NM_139045	SMARCA2	SWI/SNF related, matrix associated, actin dependent regulator of chromatin, subfamily a, member 2	-4.36274	0.00025477
55824	NM_018440	PAG1	phosphoprotein membrane anchor with glycosphingolipid microdomains 1	19.3404	3.32129e-05	22937	NM_001320044,NM_012235	SCAP	SREBF chaperone	-4.36127	0.00130922
641467	NR_038381	TSC22D1-AS1	TSC22D1 antisense RNA 1	19.3396	2.12063e-06	54567	NM_019074	DLL4	delta-like 4 (Drosophila)	-4.35509	0.0046546
113457	NM_080386	TUBA3D	tubulin alpha 3d	19.2097	2.66757e-06	1185	NM_001256959,NM_001286,NR_046428	CLCN6	chloride voltage-gated channel 6	-4.35417	0.00152774
100874372	NR_046816	ARHGAP26-IT1	ARHGAP26 intronic transcript 1	19.1922	1.63322e-05	4976	NM_015560,NM_130831,NM_130832,NM_130833,NM_130834,NM_130835,NM_130836,NM_130837	OPA1	OPA1, mitochondrial dynamin like GTPase	-4.35372	0.0016889
677773	NR_003007	SCARNA23	small Cajal body-specific RNA 23	19.1907	0.000138716	6734	NM_001177842,NM_003139	SRPRA	SRP receptor alpha subunit	-4.35139	0.000284671
284611	NM_001010883	FAM102B	family with sequence similarity 102 member B	19.1391	0.000214722	1537	NM_001916	CYC1	cytochrome c1	-4.34879	0.000824727
55553	NM_001145811,NM_001145819,NM_017508,NM_033326	SOX6	SRY-box 6	19.133	4.42657e-05	92104	NM_152275	TTC30A	tetratricopeptide repeat domain 30A	-4.33978	0.00686273
140738	NM_183240	TMEM37	transmembrane protein 37	19.1102	1.15142e-05	84264	NM_001290137,NM_001290139,NM_001323635,NM_001323636,NM_032304	HAGHL	hydroxyacylglutathione hydrolase-like	-4.33591	0.0187633
196446	NM_182530	MYRFL	myelin regulatory factor-like	19.1096	0.000144015	10592	NM_001042550,NM_001042551,NM_001265602,NM_006444	SMC2	structural maintenance of chromosomes 2	-4.3338	0.000104298
91584	NM_001105543,NM_020911,NM_181775	PLXNA4	plexin A4	19.0687	0.000173158	2166	NM_001441	FAAH	fatty acid amide hydrolase	-4.32904	0.0381354
672	NM_007294,NM_007297,NM_007298,NM_007299,NM_007300,NR_027676	BRCA1	breast cancer 1	19.0406	3.34636e-06	2729	NM_001197115,NM_001498	GCLC	glutamate-cysteine ligase catalytic subunit	-4.32654	0.0149299
780776	NM_001079512,NM_001318873,NR_134901,NR_134902,NR_134903,NR_134904,NR_134905,NR_134906	TVP23A	trans-golgi network vesicle protein 23 homolog A	18.9722	6.5558e-05	54862	NM_017721	CC2D1A	coiled-coil and C2 domain containing 1A	-4.32606	0.000482342
79895	NM_024837,NR_073596,NR_073597,NR_073598	ATP8B4	ATPase phospholipid transporting 8B4 (putative)	18.9593	0.000244685	54496	NM_001184824,NM_001290018,NM_019023	PRMT7	protein arginine methyltransferase 7	-4.32371	0.00209347
102467073	NR_104613	HRAT5	heart tissue-associated transcript 5	18.9352	2.73952e-05	148808	NM_181644	MFSD4A	major facilitator superfamily domain containing 4A	-4.32291	0.00412365
4973	NM_001172632,NM_001172633,NM_002543	OLR1	oxidized low density lipoprotein receptor 1	18.874	0.00545399	55032	NM_017945	SLC35A5	solute carrier family 35 member A5	-4.3221	0.0069099
3778	NM_001014797,NM_001161352,NM_001161353,NM_001271518,NM_001271519,NM_001271520,NM_001271521,NM_001271522,NM_001322829,NM_001322830,NM_001322832,NM_001322835,NM_001322836,NM_001322837,NM_001322838,NM_001322839,NM_002247	KCNMA1	potassium calcium-activated channel subfamily M alpha 1	18.7657	5.65617e-05	432	NM_001197216,NM_001671	ASGR1	asialoglycoprotein receptor 1	-4.32183	0.0078602
10402	NM_001271142,NM_001271145,NM_001271146,NM_001271147,NM_001271148,NM_001323352,NM_001323353,NM_001323358,NM_001323359,NM_001323360,NM_001323362,NM_001323363,NM_001323364,NM_001323365,NM_001323366,NM_001323367,NM_001323368,NM_006100	ST3GAL6	ST3 beta-galactoside alpha-2,3-sialyltransferase 6	18.7395	0.000365051	9807	NM_001006115,NM_001242829,NM_153273	IP6K1	inositol hexakisphosphate kinase 1	-4.31319	0.00524697
79822	NM_001010000	ARHGAP28	Rho GTPase activating protein 28	18.7164	0.000252785	9463	NM_001039583,NM_001039584,NM_012407	PICK1	protein interacting with PRKCA 1	-4.30768	0.0132989
54843	NM_001162951,NM_001162952,NM_001162953,NM_001289608,NM_001289609,NM_001289610,NM_032943,NM_206929,NM_206930	SYTL2	synaptotagmin like 2	18.7045	0.000169153	25839	NM_001195139,NM_015386	COG4	component of oligomeric golgi complex 4	-4.30271	0.00188001
441094	NR_021490,NR_021491,NR_109818,NR_109819,NR_109820,NR_109821,NR_109822,NR_109823,NR_109824,NR_109825	NR2F1-AS1	NR2F1 antisense RNA 1	18.6845	0.000275092	3860	NM_002274,NM_153490	KRT13	keratin 13	-4.2995	0.028351
767	NM_001321837,NM_001321838,NM_001321839,NM_004056,NR_135821	CA8	carbonic anhydrase 8	18.6339	0.000137098	728239	NM_001098800,NM_001272061,NM_001272062,NM_001272063	MAGED4	MAGE family member D4	-4.29571	0.032052
357	NM_001320663,NM_001320664,NM_001649	SHROOM2	shroom family member 2	18.6272	6.42506e-05	622	NM_004051,NM_203314,NM_203315	BDH1	3-hydroxybutyrate dehydrogenase, type 1	-4.28721	0.0264976
100463487	NM_001190706	MTRNR2L9	MT-RNR2-like 9	18.6126	0.00356273	84812	NM_032726	PLCD4	phospholipase C delta 4	-4.28255	0.0226296
341208	NM_001098672	HEPHL1	hephaestin like 1	18.593	0.0001479	3708	NM_001099952,NM_001168272,NM_002222	ITPR1	inositol 1,4,5-trisphosphate receptor type 1	-4.27709	0.000426041
157	NM_005160	GRK3	adrenergic, beta, receptor kinase 2	18.5906	6.87267e-06	51317	NM_001101802,NM_016621	PHF21A	PHD finger protein 21A	-4.27683	0.0162067
85320	NM_032583,NM_033151,NM_145186	ABCC11	ATP binding cassette subfamily C member 11	18.5501	0.000128533	6574	NM_005415	SLC20A1	solute carrier family 20 member 1	-4.27414	0.015971
50863	NM_001048209,NM_001144058,NM_001144059,NM_016522	NTM	neurotrimin	18.4518	0.000457341	23224	NM_015180,NM_182910,NM_182913,NM_182914	SYNE2	spectrin repeat containing nuclear envelope protein 2	-4.27352	0.00182523
253559	NM_001167674,NM_001167675,NM_001256502,NM_001256503,NM_001256504,NM_001256505,NM_153184	CADM2	cell adhesion molecule 2	18.4496	6.34208e-06	54436	NM_001318480,NM_018986,NR_134639	SH3TC1	SH3 domain and tetratricopeptide repeats 1	-4.27282	0.0212014
4837	NM_006169	NNMT	nicotinamide N-methyltransferase	18.4411	1.9578e-05	2580	NM_001318134,NM_005255	GAK	cyclin G associated kinase	-4.27278	0.00701977
101927854	NR_121667	LOC101927854	uncharacterized LOC101927854	18.439	5.14094e-05	57035	NM_001321772,NM_020317,NR_135143,NR_135144,NR_135777,NR_135778,NR_135780,NR_135781,NR_135782,NR_135783,NR_135784,NR_135785,NR_135786,NR_135787,NR_135788,NR_135789,NR_135790,NR_135791,NR_135792,NR_135793	RSRP1	arginine/serine-rich protein 1	-4.26945	0.00819677
4537	YP_003024033	ND3	NADH dehydrogenase subunit 3	18.4166	0.00010324	7216	NM_001039705,NM_001271183,NM_001271184,NM_016157,NM_177556,NM_177557,NR_073148,NR_073149	TRO	trophinin	-4.26696	0.009937
57540	NM_020780	DISP3	dispatched RND transporter family member 3	18.3775	1.66954e-05	2542	NM_001164277,NM_001164278,NM_001164279,NM_001164280,NM_001467	SLC37A4	solute carrier family 37 member 4	-4.26051	0.0075534
100505716	NR_038319	LOC100505716	uncharacterized LOC100505716	18.3025	3.94616e-05	8821	NM_001101669,NM_003866	INPP4B	inositol polyphosphate-4-phosphatase type II B	-4.25843	0.00484166
100528019	NR_037651	HSPB2-C11orf52	HSPB2-C11orf52 readthrough (NMD candidate)	18.2473	9.71863e-05	9564	NM_001170714,NM_001170715,NM_001170716,NM_001170717,NM_001170718,NM_001170719,NM_001170720,NM_001170721,NM_014567	BCAR1	BCAR1, Cas family scaffolding protein	-4.25654	0.000935515
79962	NM_001304944,NM_024902	DNAJC22	DnaJ heat shock protein family (Hsp40) member C22	18.2445	0.000360027	23028	NM_001009999,NM_015013	KDM1A	lysine (K)-specific demethylase 1A	-4.25411	0.00338757
9914	NM_001286527,NM_001291454,NM_014861	ATP2C2	ATPase secretory pathway Ca2+ transporting 2	18.2251	1.83306e-06	25943	NM_001009984	C20orf194	chromosome 20 open reading frame 194	-4.25362	0.00279524
2835	NM_005288	GPR12	G protein-coupled receptor 12	18.1463	2.21944e-05	80853	NM_030647	KDM7A	lysine demethylase 7A	-4.25143	0.000926694
728402	NR_027338	TPI1P3	triosephosphate isomerase 1 pseudogene 3	18.1431	3.76955e-05	6049	NM_005977,NM_183043,NM_183044,NM_183045	RNF6	ring finger protein 6	-4.25026	0.0162478
11098	NM_001293178,NM_001293179,NM_001293180,NM_007173,NR_120591,NR_120592,NR_120593	PRSS23	protease, serine 23	18.1353	4.39556e-06	2997	NM_001161587,NM_002103,NR_027763	GYS1	glycogen synthase 1 (muscle)	-4.24973	0.0137707
57405	NM_020675	SPC25	SPC25, NDC80 kinetochore complex component	18.1051	0.00117858	4642	NM_001303279,NM_001303280,NM_015194	MYO1D	myosin ID	-4.24379	0.00697285
137902	NM_144651	PXDNL	peroxidasin like	18.0711	7.70969e-05	541565	NM_001013842,NM_001198827,NM_173686	C8orf58	chromosome 8 open reading frame 58	-4.24068	0.000395339
22806	NM_001257408,NM_001257409,NM_001257410,NM_001257411,NM_001257412,NM_001257413,NM_001257414,NM_001284514,NM_001284515,NM_001284516,NM_012481,NM_183228,NM_183229,NM_183230,NM_183231,NM_183232	IKZF3	IKAROS family zinc finger 3	18.0087	8.14056e-05	63893	NM_022066	UBE2O	ubiquitin conjugating enzyme E2 O	-4.23986	0.000412054
100422970	NR_036176	MIR1273D	microRNA 1273d	18.0059	0.000349104	57648	NM_001198972,NM_001198973,NM_020888	KIAA1522	KIAA1522	-4.23868	0.00152106
5284	NM_002644	PIGR	polymeric immunoglobulin receptor	17.9905	0.000159218	2944	NM_000561,NM_146421	GSTM1	glutathione S-transferase mu 1	-4.23734	0.00581708
26166	NM_001286692,NM_001286693,NM_015668	RGS22	regulator of G-protein signaling 22	17.9567	3.40821e-05	23339	NM_001301138,NM_015289	VPS39	VPS39, HOPS complex subunit	-4.23542	0.000379894
100463488	NM_001190708	MTRNR2L10	MT-RNR2-like 10	17.9346	0.00101585	79154	NM_024308	DHRS11	dehydrogenase/reductase (SDR family) member 11	-4.2341	0.00358835
2911	NM_001278064,NM_001278065,NM_001278066,NM_001278067	GRM1	glutamate metabotropic receptor 1	17.9324	4.79947e-05	30001	NM_014584	ERO1A	endoplasmic reticulum oxidoreductase alpha	-4.22134	0.00111877
1789	NM_001207055,NM_001207056,NM_006892,NM_175848,NM_175849,NM_175850	DNMT3B	DNA (cytosine-5-)-methyltransferase 3 beta	17.9064	0.000106765	5498	NM_000309,NM_001122764	PPOX	protoporphyrinogen oxidase	-4.21703	0.00900637
121506	NM_001300784,NM_152321	ERP27	endoplasmic reticulum protein 27	17.8502	0.00036505	23333	NM_015283	DPY19L1	dpy-19 like 1 (C. elegans)	-4.2166	0.00214636
9881	NM_014831	TRANK1	tetratricopeptide repeat and ankyrin repeat containing 1	17.8129	1.74563e-05	60528	NM_001165962,NM_018127,NM_173717	ELAC2	elaC ribonuclease Z 2	-4.21618	0.000274686
169166	NM_152628	SNX31	sorting nexin 31	17.7937	0.000114115	10120	NM_005735	ACTR1B	ARP1 actin-related protein 1 homolog B, centractin beta	-4.21578	0.00705652
348938	NM_001099287,NM_001172292	NIPAL4	NIPA like domain containing 4	17.7929	1.63664e-05	56112	NM_018916,NM_032011	PCDHGA3	protocadherin gamma subfamily A, 3	-4.21543	0.0152692
642757	NR_122047	TBC1D22A-AS1	TBC1D22A antisense RNA 1	17.7913	6.07387e-05	51318	NM_016622,NM_145644	MRPL35	mitochondrial ribosomal protein L35	-4.21518	0.00110612
389799	NM_001282957,NM_207417	CFAP77	cilia and flagella associated protein 77	17.7885	2.16405e-05	23150	NM_015123	FRMD4B	FERM domain containing 4B	-4.21435	0.000982316
618	NR_001568	BCYRN1	brain cytoplasmic RNA 1	17.7709	0.000177225	56941	NM_001006109,NM_020187	HMCES	5-hydroxymethylcytosine (hmC) binding, ES cell-specific	-4.21382	0.00252744
646023	NR_028483,NR_028484	ADORA2A-AS1	ADORA2A antisense RNA 1	17.7644	0.00013805	4123	NM_001256494,NM_001256495,NM_001256496,NM_006715	MAN2C1	mannosidase alpha class 2C member 1	-4.21263	0.0150243
4514	YP_003024032	COX3	cytochrome c oxidase subunit III	17.7395	0.00060506	912	NM_001319145,NM_001766	CD1D	CD1d molecule	-4.2123	0.017615
401105	NR_024413	FLJ42393	uncharacterized LOC401105	17.6275	5.41607e-06	37	NM_000018,NM_001033859,NM_001270447,NM_001270448	ACADVL	acyl-CoA dehydrogenase, very long chain	-4.20144	0.00325689
91977	NM_001122853,NM_133371	MYOZ3	myozenin 3	17.5576	5.08468e-05	1198	NM_001130028,NM_003992	CLK3	CDC like kinase 3	-4.1969	0.00178837
9495	NM_004857	AKAP5	A-kinase anchoring protein 5	17.5505	9.64932e-06	64744	NM_001198978,NM_001198979,NM_001198980,NM_022733	SMAP2	small ArfGAP2	-4.19661	0.00405189
9832	NM_001270934,NM_001270941,NM_001282282,NM_014790	JAKMIP2	janus kinase and microtubule interacting protein 2	17.4783	9.45894e-07	23767	NM_013281,NM_198391	FLRT3	fibronectin leucine rich transmembrane protein 3	-4.19651	0.00440452
3600	NM_000585,NM_172175,NR_037840	IL15	interleukin 15	17.4756	0.00238327	79586	NM_001195731,NM_024536	CHPF	chondroitin polymerizing factor	-4.19406	0.000384789
1573	NM_000775,NR_134981,NR_134982	CYP2J2	cytochrome P450 family 2 subfamily J member 2	17.4632	7.66334e-05	11214	NM_001270546,NM_006738,NM_007200	AKAP13	A-kinase anchoring protein 13	-4.19257	0.0010958
3026	NM_001177660,NM_004132	HABP2	hyaluronan binding protein 2	17.4588	0.000169611	23650	NM_012101	TRIM29	tripartite motif containing 29	-4.19186	0.0376934
100506334	NR_038883,NR_134558,NR_134559	LINC00649	long intergenic non-protein coding RNA 649	17.3871	5.33273e-06	89970	NM_001305163,NM_001305164,NM_001305182,NM_133368	RSPRY1	ring finger and SPRY domain containing 1	-4.18952	0.00030381
5803	NM_001206838,NM_001206839,NM_002851	PTPRZ1	protein tyrosine phosphatase, receptor type Z1	17.3867	0.000861281	4128	NM_000240,NM_001270458	MAOA	monoamine oxidase A	-4.1856	0.0112946
4622	NM_017533	MYH4	myosin, heavy chain 4, skeletal muscle	17.3853	2.72585e-05	9860	NM_001312686,NM_014813	LRIG2	leucine-rich repeats and immunoglobulin like domains 2	-4.18342	0.00667768
55137	NM_001321825,NM_018086	FIGN	fidgetin	17.3708	0.000229309	4849	NM_014516	CNOT3	CCR4-NOT transcription complex subunit 3	-4.17248	0.00966987
9201	NM_001195415,NM_001195416,NM_001195430,NM_004734	DCLK1	doublecortin like kinase 1	17.3039	0.00153939	55466	NM_001130182,NM_001130183,NM_018602	DNAJA4	DnaJ heat shock protein family (Hsp40) member A4	-4.17199	0.00130611
102723166	NR_110370	STAM-AS1	STAM antisense RNA 1 (head to head)	17.2989	7.6916e-05	65982	NM_001145542,NM_001145543,NM_001145544,NM_023926,NR_027135	ZSCAN18	zinc finger and SCAN domain containing 18	-4.17059	0.00131716
4208	NM_001131005,NM_001193347,NM_001193348,NM_001193349,NM_001193350,NM_001308002,NM_002397	MEF2C	myocyte enhancer factor 2C	17.2905	0.000246668	113	NM_001114,NM_001286057	ADCY7	adenylate cyclase 7	-4.16737	0.00553574
10875	NM_006682	FGL2	fibrinogen like 2	17.2704	3.61125e-05	10039	NM_001003931,NM_005485	PARP3	poly(ADP-ribose) polymerase family member 3	-4.16403	0.00829055
4313	NM_001127891,NM_001302508,NM_001302509,NM_001302510,NM_004530	MMP2	matrix metallopeptidase 2	17.2558	2.59088e-05	7407	NM_006295	VARS	valyl-tRNA synthetase	-4.16248	0.000533742
94025	NM_024690	MUC16	mucin 16, cell surface associated	17.2213	0.000236089	146923	NM_001321381,NM_173079	RUNDC1	RUN domain containing 1	-4.1607	0.0127316
7151	NR_002719	TOP1P1	topoisomerase (DNA) I pseudogene 1	17.1767	0.00196165	7415	NM_007126	VCP	valosin containing protein	-4.1523	0.000779466
23281	NM_001033602,NM_015233	MTUS2	microtubule associated tumor suppressor candidate 2	17.1739	9.17963e-05	64794	NM_001322340,NM_001322341,NM_001322342,NM_001322343,NM_001322344,NM_022779,NM_138620,NR_136309	DDX31	DEAD-box helicase 31	-4.1473	0.00739644
54518	NM_019043	APBB1IP	amyloid beta precursor protein binding family B member 1 interacting protein	17.1676	0.0017534	23424	NM_001302884,NM_014290	TDRD7	tudor domain containing 7	-4.14414	0.0142418
100616668	NR_038258,NR_038259	TPTE2P5	transmembrane phosphoinositide 3-phosphatase and tensin homolog 2 pseudogene 5	17.1298	8.76259e-06	5930	NM_006910,NM_018703,NM_032626	RBBP6	retinoblastoma binding protein 6	-4.14319	0.00129598
102723099	NR_130107	GHET1	gastric carcinoma proliferation enhancing transcript 1	17.1281	0.000163728	4189	NM_012328	DNAJB9	DnaJ heat shock protein family (Hsp40) member B9	-4.1427	0.00493185
221935	NM_001079653,NM_152744	SDK1	sidekick cell adhesion molecule 1	17.0563	0.000125615	163732	NM_133467	CITED4	Cbp/p300 interacting transactivator with Glu/Asp rich carboxy-terminal domain 4	-4.14259	0.00280357
8029	NM_001081	CUBN	cubilin	17.054	1.84327e-05	8412	NM_001261408,NM_001261409,NM_001261410,NM_001308251,NM_003567	BCAR3	breast cancer anti-estrogen resistance 3	-4.14215	0.0003178
1548	NM_000762	CYP2A6	cytochrome P450 family 2 subfamily A member 6	17.0526	1.23663e-05	53373	NM_001143819,NM_001301214,NM_017901	TPCN1	two pore segment channel 1	-4.14006	0.00374856
286827	NM_173084	TRIM59	tripartite motif containing 59	17.0301	4.7151e-07	6046	NM_001113182,NM_001199455,NM_001199456,NM_001291986,NM_005104	BRD2	bromodomain containing 2	-4.13978	0.0480592
56901	NM_020142	NDUFA4L2	NADH dehydrogenase (ubiquinone) 1 alpha subcomplex, 4-like 2	17.0117	0.000495514	140688	NM_001256798,NM_080616	NOL4L	nucleolar protein 4-like	-4.13776	0.00190825
160851	NM_001204504,NM_001204505,NM_001204506,NM_001297429,NM_152910,NM_178009,NR_123714,NR_123715	DGKH	diacylglycerol kinase eta	16.9038	4.04119e-06	84440	NM_001303542,NM_032932	RAB11FIP4	RAB11 family interacting protein 4	-4.12611	0.00892811
400508	NR_026675	CRYM-AS1	CRYM antisense RNA 1	16.8675	2.374e-05	79661	NM_001256552,NM_024608,NR_046311	NEIL1	nei like DNA glycosylase 1	-4.12546	0.00362018
114805	NM_001301627,NM_052917	GALNT13	polypeptide N-acetylgalactosaminyltransferase 13	16.7895	0.0102759	6665	NM_006942	SOX15	SRY-box 15	-4.1234	0.00600682
113115	NM_001099286,NM_001318738,NM_138419	MTFR2	mitochondrial fission regulator 2	16.7747	8.26123e-06	3983	NM_001003407,NM_001003408,NM_001322882,NM_001322883,NM_001322884,NM_001322885,NM_001322886,NM_001322887,NM_001322888,NM_001322889,NM_001322890,NM_001322891,NM_001322892,NM_001322893,NM_001322894,NM_001322895,NM_001322896,NM_001322897,NM_001322898,NM_001322899,NM_001322900,NM_002313,NM_006720	ABLIM1	actin binding LIM protein 1	-4.12312	0.00393836
11174	NM_197941,NR_135689	ADAMTS6	ADAM metallopeptidase with thrombospondin type 1 motif 6	16.7335	2.41924e-06	2308	NM_002015	FOXO1	forkhead box O1	-4.12141	0.00417065
100130522	NR_028339,NR_028340	PARD6G-AS1	PARD6G antisense RNA 1	16.7006	2.19033e-05	57658	NM_001143682,NM_020898,NR_026554	CALCOCO1	calcium binding and coiled-coil domain 1	-4.11573	0.00035915
101927919	NR_110854	LOC101927919	uncharacterized LOC101927919	16.6593	8.92492e-05	79611	NM_024560	ACSS3	acyl-CoA synthetase short-chain family member 3	-4.11504	0.00264915
574538	NR_033859	LOC574538	uncharacterized LOC574538	16.6459	0.00164438	57003	NM_020198	CCDC47	coiled-coil domain containing 47	-4.11314	0.00496763
148203	NR_027130	ZNF738	zinc finger protein 738	16.6294	1.66384e-08	211	NM_000688,NM_001304443,NM_001304444,NM_199166	ALAS1	5'-aminolevulinate synthase 1	-4.10976	0.00238021
55	NM_001099,NM_001134194,NM_001292037	ACPP	acid phosphatase, prostate	16.6276	0.000420952	5819	NM_001042724,NM_002856	NECTIN2	nectin cell adhesion molecule 2	-4.10233	0.00413887
126820	NM_001288563,NM_145172	WDR63	WD repeat domain 63	16.5865	2.49313e-05	23644	NM_014329	EDC4	enhancer of mRNA decapping 4	-4.10204	0.00120415
728558	NR_038444,NR_134320,NR_134321,NR_134322	ENTPD1-AS1	ENTPD1 antisense RNA 1	16.5822	0.00014793	23015	NM_181077,NR_027409	GOLGA8A	golgin A8 family member A	-4.09956	0.00236939
2147	NM_000506,NM_001311257	F2	coagulation factor II, thrombin	16.5759	4.26942e-06	5832	NM_001017423,NM_001323412,NM_001323413,NM_001323414,NM_001323415,NM_001323416,NM_001323417,NM_001323418,NM_001323419,NM_002860	ALDH18A1	aldehyde dehydrogenase 18 family member A1	-4.09778	0.00259468
642402	NR_111962	GOLGA6L17P	golgin A6 family-like 17, pseudogene	16.5699	1.43117e-06	51421	NM_001278683,NM_001278685,NM_016201	AMOTL2	angiomotin like 2	-4.09505	0.00338323
100288122	NR_040031	LDLRAD4-AS1	LDLRAD4 antisense RNA 1	16.5686	0.000108372	7556	NM_015394	ZNF10	zinc finger protein 10	-4.08968	0.0122045
101101775	NR_073455,NR_073456,NR_073457,NR_073458	TMEM220-AS1	TMEM220 antisense RNA 1	16.4863	0.000114044	23514	NM_001080394,NM_001282916,NM_001282919,NR_104581	SPIDR	scaffolding protein involved in DNA repair	-4.08381	0.000658585
100616310	NR_039793	MIR4650-1	microRNA 4650-1	16.485	0.00135884	23302	NM_015253	WSCD1	WSC domain containing 1	-4.07751	0.000952258
2124	NM_006495	EVI2B	ecotropic viral integration site 2B	16.437	0.00041834	4909	NM_006179	NTF4	neurotrophin 4	-4.07387	0.00610135
100532742	NR_037859	PIR-FIGF	PIR-FIGF readthrough	16.4292	2.70974e-05	8795	NM_003842,NM_147187,NR_027140	TNFRSF10B	tumor necrosis factor receptor superfamily member 10b	-4.07375	0.00152829
440299	NR_033787	DNM1P41	dynamin 1 pseudogene 41	16.2759	2.70529e-06	8165	NM_001242902,NM_001242903,NM_003488	AKAP1	A-kinase anchoring protein 1	-4.07116	0.0114068
23491	NM_001185176,NM_001185177,NM_024922	CES3	carboxylesterase 3	16.2081	1.51849e-05	10653	NM_001166103,NM_021102	SPINT2	serine peptidase inhibitor, Kunitz type, 2	-4.07	0.00433714
10930	NM_006789	APOBEC2	apolipoprotein B mRNA editing enzyme catalytic subunit 2	16.2057	0.000315031	7918	NM_001199237,NM_001199238,NM_001199239,NM_001199240,NM_033177	GPANK1	G-patch domain and ankyrin repeats 1	-4.06576	0.00364866
654463	NM_001039112	FER1L6	fer-1 like family member 6	16.2047	0.000454883	83700	NM_001205329,NM_032801	JAM3	junctional adhesion molecule 3	-4.06037	0.0342571
10317	NM_001278650,NM_006057,NM_033170,NM_033171,NM_033172	B3GALT5	beta-1,3-galactosyltransferase 5	16.1687	7.47446e-05	1000	NM_001308176,NM_001792	CDH2	cadherin 2	-4.05592	0.00585141
57381	NM_020663	RHOJ	ras homolog family member J	16.1644	0.00402976	65985	NM_001319839,NM_001319840,NM_023928	AACS	acetoacetyl-CoA synthetase	-4.04943	0.00144959
728927	NM_001170905,NM_001294255	ZNF736	zinc finger protein 736	16.1444	0.00120324	84919	NM_032833	PPP1R15B	protein phosphatase 1 regulatory subunit 15B	-4.04321	0.00741526
718	NM_000064	C3	complement component 3	16.1327	0.000130017	23065	NM_001271427,NM_001271428,NM_001271429,NM_015047	EMC1	ER membrane protein complex subunit 1	-4.04197	0.000544043
400128	NR_104174	TUSC8	tumor suppressor candidate 8 (non-protein coding)	16.123	0.000391497	85439	NM_001256430,NM_033104	STON2	stonin 2	-4.04192	0.000433465
257106	NM_001025598,NM_001287600,NM_001287602,NM_181720	ARHGAP30	Rho GTPase activating protein 30	16.0976	0.000159322	59084	NM_001290072,NM_001290073,NM_021572	ENPP5	ectonucleotide pyrophosphatase/phosphodiesterase 5 (putative)	-4.04092	0.00410175
647042	NM_001164465	GOLGA6L10	golgin A6 family-like 10	16.096	5.5914e-07	55718	NM_001258033,NM_001258034,NM_001258035,NM_001258036,NM_018119,NR_047581	POLR3E	polymerase (RNA) III subunit E	-4.04002	0.00107108
5141	NM_001111307,NM_001111308,NM_001111309,NM_001243121,NM_006202	PDE4A	phosphodiesterase 4A	16.0815	6.62784e-06	7021	NM_003221	TFAP2B	transcription factor AP-2 beta	-4.03935	0.00335721
9970	NM_001077469,NM_001077470,NM_001077471,NM_001077472,NM_001077473,NM_001077474,NM_001077475,NM_001077476,NM_001077477,NM_001077478,NM_001077479,NM_001077480,NM_001077481,NM_001077482,NM_005122	NR1I3	nuclear receptor subfamily 1 group I member 3	16.081	9.36826e-05	55643	NM_017797	BTBD2	BTB domain containing 2	-4.03597	0.00431574
389766	NM_001276366,NM_001276367,NM_001276368	C9orf153	chromosome 9 open reading frame 153	16.08	0.000162137	162968	NM_001207009,NM_198458	ZNF497	zinc finger protein 497	-4.03445	0.0137471
284757	NR_046099	MIR646HG	MIR646 host gene	16.071	0.000321145	3726	NM_002229	JUNB	JunB proto-oncogene, AP-1 transcription factor subunit	-4.03407	0.00976885
142685	NM_001290258,NM_080928	ASB15	ankyrin repeat and SOCS box containing 15	16.0655	0.0010541	549	NM_001306190,NM_001698	AUH	AU RNA binding protein/enoyl-CoA hydratase	-4.03243	0.0027078
113277	NM_001291586,NM_001291587,NM_001291588,NM_145041	TMEM106A	transmembrane protein 106A	16.0566	0.000333079	22824	NM_001317381,NM_001317382,NM_001317383,NM_014278	HSPA4L	heat shock protein family A (Hsp70) member 4 like	-4.03108	0.000626512
376267	NM_001308154,NM_198686	RAB15	RAB15, member RAS oncogene family	16.0493	0.00111819	23082	NM_001288727,NM_001288728,NM_015062	PPRC1	peroxisome proliferator-activated receptor gamma, coactivator-related 1	-4.02948	0.0018643
154313	NM_001031743	CFAP206	cilia and flagella associated protein 206	16.0437	0.00016215	83987	NM_032040	CCDC8	coiled-coil domain containing 8	-4.02742	0.00441126
221981	NM_015204	THSD7A	thrombospondin type 1 domain containing 7A	16.0311	8.92654e-05	56922	NM_001293273,NM_020166,NR_120639,NR_120640	MCCC1	methylcrotonoyl-CoA carboxylase 1 (alpha)	-4.02724	0.000822937
1281	NM_000090	COL3A1	collagen type III alpha 1	16.0094	0.000107976	9632	NM_004922,NM_198597	SEC24C	SEC24 homolog C, COPII coat complex component	-4.02466	0.0314174
388011	NR_015430	LINC01550	long intergenic non-protein coding RNA 1550	16.0049	0.000288334	4795	NM_001144961,NM_001144962,NM_001144963,NM_005007	NFKBIL1	NFKB inhibitor like 1	-4.0224	0.00294575
388799	NM_001013646	FAM209B	family with sequence similarity 209 member B	16.0035	3.1064e-05	9737	NM_001099410,NM_001099411,NM_001184727,NM_014710	GPRASP1	G protein-coupled receptor associated sorting protein 1	-4.02136	0.00458281
101926911	NR_110104	LOC101926911	uncharacterized LOC101926911	15.9631	0.000171524	153642	NM_198150	ARSK	arylsulfatase family member K	-4.0183	0.00327055
5122	NM_000439,NM_001177875	PCSK1	proprotein convertase subtilisin/kexin type 1	15.9561	0.000646931	93100	NM_001286829,NM_145201	NAPRT	nicotinate phosphoribosyltransferase	-4.01621	0.00319249
56311	NM_019644	ANKRD7	ankyrin repeat domain 7	15.8601	1.10894e-05	8893	NM_003907	EIF2B5	eukaryotic translation initiation factor 2B subunit epsilon	-4.01568	0.0119232
11245	NM_001271854,NM_001271855,NM_007223	GPR176	G protein-coupled receptor 176	15.8546	0.000263195	114908	NM_052932	TMEM123	transmembrane protein 123	-4.00596	0.000601489
219790	NM_001282941,NM_145307	RTKN2	rhotekin 2	15.8476	0.00195165	8216	NM_006767	LZTR1	leucine-zipper-like transcription regulator 1	-4.00499	0.0328578
202020	NR_027696,NR_027697	TAPT1-AS1	TAPT1 antisense RNA 1 (head to head)	15.8389	2.73482e-06	5834	NM_002862	PYGB	phosphorylase, glycogen; brain	-4.00492	0.00440139
64926	NM_022904	RASAL3	RAS protein activator like 3	15.7866	8.97483e-05	51015	NM_016048	ISOC1	isochorismatase domain containing 1	-3.99883	0.00642212
80094	NR_027715	BIN3-IT1	BIN3 intronic transcript 1	15.7742	2.67142e-05	5900	NM_001042368,NM_001271774,NM_001271775,NM_001271776,NM_006266	RALGDS	ral guanine nucleotide dissociation stimulator	-3.99807	0.00603525
100861549	NR_047492	LINC00562	long intergenic non-protein coding RNA 562	15.7616	2.32153e-05	119559	NM_213649,NR_110305	SFXN4	sideroflexin 4	-3.9949	0.00295603
121601	NM_001286615,NM_001286616,NM_178826	ANO4	anoctamin 4	15.7526	0.000159007	23229	NM_001173479,NM_001173480,NM_015185	ARHGEF9	Cdc42 guanine nucleotide exchange factor 9	-3.99452	0.0199654
55638	NM_001099743,NM_001099744,NM_001099745,NM_001099746,NM_001099747,NM_001099748,NM_001099749,NM_001099750,NM_001099751,NM_001099752,NM_001099753,NM_001099754,NM_001099755,NM_001099756,NM_017786	SYBU	syntabulin	15.6535	0.00108534	114822	NM_052924	RHPN1	rhophilin, Rho GTPase binding protein 1	-3.99427	0.00241508
23349	NM_001304333,NM_015297,NR_136307,NR_136308	PHF24	PHD finger protein 24	15.6333	2.04203e-05	10411	NM_001098531,NM_001098532,NM_006105	RAPGEF3	Rap guanine nucleotide exchange factor 3	-3.99188	0.0392547
8224	NM_001135774,NM_003490,NM_133633	SYN3	synapsin III	15.5841	0.00100889	90780	NM_138300	PYGO2	pygopus family PHD finger 2	-3.98618	0.00227524
4502	NM_005953	MT2A	metallothionein 2A	15.5584	8.45968e-05	5308	NM_000325,NM_001204397,NM_001204398,NM_001204399,NM_153426,NM_153427	PITX2	paired like homeodomain 2	-3.98442	0.000747694
6556	NM_000578	SLC11A1	solute carrier family 11 member 1	15.5408	0.00131714	100093631	NR_003580	GTF2IP4	general transcription factor IIi pseudogene 4	-3.98313	0.000609226
23397	NM_001281710,NM_001281711,NM_001281712,NM_015341	NCAPH	non-SMC condensin I complex subunit H	15.5342	4.18314e-05	11015	NM_006855,NM_016657	KDELR3	KDEL endoplasmic reticulum protein retention receptor 3	-3.97946	0.00065392
158326	NM_001177704,NM_144966	FREM1	FRAS1 related extracellular matrix 1	15.5255	8.554e-06	7343	NM_001076683,NM_001076684,NM_014233,NR_045058	UBTF	upstream binding transcription factor, RNA polymerase I	-3.97883	0.00365567
90381	NM_001308025,NM_152259	TICRR	TOPBP1 interacting checkpoint and replication regulator	15.5102	9.63549e-06	55218	NM_001193360,NM_001193361,NM_001193362,NM_001193363,NM_018199,NR_034164,NR_034165	EXD2	exonuclease 3'-5' domain containing 2	-3.97829	0.0179438
27145	NM_001289987,NM_001300866,NM_015687,NR_110608	FILIP1	filamin A interacting protein 1	15.5093	7.50492e-05	79594	NM_024544	MUL1	mitochondrial E3 ubiquitin protein ligase 1	-3.97783	0.0212251
375519	NM_198568	GJB7	gap junction protein beta 7	15.466	0.000297095	23200	NM_014616	ATP11B	ATPase phospholipid transporting 11B (putative)	-3.97423	0.000729217
191585	NM_182832	PLAC4	placenta specific 4	15.4643	0.0030726	1889	NM_001113347,NM_001113348,NM_001113349,NM_001397	ECE1	endothelin converting enzyme 1	-3.96849	0.0058947
84771	NR_024004,NR_024005	DDX11L2	DEAD/H-box helicase 11 like 2	15.4433	6.76564e-05	5306	NM_006224	PITPNA	phosphatidylinositol transfer protein alpha	-3.96823	0.0207512
55010	NM_001319988,NM_001319993,NM_001319994,NM_001319995,NM_001319996,NM_017915,NR_135123	PARPBP	PARP1 binding protein	15.3999	1.43203e-05	8870	NM_003897	IER3	immediate early response 3	-3.96387	0.0015477
102465907	NR_107058	MIR6862-2	microRNA 6862-2	15.3919	0.00287373	5325	NM_001080951,NM_001080952,NM_001080953,NM_001080954,NM_001080955,NM_001080956,NM_001289037,NM_001289038,NM_001289039,NM_001289040,NM_001289041,NM_001289042,NM_001289043,NM_001289044,NM_001289045,NM_001289046,NM_001289047,NM_001289048,NM_001289049,NM_001317156,NM_001317157,NM_001317158,NM_001317159,NM_001317160,NM_001317161,NM_001317162,NM_006718	PLAGL1	PLAG1 like zinc finger 1	-3.96387	0.000862319
102465520	NR_106922	MIR6862-1	microRNA 6862-1	15.3915	0.00287148	10482	NM_001081491,NM_006362	NXF1	nuclear RNA export factor 1	-3.96195	0.0150422
3018	NM_021062	HIST1H2BB	histone cluster 1, H2bb	15.3912	0.000558353	4967	NM_001003941,NM_001165036,NM_002541	OGDH	oxoglutarate dehydrogenase	-3.95984	0.00192186
100128292	NR_024585	DLG5-AS1	DLG5 antisense RNA 1	15.3387	0.000162633	162417	NM_153006	NAGS	N-acetylglutamate synthase	-3.95015	0.00465512
114299	NM_001037293,NM_053016	PALM2	paralemmin 2	15.3336	0.000288359	50937	NM_001243597,NM_016952	CDON	cell adhesion associated, oncogene regulated	-3.94492	0.0013185
3566	NM_000418,NM_001257406,NM_001257407,NM_001257997	IL4R	interleukin 4 receptor	15.3297	0.00138057	55823	NM_001290185,NM_021729	VPS11	VPS11, CORVET/HOPS core subunit	-3.94487	0.00717627
154141	NM_001080480,NR_073465	MBOAT1	membrane bound O-acyltransferase domain containing 1	15.3053	0.000101121	23193	NM_001278192,NM_001278193,NM_001278194,NM_198334,NM_198335	GANAB	glucosidase II alpha subunit	-3.94454	0.00111363
414194	NR_103829	CCNYL2	cyclin Y-like 2 (pseudogene)	15.2741	0.00461207	90007	NM_177401	MIDN	midnolin	-3.94198	0.00405605
10216	NM_001127708,NM_001127709,NM_001127710,NM_001303232,NM_005807	PRG4	proteoglycan 4	15.2617	0.000161236	5579	NM_002738,NM_212535	PRKCB	protein kinase C beta	-3.9409	0.0183651
100129550	NR_024618	LOC100129550	uncharacterized LOC100129550	15.2247	0.000106287	80017	NM_001102366,NM_001102367,NM_001102368,NM_001102369,NM_001286470,NM_001286471,NM_001286472,NM_001286473,NM_024952	C14orf159	chromosome 14 open reading frame 159	-3.93762	0.00371324
9353	NM_001289135,NM_001289136,NM_004787	SLIT2	slit guidance ligand 2	15.2083	3.78107e-06	2539	NM_000402,NM_001042351	G6PD	glucose-6-phosphate dehydrogenase	-3.9341	0.0123809
7127	NM_006291	TNFAIP2	TNF alpha induced protein 2	15.1819	3.16288e-07	3308	NM_002154	HSPA4	heat shock protein family A (Hsp70) member 4	-3.93069	0.0078535
645121	NM_001039780,NM_001287252,NM_001287253	CCNI2	cyclin I family member 2	15.1623	0.00240897	2597	NM_001256799,NM_001289745,NM_001289746,NM_002046	GAPDH	glyceraldehyde-3-phosphate dehydrogenase	-3.92548	0.00281618
25775	NM_001302819,NM_001302820,NM_015372,NR_126507	C22orf24	chromosome 22 open reading frame 24	15.1559	0.000293809	9414	NM_001170414,NM_001170415,NM_001170416,NM_001170630,NM_004817,NM_201629	TJP2	tight junction protein 2	-3.92334	0.00472675
8714	NM_001144070,NM_003786	ABCC3	ATP binding cassette subfamily C member 3	15.1396	0.000286337	593	NM_000709,NM_001164783	BCKDHA	branched chain keto acid dehydrogenase E1, alpha polypeptide	-3.92238	0.00097057
80035	NR_026808	ANP32A-IT1	ANP32A intronic transcript 1	15.071	7.15952e-06	7403	NM_001291415,NM_001291416,NM_001291417,NM_001291418,NM_001291421,NM_021140,NR_111960	KDM6A	lysine demethylase 6A	-3.92047	0.00664522
6543	NM_015063	SLC8A2	solute carrier family 8 member A2	15.0341	1.94352e-05	3065	NM_004964	HDAC1	histone deacetylase 1	-3.92022	0.0195746
344387	NM_001009565	CDKL4	cyclin dependent kinase like 4	15.0292	0.000511132	23039	NM_015024	XPO7	exportin 7	-3.91573	0.00416937
91181	NM_001159484,NM_207308	NUP210L	nucleoporin 210kDa like	15.0073	5.21576e-05	3192	NM_004501,NM_031844	HNRNPU	heterogeneous nuclear ribonucleoprotein U (scaffold attachment factor A)	-3.91571	0.00167457
10082	NM_005708	GPC6	glypican 6	15.0042	5.78169e-06	84893	NM_001258452,NM_001258453,NM_032807,NM_178150	FBXO18	F-box protein, helicase, 18	-3.91387	0.0101332
8728	NM_033274	ADAM19	ADAM metallopeptidase domain 19	15.0022	2.413e-05	8394	NM_001135636,NM_001135637,NM_001135638,NM_003557	PIP5K1A	phosphatidylinositol-4-phosphate 5-kinase type 1 alpha	-3.90846	0.000678627
10335	NM_001098579,NM_001100163,NM_001100167,NM_001206880,NM_001206881,NM_130385	MRVI1	murine retrovirus integration site 1 homolog	14.9714	0.000495467	23038	NM_001276252,NM_015023	WDTC1	WD and tetratricopeptide repeats 1	-3.90422	0.00407212
51703	NM_016234,NM_203379,NM_203380	ACSL5	acyl-CoA synthetase long-chain family member 5	14.9696	7.15229e-05	56675	NM_020645	NRIP3	nuclear receptor interacting protein 3	-3.89945	0.00527563
10287	NM_001039467,NM_005873	RGS19	regulator of G-protein signaling 19	14.9678	5.29309e-05	51014	NM_181836	TMED7	transmembrane p24 trafficking protein 7	-3.89917	0.00997751
10391	NM_001190456,NM_001190457,NM_001324014,NM_001324015,NM_006091	CORO2B	coronin 2B	14.964	0.00114333	9592	NM_004907	IER2	immediate early response 2	-3.89503	0.0146584
717	NM_000063,NM_001145903,NM_001178063,NM_001282457,NM_001282458,NM_001282459	C2	complement component 2	14.961	1.72258e-05	2289	NM_001145775,NM_001145776,NM_001145777,NM_004117	FKBP5	FK506 binding protein 5	-3.89315	0.00117055
100169761	NR_023372	RNA5S10	RNA, 5S ribosomal 10	14.9576	0.0023785	901	NM_004354	CCNG2	cyclin G2	-3.89056	0.0154122
100169763	NR_023374	RNA5S12	RNA, 5S ribosomal 12	14.9575	0.00237738	23265	NM_001013839,NM_001145297,NM_001145298,NM_001145299,NM_001282313,NM_001282314,NM_015219	EXOC7	exocyst complex component 7	-3.88649	0.000343643
1763	NM_001080449,NR_102264	DNA2	DNA replication helicase/nuclease 2	14.9551	0.00199751	23070	NM_015050	CMTR1	cap methyltransferase 1	-3.88318	0.0163825
4311	NM_000902,NM_007287,NM_007288,NM_007289	MME	membrane metallo-endopeptidase	14.9422	0.0046879	27134	NM_001267560,NM_001267561	TJP3	tight junction protein 3	-3.8809	0.00334099
100288805	NR_103556	HYDIN2	HYDIN2, axonemal central pair apparatus protein (pseudogene)	14.926	6.29471e-06	22856	NM_014918	CHSY1	chondroitin sulfate synthase 1	-3.88054	0.0225813
642938	NM_001039762	FAM196A	family with sequence similarity 196 member A	14.8928	2.73625e-06	6416	NM_001281435,NM_003010	MAP2K4	mitogen-activated protein kinase kinase 4	-3.87819	0.00769005
641518	NR_029373,NR_029374	LEF1-AS1	LEF1 antisense RNA 1	14.889	0.000199153	163049	NM_153358	ZNF791	zinc finger protein 791	-3.87346	0.0018918
442421	NR_024496,NR_135010	PTGER4P2-CDK2AP2P2	PTGER4P2-CDK2AP2P2 readthrough, transcribed pseudogene	14.8424	6.78352e-05	10529	NM_001173484,NM_006393,NM_213569	NEBL	nebulette	-3.87226	0.0316296
84101	NM_001042403,NM_001278393,NM_032147,NR_125360	USP44	ubiquitin specific peptidase 44	14.753	1.00005e-05	9337	NM_001301073,NM_001301074,NM_001301075,NM_001301077,NM_001301080,NM_001301082,NM_001301083,NM_001301086,NM_004779	CNOT8	CCR4-NOT transcription complex subunit 8	-3.87179	0.00626601
101927547	NR_046837	ANKRD44-IT1	ANKRD44 intronic transcript 1	14.7017	2.84053e-05	84695	NM_001289164,NM_001289165,NM_032603	LOXL3	lysyl oxidase like 3	-3.86282	0.0100663
728	NM_001736	C5AR1	complement component 5a receptor 1	14.6964	0.000495339	2194	NM_004104	FASN	fatty acid synthase	-3.86241	0.0148499
10891	NM_013261	PPARGC1A	PPARG coactivator 1 alpha	14.6857	1.54715e-05	2036	NM_001258329,NM_001258330,NM_001258331,NM_012156,NM_177996	EPB41L1	erythrocyte membrane protein band 4.1 like 1	-3.8622	0.000828978
2633	NM_002053	GBP1	guanylate binding protein 1	14.6742	0.00093535	257364	NM_001318146,NM_153271	SNX33	sorting nexin 33	-3.86146	0.0203691
677807	NR_002961	SNORA22	small nucleolar RNA, H/ACA box 22	14.6658	0.000165997	55832	NM_018448	CAND1	cullin associated and neddylation dissociated 1	-3.86078	0.000671298
123036	NM_001128595,NM_001128596,NM_001289134,NM_152332	TC2N	tandem C2 domains, nuclear	14.644	0.000425569	23210	NM_001081461,NM_015167	JMJD6	arginine demethylase and lysine hydroxylase	-3.85896	0.00309325
100616240	NR_039717	MIR4496	microRNA 4496	14.6326	0.00308229	11117	NM_007046	EMILIN1	elastin microfibril interfacer 1	-3.8585	0.0424065
9734	NM_001204144,NM_001204145,NM_001204146,NM_001204147,NM_001204148,NM_001321868,NM_001321869,NM_001321870,NM_001321871,NM_001321872,NM_001321873,NM_001321874,NM_001321875,NM_001321876,NM_001321877,NM_001321878,NM_001321879,NM_001321884,NM_001321885,NM_001321886,NM_001321887,NM_001321888,NM_001321889,NM_001321890,NM_001321891,NM_001321893,NM_001321894,NM_001321895,NM_001321896,NM_001321897,NM_001321…	HDAC9	histone deacetylase 9	14.6218	2.8677e-07	7469	NM_005663	NELFA	negative elongation factor complex member A	-3.85722	0.0052318
4638	NM_001321309,NM_053025,NM_053026,NM_053027,NM_053028,NM_053031,NM_053032	MYLK	myosin light chain kinase	14.611	0.00023274	26230	NM_001010927,NM_012454	TIAM2	T-cell lymphoma invasion and metastasis 2	-3.85471	0.00232846
83639	NM_001130011,NM_031451	TEX101	testis expressed 101	14.6017	0.000531761	10678	NM_001319075,NM_006577	B3GNT2	UDP-GlcNAc:betaGal beta-1,3-N-acetylglucosaminyltransferase 2	-3.85428	0.00578642
6712	NM_006946	SPTBN2	spectrin beta, non-erythrocytic 2	14.5938	4.04193e-06	154881	NM_001167961,NM_153033	KCTD7	potassium channel tetramerization domain containing 7	-3.85343	0.00789678
701	NM_001211	BUB1B	BUB1 mitotic checkpoint serine/threonine kinase B	14.591	0.000216718	4720	NM_001166159,NM_004550	NDUFS2	NADH:ubiquinone oxidoreductase core subunit S2	-3.85203	0.00110241
2066	NM_001042599,NM_005235	ERBB4	erb-b2 receptor tyrosine kinase 4	14.5736	0.000708905	55114	NM_001006634,NM_018054	ARHGAP17	Rho GTPase activating protein 17	-3.84855	0.00287359
51177	NM_001304722,NM_001304723,NM_001304724,NM_016274	PLEKHO1	pleckstrin homology domain containing O1	14.5664	0.00106141	51439	NM_016255	FAM8A1	family with sequence similarity 8 member A1	-3.84629	0.026406
23242	NM_001287436,NM_001287438,NM_015198	COBL	cordon-bleu WH2 repeat protein	14.5484	0.000250975	5096	NM_000532,NM_001178014	PCCB	propionyl-CoA carboxylase beta subunit	-3.84595	0.00704485
5145	NM_000440	PDE6A	phosphodiesterase 6A	14.514	0.000131827	9123	NM_001042422,NM_001042423,NM_001206950,NM_001206951,NM_001206952,NM_004207	SLC16A3	solute carrier family 16 member 3	-3.84341	0.0173884
9768	NM_001029989,NM_014736,NR_109934	KIAA0101	KIAA0101	14.505	0.000719277	6652	NM_003104,NR_034039	SORD	sorbitol dehydrogenase	-3.84171	0.0142122
80235	NM_025163	PIGZ	phosphatidylinositol glycan anchor biosynthesis class Z	14.4944	2.20725e-05	9698	NM_001020658,NM_014676	PUM1	pumilio RNA binding family member 1	-3.83906	0.00110289
84719	NR_046213	LINC00260	long intergenic non-protein coding RNA 260	14.4413	6.95089e-05	54961	NM_017857	SSH3	slingshot protein phosphatase 3	-3.83663	0.00598496
23136	NM_001281533,NM_001281534,NM_001281535,NM_012307	EPB41L3	erythrocyte membrane protein band 4.1 like 3	14.394	0.000477109	645513	NR_037630	LOC645513	septin 7 pseudogene	-3.83588	0.0211728
89795	NM_001024383,NM_014903	NAV3	neuron navigator 3	14.3668	0.0011348	6448	NM_000199	SGSH	N-sulfoglucosamine sulfohydrolase	-3.83465	0.00618304
57522	NM_020762	SRGAP1	SLIT-ROBO Rho GTPase activating protein 1	14.3356	1.26117e-05	85014	NM_032928	TMEM141	transmembrane protein 141	-3.83268	0.00659616
5801	NM_001207015,NM_001207016,NM_002849,NM_130846,NR_073474	PTPRR	protein tyrosine phosphatase, receptor type R	14.3198	2.93948e-05	26136	NM_015641,NM_152829	TES	testin LIM domain protein	-3.82277	0.00128656
50856	NM_016184,NM_194447,NM_194448,NM_194450	CLEC4A	C-type lectin domain family 4 member A	14.3038	0.000528848	8228	NM_001142389,NM_001172672,NM_004650	PNPLA4	patatin like phospholipase domain containing 4	-3.81881	0.00306915
1890	NM_001113755,NM_001113756,NM_001257988,NM_001257989,NM_001953	TYMP	thymidine phosphorylase	14.2694	0.00135577	23410	NM_001017524,NM_012239	SIRT3	sirtuin 3	-3.81359	0.0129524
100507032	NR_037893	TMCC1-AS1	TMCC1 antisense RNA 1 (head to head)	14.2304	0.000899291	4705	NM_001322019,NM_001322020,NM_004544,NR_136155,NR_136156,NR_136157,NR_136158	NDUFA10	NADH:ubiquinone oxidoreductase subunit A10	-3.81263	0.000559094
79915	NM_024857	ATAD5	ATPase family, AAA domain containing 5	14.2152	1.69595e-05	6821	NM_000456,NM_001032386,NM_001032387	SUOX	sulfite oxidase	-3.81237	0.00841393
781	NM_000722,NM_001302890	CACNA2D1	calcium voltage-gated channel auxiliary subunit alpha2delta 1	14.2135	5.1368e-05	66004	NM_023946,NM_177457,NM_177458,NM_177476,NM_177477	LYNX1	Ly6/neurotoxin 1	-3.81227	0.0207317
1902	NM_001401,NM_057159	LPAR1	lysophosphatidic acid receptor 1	14.2054	0.000133851	79364	NM_001040653,NM_025112,NR_104249	ZXDC	ZXD family zinc finger C	-3.81073	0.01073
100506994	NR_038281,NR_038282,NR_038283	PTPRG-AS1	PTPRG antisense RNA 1	14.1647	2.24497e-06	91748	NM_001043318,NM_194278	ELMSAN1	ELM2 and Myb/SANT domain containing 1	-3.80933	0.0028542
2201	NM_001999	FBN2	fibrillin 2	14.149	0.000397432	24148	NM_012469	PRPF6	pre-mRNA processing factor 6	-3.80216	0.00141673
116496	NM_052966	FAM129A	family with sequence similarity 129 member A	14.1364	0.00180731	10512	NM_006379	SEMA3C	semaphorin 3C	-3.80036	0.00224668
24	NM_000350	ABCA4	ATP binding cassette subfamily A member 4	14.0962	0.000539845	3712	NM_001159508,NM_002225	IVD	isovaleryl-CoA dehydrogenase	-3.7988	0.00150911
84789	NR_026877	MGC2889	uncharacterized protein MGC2889	14.0281	0.000884171	80004	NM_024939	ESRP2	epithelial splicing regulatory protein 2	-3.79762	0.0096272
11213	NM_001142523,NM_007199	IRAK3	interleukin 1 receptor associated kinase 3	14.0234	0.0015577	5091	NM_000920,NM_001040716,NM_022172	PC	pyruvate carboxylase	-3.79727	0.0297504
2346	NM_001014986,NM_001193471,NM_001193472,NM_001193473,NM_004476	FOLH1	folate hydrolase (prostate-specific membrane antigen) 1	13.9999	0.00207225	79041	NM_024074	TMEM38A	transmembrane protein 38A	-3.79609	0.00194311
8935	NM_001303468,NM_003930	SKAP2	src kinase associated phosphoprotein 2	13.95	7.76531e-05	55654	NM_001193304,NM_017849	TMEM127	transmembrane protein 127	-3.79398	0.0017093
101927780	NR_110416,NR_110417	LOC101927780	uncharacterized LOC101927780	13.9441	0.000529687	23037	NM_178140	PDZD2	PDZ domain containing 2	-3.79364	0.000772345
102465133	NR_106740	MIR6125	microRNA 6125	13.9429	0.00460317	9500	NM_001005332,NM_001005333,NM_006986	MAGED1	MAGE family member D1	-3.79226	0.00129715
100169754	NR_023365	RNA5S3	RNA, 5S ribosomal 3	13.9343	0.0031663	55750	NM_018238	AGK	acylglycerol kinase	-3.78851	0.0177283
283551	NR_126496,NR_126497,NR_126498,NR_126499,NR_126500	LINC01588	long intergenic non-protein coding RNA 1588	13.933	0.000108564	6687	NM_003119,NM_199367	SPG7	SPG7, paraplegin matrix AAA peptidase subunit	-3.78355	0.0147888
729597	NM_001146210	SPDYE6	speedy/RINGO cell cycle regulator family member E6	13.852	0.00208598	10048	NM_005493	RANBP9	RAN binding protein 9	-3.78116	0.0041333
60676	NM_020318,NM_021936	PAPPA2	pappalysin 2	13.8442	0.00134407	57621	NM_020861	ZBTB2	zinc finger and BTB domain containing 2	-3.77606	0.00929306
102466985	NR_106896	MIR6837	microRNA 6837	13.8372	0.000343889	54468	NM_019005	MIOS	missing oocyte, meiosis regulator, homolog (Drosophila)	-3.77343	0.00964381
54	NM_001111034,NM_001111035,NM_001111036,NM_001322023,NM_001611	ACP5	acid phosphatase 5, tartrate resistant	13.8324	0.000265012	9513	NM_004860	FXR2	FMR1 autosomal homolog 2	-3.77247	0.00735735
84226	NM_032266	C2orf16	chromosome 2 open reading frame 16	13.8175	0.00022197	9093	NM_001135110,NM_001286516,NM_005147	DNAJA3	DnaJ heat shock protein family (Hsp40) member A3	-3.76797	0.00164846
767846	NR_003242	PFN1P2	profilin 1 pseudogene 2	13.7643	8.33125e-05	140597	NM_080390	TCEAL2	transcription elongation factor A like 2	-3.7672	0.0127743
4629	NM_001040113,NM_001040114,NM_002474,NM_022844	MYH11	myosin, heavy chain 11, smooth muscle	13.7308	0.000842947	9146	NM_004712	HGS	hepatocyte growth factor-regulated tyrosine kinase substrate	-3.76578	0.00152179
101926913	NR_110185	LOC101926913	uncharacterized LOC101926913	13.7193	0.00167523	7001	NM_005809	PRDX2	peroxiredoxin 2	-3.75816	0.00121525
79668	NM_001178055,NM_001178056,NM_024615	PARP8	poly(ADP-ribose) polymerase family member 8	13.7039	1.7801e-05	55596	NM_017612	ZCCHC8	zinc finger CCHC-type containing 8	-3.75804	0.00618185
100129148	NR_033999	LOC100129148	uncharacterized LOC100129148	13.6308	9.49332e-05	9804	NM_014765	TOMM20	translocase of outer mitochondrial membrane 20	-3.75412	0.0028624
23236	NM_015192,NM_182734	PLCB1	phospholipase C beta 1	13.6043	0.000469435	1500	NM_001085458,NM_001085459,NM_001085460,NM_001085461,NM_001085462,NM_001085463,NM_001085464,NM_001085465,NM_001085466,NM_001085467,NM_001085468,NM_001085469,NM_001206883,NM_001206884,NM_001206885,NM_001206886,NM_001206887,NM_001206888,NM_001206889,NM_001206890,NM_001206891,NM_001331	CTNND1	catenin delta 1	-3.75019	0.000720054
3212	NM_002145	HOXB2	homeobox B2	13.6013	0.00107699	55208	NM_001014283	DCUN1D2	defective in cullin neddylation 1 domain containing 2	-3.74979	0.0223343
652	NM_001202,NM_130850	BMP4	bone morphogenetic protein 4	13.5885	0.000622714	27044	NM_014390	SND1	staphylococcal nuclease and tudor domain containing 1	-3.74823	0.00108387
80329	NM_001317089,NM_025218,NR_133659	ULBP1	UL16 binding protein 1	13.5855	0.000522806	55268	NM_001198961,NM_001198962,NM_001319958,NM_018281	ECHDC2	enoyl-CoA hydratase domain containing 2	-3.74667	0.00241899
283575	NR_110554	LOC283575	uncharacterized LOC283575	13.569	0.000486616	100500842	NR_037425	MIR3652	microRNA 3652	-3.74666	0.0355815
53353	NM_018557	LRP1B	LDL receptor related protein 1B	13.5557	0.00149993	10058	NM_005689	ABCB6	ATP binding cassette subfamily B member 6 (Langereis blood group)	-3.74279	0.0118948
729920	NM_001101417,NM_001101426	ISPD	isoprenoid synthase domain containing	13.5353	9.59933e-07	1159	NM_020990,NR_135748,NR_135749,NR_135750,NR_135751,NR_135752	CKMT1B	creatine kinase, mitochondrial 1B	-3.74248	0.00784982
401074	NR_040004,NR_040005	LINC00960	long intergenic non-protein coding RNA 960	13.5318	9.50876e-05	54681	NM_177938,NM_177939	P4HTM	prolyl 4-hydroxylase, transmembrane	-3.74012	0.00151344
441394	NR_003667	SUGT1P1	SGT1 homolog, MIS12 kinetochore complex assembly cochaperone pseudogene 1	13.496	0.000100581	100289635	NM_001164715,NM_183238	ZNF605	zinc finger protein 605	-3.73789	0.0147401
606	NR_027992	NBEAP1	neurobeachin pseudogene 1	13.4958	6.54436e-05	115752	NM_001143688,NM_001323936,NM_001323937,NM_001323938,NM_001323939,NM_001323940,NM_001323941,NM_001323943,NM_001323944,NM_001323945,NM_001323946,NM_001323948,NM_133375	DIS3L	DIS3 like exosome 3'-5' exoribonuclease	-3.73174	0.0031206
7980	NM_001271003,NM_001271004,NM_006528	TFPI2	tissue factor pathway inhibitor 2	13.4686	0.00434035	2904	NM_000834	GRIN2B	glutamate receptor, ionotropic, N-methyl D-aspartate 2B	-3.73132	0.0168909
101927278	NR_134451,NR_134452,NR_134453,NR_134454	LOC101927278	uncharacterized LOC101927278	13.4286	0.000164887	23385	NM_001290184,NM_001290186,NM_015331	NCSTN	nicastrin	-3.73122	0.00100133
5427	NM_001197330,NM_001197331,NM_002692	POLE2	polymerase (DNA) epsilon 2, accessory subunit	13.4268	0.0002445	26118	NM_015626,NM_134265	WSB1	WD repeat and SOCS box containing 1	-3.7298	0.00361826
4600	NM_002463	MX2	MX dynamin like GTPase 2	13.4206	6.2866e-05	84926	NM_032840	SPRYD3	SPRY domain containing 3	-3.72613	0.00260305
54331	NM_001243773,NM_001243774,NM_053064	GNG2	G protein subunit gamma 2	13.4147	0.000250788	51360	NM_015884	MBTPS2	membrane bound transcription factor peptidase, site 2	-3.72171	0.00373291
202500	NM_182539	TCTE1	t-complex-associated-testis-expressed 1	13.3955	0.00105307	6640	NM_003098	SNTA1	syntrophin alpha 1	-3.721	0.000702308
441273	NM_001031618	SPDYE2	speedy/RINGO cell cycle regulator family member E2	13.3864	0.000902653	51537	NM_001003704,NM_016498	MTFP1	mitochondrial fission process 1	-3.71191	0.00759926
84215	NM_001277075	ZNF541	zinc finger protein 541	13.3425	1.7126e-05	79654	NM_024602	HECTD3	HECT domain E3 ubiquitin protein ligase 3	-3.71112	0.00667819
675	NM_000059	BRCA2	breast cancer 2	13.3122	2.58696e-06	285025	NM_001316745,NM_173648	CCDC141	coiled-coil domain containing 141	-3.7088	0.0105596
206358	NM_001308150,NM_001308151,NM_078483	SLC36A1	solute carrier family 36 member 1	13.3028	4.27839e-05	10061	NM_005692,NM_007189	ABCF2	ATP binding cassette subfamily F member 2	-3.70865	0.048573
5888	NM_001164269,NM_001164270,NM_002875,NM_133487	RAD51	RAD51 recombinase	13.2922	3.95188e-05	8662	NM_001037283,NM_003751	EIF3B	eukaryotic translation initiation factor 3 subunit B	-3.70773	0.00121013
347741	NM_001272005,NM_178233	OTOP3	otopetrin 3	13.2871	5.78235e-05	27250	NM_001199492,NM_014456,NM_145341	PDCD4	programmed cell death 4 (neoplastic transformation inhibitor)	-3.70611	0.00770412
100132526	NR_036481	FGD5P1	FYVE, RhoGEF and PH domain containing 5 pseudogene 1	13.2849	0.00289868	25921	NM_015457	ZDHHC5	zinc finger DHHC-type containing 5	-3.70564	0.00103189
25854	NM_001006655,NM_015398	FAM149A	family with sequence similarity 149 member A	13.2809	0.00115798	55699	NM_018060	IARS2	isoleucyl-tRNA synthetase 2, mitochondrial	-3.70402	0.00255957
284	NM_001146,NM_001199859,NM_001314051	ANGPT1	angiopoietin 1	13.2609	2.87542e-05	200186	NM_181715	CRTC2	CREB regulated transcription coactivator 2	-3.70304	0.00357702
2620	NM_001143830,NM_005256,NM_177553	GAS2	growth arrest specific 2	13.2554	1.94634e-05	149473	NM_152499	CCDC24	coiled-coil domain containing 24	-3.70146	0.00494755
57556	NM_001300780,NM_020796	SEMA6A	semaphorin 6A	13.2521	9.73044e-05	3659	NM_002198	IRF1	interferon regulatory factor 1	-3.69919	0.00492098
9435	NM_004267	CHST2	carbohydrate sulfotransferase 2	13.2509	0.00181971	9927	NM_001127660,NM_014874	MFN2	mitofusin 2	-3.69918	0.00331699
59341	NM_001177428,NM_001177431,NM_001177433,NM_021625,NM_147204	TRPV4	transient receptor potential cation channel subfamily V member 4	13.2366	0.000733473	56834	NM_001170726,NM_001170880,NM_001170881,NM_001177358,NM_020155	GPR137	G protein-coupled receptor 137	-3.69212	0.00204154
5552	NM_001321053,NM_001321054,NM_002727	SRGN	serglycin	13.1936	0.000149607	10075	NM_031407	HUWE1	HECT, UBA and WWE domain containing 1, E3 ubiquitin protein ligase	-3.69181	0.00202094
4018	NM_005577	LPA	lipoprotein(a)	13.1655	0.00148197	9810	NM_001207033,NM_001207034,NM_001286572,NM_014771	RNF40	ring finger protein 40	-3.69179	0.0130557
10333	NM_006068	TLR6	toll like receptor 6	13.1591	7.30575e-05	2946	NM_000848,NM_001142368	GSTM2	glutathione S-transferase mu 2 (muscle)	-3.68863	0.000929751
440300	NR_033738	LOC440300	chondroitin sulfate proteoglycan 4 pseudogene	13.1297	0.000216038	3716	NM_001320923,NM_001321852,NM_001321853,NM_001321854,NM_001321855,NM_001321856,NM_001321857,NM_002227	JAK1	Janus kinase 1	-3.68809	0.00634617
8507	NM_001256574,NM_001256575,NM_001256576,NM_003633,NR_046318	ENC1	ectodermal-neural cortex 1	13.1221	0.000259573	1302	NM_001163771,NM_080679,NM_080680,NM_080681	COL11A2	collagen type XI alpha 2	-3.68675	0.00945623
728498	NM_001282490	GOLGA8H	golgin A8 family member H	13.1073	0.00262322	57609	NM_173602	DIP2B	disco interacting protein 2 homolog B	-3.67914	0.00616731
126859	NM_144696,NR_073544	AXDND1	axonemal dynein light chain domain containing 1	13.1016	0.000119319	9728	NM_001193489,NM_014701	SECISBP2L	SECIS binding protein 2 like	-3.67911	0.00156501
414764	NR_044996	HCG23	HLA complex group 23 (non-protein coding)	13.0811	0.000151349	780852	NR_003924	SNORD3B-2	small nucleolar RNA, C/D box 3B-2	-3.6784	0.0381419
84059	NM_032119,NR_003149	ADGRV1	adhesion G protein-coupled receptor V1	13.0802	7.89166e-05	23361	NM_001080417	ZNF629	zinc finger protein 629	-3.67732	0.0305586
55363	NM_018437,NM_197978	HEMGN	hemogen	13.0774	0.000272738	56172	NM_054027	ANKH	ANKH inorganic pyrophosphate transport regulator	-3.67691	0.000885127
834	NM_001223,NM_001257118,NM_001257119,NM_033292,NM_033293,NM_033294,NM_033295	CASP1	caspase 1	13.06	4.81837e-05	6117	NM_002945	RPA1	replication protein A1	-3.67478	0.00349189
79628	NM_024577	SH3TC2	SH3 domain and tetratricopeptide repeats 2	13.0554	5.2601e-06	6625	NM_001301069,NM_003089	SNRNP70	small nuclear ribonucleoprotein U1 subunit 70	-3.67412	0.00889638
11030	NM_001008710,NM_001008711,NM_001008712,NM_006867	RBPMS	RNA binding protein with multiple splicing	13.0506	4.74979e-05	3373	NM_033159,NM_153281,NM_153282,NM_153283,NM_153285,NR_047690	HYAL1	hyaluronoglucosaminidase 1	-3.67122	0.0126901
101928414	NR_120335	LOC101928414	uncharacterized LOC101928414	13.0265	0.000176565	84866	NM_001144034,NM_001144035,NM_001144036,NM_001144037,NM_001144038,NM_001318755,NM_001318757,NM_032780,NR_134852	TMEM25	transmembrane protein 25	-3.66705	0.00430575
273	NM_001635,NM_139316	AMPH	amphiphysin	13.0227	0.000202593	2071	NM_000122,NM_001303416,NM_001303418	ERCC3	excision repair cross-complementation group 3	-3.66382	0.0263648
140690	NM_001269040,NM_001269041,NM_001269042,NM_001269043,NM_001269044,NM_001269045,NM_001269046,NM_001269047,NM_001269048,NM_001269049,NM_001269050,NM_001269051,NM_001269052,NM_001269054,NM_001269055,NM_080618,NR_072975	CTCFL	CCCTC-binding factor like	13.0141	0.000241664	116228	NM_001312871,NM_001312872,NM_001312873,NM_001312874,NM_198076,NR_132419,NR_132420,NR_132421	COX20	COX20 cytochrome c oxidase assembly factor	-3.65586	0.00198049
387841	NR_003932	RPL13AP20	ribosomal protein L13a pseudogene 20	12.9946	5.55883e-05	1848	NM_001946,NM_022652	DUSP6	dual specificity phosphatase 6	-3.65402	0.00271903
338817	NR_033890	LINC01252	long intergenic non-protein coding RNA 1252	12.9834	0.000327529	389906	NR_034031	LOC389906	zinc finger protein 839 pseudogene	-3.65393	0.0250768
5157	NM_006207	PDGFRL	platelet derived growth factor receptor like	12.9577	0.000916751	2353	NM_005252	FOS	Fos proto-oncogene, AP-1 trancription factor subunit	-3.65345	0.00451702
1564	NR_002570	CYP2D7	cytochrome P450 family 2 subfamily D member 7 (gene/pseudogene)	12.9575	0.000166848	440434	NR_036750	LOC440434	aminopeptidase puromycin sensitive pseudogene	-3.64492	0.0158468
6263	NM_001036,NM_001243996	RYR3	ryanodine receptor 3	12.9457	1.98187e-06	2254	NM_002010	FGF9	fibroblast growth factor 9	-3.6424	0.0169066
285190	NM_182588	RGPD4	RANBP2-like and GRIP domain containing 4	12.9419	6.01906e-05	5160	NM_000284,NM_001173454,NM_001173455,NM_001173456	PDHA1	pyruvate dehydrogenase (lipoamide) alpha 1	-3.63714	0.0322232
6324	NM_001037,NM_001321605,NM_199037	SCN1B	sodium voltage-gated channel beta subunit 1	12.9352	3.40328e-05	5296	NM_005027,NR_073517	PIK3R2	phosphoinositide-3-kinase regulatory subunit 2	-3.63632	0.010013
15	NM_001088,NM_001166579,NR_110548	AANAT	aralkylamine N-acetyltransferase	12.9305	2.43514e-05	166647	NM_145290	ADGRA3	adhesion G protein-coupled receptor A3	-3.6336	0.0148553
503637	NR_122113	DUXAP8	double homeobox A pseudogene 8	12.9113	0.000348005	10351	NM_001288985,NM_001288986,NM_007168	ABCA8	ATP binding cassette subfamily A member 8	-3.63345	0.00716499
100507530	NR_125386	MCPH1-AS1	MCPH1 antisense RNA 1	12.9101	0.000915034	205	NM_001005353,NM_013410,NM_203464	AK4	adenylate kinase 4	-3.63244	0.00390929
284434	NM_001007525,NM_001290355	NWD1	NACHT and WD repeat domain containing 1	12.8963	4.61985e-05	57521	NM_001163034,NM_020761	RPTOR	regulatory associated protein of MTOR complex 1	-3.62883	0.0299037
3746	NM_001112741,NM_004976	KCNC1	potassium voltage-gated channel subfamily C member 1	12.8822	3.13662e-05	23170	NM_015140	TTLL12	tubulin tyrosine ligase like 12	-3.62605	0.00185856
3263	NM_000613	HPX	hemopexin	12.8371	0.000750074	5660	NM_001042465,NM_001042466,NM_002778	PSAP	prosaposin	-3.61943	0.00143875
56704	NM_001317830,NM_020647	JPH1	junctophilin 1	12.8334	0.00120702	85476	NM_001308164,NM_001308166,NM_024996	GFM1	G elongation factor, mitochondrial 1	-3.61058	0.00108024
343099	NM_001306076,NM_206886	CCDC18	coiled-coil domain containing 18	12.8205	9.72928e-05	55760	NM_018180	DHX32	DEAH-box helicase 32 (putative)	-3.60923	0.0167122
388743	NM_001143962	CAPN8	calpain 8	12.7702	7.31354e-05	5002	NM_001315501,NM_001315502,NM_002555,NM_183233	SLC22A18	solute carrier family 22 member 18	-3.60802	0.000892168
101928243	NR_110199,NR_110200	DARS-AS1	DARS antisense RNA 1	12.7642	0.000221264	64114	NM_001321427,NM_001321428,NM_001321429,NM_001321430,NM_001321432,NM_001321433,NM_001321435,NM_001321436,NM_001321438,NM_022152,NR_135643	TMBIM1	transmembrane BAX inhibitor motif containing 1	-3.60742	0.00104407
129293	NM_001080824,NM_001277053,NM_001307978	TRABD2A	TraB domain containing 2A	12.7472	0.000168257	1303	NM_004370,NM_080645	COL12A1	collagen type XII alpha 1	-3.60733	0.00547981
4240	NM_001114614,NM_001310319,NM_001310320,NM_001310321,NM_005928	MFGE8	milk fat globule-EGF factor 8 protein	12.7421	0.000328442	10560	NM_001319667,NM_006996	SLC19A2	solute carrier family 19 member 2	-3.60644	0.00748291
4005	NM_001142315,NM_001142316,NM_005574	LMO2	LIM domain only 2	12.7249	0.00450242	26128	NM_015634	KIF1BP	KIAA1279	-3.60322	0.00916132
3676	NM_000885,NM_001316312	ITGA4	integrin subunit alpha 4	12.7212	7.3711e-06	89953	NM_001289034,NM_001289035,NM_138343,NM_201521,NM_201522,NM_201523	KLC4	kinesin light chain 4	-3.59976	0.00413593
6347	NM_002982	CCL2	C-C motif chemokine ligand 2	12.7157	0.00036874	2109	NM_001014763,NM_001985	ETFB	electron transfer flavoprotein beta subunit	-3.59333	0.00297693
2918	NM_000845,NM_001127323,NR_028041	GRM8	glutamate metabotropic receptor 8	12.7131	0.000212046	55709	NM_001318716,NM_001318717,NM_001318718,NM_001318719,NM_001318720,NM_001318721,NM_001318722,NM_001318723,NM_001318724,NM_001318725,NM_016506,NM_018095	KBTBD4	kelch repeat and BTB domain containing 4	-3.59255	0.00172174
101929555	NR_110873	LOC101929555	uncharacterized LOC101929555	12.7101	5.86118e-05	25987	NM_001258210,NM_001318477,NM_001318478,NM_001318479,NM_015516	TSKU	tsukushi, small leucine rich proteoglycan	-3.59139	0.0145781
255631	NM_152890	COL24A1	collagen type XXIV alpha 1	12.7029	0.000236986	1027	NM_004064	CDKN1B	cyclin-dependent kinase inhibitor 1B	-3.58687	0.0192015
22941	NM_012309,NM_133266,NR_110766	SHANK2	SH3 and multiple ankyrin repeat domains 2	12.6948	8.31561e-05	55690	NM_018026	PACS1	phosphofurin acidic cluster sorting protein 1	-3.58599	0.026756
200844	NM_198463	C3orf67	chromosome 3 open reading frame 67	12.6885	0.000779085	9529	NM_001015048,NM_001015049,NM_004873	BAG5	BCL2 associated athanogene 5	-3.58594	0.00890375
283663	NR_024433	LINC00926	long intergenic non-protein coding RNA 926	12.6857	0.000524009	2733	NM_001003722,NM_001499	GLE1	GLE1, RNA export mediator	-3.5849	0.00708055
5362	NM_025179	PLXNA2	plexin A2	12.6812	0.000102819	375484	NM_001308195,NM_001308196,NM_001308200,NM_198567,NR_131772	SIMC1	SUMO interacting motifs containing 1	-3.58226	0.0110439
196385	NM_207437	DNAH10	dynein axonemal heavy chain 10	12.6788	7.52989e-06	3162	NM_002133	HMOX1	heme oxygenase 1	-3.58152	0.0264811
161582	NM_001033559,NM_001033560,NM_130810	DYX1C1	dyslexia susceptibility 1 candidate 1	12.6501	0.00860766	84124	NM_032164	ZNF394	zinc finger protein 394	-3.58063	0.00397278
6458	NR_033412	SH3GL1P1	SH3 domain containing GRB2 like 1 pseudogene 1	12.6452	6.68643e-05	1847	NM_004419	DUSP5	dual specificity phosphatase 5	-3.57604	0.0185533
101929710	NR_130776	LOC101929710	uncharacterized LOC101929710	12.6375	0.000474378	5387	NR_028059	PMS2P3	PMS1 homolog 2, mismatch repair system component pseudogene 3	-3.57497	0.0178267
345895	NM_001010892,NM_001161664	RSPH4A	radial spoke head 4 homolog A	12.617	0.00108344	605	NM_001024808,NM_020993	BCL7A	B-cell CLL/lymphoma 7A	-3.57448	0.0127144
157777	NM_001136160,NM_001136161,NM_173518	MCMDC2	minichromosome maintenance domain containing 2	12.6134	6.92642e-05	9975	NM_001145425,NM_005126,NR_110524	NR1D2	nuclear receptor subfamily 1 group D member 2	-3.57161	0.0131322
3696	NM_002214	ITGB8	integrin subunit beta 8	12.6019	1.1387e-05	85406	NM_032364	DNAJC14	DnaJ heat shock protein family (Hsp40) member C14	-3.57141	0.000849861
9498	NM_001039960,NM_001258401,NM_001258402,NM_001258403,NM_001267615,NR_047672	SLC4A8	solute carrier family 4 member 8	12.5752	9.05074e-07	79745	NM_001287527,NM_001287528,NM_024692,NR_109844	CLIP4	CAP-Gly domain containing linker protein family member 4	-3.56995	0.00163728
25924	NM_001284423,NM_001284424,NM_001284425,NM_001284426,NM_015460,NR_104316	MYRIP	myosin VIIA and Rab interacting protein	12.5675	4.77218e-05	1186	NM_001114331,NM_001287	CLCN7	chloride voltage-gated channel 7	-3.56445	0.0371667
100134713	NR_024454	NDUFB2-AS1	NDUFB2 antisense RNA 1	12.5548	1.46022e-05	84445	NM_001318099,NM_001318100,NM_001318101,NM_032429	LZTS2	leucine zipper, putative tumor suppressor 2	-3.56314	0.0346537
116328	NM_001195639,NM_052958	C8orf34	chromosome 8 open reading frame 34	12.5523	0.00099592	55182	NM_001319956,NM_001319957,NM_018150	RNF220	ring finger protein 220	-3.56105	0.0319336
5988	NM_021026	RFPL1	ret finger protein like 1	12.5485	0.000404637	64798	NM_001283012,NM_022783	DEPTOR	DEP domain containing MTOR-interacting protein	-3.55326	0.0206023
114904	NM_031910,NM_182486	C1QTNF6	C1q and tumor necrosis factor related protein 6	12.5436	0.0012652	65108	NM_023009,NR_052852	MARCKSL1	MARCKS-like 1	-3.54887	0.00376845
106699570	NR_133569	LOC106699570	uncharacterized LOC106699570	12.5409	4.59109e-05	340371	NM_178564	NRBP2	nuclear receptor binding protein 2	-3.54783	0.0499282
100289124	NR_103714	FAM27E2	family with sequence similarity 27 member E2	12.5318	0.000751836	1431	NM_004077	CS	citrate synthase	-3.54489	0.00196682
5205	NM_005603	ATP8B1	ATPase phospholipid transporting 8B1	12.5313	0.00154379	51428	NM_001321732,NM_001321830,NM_016222	DDX41	DEAD-box helicase 41	-3.54298	0.00232158
4513	YP_003024029	COX2	cytochrome c oxidase subunit II	12.5268	0.00179035	5209	NM_001145443,NM_001282630,NM_001314063,NM_001323016,NM_001323017,NM_004566,NR_136554	PFKFB3	6-phosphofructo-2-kinase/fructose-2,6-biphosphatase 3	-3.54112	0.0208437
253935	NM_178127	ANGPTL5	angiopoietin like 5	12.516	0.000977026	57532	NM_020772	NUFIP2	nuclear fragile X mental retardation protein interacting protein 2	-3.53406	0.0237822
118788	NM_152309	PIK3AP1	phosphoinositide-3-kinase adaptor protein 1	12.5132	0.000429813	8209	NM_001320383,NM_001320384,NM_004649,NM_198155,NR_135220	C21orf33	chromosome 21 open reading frame 33	-3.53378	0.00220756
9662	NM_025009	CEP135	centrosomal protein 135	12.5031	7.35162e-05	9777	NM_014742	TM9SF4	transmembrane 9 superfamily member 4	-3.53008	0.0103024
54507	NM_001288607,NM_001288608,NM_019032,NM_025008	ADAMTSL4	ADAMTS like 4	12.5002	0.00010989	4677	NM_004539	NARS	asparaginyl-tRNA synthetase	-3.52207	0.00303313
25966	NM_015500,NM_199050	C2CD2	C2 calcium-dependent domain containing 2	12.4851	0.00198226	738	NM_013265,NR_073519	VPS51	VPS51, GARP complex subunit	-3.52204	0.0115924
58494	NM_001270407,NM_001270408,NM_021219,NR_072999	JAM2	junctional adhesion molecule 2	12.4795	0.000195258	9534	NM_001278661,NM_001278662,NM_001278663,NM_001278664,NM_001278665,NM_001278677,NM_001278678,NM_203282	ZNF254	zinc finger protein 254	-3.52103	0.0366554
23416	NM_001314030,NM_012284	KCNH3	potassium voltage-gated channel subfamily H member 3	12.4514	0.000215065	6383	NM_002998	SDC2	syndecan 2	-3.5201	0.0222646
3053	NM_000185	SERPIND1	serpin family D member 1	12.4389	9.93691e-06	55764	NM_001280541,NM_001280545,NM_001280546,NM_018262,NM_052985,NM_052989,NM_052990	IFT122	intraflagellar transport 122	-3.51925	0.00129741
9056	NM_001126105,NM_001126106,NR_040448	SLC7A7	solute carrier family 7 member 7	12.4369	4.63233e-05	2804	NM_001256486,NM_001256487,NM_001256488,NM_004487	GOLGB1	golgin B1	-3.51559	0.0046737
84239	NM_032279	ATP13A4	ATPase 13A4	12.4001	0.000521046	10994	NM_006844	ILVBL	ilvB (bacterial acetolactate synthase)-like	-3.50974	0.00257195
822	NM_001256139,NM_001256140,NM_001320732,NM_001320733,NM_001320734,NM_001747	CAPG	capping actin protein, gelsolin like	12.381	0.00032879	2744	NM_001256310,NM_014905	GLS	glutaminase	-3.50958	0.00825532
4734	NM_001284338,NM_001284339,NM_001284340,NM_006154,NM_198400,NR_104302	NEDD4	neural precursor cell expressed, developmentally down-regulated 4, E3 ubiquitin protein ligase	12.364	1.37789e-05	7167	NM_000365,NM_001159287,NM_001258026	TPI1	triosephosphate isomerase 1	-3.49807	0.0032577
2645	NM_000162,NM_033507,NM_033508	GCK	glucokinase	12.355	0.000712307	4173	NM_005914,NM_182746	MCM4	minichromosome maintenance complex component 4	-3.49356	0.00440859
401265	NM_001003760	KLHL31	kelch like family member 31	12.3391	0.00162186	10594	NM_006445	PRPF8	pre-mRNA processing factor 8	-3.49067	0.00369757
8110	NM_001280542,NM_001280543,NM_001280544,NM_012074	DPF3	double PHD fingers 3	12.3309	0.00130316	1778	NM_001376	DYNC1H1	dynein cytoplasmic 1 heavy chain 1	-3.48834	0.0027132
2048	NM_001309192,NM_001309193,NM_004442,NM_017449	EPHB2	EPH receptor B2	12.3116	0.000199762	79720	NM_024667	VPS37B	VPS37B, ESCRT-I subunit	-3.48769	0.0154229
664618	NR_073415	HSP90AB4P	heat shock protein 90kDa alpha family class B member 4, pseudogene	12.3033	5.08826e-05	3609	NM_001137673,NM_004516,NM_012218,NM_017620,NM_153464	ILF3	interleukin enhancer binding factor 3	-3.48726	0.0141188
7133	NM_001066	TNFRSF1B	tumor necrosis factor receptor superfamily member 1B	12.2927	0.0114247	10280	NM_001282205,NM_001282206,NM_001282207,NM_001282208,NM_001282209,NM_005866,NM_147157,NR_104108	SIGMAR1	sigma non-opioid intracellular receptor 1	-3.48655	0.00569319
9466	NM_004843	IL27RA	interleukin 27 receptor subunit alpha	12.2646	0.00188978	7458	NM_022170,NM_031992	EIF4H	eukaryotic translation initiation factor 4H	-3.48645	0.00435893
643201	NR_036494	LOC643201	centrosomal protein 192kDa pseudogene	12.2532	0.00135912	389337	NM_001001669	ARHGEF37	Rho guanine nucleotide exchange factor 37	-3.47961	0.0034659
342346	NM_001145011	C16orf96	chromosome 16 open reading frame 96	12.2448	0.000177501	56997	NM_020247	ADCK3	aarF domain containing kinase 3	-3.47928	0.0177791
54443	NM_001284301,NM_001284302,NM_018685	ANLN	anillin actin binding protein	12.2048	0.00142701	84132	NM_032172	USP42	ubiquitin specific peptidase 42	-3.47877	0.00699144
152110	NM_001031741,NM_001304384,NM_152534,NM_199347	NEK10	NIMA related kinase 10	12.1981	2.53328e-05	5915	NM_000965,NM_001290216,NM_001290217,NM_001290266,NM_001290276,NM_001290277,NM_001290300,NM_016152,NR_110892,NR_110893	RARB	retinoic acid receptor beta	-3.47794	0.00427564
79104	NR_024149	MEG8	maternally expressed 8 (non-protein coding)	12.1695	0.000415061	51199	NM_016350,NM_020921,NM_182944,NM_182946	NIN	ninein	-3.47654	0.00580535
200162	NM_206996	SPAG17	sperm associated antigen 17	12.1596	0.000304691	10868	NM_001008563,NM_001110303,NM_006676	USP20	ubiquitin specific peptidase 20	-3.47585	0.0384135
2770	NM_001256414,NM_002069	GNAI1	G protein subunit alpha i1	12.1413	0.00373981	54545	NM_001040446,NM_001294343,NM_001294344	MTMR12	myotubularin related protein 12	-3.4743	0.00840949
101927066	NR_125390	LOC101927066	uncharacterized LOC101927066	12.1378	0.00241671	50488	NM_001024937,NM_001321236,NM_015716,NM_153827,NM_170663	MINK1	misshapen like kinase 1	-3.47318	0.0214074
10733	NM_001190799,NM_001190801,NM_014264	PLK4	polo like kinase 4	12.1366	0.00187953	5518	NM_014225,NR_033500	PPP2R1A	protein phosphatase 2 regulatory subunit A, alpha	-3.47312	0.00197225
222699	NR_002936	TOB2P1	transducer of ERBB2, 2 pseudogene 1	12.1244	0.000150427	55227	NM_018214	LRRC1	leucine rich repeat containing 1	-3.47286	0.0128952
283554	NM_001099652	GPR137C	G protein-coupled receptor 137C	12.1221	1.72176e-06	55072	NM_001310332,NM_017999	RNF31	ring finger protein 31	-3.47075	0.00399436
91947	NM_183376	ARRDC4	arrestin domain containing 4	12.1189	0.000435824	161779	NM_152595	PGBD4	piggyBac transposable element derived 4	-3.46994	0.0328308
101927612	NR_108047,NR_108048	RNF139-AS1	RNF139 antisense RNA 1 (head to head)	12.0516	0.000505125	57169	NM_021035	ZNFX1	zinc finger NFX1-type containing 1	-3.46874	0.000929612
54852	NM_001104554,NM_017705	PAQR5	progestin and adipoQ receptor family member 5	11.9881	0.000539428	26049	NM_015566,NR_046462	FAM169A	family with sequence similarity 169 member A	-3.46361	0.00195968
9837	NM_021067,NR_134574	GINS1	GINS complex subunit 1	11.9749	0.00115824	196047	NR_002791	EMX2OS	EMX2 opposite strand/antisense RNA	-3.46214	0.0087084
5698	NM_002800	PSMB9	proteasome subunit beta 9	11.9651	0.000119921	5708	NM_001278708,NM_001278709,NM_002808	PSMD2	proteasome 26S subunit, non-ATPase 2	-3.46205	0.00319553
4541	YP_003024037	ND6	NADH dehydrogenase subunit 6	11.9641	0.000473693	23212	NM_015169	RRS1	ribosome biogenesis regulator homolog	-3.46015	0.0172804
101928445	NR_110560	LOC101928445	uncharacterized LOC101928445	11.9519	0.000201671	54938	NM_001145901,NM_017827	SARS2	seryl-tRNA synthetase 2, mitochondrial	-3.45959	0.0409338
8632	NM_173628	DNAH17	dynein axonemal heavy chain 17	11.9106	1.49764e-05	6903	NM_003192	TBCC	tubulin folding cofactor C	-3.45359	0.00513245
920	NM_000616,NM_001195014,NM_001195015,NM_001195016,NM_001195017	CD4	CD4 molecule	11.857	0.000117593	81669	NM_001039577,NM_001320153,NM_001320155,NM_030937,NR_135154	CCNL2	cyclin L2	-3.45356	0.0083605
100169759	NR_023370	RNA5S8	RNA, 5S ribosomal 8	11.8527	0.00607291	79939	NM_024881	SLC35E1	solute carrier family 35 member E1	-3.45289	0.00178855
100169762	NR_023373	RNA5S11	RNA, 5S ribosomal 11	11.8527	0.00607276	26999	NM_001037333,NM_001291721,NM_001291722,NM_014376	CYFIP2	cytoplasmic FMR1 interacting protein 2	-3.45111	0.0166431
100169764	NR_023375	RNA5S13	RNA, 5S ribosomal 13	11.8527	0.00607195	5796	NM_001135648,NM_001291981,NM_001291982,NM_001291983,NM_001291984,NM_002844	PTPRK	protein tyrosine phosphatase, receptor type K	-3.44438	0.0119676
100169768	NR_023379	RNA5S17	RNA, 5S ribosomal 17	11.8526	0.0060688	3920	NM_001122606,NM_002294,NM_013995	LAMP2	lysosomal associated membrane protein 2	-3.44225	0.00166002
57221	NM_020340	ARFGEF3	ARFGEF family member 3	11.8509	4.97356e-06	29952	NM_013379	DPP7	dipeptidyl peptidase 7	-3.44048	0.00210807
285761	NM_173674	DCBLD1	discoidin, CUB and LCCL domain containing 1	11.8185	0.000451102	152992	NM_152544	TRMT44	tRNA methyltransferase 44 homolog (S. cerevisiae)	-3.43684	0.0255274
7222	NM_001130698,NM_003305	TRPC3	transient receptor potential cation channel subfamily C member 3	11.8173	0.00270689	8535	NM_003655	CBX4	chromobox 4	-3.43513	0.0250416
112464	NM_145040	PRKCDBP	protein kinase C delta binding protein	11.8161	2.13451e-06	1181	NM_001171087,NM_001171088,NM_001171089,NM_004366	CLCN2	chloride voltage-gated channel 2	-3.43386	0.0413277
3176	NM_001024074,NM_001024075,NM_006895	HNMT	histamine N-methyltransferase	11.7863	3.56027e-05	51523	NM_001317199,NM_001317200,NM_001317201,NM_001317202,NM_001317203,NM_001317204,NM_001317205,NM_001317206,NM_001317207,NM_001317208,NM_001317209,NM_001317210,NM_001317211,NM_016463	CXXC5	CXXC finger protein 5	-3.43361	0.0130734
729288	NM_001145045	ZNF286B	zinc finger protein 286B	11.7861	5.22377e-06	10548	NM_001014842,NM_001289006,NM_006405	TM9SF1	transmembrane 9 superfamily member 1	-3.42803	0.011717
1893	NM_001202858,NM_004425,NM_022664	ECM1	extracellular matrix protein 1	11.7802	0.0019486	79080	NM_024098	CCDC86	coiled-coil domain containing 86	-3.42802	0.0323284
11280	NM_001287223,NM_014139	SCN11A	sodium voltage-gated channel alpha subunit 11	11.7614	0.000176344	8292	NM_005677,NM_080538,NM_080539	COLQ	collagen-like tail subunit (single strand of homotrimer) of asymmetric acetylcholinesterase	-3.42728	0.0242112
100132529	NR_103851,NR_103852	TAT-AS1	TAT antisense RNA 1	11.7445	0.00109605	5519	NM_001177562,NM_001177563,NM_002716,NM_181699,NM_181700	PPP2R1B	protein phosphatase 2 regulatory subunit A, beta	-3.42711	0.00338833
7226	NM_001320350,NM_001320351,NM_001320352,NM_003307,NR_038257	TRPM2	transient receptor potential cation channel subfamily M member 2	11.7357	0.000164322	3329	NM_002156,NM_199440	HSPD1	heat shock protein family D (Hsp60) member 1	-3.42347	0.00435052
2876	NM_000581,NM_201397	GPX1	glutathione peroxidase 1	11.7254	4.59226e-06	4957	NM_001242352,NM_001242353,NM_001242354,NM_002540,NM_153432,NM_153433,NM_153435,NM_153436,NM_153437,NM_153439,NM_153440	ODF2	outer dense fiber of sperm tails 2	-3.42308	0.00242802
375189	NM_199346	PFN4	profilin family member 4	11.72	2.04073e-05	11236	NM_007218	RNF139	ring finger protein 139	-3.42302	0.0111677
148870	NM_152492	CCDC27	coiled-coil domain containing 27	11.6785	0.000118723	9733	NM_014706	SART3	squamous cell carcinoma antigen recognized by T-cells 3	-3.42152	0.00371504
102723778	NR_125935	LOC102723778	uncharacterized LOC102723778	11.656	0.000224822	55007	NM_001104595,NM_017911	FAM118A	family with sequence similarity 118 member A	-3.42095	0.0136604
148741	NM_001280799,NM_144698	ANKRD35	ankyrin repeat domain 35	11.6498	0.000204306	644554	NR_040013	LOC644554	uncharacterized LOC644554	-3.41806	0.0134864
119369	NR_002779	NUDT9P1	nudix hydrolase 9 pseudogene 1	11.6401	0.00257309	4171	NM_004526,NR_073375	MCM2	minichromosome maintenance complex component 2	-3.41728	0.0250777
100505678	NR_040093	STARD4-AS1	STARD4 antisense RNA 1	11.6376	0.000108338	5859	NM_001272073,NM_005051,NR_073590	QARS	glutaminyl-tRNA synthetase	-3.41496	0.00450679
100862728	NR_046420	UPK1A-AS1	UPK1A antisense RNA 1	11.6359	0.000307633	51654	NM_001278167,NM_001278168,NM_001278169,NM_016082,NM_016408	CDK5RAP1	CDK5 regulatory subunit associated protein 1	-3.41232	0.0116799
81849	NM_001320273,NM_001320274,NM_030965	ST6GALNAC5	ST6 N-acetylgalactosaminide alpha-2,6-sialyltransferase 5	11.6116	0.0129503	7067	NM_001190918,NM_001190919,NM_003250,NM_199334	THRA	thyroid hormone receptor, alpha	-3.41059	0.00540979
4585	NM_004532,NM_018406,NM_138297	MUC4	mucin 4, cell surface associated	11.5908	0.000364932	55341	NM_018385	LSG1	large 60S subunit nuclear export GTPase 1	-3.40461	0.00735595
653316	NR_038353	FAM153C	family with sequence similarity 153 member C	11.5675	0.000201861	8491	NM_001270425,NM_003618	MAP4K3	mitogen-activated protein kinase kinase kinase kinase 3	-3.40385	0.00206453
100874043	NR_046873	TPRG1-AS1	TPRG1 antisense RNA 1	11.5348	0.00105455	780854	NR_006882	SNORD3D	small nucleolar RNA, C/D box 3D	-3.40142	0.0444268
54947	NM_017839	LPCAT2	lysophosphatidylcholine acyltransferase 2	11.505	1.18587e-05	2114	NM_001256295,NM_005239	ETS2	ETS proto-oncogene 2, transcription factor	-3.39884	0.00607084
100313842	NR_031753	MIR2276	microRNA 2276	11.4951	0.000875005	257218	NM_001042683,NM_173082	SHPRH	SNF2 histone linker PHD RING helicase	-3.3932	0.0234122
285668	NM_173667,NR_126523,NR_126524,NR_126525	C5orf64	chromosome 5 open reading frame 64	11.4935	0.00430798	91694	NM_152271	LONRF1	LON peptidase N-terminal domain and ring finger 1	-3.39258	0.00293638
80833	NM_014349,NM_030644,NM_145639,NM_145640,NM_145641,NM_145642	APOL3	apolipoprotein L3	11.4779	0.00537519	9785	NM_014003	DHX38	DEAH-box helicase 38	-3.39063	0.0281805
140578	NM_001204174,NM_001204175,NM_001204176,NM_001204177,NM_001204178,NM_024944	CHODL	chondrolectin	11.4544	0.00106972	55786	NM_001136038,NM_001164309,NM_018355,NR_028343	ZNF415	zinc finger protein 415	-3.38917	0.013716
91543	NM_080657	RSAD2	radical S-adenosyl methionine domain containing 2	11.448	0.000153565	64777	NM_001288794,NM_001288795,NM_022762	RMND5B	required for meiotic nuclear division 5 homolog B	-3.38907	0.00483152
9532	NM_004282	BAG2	BCL2 associated athanogene 2	11.4474	0.000348007	4285	NM_005932	MIPEP	mitochondrial intermediate peptidase	-3.38659	0.0190838
54897	NM_001079843,NM_017766	CASZ1	castor zinc finger 1	11.4443	0.00174961	79441	NM_001303143,NM_024511	HAUS3	HAUS augmin like complex subunit 3	-3.38474	0.0274904
140766	NM_080722,NM_139155	ADAMTS14	ADAM metallopeptidase with thrombospondin type 1 motif 14	11.4403	0.000325128	22	NM_001271696,NM_001271697,NM_001271698,NM_001271699,NM_004299	ABCB7	ATP binding cassette subfamily B member 7	-3.38381	0.0220659
23231	NM_001297592,NM_001297594,NM_015187	SEL1L3	SEL1L family member 3	11.4322	0.00315383	4715	NM_001278645,NM_001278646,NM_001311168,NM_005005	NDUFB9	NADH:ubiquinone oxidoreductase subunit B9	-3.383	0.00401608
3853	NM_005554	KRT6A	keratin 6A	11.4163	0.00930176	26007	NM_015533	TKFC	triokinase and FMN cyclase	-3.38054	0.00549804
844	NM_001231	CASQ1	calsequestrin 1	11.4058	0.000212904	3801	NM_001130099,NM_001130100,NM_001318710,NM_001318711,NM_001318712,NM_001318713,NM_001318714,NM_001318715,NM_005550,NR_134678	KIFC3	kinesin family member C3	-3.37822	0.00592717
221091	NM_203422	LRRN4CL	LRRN4 C-terminal like	11.401	0.00126764	7515	NM_006297	XRCC1	X-ray repair complementing defective repair in Chinese hamster cells 1	-3.37051	0.0199859
84073	NM_032133	MYCBPAP	MYCBP associated protein	11.3995	0.000390769	55768	NM_001145293,NM_001145294,NM_001145295,NM_018297	NGLY1	N-glycanase 1	-3.37046	0.0106827
347689	NR_004053,NR_075089,NR_075090,NR_075091,NR_075092,NR_075093	SOX2-OT	SOX2 overlapping transcript	11.3979	0.002073	9922	NM_001134382,NM_014869	IQSEC1	IQ motif and Sec7 domain 1	-3.36782	0.0222556
151254	NM_001168216,NM_001168217,NM_001168221,NM_152525	ALS2CR11	amyotrophic lateral sclerosis 2 chromosome region candidate 11	11.3023	0.00068539	2962	NM_002096	GTF2F1	general transcription factor IIF subunit 1	-3.36543	0.0113828
79890	NM_001319987,NM_024832	RIN3	Ras and Rab interactor 3	11.2949	0.000387799	2969	NM_001163636,NM_001280800,NM_001518,NM_032999,NM_033000,NM_033001	GTF2I	general transcription factor IIi	-3.36101	0.0109214
101928103	NR_110292	LOC101928103	uncharacterized LOC101928103	11.2942	0.00169475	54963	NM_001193379,NM_017859,NR_126526	UCKL1	uridine-cytidine kinase 1 like 1	-3.36047	0.0126781
729359	NM_001080400	PLIN4	perilipin 4	11.2725	0.000226194	115948	NM_001302453,NM_001302454,NM_145045	CCDC151	coiled-coil domain containing 151	-3.35839	0.0155736
80071	NM_025004	CCDC15	coiled-coil domain containing 15	11.2541	6.81548e-05	10681	NM_006578,NM_016194	GNB5	G protein subunit beta 5	-3.35691	0.00297097
8911	NM_001003406,NM_021096	CACNA1I	calcium voltage-gated channel subunit alpha1 I	11.2453	0.000638601	9394	NM_004807	HS6ST1	heparan sulfate 6-O-sulfotransferase 1	-3.35206	0.0127696
2205	NM_002001	FCER1A	Fc fragment of IgE receptor Ia	11.2266	0.00119616	54662	NM_001286772,NM_018201	TBC1D13	TBC1 domain family member 13	-3.35192	0.0112885
442075	NR_103821	EMC3-AS1	EMC3 antisense RNA 1	11.2069	1.60651e-05	81848	NM_001127496,NM_001293289,NM_001293290,NM_030964	SPRY4	sprouty RTK signaling antagonist 4	-3.35169	0.0147796
8082	NM_001135823,NM_005086	SSPN	sarcospan	11.1779	1.93196e-06	54361	NM_030761	WNT4	Wnt family member 4	-3.35081	0.0459456
64411	NM_022481	ARAP3	ArfGAP with RhoGAP domain, ankyrin repeat and PH domain 3	11.1759	0.000239949	10869	NM_001199160,NM_001199161,NM_001199162,NM_006677	USP19	ubiquitin specific peptidase 19	-3.35015	0.00760155
29933	NM_001278694,NM_001278695,NM_001278696,NM_013345	GPR132	G protein-coupled receptor 132	11.1575	0.000198552	7126	NM_021137	TNFAIP1	TNF alpha induced protein 1	-3.34689	0.0032226
84941	NM_001291274,NM_032855,NR_111903,NR_111904	HSH2D	hematopoietic SH2 domain containing	11.1503	0.000116069	5725	NM_002819,NM_031990,NM_031991	PTBP1	polypyrimidine tract binding protein 1	-3.34332	0.00275452
27185	NM_001012957,NM_001012958,NM_001012959,NM_001164537,NM_001164538,NM_001164539,NM_001164540,NM_001164541,NM_001164542,NM_001164544,NM_001164545,NM_001164546,NM_001164547,NM_001164548,NM_001164549,NM_001164550,NM_001164551,NM_001164552,NM_001164553,NM_001164554,NM_001164555,NM_001164556,NM_018662	DISC1	disrupted in schizophrenia 1	11.1465	0.000310027	8449	NM_001164239,NM_003587	DHX16	DEAH-box helicase 16	-3.34315	0.00664013
125488	NM_001135993,NM_001243425,NM_001292030,NM_153211	TTC39C	tetratricopeptide repeat domain 39C	11.1463	0.000183996	6446	NM_001143676,NM_001143677,NM_001143678,NM_001291995,NM_005627	SGK1	serum/glucocorticoid regulated kinase 1	-3.343	0.0193885
253724	NR_027249	TTC41P	tetratricopeptide repeat domain 41, pseudogene	11.1244	0.000128843	729515	NM_018452	TMEM242	transmembrane protein 242	-3.34181	0.00544112
100216546	NR_039981	LINC01004	long intergenic non-protein coding RNA 1004	11.094	0.000533724	8648	NM_003743,NM_147223,NM_147233	NCOA1	nuclear receptor coactivator 1	-3.33963	0.00237849
2149	NM_001311313,NM_001992	F2R	coagulation factor II thrombin receptor	11.0629	8.11988e-05	10296	NM_001017405,NM_001297430,NM_001297431,NM_001297432,NM_001297433,NM_005882,NR_123716	MAEA	macrophage erythroblast attacher	-3.33522	0.00293709
653268	NR_126580	AGAP7P	ArfGAP with GTPase domain, ankyrin repeat and PH domain 7, pseudogene	11.0448	3.71854e-05	1106	NM_001042572,NM_001271	CHD2	chromodomain helicase DNA binding protein 2	-3.33497	0.00564873
2649	NM_001278546,NM_001489,NM_033334	NR6A1	nuclear receptor subfamily 6 group A member 1	11.0415	0.000207603	2975	NM_001286242,NM_001520	GTF3C1	general transcription factor IIIC subunit 1	-3.33255	0.010364
9976	NM_005127	CLEC2B	C-type lectin domain family 2 member B	11.0161	0.00195058	55422	NM_001079906,NM_001079907,NM_001253798,NM_001253799,NM_001253800,NM_001253801,NM_001317113,NM_001317114,NM_001317115,NM_001317116,NM_001317117,NM_001317118,NM_001317119,NM_001317120,NM_001317121,NM_018555	ZNF331	zinc finger protein 331	-3.33146	0.00800498
647024	NM_001164446	C6orf132	chromosome 6 open reading frame 132	10.9934	0.00466656	84460	NM_001011657,NM_001282400,NM_001282401	ZMAT1	zinc finger matrin-type 1	-3.33067	0.0111286
1755	NM_001320644,NM_004406,NM_007329,NM_017579	DMBT1	deleted in malignant brain tumors 1	10.9917	0.00112149	112724	NM_001145971,NM_138412,NR_027381,NR_027382	RDH13	retinol dehydrogenase 13 (all-trans/9-cis)	-3.32991	0.00383309
10003	NM_001300930,NM_005467	NAALAD2	N-acetylated alpha-linked acidic dipeptidase 2	10.9899	0.000527003	7416	NM_003374,NR_036624,NR_036625	VDAC1	voltage dependent anion channel 1	-3.32773	0.00527159
284013	NM_001144939,NM_001144940,NM_001144941,NM_182566	VMO1	vitelline membrane outer layer 1 homolog	10.9846	1.18388e-05	439921	NM_001008528,NM_001008529,NM_198530,NR_130926,NR_130927,NR_130928	MXRA7	matrix remodelling associated 7	-3.32498	0.00337431
50940	NM_001077196,NM_001077197,NM_001077358,NM_016953	PDE11A	phosphodiesterase 11A	10.9729	8.83941e-05	64064	NM_022120	OXCT2	3-oxoacid CoA-transferase 2	-3.32355	0.0391288
1756	NM_000109,NM_004006,NM_004009,NM_004010,NM_004011,NM_004012,NM_004013,NM_004014,NM_004015,NM_004016,NM_004017,NM_004018,NM_004019,NM_004020,NM_004021,NM_004022,NM_004023	DMD	dystrophin	10.9687	0.000315304	1452	NM_001025105,NM_001271741,NM_001271742,NM_001892	CSNK1A1	casein kinase 1 alpha 1	-3.31982	0.00225119
4536	YP_003024027	ND2	NADH dehydrogenase subunit 2	10.9682	0.000742329	58492	NM_021217	ZNF77	zinc finger protein 77	-3.31855	0.0303234
101929357	NR_110821	HP09053	uncharacterized LOC101929357	10.9662	0.00330698	5934	NM_001323608,NM_001323609,NM_001323610,NM_001323611,NM_005611	RBL2	retinoblastoma-like 2	-3.31851	0.015389
4535	YP_003024026	ND1	NADH dehydrogenase subunit 1	10.9623	0.000754199	5073	NM_001134477,NM_001242992,NM_002582	PARN	poly(A)-specific ribonuclease	-3.31726	0.00336602
2006	NM_000501,NM_001081752,NM_001081753,NM_001081754,NM_001081755,NM_001278912,NM_001278913,NM_001278914,NM_001278915,NM_001278916,NM_001278917,NM_001278918,NM_001278939	ELN	elastin	10.955	0.00902737	6509	NM_001193493,NM_003038	SLC1A4	solute carrier family 1 member 4	-3.31519	0.026518
5918	NM_002888,NM_206963	RARRES1	retinoic acid receptor responder 1	10.8936	0.000153922	79073	NM_024092	TMEM109	transmembrane protein 109	-3.31321	0.00854891
101928855	NR_110852	LOC101928855	uncharacterized LOC101928855	10.888	0.000153521	23786	NM_001270726,NM_001270727,NM_001270728,NM_001270729,NM_001270730,NM_001270731,NM_001270732,NM_001270733,NM_001270734,NM_001270735,NM_015367,NR_073068,NR_073069	BCL2L13	BCL2 like 13	-3.31297	0.0043063
693140	NR_030282	MIR555	microRNA 555	10.8712	0.00438873	51449	NM_016297	PCYOX1	prenylcysteine oxidase 1	-3.31184	0.0056825
7007	NM_005422	TECTA	tectorin alpha	10.8357	0.00308463	3190	NM_001318186,NM_001318187,NM_001318188,NM_002140,NM_031262,NM_031263	HNRNPK	heterogeneous nuclear ribonucleoprotein K	-3.31152	0.00865705
100271715	NM_001145451	ARHGEF33	Rho guanine nucleotide exchange factor 33	10.8315	0.000156682	79674	NM_001167911,NM_001167912,NM_001167915,NM_001167916,NM_001167917,NM_024621	VEPH1	ventricular zone expressed PH domain containing 1	-3.30986	0.00794974
255101	NM_001278295,NM_001278296,NM_152389,NM_194302	CFAP65	cilia and flagella associated protein 65	10.8087	0.00156999	54850	NM_001316936,NM_001316937,NM_001316938,NM_001316939,NM_001316940,NM_001316941,NM_001316942,NM_017703	FBXL12	F-box and leucine-rich repeat protein 12	-3.30838	0.0203728
102723780	NR_132320	LOC102723780	protein FRG1-like	10.7997	0.00257048	7538	NM_003407	ZFP36	ZFP36 ring finger protein	-3.3083	0.0178899
9732	NM_014705	DOCK4	dedicator of cytokinesis 4	10.7562	0.000110233	10904	NM_001167820,NM_001167821,NM_001167822,NM_001167823,NM_001317074,NM_001317075,NM_006698	BLCAP	bladder cancer associated protein	-3.30136	0.0128955
342132	NM_001004309	ZNF774	zinc finger protein 774	10.7497	0.000160876	2104	NM_001134285,NM_001243505,NM_001243506,NM_001243507,NM_001243509,NM_001243510,NM_001243511,NM_001243512,NM_001243513,NM_001243514,NM_001243515,NM_001243518,NM_001243519,NM_001438,NM_206594,NM_206595	ESRRG	estrogen related receptor gamma	-3.29857	0.0136753
9133	NM_004701	CCNB2	cyclin B2	10.7353	0.000211653	8904	NM_001198863,NM_003915,NM_152925,NM_152926,NM_152927,NM_152928,NR_037188	CPNE1	copine 1	-3.29675	0.0141218
102466190	NR_106779	MIR6721	microRNA 6721	10.7281	0.00230678	1660	NM_001357,NR_033302	DHX9	DEAH-box helicase 9	-3.2967	0.011318
5063	NM_001128166,NM_001128167,NM_001128168,NM_001128172,NM_001128173,NM_001324325,NM_001324326,NM_001324327,NM_001324328,NM_001324329,NM_001324330,NM_001324331,NM_001324332,NM_001324333,NM_001324334,NM_002578,NR_136740,NR_136741,NR_136742,NR_136743,NR_136744,NR_136745,NR_136746,NR_136747,NR_136748	PAK3	p21 (RAC1) activated kinase 3	10.728	0.00284068	81035	NM_130386	COLEC12	collectin subfamily member 12	-3.29595	0.0240354
83988	NM_001040624,NM_001040625,NM_001040626,NM_001040627,NM_001040628,NM_001040629,NM_001040630,NM_032041	NCALD	neurocalcin delta	10.7035	0.00143211	64224	NM_022373	HERPUD2	HERPUD family member 2	-3.29484	0.0344751
692109	NR_003057	SNORD69	small nucleolar RNA, C/D box 69	10.69	0.0014755	81545	NM_001271723,NM_030793	FBXO38	F-box protein 38	-3.2947	0.0118189
142686	NM_001142733,NM_130387	ASB14	ankyrin repeat and SOCS box containing 14	10.6675	6.14168e-05	7316	NM_021009	UBC	ubiquitin C	-3.29281	0.0209512
8609	NM_001270942,NM_001270943,NM_001270944,NM_003709,NR_073108	KLF7	Kruppel-like factor 7 (ubiquitous)	10.6098	5.10926e-05	84720	NM_001201484,NM_032634,NM_152850	PIGO	phosphatidylinositol glycan anchor biosynthesis class O	-3.28855	0.0348035
4773	NM_001136021,NM_001258292,NM_001258294,NM_001258295,NM_001258296,NM_001258297,NM_012340,NM_173091	NFATC2	nuclear factor of activated T-cells 2	10.5667	0.00153849	9054	NM_001198989,NM_021100,NR_037570	NFS1	NFS1 cysteine desulfurase	-3.28699	0.00420868
79682	NM_024629,NR_104593	CENPU	centromere protein U	10.4992	0.00031031	57636	NM_001199417	ARHGAP23	Rho GTPase activating protein 23	-3.28557	0.020027
84077	NM_001184957,NM_001184958,NM_032137	C3orf20	chromosome 3 open reading frame 20	10.4973	0.000302363	38	NM_000019	ACAT1	acetyl-CoA acetyltransferase 1	-3.28438	0.0303659
9980	NM_001320714,NM_005128	DOPEY2	dopey family member 2	10.489	0.00015404	125228	NM_001098801,NM_152352	FAM210A	family with sequence similarity 210 member A	-3.28325	0.00861906
100130934	NR_045983	ZNF663P	zinc finger protein 663, pseudogene	10.4778	0.00231649	5283	NM_004569	PIGH	phosphatidylinositol glycan anchor biosynthesis class H	-3.28146	0.0085516
474338	NR_002190	SUMO1P3	SUMO1 pseudogene 3	10.4491	0.000355417	2296	NM_001453	FOXC1	forkhead box C1	-3.28088	0.0138605
1436	NM_001288705,NM_005211,NR_109969	CSF1R	colony stimulating factor 1 receptor	10.442	9.51197e-05	10045	NM_005490	SH2D3A	SH2 domain containing 3A	-3.27983	0.0227143
22973	NR_004405	LAMB2P1	laminin subunit beta 2 pseudogene 1	10.4419	0.000135919	54802	NM_001312691,NM_001312692,NM_017646,NR_132401,NR_132402,NR_132403,NR_132404,NR_132405,NR_132406,NR_132407,NR_132408,NR_132409,NR_132410,NR_132412,NR_132413,NR_132414,NR_132415	TRIT1	tRNA isopentenyltransferase 1	-3.27972	0.010195
57705	NM_020945	WDFY4	WDFY family member 4	10.4286	0.00481944	163059	NM_001080411,NM_001308346,NM_001308348,NM_001308351,NM_001308355,NM_001308357	ZNF433	zinc finger protein 433	-3.27938	0.0436307
100169767	NR_023378	RNA5S16	RNA, 5S ribosomal 16	10.4152	0.00999447	84163	NM_001281447,NM_173537	GTF2IRD2	GTF2I repeat domain containing 2	-3.27857	0.00627538
100507178	NR_037868	SLFNL1-AS1	SLFNL1 antisense RNA 1	10.4087	9.42067e-05	3693	NM_002213	ITGB5	integrin subunit beta 5	-3.27798	0.00902927
100505549	NM_001242804	LOC100505549	uncharacterized LOC100505549	10.4076	0.00263748	10531	NM_001242307,NM_001242309,NM_014889	PITRM1	pitrilysin metallopeptidase 1	-3.27757	0.0376498
4308	NM_001252020,NM_001252024,NM_001252030,NM_002420	TRPM1	transient receptor potential cation channel subfamily M member 1	10.4039	0.000266328	10950	NM_001130914,NM_006806	BTG3	BTG family member 3	-3.2752	0.0194734
79841	NM_024783	AGBL2	ATP/GTP binding protein-like 2	10.3865	0.000622427	4122	NM_001320977,NM_006122,NR_135502,NR_135503,NR_135504	MAN2A2	mannosidase alpha class 2A member 2	-3.27364	0.00786255
3936	NM_002298	LCP1	lymphocyte cytosolic protein 1	10.3853	0.00013737	10626	NM_006470	TRIM16	tripartite motif containing 16	-3.27337	0.0388897
100422836	NR_036144	MIR3180-3	microRNA 3180-3	10.3736	0.00252538	91252	NM_001128225,NM_152264,NR_134854	SLC39A13	solute carrier family 39 member 13	-3.27235	0.0156771
344787	NM_001137674	ZNF860	zinc finger protein 860	10.307	0.000597271	130074	NM_001009993,NM_001321743,NM_001321744,NM_001321745,NM_001321746,NM_001321747,NM_001321748	FAM168B	family with sequence similarity 168 member B	-3.27114	0.00614809
23034	NM_001161576,NM_001161577,NM_015589	SAMD4A	sterile alpha motif domain containing 4A	10.3051	7.43154e-07	389524	NM_001003795	GTF2IRD2B	GTF2I repeat domain containing 2B	-3.27107	0.00567602
2305	NM_001243088,NM_001243089,NM_021953,NM_202002,NM_202003	FOXM1	forkhead box M1	10.304	0.000158688	23176	NM_001098811,NM_001098812,NM_001098813,NM_001300798,NM_001300799,NM_015146	SEPT8	septin 8	-3.26953	0.00809727
106736475	NR_133914	PCF11-AS1	PCF11 anstisense RNA 1	10.2942	0.000244412	10558	NM_001281303,NM_006415,NM_178324	SPTLC1	serine palmitoyltransferase long chain base subunit 1	-3.26753	0.00430335
50846	NM_021044	DHH	desert hedgehog	10.2639	0.000300174	55041	NM_001100623,NM_001267062,NM_001267063,NM_001267064,NM_001267065,NM_001267066,NM_001267067,NM_001267068,NM_001309448,NM_001309450,NM_001309451,NM_001309452,NM_017958	PLEKHB2	pleckstrin homology domain containing B2	-3.26589	0.00884676
100500820	NR_037428	MIR3655	microRNA 3655	10.2292	0.0127989	3337	NM_001300914,NM_001313964,NM_006145	DNAJB1	DnaJ heat shock protein family (Hsp40) member B1	-3.26579	0.0320602
100500837	NR_037401	MIR3606	microRNA 3606	10.2291	0.0127973	7159	NM_001031685,NM_005426	TP53BP2	tumor protein p53 binding protein 2	-3.26421	0.0289211
27071	NM_001306151,NM_014395	DAPP1	dual adaptor of phosphotyrosine and 3-phosphoinositides	10.219	0.000896833	10155	NM_005762	TRIM28	tripartite motif containing 28	-3.2622	0.00350526
105372493	NR_136535	LOC105372493	uncharacterized LOC105372493	10.2048	0.00046913	1738	NM_000108,NM_001289750,NM_001289751,NM_001289752	DLD	dihydrolipoamide dehydrogenase	-3.26072	0.00301523
100506127	NM_001282456,NM_001305225,NR_130990	LOC100506127	putative uncharacterized protein FLJ37770-like	10.1758	6.78827e-06	8470	NM_001145670,NM_001145671,NM_001145672,NM_001145673,NM_001145674,NM_001145675,NM_001270771,NM_003603,NM_021069	SORBS2	sorbin and SH3 domain containing 2	-3.25756	0.00646028
167555	NM_205548	FAM151B	family with sequence similarity 151 member B	10.1675	0.000837797	23014	NM_015002,NM_033624	FBXO21	F-box protein 21	-3.25662	0.0243244
148206	NM_182515,NR_117086,NR_117087,NR_117088	ZNF714	zinc finger protein 714	10.1576	0.000294468	11040	NM_006875	PIM2	Pim-2 proto-oncogene, serine/threonine kinase	-3.25378	0.00383439
9194	NM_001270622,NM_001270623,NM_004731,NR_073055,NR_073056	SLC16A7	solute carrier family 16 member 7	10.1553	0.000752558	9131	NM_001130846,NM_001130847,NM_004208,NM_145812,NR_132647	AIFM1	apoptosis inducing factor, mitochondria associated 1	-3.24983	0.00904753
101927422	NR_121184	GNA14-AS1	GNA14 antisense RNA 1	10.1551	0.000265332	220213	NM_001145373	OTUD1	OTU deubiquitinase 1	-3.24688	0.0410531
627	NM_001143805,NM_001143806,NM_001143807,NM_001143808,NM_001143809,NM_001143810,NM_001143811,NM_001143812,NM_001143813,NM_001143814,NM_001143816,NM_001709,NM_170731,NM_170732,NM_170733,NM_170734,NM_170735	BDNF	brain-derived neurotrophic factor	10.145	0.000710742	23420	NM_014287	NOMO1	NODAL modulator 1	-3.24639	0.00744882
10793	NM_021148,NR_003099	ZNF273	zinc finger protein 273	10.1196	0.000990933	89796	NM_001167738,NM_020443	NAV1	neuron navigator 1	-3.24603	0.00346732
80736	NM_001178044,NM_001178045,NM_025257	SLC44A4	solute carrier family 44 member 4	10.1163	0.000105148	6341	NM_004589	SCO1	SCO1 cytochrome c oxidase assembly protein	-3.24488	0.0177834
100169765	NR_023376	RNA5S14	RNA, 5S ribosomal 14	10.0777	0.0130161	2948	NM_000850,NM_147148,NR_024538	GSTM4	glutathione S-transferase mu 4	-3.24057	0.0129034
342184	NM_001103184,NM_001277313,NM_001277314	FMN1	formin 1	10.053	0.000344476	11167	NM_007085	FSTL1	follistatin like 1	-3.23914	0.0109539
29899	NM_001321038,NM_001321039,NM_013296	GPSM2	G-protein signaling modulator 2	10.0528	0.00174034	4791	NM_001077494,NM_001261403,NM_001288724,NM_001322934,NM_001322935,NM_002502	NFKB2	nuclear factor of kappa light polypeptide gene enhancer in B-cells 2	-3.23898	0.0236272
1080	NM_000492	CFTR	cystic fibrosis transmembrane conductance regulator (ATP-binding cassette sub-family C, member 7)	10.035	0.00364458	9342	NM_004782	SNAP29	synaptosome associated protein 29kDa	-3.23608	0.0072908
79802	NM_024746	HHIPL2	HHIP like 2	10.0171	0.00213624	9646	NM_014633	CTR9	CTR9 homolog, Paf1/RNA polymerase II complex component	-3.22998	0.00388429
387032	NM_001304506,NM_019110	ZKSCAN4	zinc finger with KRAB and SCAN domains 4	10.0159	0.000280591	23438	NM_001278731,NM_001278732,NM_012208	HARS2	histidyl-tRNA synthetase 2, mitochondrial	-3.22813	0.0056776
6954	NM_001093728,NM_001261817,NM_001261818,NM_001261819,NM_001261820,NM_001261821,NM_018679	TCP11	t-complex 11	10.0084	0.00132625	9107	NM_004685	MTMR6	myotubularin related protein 6	-3.22729	0.0225462
93654	NR_002331,NR_109980,NR_109981	ST7-AS2	ST7 antisense RNA 2	9.98457	0.00266744	84988	NM_032902	PPP1R16A	protein phosphatase 1 regulatory subunit 16A	-3.2256	0.0150035
10635	NM_001130862,NM_006479	RAD51AP1	RAD51 associated protein 1	9.98342	0.00240274	4534	NM_000252	MTM1	myotubularin 1	-3.22384	0.0499177
84166	NM_032206	NLRC5	NLR family, CARD domain containing 5	9.95766	6.845e-05	10916	NM_014599,NM_177433,NM_201222	MAGED2	MAGE family member D2	-3.22191	0.0068798
213	NM_000477	ALB	albumin	9.94581	0.00301387	6566	NM_001166496,NM_003051	SLC16A1	solute carrier family 16 member 1	-3.22137	0.00302271
101927814	NR_110930	LOC101927814	uncharacterized LOC101927814	9.9406	0.00143741	79006	NM_024042	METRN	meteorin, glial cell differentiation regulator	-3.22059	0.0426603
103344931	NR_120684	LOC103344931	uncharacterized LOC103344931	9.91674	0.001687	10963	NM_001282652,NM_001282653,NM_006819	STIP1	stress induced phosphoprotein 1	-3.21832	0.0401326
9111	NM_004688	NMI	N-myc and STAT interactor	9.90224	2.16423e-05	220001	NM_152718	VWCE	von Willebrand factor C and EGF domains	-3.21673	0.0171843
9228	NM_001277161,NM_004745	DLGAP2	discs large homolog associated protein 2	9.90154	0.00319494	55652	NM_017842	SLC48A1	solute carrier family 48 member 1	-3.21298	0.0233541
730013	NR_023387	ABCC6P2	ATP binding cassette subfamily C member 6 pseudogene 2	9.84032	0.000248092	9025	NM_003958,NM_183078,NR_046399	RNF8	ring finger protein 8	-3.20967	0.0167007
348174	NM_001136214,NM_001271197,NM_182619	CLEC18A	C-type lectin domain family 18 member A	9.83555	9.51142e-05	55228	NM_001103149,NM_018215	PNMAL1	paraneoplastic Ma antigen family-like 1	-3.20957	0.0316746
414245	NR_038373,NR_134458,NR_134459,NR_134460	DNAJC9-AS1	DNAJC9 antisense RNA 1	9.82858	0.00121025	5046	NM_001291309,NM_002570,NM_138319,NM_138322,NM_138323,NM_138324,NM_138325	PCSK6	proprotein convertase subtilisin/kexin type 6	-3.20916	0.0095047
729652	NR_135198	LOC729652	uncharacterized LOC729652	9.82524	0.000176053	55311	NM_001253792,NM_018337	ZNF444	zinc finger protein 444	-3.20802	0.0107902
101929145	NR_132103,NR_132104	PPP3CB-AS1	PPP3CB antisense RNA 1 (head to head)	9.81947	0.000415087	5824	NM_001193644,NM_002857,NR_036492,NR_036493	PEX19	peroxisomal biogenesis factor 19	-3.20611	0.0106144
148811	NM_152491,NR_135186	PM20D1	peptidase M20 domain containing 1	9.79496	0.00234483	3655	NM_000210,NM_001079818,NM_001316306	ITGA6	integrin subunit alpha 6	-3.20366	0.00688602
25939	NM_015474	SAMHD1	SAM and HD domain containing deoxynucleoside triphosphate triphosphohydrolase 1	9.7926	0.00708126	444	NM_001164750,NM_001164751,NM_001164752,NM_001164753,NM_001164754,NM_001164755,NM_001164756,NM_004318,NM_020164,NM_032466,NM_032467,NM_032468	ASPH	aspartate beta-hydroxylase	-3.20269	0.0300027
51676	NM_001202429,NM_016150	ASB2	ankyrin repeat and SOCS box containing 2	9.77088	0.0128969	64168	NM_022351	NECAB1	N-terminal EF-hand calcium binding protein 1	-3.20217	0.0260699
2218	NM_001079802,NM_001198963,NM_006731	FKTN	fukutin	9.74064	0.000386261	6548	NM_003047,NR_046474	SLC9A1	solute carrier family 9 member A1	-3.20129	0.0106031
112755	NM_052874	STX1B	syntaxin 1B	9.73598	0.00121685	665	NM_004331	BNIP3L	BCL2/adenovirus E1B 19kDa interacting protein 3-like	-3.20102	0.0042036
10008	NM_005472	KCNE3	potassium voltage-gated channel subfamily E regulatory subunit 3	9.72838	0.00331013	26273	NM_012175,NM_033406	FBXO3	F-box protein 3	-3.19648	0.00589404
79000	NM_001287490,NM_024037	AUNIP	aurora kinase A and ninein interacting protein	9.72067	0.000109917	4010	NM_001174146,NM_001174147,NM_002316	LMX1B	LIM homeobox transcription factor 1 beta	-3.19625	0.0120585
26353	NM_014365	HSPB8	heat shock protein family B (small) member 8	9.66739	0.00559857	113230	NM_001291291,NR_111941	LOC113230	uncharacterized protein LOC113230	-3.19625	0.037654
2524	NM_000511,NM_001097638	FUT2	fucosyltransferase 2	9.64088	0.000542336	84061	NM_032121	MAGT1	magnesium transporter 1	-3.19333	0.00271574
81839	NM_001172411,NM_001172412,NM_138959	VANGL1	VANGL planar cell polarity protein 1	9.63745	9.14968e-05	6047	NM_001185009,NM_001185010,NM_002938	RNF4	ring finger protein 4	-3.19285	0.00335498
83890	NM_031952,NR_125327,NR_125328,NR_125329,NR_125330	SPATA9	spermatogenesis associated 9	9.60306	0.00119324	80023	NM_001323679,NM_001323680,NM_001323681,NM_001323682,NM_001323683,NM_001323684,NM_001323685,NM_024958,NR_136649	NRSN2	neurensin 2	-3.19203	0.0134765
11155	NM_001080114,NM_001080115,NM_001080116,NM_001171610,NM_001171611,NM_007078	LDB3	LIM domain binding 3	9.59263	0.00156801	4820	NM_005385	NKTR	natural killer cell triggering receptor	-3.19127	0.0049865
127795	NM_152377	C1orf87	chromosome 1 open reading frame 87	9.58451	0.00178559	7832	NM_006763	BTG2	BTG family member 2	-3.18967	0.00650587
144535	NM_001306084	CFAP54	cilia and flagella associated 54	9.5801	8.52447e-05	16	NM_001605	AARS	alanyl-tRNA synthetase	-3.18901	0.00551177
101927811	NR_110119,NR_110120	LOC101927811	uncharacterized LOC101927811	9.57499	0.000978657	10641	NM_006545	NPRL2	NPR2-like, GATOR1 complex subunit	-3.18809	0.00958117
10100	NM_001308315,NM_001308316,NM_005725	TSPAN2	tetraspanin 2	9.57442	0.0128749	8078	NM_001098536,NM_003481	USP5	ubiquitin specific peptidase 5	-3.18743	0.00605484
100507421	NM_001195278	TMEM178B	transmembrane protein 178B	9.5687	8.90985e-05	745	NM_001127392,NM_013279	MYRF	myelin regulatory factor	-3.18421	0.0170406
55107	NM_018043,NR_030691	ANO1	anoctamin 1	9.56825	0.000679175	145783	NR_015419	LOC145783	uncharacterized LOC145783	-3.18314	0.0199319
84318	NM_001130146,NM_001130147,NM_001130148,NM_032358	CCDC77	coiled-coil domain containing 77	9.56726	0.00221904	9770	NM_014737,NM_170774	RASSF2	Ras association domain family member 2	-3.18181	0.00623621
4509	YP_003024030	ATP8	ATP synthase F0 subunit 8	9.56004	0.00142172	339665	NM_001001479,NM_001318370,NM_001318371	SLC35E4	solute carrier family 35 member E4	-3.18003	0.0239096
220	NM_000693,NM_001293815	ALDH1A3	aldehyde dehydrogenase 1 family member A3	9.5532	0.00230716	8613	NM_003713	PLPP3	phospholipid phosphatase 3	-3.17792	0.00975887
100505736	NR_120504	LOC100505736	uncharacterized LOC100505736	9.54501	0.000972727	51599	NM_001260489,NM_001260490,NM_015925,NM_205834,NM_205835	LSR	lipolysis stimulated lipoprotein receptor	-3.17681	0.00632023
161835	NM_001324338,NM_152597	FSIP1	fibrous sheath interacting protein 1	9.53057	0.00171632	170688	NR_104005	NUDT4P2	nudix hydrolase 4 pseudogene 2	-3.17678	0.00225922
9379	NM_015080,NM_138732,NM_138734	NRXN2	neurexin 2	9.52034	0.00552203	334	NM_001142276,NM_001142277,NM_001142278,NM_001243299,NM_001642,NR_024515,NR_024516	APLP2	amyloid beta precursor like protein 2	-3.17575	0.00522075
653121	NM_001040441,NM_001291496,NR_111980	ZBTB8A	zinc finger and BTB domain containing 8A	9.51794	0.00107682	100874249	NR_046909	DENND5B-AS1	DENND5B antisense RNA 1	-3.17516	0.0252732
101927768	NR_125845	LOC101927768	uncharacterized LOC101927768	9.5113	0.000912691	3032	NM_000183,NM_001281512,NM_001281513	HADHB	hydroxyacyl-CoA dehydrogenase/3-ketoacyl-CoA thiolase/enoyl-CoA hydratase (trifunctional protein), beta subunit	-3.17488	0.0109692
387882	NM_001145199	C12orf75	chromosome 12 open reading frame 75	9.50661	4.99123e-06	11104	NM_001204076,NM_007044	KATNA1	katanin catalytic subunit A1	-3.17449	0.0208152
100287846	NR_037168	LOC100287846	patched 1 pseudogene	9.49466	0.00243035	1477	NM_001033521,NM_001033522,NM_001324	CSTF1	cleavage stimulation factor subunit 1	-3.17172	0.0485475
134111	NM_001145161	UBE2QL1	ubiquitin conjugating enzyme E2 Q family like 1	9.48341	0.00189097	8314	NM_004656	BAP1	BRCA1 associated protein-1 (ubiquitin carboxy-terminal hydrolase)	-3.17118	0.0480606
100506144	NM_001195156	TMEM35B	ZMYM6 neighbor	9.47734	5.83049e-05	84861	NM_032775,NR_033825	KLHL22	kelch like family member 22	-3.17051	0.0460202
163786	NM_001304829,NM_194292	SASS6	SAS-6 centriolar assembly protein	9.47507	0.000120587	1632	NM_001178029,NM_001919	ECI1	enoyl-CoA delta isomerase 1	-3.17041	0.00673037
56673	NM_020643	C11orf16	chromosome 11 open reading frame 16	9.47038	0.000909536	157695	NM_001256113,NM_175075	TDRP	testis development related protein	-3.17022	0.0049482
57477	NM_020717,NR_027121	SHROOM4	shroom family member 4	9.45214	0.0029578	50861	NM_001276310,NM_015894,NR_075070	STMN3	stathmin 3	-3.16917	0.0140474
4067	NM_001111097,NM_002350	LYN	LYN proto-oncogene, Src family tyrosine kinase	9.45004	0.00102384	3075	NM_000186,NM_001014975	CFH	complement factor H	-3.16739	0.0098815
8519	NM_003641	IFITM1	interferon induced transmembrane protein 1	9.44673	0.00037186	6320	NM_002975	CLEC11A	C-type lectin domain family 11 member A	-3.16723	0.00814283
100422870	NR_036141	MIR3180-1	microRNA 3180-1	9.44535	0.00345698	7419	NM_001135694,NM_005662	VDAC3	voltage dependent anion channel 3	-3.16718	0.0047898
728780	NM_001276713	ANKDD1B	ankyrin repeat and death domain containing 1B	9.42814	0.000334217	27338	NM_014501	UBE2S	ubiquitin conjugating enzyme E2 S	-3.1657	0.0109129
958	NM_001250,NM_001302753,NM_001322421,NM_001322422,NM_152854,NR_126502,NR_136327	CD40	CD40 molecule	9.42396	0.000257315	51440	NM_001282396,NM_001282397,NM_016257	HPCAL4	hippocalcin like 4	-3.16508	0.035512
359821	NR_002208	MRPL42P5	mitochondrial ribosomal protein L42 pseudogene 5	9.40586	0.000731953	414777	NR_024052,NR_024053,NR_102326,NR_102327	HCG18	HLA complex group 18 (non-protein coding)	-3.16432	0.0256928
286046	NM_173683	XKR6	XK related 6	9.38316	0.00151375	192669	NM_024852,NM_177422	AGO3	argonaute 3, RISC catalytic component	-3.16338	0.0082081
5924	NM_006909	RASGRF2	Ras protein specific guanine nucleotide releasing factor 2	9.38248	0.00236481	2130	NM_001163285,NM_001163286,NM_001163287,NM_005243,NM_013986	EWSR1	EWS RNA binding protein 1	-3.16181	0.0049814
387712	NM_001242699	ENO4	enolase family member 4	9.3748	0.000395922	2622	NM_001286205,NM_001286208,NM_001286209,NM_001481	GAS8	growth arrest specific 8	-3.15961	0.00445755
10319	NM_006059	LAMC3	laminin subunit gamma 3	9.37327	0.00138488	2593	NM_000156,NM_138924	GAMT	guanidinoacetate N-methyltransferase	-3.15681	0.004348
441502	NR_002309	RPS26P11	ribosomal protein S26 pseudogene 11	9.36685	0.00183462	226	NM_000034,NM_001127617,NM_001243177,NM_184041,NM_184043	ALDOA	aldolase, fructose-bisphosphate A	-3.15496	0.00606428
101928020	NR_110291	LOC101928020	uncharacterized LOC101928020	9.34008	0.00235882	3945	NM_001174097,NM_001315537,NM_002300	LDHB	lactate dehydrogenase B	-3.15468	0.00455616
79817	NM_024761	MOB3B	MOB kinase activator 3B	9.33347	6.94734e-05	10939	NM_006796	AFG3L2	AFG3 like matrix AAA peptidase subunit 2	-3.15427	0.0033431
729633	NR_024072	MRS2P2	MRS2 pseudogene 2	9.30085	0.00014942	10241	NM_001261390,NM_001261391,NM_001261393,NM_001261395,NM_005831	CALCOCO2	calcium binding and coiled-coil domain 2	-3.15198	0.00381388
1586	NM_000102	CYP17A1	cytochrome P450 family 17 subfamily A member 1	9.29503	0.000827376	57585	NM_020825	CRAMP1	cramped chromatin regulator homolog 1	-3.15188	0.0112026
7166	NM_004179	TPH1	tryptophan hydroxylase 1	9.27926	0.00105496	114900	NM_031909	C1QTNF4	C1q and tumor necrosis factor related protein 4	-3.1503	0.0426772
57520	NM_001304840,NM_020760	HECW2	HECT, C2 and WW domain containing E3 ubiquitin protein ligase 2	9.24468	0.00279757	2947	NM_000849,NR_024537	GSTM3	glutathione S-transferase mu 3 (brain)	-3.14269	0.0353683
286437	NR_039980	LOC286437	uncharacterized LOC286437	9.24074	0.00626283	8175	NM_007165	SF3A2	splicing factor 3a subunit 2	-3.14262	0.0303557
170691	NM_139057	ADAMTS17	ADAM metallopeptidase with thrombospondin type 1 motif 17	9.24051	0.00153551	8861	NM_001113407,NM_001321612,NM_003893	LDB1	LIM domain binding 1	-3.14151	0.0371432
3127	NM_002125	HLA-DRB5	major histocompatibility complex, class II, DR beta 5	9.23656	0.016353	23197	NM_014613	FAF2	Fas associated factor family member 2	-3.13884	0.00746735
5627	NM_000313,NM_001314077	PROS1	protein S (alpha)	9.22851	0.000277294	79133	NM_001039375,NM_024120,NR_029377	NDUFAF5	NADH:ubiquinone oxidoreductase complex assembly factor 5	-3.13819	0.0359399
5027	NM_002562,NR_033948,NR_033949,NR_033950,NR_033951,NR_033952,NR_033953,NR_033954,NR_033955,NR_033956	P2RX7	purinergic receptor P2X, ligand-gated ion channel, 7	9.22684	0.000393359	11112	NM_152740	HIBADH	3-hydroxyisobutyrate dehydrogenase	-3.13813	0.00571106
3382	NM_001136020,NM_001276478,NM_004968,NM_022307	ICA1	islet cell autoantigen 1	9.21872	0.00119065	25890	NM_015429	ABI3BP	ABI family member 3 binding protein	-3.13266	0.0379659
440823	NR_003491,NR_033319,NR_033320,NR_033321	MIAT	myocardial infarction associated transcript (non-protein coding)	9.21558	0.000271203	54874	NM_001024948,NM_001164473,NM_017737	FNBP1L	formin binding protein 1 like	-3.13084	0.0159355
254158	NM_001169574,NM_152761	CXorf58	chromosome X open reading frame 58	9.2119	0.000323986	5914	NM_000964,NM_001024809,NM_001145301,NM_001145302	RARA	retinoic acid receptor alpha	-3.1307	0.0344981
10894	NM_006691	LYVE1	lymphatic vessel endothelial hyaluronan receptor 1	9.18047	0.0218428	54587	NM_001282582,NM_001282583,NM_001282584,NM_001282585,NM_032348	MXRA8	matrix-remodelling associated 8	-3.1279	0.019706
134637	NM_001286259,NM_182503	ADAT2	adenosine deaminase, tRNA specific 2	9.17309	0.000994447	26137	NM_001164342,NM_001164343,NM_001164344,NM_001164345,NM_001164346,NM_001164347,NM_015642,NR_121662	ZBTB20	zinc finger and BTB domain containing 20	-3.12641	0.0113911
10517	NM_001267585,NM_001267586,NR_051988	FBXW10	F-box and WD repeat domain containing 10	9.16814	0.000478048	613	NM_004327,NM_021574	BCR	breakpoint cluster region	-3.12104	0.011002
8564	NM_003679	KMO	kynurenine 3-monooxygenase (kynurenine 3-hydroxylase)	9.16624	0.0102515	1209	NM_001282175,NM_001282176,NM_001294	CLPTM1	cleft lip and palate associated transmembrane protein 1	-3.1189	0.0135093
2747	NM_012084	GLUD2	glutamate dehydrogenase 2	9.16495	0.000139965	147727	NR_024333	ILF3-AS1	ILF3 antisense RNA 1 (head to head)	-3.11774	0.0162611
11031	NM_006868	RAB31	RAB31, member RAS oncogene family	9.16287	7.26104e-05	4140	NM_001128918,NM_001128919,NM_001128920,NM_001128921,NM_002376	MARK3	microtubule affinity regulating kinase 3	-3.11719	0.00293883
57664	NM_001161354,NM_020904	PLEKHA4	pleckstrin homology domain containing A4	9.16016	9.58592e-06	65265	NM_023080	C8orf33	chromosome 8 open reading frame 33	-3.11508	0.0424046
83697	NM_001258426,NM_001258427,NM_001258428,NM_031467	SLC4A9	solute carrier family 4 member 9	9.14358	0.000158008	85360	NM_001300910,NM_033025	SYDE1	synapse defective Rho GTPase homolog 1	-3.11303	0.0273551
30816	NM_001130925,NM_014590	ERVW-1	endogenous retrovirus group W member 1	9.14153	0.00846566	518	NM_001002258,NM_001190329,NM_001689	ATP5G3	ATP synthase, H+ transporting, mitochondrial Fo complex subunit C3 (subunit 9)	-3.11116	0.00796611
101928846	NR_110725,NR_110726	HIPK1-AS1	HIPK1 antisense RNA 1	9.14084	0.000173412	64225	NM_001135673,NM_001308076,NM_022374,NR_024191	ATL2	atlastin GTPase 2	-3.11106	0.0234721
346653	NM_001012454,NM_001128926,NM_001290254,NM_001290255	FAM71F2	family with sequence similarity 71 member F2	9.13042	0.000197376	2590	NM_001291866,NM_004481,NR_120373	GALNT2	polypeptide N-acetylgalactosaminyltransferase 2	-3.10923	0.00270674
3606	NM_001243211,NM_001562	IL18	interleukin 18	9.11802	0.00170244	9742	NM_014714	IFT140	intraflagellar transport 140	-3.10923	0.00849518
27120	NM_001197301,NM_001197302,NM_014419	DKKL1	dickkopf like acrosomal protein 1	9.09905	9.61501e-05	51807	NM_001193414,NM_018943	TUBA8	tubulin alpha 8	-3.10752	0.0156116
339529	NR_033883	LOC339529	uncharacterized LOC339529	9.09379	0.00198014	10432	NM_001198836,NM_001198837,NM_006328	RBM14	RNA binding motif protein 14	-3.10649	0.00258471
29999	NM_020369	FSCN3	fascin actin-bundling protein 3	9.09197	0.00173226	91663	NM_001020818,NM_001020819,NM_001020820,NM_001020821,NM_001290188,NM_001290189,NM_001290190,NM_001290191,NM_001290192,NM_001290193,NM_001290194,NM_138373	MYADM	myeloid-associated differentiation marker	-3.10538	0.0149593
64067	NM_001164749,NM_001165893,NM_022123,NM_173159	NPAS3	neuronal PAS domain protein 3	9.06803	0.000339741	64847	NM_001258372,NM_001258373,NM_022827	SPATA20	spermatogenesis associated 20	-3.10278	0.00327516
102466191	NR_106794	MIR6736	microRNA 6736	9.06673	0.00296012	113178	NM_079834	SCAMP4	secretory carrier membrane protein 4	-3.10256	0.0442011
348654	NM_001130009,NM_182625	GEN1	GEN1, Holliday junction 5' flap endonuclease	9.06155	0.000493331	79085	NM_024103	SLC25A23	solute carrier family 25 member 23	-3.09984	0.0101704
84867	NM_001039970,NM_001278236,NM_001278238,NM_001278239,NM_006906,NM_032781	PTPN5	protein tyrosine phosphatase, non-receptor type 5	9.05338	0.000761143	79818	NM_024762	ZNF552	zinc finger protein 552	-3.09959	0.0472528
9033	NM_001253837,NM_016112	PKD2L1	polycystin 2 like 1, transient receptor potential cation channel	9.04353	0.00133828	79750	NM_024697	ZNF385D	zinc finger protein 385D	-3.09883	0.024533
100534611	NR_037950	TM4SF19-TCTEX1D2	TM4SF19-TCTEX1D2 readthrough (NMD candidate)	9.03839	0.00140109	84164	NM_001242906,NM_032204	ASCC2	activating signal cointegrator 1 complex subunit 2	-3.09877	0.0072662
7462	NM_014146,NM_032463,NM_032464	LAT2	linker for activation of T-cells family member 2	9.01833	0.00392337	8939	NM_003934	FUBP3	far upstream element binding protein 3	-3.09108	0.0385215
80183	NM_001286761,NM_001286762,NM_001286763,NM_001286764,NM_001286765,NM_001286766,NM_025113	KIAA0226L	KIAA0226-like	9.00308	7.78469e-05	10128	NM_133259	LRPPRC	leucine rich pentatricopeptide repeat containing	-3.0903	0.0138988
100129543	NM_001277403	ZNF730	zinc finger protein 730	8.99746	0.00350268	50848	NM_016946	F11R	F11 receptor	-3.08943	0.010786
646600	NR_126326	IGF2BP2-AS1	IGF2BP2 antisense RNA 1	8.99079	0.000321031	127281	NM_001195736,NM_001195737,NM_001195738,NM_001195740,NM_001195741,NM_152371,NR_036637,NR_036638	FAM213B	family with sequence similarity 213 member B	-3.08924	0.0111828
1592	NM_000783,NM_057157	CYP26A1	cytochrome P450 family 26 subfamily A member 1	8.98372	0.0419345	55870	NM_018489	ASH1L	ash1 (absent, small, or homeotic)-like (Drosophila)	-3.0865	0.00672921
2625	NM_001002295,NM_002051	GATA3	GATA binding protein 3	8.97576	0.00563277	65083	NM_022917,NM_139235	NOL6	nucleolar protein 6	-3.08544	0.0275548
64780	NM_001159291,NM_001286613,NM_022765	MICAL1	microtubule associated monooxygenase, calponin and LIM domain containing 1	8.95965	0.000876202	9924	NM_001127460,NM_001166279,NM_014871	PAN2	PAN2 poly(A) specific ribonuclease subunit	-3.08409	0.0293354
387758	NM_203371	FIBIN	fin bud initiation factor homolog (zebrafish)	8.95964	0.00859901	1153	NM_001280,NM_001300815,NM_001300829,NR_023312,NR_023313	CIRBP	cold inducible RNA binding protein	-3.08233	0.0222102
100996425	NR_131947,NR_131948	PRCAT47	prostate cancer-associated 47	8.95914	0.00118659	3420	NM_001258384,NM_006899,NM_174855,NR_136344	IDH3B	isocitrate dehydrogenase 3 (NAD(+)) beta	-3.08195	0.0181196
100616306	NR_039667	MIR378H	microRNA 378h	8.95548	0.00121569	81	NM_001322033,NM_004924	ACTN4	actinin alpha 4	-3.07904	0.0230605
2059	NM_004447	EPS8	epidermal growth factor receptor pathway substrate 8	8.94009	4.99326e-05	9918	NM_014865	NCAPD2	non-SMC condensin I complex subunit D2	-3.07805	0.0115122
404220	NM_001085401,NR_104463,NR_104464	C6orf201	chromosome 6 open reading frame 201	8.93913	0.00181529	55167	NM_001145417,NM_018133	MSL2	male-specific lethal 2 homolog (Drosophila)	-3.07715	0.0120107
22846	NM_014909	VASH1	vasohibin 1	8.93783	0.00564062	5050	NM_001145939,NM_001145940,NM_002573	PAFAH1B3	platelet activating factor acetylhydrolase 1b catalytic subunit 3	-3.07406	0.0363978
100132774	NR_033827	KDM4A-AS1	KDM4A antisense RNA 1	8.93502	0.00202106	118813	NM_001002261,NM_001002262,NM_001174119,NM_001174120,NM_001174121,NM_001174122,NM_144588	ZFYVE27	zinc finger FYVE-type containing 27	-3.07307	0.0170259
3909	NM_000227,NM_001127717,NM_001127718,NM_001302996,NM_198129,NR_130106	LAMA3	laminin subunit alpha 3	8.92458	0.000766998	2778	NM_000516,NM_001077488,NM_001077489,NM_001077490,NM_001309840,NM_001309842,NM_001309861,NM_001309883,NM_016592,NM_080425,NM_080426,NR_132272,NR_132273	GNAS	GNAS complex locus	-3.07229	0.0041937
100133286	NR_040084	LOC100133286	uncharacterized LOC100133286	8.91683	0.000583025	79365	NM_030762	BHLHE41	basic helix-loop-helix family member e41	-3.06913	0.0175086
100131060	NR_034014,NR_034015,NR_108106	LINC01135	long intergenic non-protein coding RNA 1135	8.91651	0.00137415	79618	NM_001135726,NM_001324382,NM_001324383,NM_001324384,NM_001324385,NM_001324386,NM_001324387,NM_001324388,NM_001324389,NM_001324390,NM_001324391,NM_001324392,NM_001324393,NM_001324394,NM_001324395,NM_024567,NR_136757,NR_136758	HMBOX1	homeobox containing 1	-3.06907	0.0237082
11037	NM_001198595,NM_006873	STON1	stonin 1	8.87816	0.00157594	92667	NM_001310338,NM_001310339,NM_052865	MGME1	mitochondrial genome maintenance exonuclease 1	-3.06848	0.00552756
64841	NM_198066	GNPNAT1	glucosamine-phosphate N-acetyltransferase 1	8.87762	2.88974e-05	22929	NM_001195602,NM_001195604,NM_012247	SEPHS1	selenophosphate synthetase 1	-3.06321	0.00535817
4519	YP_003024038	CYTB	cytochrome b	8.86275	0.00431803	5860	NM_000320,NM_001306140	QDPR	quinoid dihydropteridine reductase	-3.06291	0.00473608
219621	NM_173554	C10orf107	chromosome 10 open reading frame 107	8.83881	0.000459103	6305	NM_002972	SBF1	SET binding factor 1	-3.06125	0.032485
11157	NM_007080	LSM6	LSM6 homolog, U6 small nuclear RNA and mRNA degradation associated	8.82544	7.05305e-05	34	NM_000016,NM_001127328,NM_001286042,NM_001286043,NM_001286044	ACADM	acyl-CoA dehydrogenase, C-4 to C-12 straight chain	-3.06119	0.00728942
3984	NM_001204426,NM_002314	LIMK1	LIM domain kinase 1	8.81426	0.000191202	81558	NM_030802	FAM117A	family with sequence similarity 117 member A	-3.05862	0.026091
57451	NM_001080428,NM_001122679	TENM2	teneurin transmembrane protein 2	8.79795	0.000125402	64430	NM_022495	PCNX4	pecanex homolog 4 (Drosophila)	-3.05786	0.00623438
91860	NM_001031733,NM_001286694,NM_001286695,NM_033429,NR_104583	CALML4	calmodulin like 4	8.79562	0.000170689	4891	NM_000617,NM_001174125,NM_001174126,NM_001174127,NM_001174128,NM_001174129,NM_001174130,NR_033421,NR_033422	SLC11A2	solute carrier family 11 member 2	-3.0575	0.0167804
100170229	NM_001145641	SRRM5	serine/arginine repetitive matrix 5	8.78245	0.00925975	23213	NM_001128204,NM_001128205,NM_001128206,NM_015170,NR_132437	SULF1	sulfatase 1	-3.05637	0.0346833
200403	NM_144992	VWA3B	von Willebrand factor A domain containing 3B	8.77607	0.000951848	254427	NM_153256	PROSER2	proline and serine rich 2	-3.05592	0.0168774
9839	NM_001171653,NM_014795,NR_033258	ZEB2	zinc finger E-box binding homeobox 2	8.77123	0.00223893	170960	NM_133474	ZNF721	zinc finger protein 721	-3.05536	0.0213162
3671	NM_005545,NM_201526	ISLR	immunoglobulin superfamily containing leucine-rich repeat	8.75695	0.00627093	9520	NM_006310	NPEPPS	aminopeptidase puromycin sensitive	-3.05507	0.00716449
114897	NM_030968,NM_153372,NM_198593,NM_198594,NR_049769	C1QTNF1	C1q and tumor necrosis factor related protein 1	8.74202	0.00163002	27238	NM_015698	GPKOW	G-patch domain and KOW motifs	-3.0525	0.00743629
5452	NM_001207025,NM_001207026,NM_001247994,NM_002698	POU2F2	POU class 2 homeobox 2	8.73973	0.000163639	169792	NM_001042413,NM_152629	GLIS3	GLIS family zinc finger 3	-3.05219	0.0273848
57604	NM_001099677,NM_020844	KIAA1456	KIAA1456	8.7364	0.00376009	10520	NM_001265597,NM_001265598,NM_001265599,NM_001265600,NM_001322306,NM_006385,NM_198855,NR_049752,NR_049753,NR_049754	ZNF211	zinc finger protein 211	-3.04479	0.00741161
9294	NM_004230	S1PR2	sphingosine-1-phosphate receptor 2	8.73494	0.00183598	10524	NM_001206833,NM_006388,NM_182709,NM_182710	KAT5	lysine acetyltransferase 5	-3.04356	0.00647151
101927027	NR_110204,NR_110205,NR_110206	LOC101927027	uncharacterized LOC101927027	8.72336	0.000511979	94056	NM_032796,NR_033181	SYAP1	synapse associated protein 1	-3.0435	0.0177069
100533183	NM_001204299	ZNF664-FAM101A	filamin-interacting protein FAM101A	8.72151	0.0218868	10478	NM_001282726,NM_001282727,NM_006358,NR_104235,NR_104236,NR_104237,NR_104238	SLC25A17	solute carrier family 25 member 17	-3.04202	0.0324913
126017	NM_001004301	ZNF813	zinc finger protein 813	8.70414	0.00295897	56160	NM_138704	NSMCE3	NSE3 homolog, SMC5-SMC6 complex component	-3.04108	0.00832274
360132	NR_003949,NR_027339,NR_027340,NR_027342	FKBP9P1	FK506 binding protein 9 pseudogene 1	8.69982	8.63489e-05	1326	NM_001244134,NM_001320961,NM_005204	MAP3K8	mitogen-activated protein kinase kinase kinase 8	-3.03589	0.0217711
7161	NM_001126240,NM_001126241,NM_001126242,NM_001204184,NM_001204185,NM_001204186,NM_001204187,NM_001204188,NM_001204189,NM_001204190,NM_001204191,NM_001204192,NM_005427	TP73	tumor protein p73	8.68798	0.0057924	3993	NM_001015002,NM_001031803,NM_004524	LLGL2	LLGL2, scribble cell polarity complex component	-3.0334	0.0149256
399761	NR_003611	BMS1P5	BMS1, ribosome biogenesis factor pseudogene 5	8.6784	0.000188509	6307	NM_001017369,NM_006745	MSMO1	methylsterol monooxygenase 1	-3.03338	0.00792114
4958	NM_005014	OMD	osteomodulin	8.66502	0.000585092	23092	NM_001135608,NM_015071	ARHGAP26	Rho GTPase activating protein 26	-3.03131	0.0090357
9108	NM_004686	MTMR7	myotubularin related protein 7	8.65293	0.00198588	81562	NM_001142292,NM_001322346,NM_001322347,NM_001322350,NM_001322351,NM_001322352,NM_001322354,NM_001322355,NM_001322356,NM_030805	LMAN2L	lectin, mannose binding 2 like	-3.02932	0.0106616
102724827	NR_110543	MIATNB	MIAT neighbor (non-protein coding)	8.64887	0.000775474	256471	NM_152778	MFSD8	major facilitator superfamily domain containing 8	-3.0277	0.019696
9493	NM_001281301,NM_004856,NM_138555	KIF23	kinesin family member 23	8.64832	0.00371729	8497	NM_001304331,NM_001304332	PPFIA4	PTPRF interacting protein alpha 4	-3.02437	0.0232784
399947	NM_207645	C11orf87	chromosome 11 open reading frame 87	8.64797	0.000604889	23365	NM_001198665,NM_001301084,NM_015313	ARHGEF12	Rho guanine nucleotide exchange factor 12	-3.02358	0.0178126
131831	NM_001308234,NM_152394	ERICH6	glutamate rich 6	8.64726	0.00130759	64743	NM_001166426,NM_017883,NR_029427	WDR13	WD repeat domain 13	-3.02339	0.0158066
441457	NM_001045477,NM_001170741	NUTM2G	NUT family member 2G	8.63974	0.00193419	55745	NM_018229,NR_026895	AP5M1	adaptor related protein complex 5 mu 1 subunit	-3.02276	0.00713208
25780	NM_001139488,NM_015376,NM_170672	RASGRP3	RAS guanyl releasing protein 3	8.6342	0.000374748	6730	NM_001260502,NM_001260503,NM_014230,NR_048541	SRP68	signal recognition particle 68	-3.01899	0.0235689
387640	NM_207371	SKIDA1	SKI/DACH domain containing 1	8.6045	0.000482515	83696	NM_001160372,NM_001321646,NM_031466	TRAPPC9	trafficking protein particle complex 9	-3.01895	0.0265972
285676	NM_001178089,NM_001178090,NM_001323306,NM_001323307,NM_001323308,NM_001323309,NM_001323310,NM_182594	ZNF454	zinc finger protein 454	8.59186	0.000500012	78987	NM_001031717,NM_001077415,NM_015513	CRELD1	cysteine rich with EGF like domains 1	-3.01752	0.0311497
390927	NM_001013659	ZNF793	zinc finger protein 793	8.57243	1.54092e-05	191	NM_000687,NM_001161766,NM_001322084,NM_001322085,NM_001322086	AHCY	adenosylhomocysteinase	-3.01661	0.00821274
57639	NM_020879	CCDC146	coiled-coil domain containing 146	8.5639	0.000508835	7629	NM_001292032,NM_003427	ZNF76	zinc finger protein 76	-3.01585	0.0208556
23526	NM_001258328,NM_001282334,NM_001282335,NM_001321232,NM_012292	HMHA1	histocompatibility (minor) HA-1	8.55517	0.00174662	58516	NM_001135811,NM_001135812,NM_021238	FAM60A	family with sequence similarity 60 member A	-3.0141	0.0473081
148398	NM_152486	SAMD11	sterile alpha motif domain containing 11	8.54983	0.00655005	6617	NM_003082	SNAPC1	small nuclear RNA activating complex polypeptide 1	-3.01134	0.0390338
7292	NM_001297562,NM_003326	TNFSF4	tumor necrosis factor superfamily member 4	8.54557	0.00267698	6713	NM_003129	SQLE	squalene epoxidase	-3.0108	0.0179068
26149	NM_001317916,NM_033160,NR_134255	ZNF658	zinc finger protein 658	8.5387	0.000354133	6311	NM_001310121,NM_001310123,NM_002973,NR_132311	ATXN2	ataxin 2	-3.01015	0.00637873
6335	NM_002977	SCN9A	sodium voltage-gated channel alpha subunit 9	8.49196	0.00177434	65018	NM_032409	PINK1	PTEN induced putative kinase 1	-3.00629	0.0083748
53616	NM_001324417,NM_001324418,NM_001324419,NM_001324420,NM_001324421,NM_004194,NM_016351,NM_021721,NM_021722,NM_021723	ADAM22	ADAM metallopeptidase domain 22	8.49164	0.00222631	3156	NM_000859,NM_001130996	HMGCR	3-hydroxy-3-methylglutaryl-CoA reductase	-3.00573	0.0234746
158038	NM_001258282,NM_152570	LINGO2	leucine rich repeat and Ig domain containing 2	8.46925	0.0243534	118987	NM_173791	PDZD8	PDZ domain containing 8	-3.005	0.0106596
80725	NM_025248	SRCIN1	SRC kinase signaling inhibitor 1	8.45541	0.00218207	80279	NM_001278197,NM_001278198,NM_001278216,NM_001278217,NM_176096	CDK5RAP3	CDK5 regulatory subunit associated protein 3	-3.00348	0.0268476
387597	NM_199351	ILDR2	immunoglobulin like domain containing receptor 2	8.44887	0.00508705	3688	NM_002211,NM_033668,NM_133376	ITGB1	integrin subunit beta 1	-3.00345	0.018712
3767	NM_000525,NM_001166290	KCNJ11	potassium voltage-gated channel subfamily J member 11	8.44752	0.00657724	1958	NM_001964	EGR1	early growth response 1	-3.0023	0.0194285
79705	NM_024652	LRRK1	leucine-rich repeat kinase 1	8.43726	0.00287717	5431	NM_000938,NM_001303268,NM_001303269	POLR2B	polymerase (RNA) II subunit B	-3.00223	0.00570585
161931	NM_001145400,NM_139174	ADAD2	adenosine deaminase domain containing 2	8.43347	0.00414844	2923	NM_005313	PDIA3	protein disulfide isomerase family A member 3	-3.00155	0.00788796
100996251	NR_103777	LOC100996251	uncharacterized LOC100996251	8.43229	0.00153326	23303	NM_015254	KIF13B	kinesin family member 13B	-3.00103	0.0049025
6900	NM_005076	CNTN2	contactin 2	8.43109	0.00177054	10294	NM_005880	DNAJA2	DnaJ heat shock protein family (Hsp40) member A2	-2.99807	0.0266676
5358	NM_001136025,NM_001172335,NM_001282337,NM_001282338,NM_005032	PLS3	plastin 3	8.42759	0.00028376	10782	NM_001278734,NM_016324,NM_016325,NM_133502	ZNF274	zinc finger protein 274	-2.99591	0.025858
160140	NM_152587	C11orf65	chromosome 11 open reading frame 65	8.41367	0.00172465	23396	NM_001195733,NM_001300849,NM_012398	PIP5K1C	phosphatidylinositol-4-phosphate 5-kinase type 1 gamma	-2.99216	0.0172881
200931	NM_152672	SLC51A	solute carrier family 51 alpha subunit	8.40732	0.00251904	116447	NM_001258446,NM_001258447,NM_052963	TOP1MT	topoisomerase (DNA) I, mitochondrial	-2.99184	0.0388959
136853	NM_080744	SSC4D	scavenger receptor cysteine rich family member with 4 domains	8.40582	0.00815742	64760	NM_022749	FAM160B2	family with sequence similarity 160 member B2	-2.98847	0.0403123
653489	NM_001144013	RGPD3	RANBP2-like and GRIP domain containing 3	8.40183	0.00185307	8780	NM_003831	RIOK3	RIO kinase 3	-2.98653	0.00597494
6507	NM_001166695,NM_001166696,NM_001289939,NM_001289940,NM_004172	SLC1A3	solute carrier family 1 member 3	8.40104	0.00596044	51447	NM_001005909,NM_001005910,NM_001005911,NM_001146178,NM_001146179,NM_001190316,NM_001190317,NM_016291,NR_027437,NR_027438	IP6K2	inositol hexakisphosphate kinase 2	-2.98653	0.00705711
93986	NM_001172766,NM_001172767,NM_014491,NM_148898,NM_148899,NM_148900,NR_033766,NR_033767	FOXP2	forkhead box P2	8.39447	0.00128139	22827	NM_001136033,NM_001271096,NM_001271097,NM_001271098,NM_001271099,NM_001271100,NM_014281,NM_078480	PUF60	poly(U) binding splicing factor 60KDa	-2.9859	0.00700957
100302743	NR_028374	SNORA80B	small nucleolar RNA, H/ACA box 80B	8.37914	0.00257052	80344	NM_001163484,NM_025230,NM_181357,NR_028099,NR_028100	DCAF11	DDB1 and CUL4 associated factor 11	-2.98517	0.00748501
23166	NM_015136	STAB1	stabilin 1	8.37491	0.0108392	24138	NM_012420	IFIT5	interferon induced protein with tetratricopeptide repeats 5	-2.98486	0.0238096
134353	NM_173491	LSM11	LSM11, U7 small nuclear RNA associated	8.35127	0.00250731	2181	NM_004457,NM_203372	ACSL3	acyl-CoA synthetase long-chain family member 3	-2.98355	0.0063905
79637	NM_001304271,NM_001304272,NM_001304273,NM_024585	ARMC7	armadillo repeat containing 7	8.33806	0.000212345	1777	NM_001375	DNASE2	deoxyribonuclease II, lysosomal	-2.98221	0.00441719
2134	NM_004455	EXTL1	exostosin-like glycosyltransferase 1	8.30227	0.0014635	5445	NM_000305,NM_001018161	PON2	paraoxonase 2	-2.97942	0.0374124
1846	NM_001394,NM_057158	DUSP4	dual specificity phosphatase 4	8.29921	0.000150833	23013	NM_015001	SPEN	spen family transcriptional repressor	-2.97856	0.0259577
100132163	NR_029379	PHKA2-AS1	PHKA2 antisense RNA 1	8.28626	0.00556428	260425	NM_001142782,NM_152900	MAGI3	membrane associated guanylate kinase, WW and PDZ domain containing 3	-2.978	0.0247524
51427	NM_001013746,NM_001282359,NM_001282360,NM_016220,NR_104148,NR_104149	ZNF107	zinc finger protein 107	8.27165	0.000501385	57469	NM_020709	PNMAL2	paraneoplastic Ma antigen family-like 2	-2.97734	0.0457698
4539	YP_003024034	ND4L	NADH dehydrogenase subunit 4L	8.27145	0.0017538	51075	NM_001144012,NM_015959,NR_026593,NR_037645	TMX2	thioredoxin related transmembrane protein 2	-2.97725	0.00696756
4330	NM_002430	MN1	meningioma (disrupted in balanced translocation) 1	8.26887	0.000320362	4522	NM_005956	MTHFD1	methylenetetrahydrofolate dehydrogenase, cyclohydrolase and formyltetrahydrofolate synthetase 1	-2.97266	0.00526495
55740	NM_001008493,NM_018212	ENAH	enabled homolog (Drosophila)	8.26835	4.83612e-06	2664	NM_001493	GDI1	GDP dissociation inhibitor 1	-2.97227	0.00851829
646851	NM_001013647,NM_001291030	FAM227A	family with sequence similarity 227 member A	8.25219	9.45444e-05	1759	NM_001005336,NM_001288737,NM_001288738,NM_001288739,NM_004408	DNM1	dynamin 1	-2.97157	0.023562
144715	NM_001286531,NM_001286532,NM_001286533,NM_001286534,NM_001286535,NM_001286536,NM_152442	RAD9B	RAD9 checkpoint clamp component B	8.24662	0.00120821	7027	NM_007111,NR_026580	TFDP1	transcription factor Dp-1	-2.97117	0.00590439
400511	NR_122072	LINC01567	long intergenic non-protein coding RNA 1567	8.24172	0.00216734	9122	NM_001201546,NM_001201547,NM_001201548,NM_001201549,NM_001319220,NM_004696	SLC16A4	solute carrier family 16 member 4	-2.96995	0.00403763
199777	NM_001076675,NM_145297	ZNF626	zinc finger protein 626	8.23938	3.55683e-05	29925	NM_013334,NM_021971	GMPPB	GDP-mannose pyrophosphorylase B	-2.96762	0.0202852
100507419	NR_123723	MMP25-AS1	MMP25 antisense RNA 1	8.23591	0.000146808	4692	NM_002487	NDN	necdin, MAGE family member	-2.96717	0.00668027
114905	NM_001135170,NM_001135171,NM_031911	C1QTNF7	C1q and tumor necrosis factor related protein 7	8.23491	0.0069802	9782	NM_001194954,NM_001194955,NM_001194956,NM_001282278,NM_018834,NM_199189	MATR3	matrin 3	-2.96533	0.037002
222183	NM_001110199,NM_001291831	SRRM3	serine/arginine repetitive matrix 3	8.23136	0.00307373	6018	NM_012421	RLF	rearranged L-myc fusion	-2.96354	0.0399343
51252	NM_001122646,NM_001172667,NM_016490	FAM178B	family with sequence similarity 178 member B	8.22144	0.00043654	4041	NM_001291902,NM_002335	LRP5	LDL receptor related protein 5	-2.96135	0.00860684
4508	YP_003024031	ATP6	ATP synthase F0 subunit 6	8.2029	0.00612337	1827	NM_001285389,NM_001285391,NM_001285392,NM_001285393,NM_004414,NM_203417,NM_203418	RCAN1	regulator of calcineurin 1	-2.95973	0.0173975
304	NR_003573	ANXA2P2	annexin A2 pseudogene 2	8.19021	0.000460484	23469	NM_001290259,NM_001290260,NM_015153	PHF3	PHD finger protein 3	-2.95971	0.0173203
654364	NM_001018136,NR_037149	NME1-NME2	NME1-NME2 readthrough	8.16627	0.000963225	23175	NM_001261427,NM_001261428,NM_001261429,NM_145693	LPIN1	lipin 1	-2.95912	0.00588732
1770	NM_001372,NM_004662	DNAH9	dynein axonemal heavy chain 9	8.16371	7.68912e-05	63874	NM_022060	ABHD4	abhydrolase domain containing 4	-2.95728	0.0072754
4494	NM_001301272,NM_005949	MT1F	metallothionein 1F	8.16315	0.00578291	92255	NM_001007527	LMBRD2	LMBR1 domain containing 2	-2.95606	0.015072
3868	NM_005557	KRT16	keratin 16	8.16144	0.00900664	60487	NM_001031712	TRMT11	tRNA methyltransferase 11 homolog	-2.95264	0.036555
124925	NM_001098635,NM_001290202,NM_178860	SEZ6	seizure related 6 homolog	8.16101	0.00056187	3691	NM_000213,NM_001005619,NM_001005731,NM_001321123	ITGB4	integrin subunit beta 4	-2.95133	0.0469411
10272	NM_005860	FSTL3	follistatin like 3	8.15717	0.000197643	782	NM_000723,NM_199247,NM_199248	CACNB1	calcium voltage-gated channel auxiliary subunit beta 1	-2.94778	0.0403293
4060	NM_002345	LUM	lumican	8.15584	0.0015684	2034	NM_001430	EPAS1	endothelial PAS domain protein 1	-2.9462	0.0180306
220042	NM_145018	DDIAS	DNA damage induced apoptosis suppressor	8.12947	0.0159985	8323	NM_001164615,NM_001164616,NM_001317796,NM_003506,NR_133921	FZD6	frizzled class receptor 6	-2.94254	0.018197
2898	NM_001166247,NM_021956,NM_175768	GRIK2	glutamate ionotropic receptor kainate type subunit 2	8.11804	0.000256078	231	NM_001628	AKR1B1	aldo-keto reductase family 1, member B1 (aldose reductase)	-2.94169	0.0158149
353497	NM_181808	POLN	polymerase (DNA) nu	8.1177	0.00150465	440672	NR_002212	NUDT4P1	nudix hydrolase 4 pseudogene 1	-2.93678	0.00526511
1768	NM_001370	DNAH6	dynein axonemal heavy chain 6	8.0568	0.000307242	7355	NM_001032289,NM_001042498,NM_001282647,NM_001282648,NM_001282649,NM_001282650,NM_001282651,NM_005660	SLC35A2	solute carrier family 35 member A2	-2.93632	0.0191742
106633814	NR_132768	SNORA86	small nucleolar RNA, H/ACA box 86	8.05182	0.0253093	7374	NM_003362,NM_080911	UNG	uracil DNA glycosylase	-2.93534	0.0150266
104502416	NR_126463	FOXP1-AS1	FOXP1 antisense RNA 1	8.04019	0.000213575	8379	NM_001013836,NM_001013837,NM_001304523,NM_001304524,NM_001304525,NM_003550	MAD1L1	MAD1 mitotic arrest deficient like 1	-2.93526	0.012319
23533	NM_001142633,NM_001251851,NM_001251852,NM_001251853,NM_001251855,NM_014308	PIK3R5	phosphoinositide-3-kinase regulatory subunit 5	8.0369	0.00390639	401548	NM_001012994	SNX30	sorting nexin family member 30	-2.9338	0.0184613
267010	NR_029422	RNU12	RNA, U12 small nuclear	8.02106	0.00443516	5293	NM_005026	PIK3CD	phosphatidylinositol-4,5-bisphosphate 3-kinase catalytic subunit delta	-2.92984	0.0216266
11118	NM_001197246,NM_001197247,NM_001197248,NM_001197249,NM_007047	BTN3A2	butyrophilin subfamily 3 member A2	8.0108	0.000287981	10788	NM_001285460,NM_001285461,NM_001285462,NM_006633	IQGAP2	IQ motif containing GTPase activating protein 2	-2.9282	0.0189984
7148	NM_019105,NM_032470	TNXB	tenascin XB	8.00931	0.00116107	7158	NM_001141979,NM_001141980,NM_005657	TP53BP1	tumor protein p53 binding protein 1	-2.92463	0.0119868
23743	NM_001178005,NM_017614	BHMT2	betaine--homocysteine S-methyltransferase 2	8.00518	0.00175842	22820	NM_016128	COPG1	coatomer protein complex subunit gamma 1	-2.92371	0.00898577
255189	NM_213600,NR_033151	PLA2G4F	phospholipase A2 group IVF	8.00273	0.00409628	79039	NM_001111322,NM_024072	DDX54	DEAD-box helicase 54	-2.92302	0.019421
344887	NR_033752	LOC344887	NmrA-like family domain containing 1 pseudogene	8.00103	0.000893827	27440	NM_017829,NM_033070	CECR5	cat eye syndrome chromosome region, candidate 5	-2.92212	0.027173
23285	NM_015237	KIAA1107	KIAA1107	7.99741	0.00463376	23499	NM_012090	MACF1	microtubule-actin crosslinking factor 1	-2.92083	0.0110715
339168	NM_001320435,NM_001320436,NM_198154	TMEM95	transmembrane protein 95	7.97566	0.00139279	2288	NM_002014	FKBP4	FK506 binding protein 4	-2.92063	0.00541296
9844	NM_001039459,NM_001206480,NM_001206482,NM_014800,NM_130442,NR_038120	ELMO1	engulfment and cell motility 1	7.93905	0.000380389	23163	NM_001172703,NM_001172704,NM_001291641,NM_001291642,NM_014001,NM_138619	GGA3	golgi associated, gamma adaptin ear containing, ARF binding protein 3	-2.91959	0.0455833
284408	NR_040027,NR_040028	ZNF790-AS1	ZNF790 antisense RNA 1	7.90594	0.000984048	26130	NM_001282679,NM_001282680,NM_001282681,NM_015635	GAPVD1	GTPase activating protein and VPS9 domains 1	-2.91957	0.00717824
440348	NM_001306094	NPIPB15	nuclear pore complex interacting protein family member B15	7.89595	0.00366024	50717	NM_015726,NR_028103,NR_028104,NR_028105,NR_028106	DCAF8	DDB1 and CUL4 associated factor 8	-2.91624	0.00782194
64581	NM_022570,NM_197947,NM_197948,NM_197949,NM_197950,NM_197954,NR_125336	CLEC7A	C-type lectin domain family 7 member A	7.89286	0.0104884	2934	NM_000177,NM_001127662,NM_001127663,NM_001127664,NM_001127665,NM_001127666,NM_001127667,NM_001258029,NM_001258030,NM_198252	GSN	gelsolin	-2.91536	0.00914765
6029	NR_002715	RN7SL1	RNA, 7SL, cytoplasmic 1	7.88693	0.000526638	80222	NM_001271895,NM_001271896,NM_025150,NR_073513,NR_073514	TARS2	threonyl-tRNA synthetase 2, mitochondrial (putative)	-2.91468	0.00777222
692212	NR_003077	SNORD99	small nucleolar RNA, C/D box 99	7.88293	0.00290032	6767	NM_001278589,NM_003932	ST13	suppression of tumorigenicity 13 (colon carcinoma) (Hsp70 interacting protein)	-2.91403	0.0153037
728116	NM_001145720	ZBTB8B	zinc finger and BTB domain containing 8B	7.86578	0.000370817	8462	NM_001177716,NM_001177718,NM_003597	KLF11	Kruppel-like factor 11	-2.91359	0.0268726
100616453	NR_039835	MIR4687	microRNA 4687	7.86178	0.0329676	3482	NM_000876	IGF2R	insulin like growth factor 2 receptor	-2.90861	0.018697
699	NM_001278616,NM_001278617,NM_004336	BUB1	BUB1 mitotic checkpoint serine/threonine kinase	7.85325	0.0022612	5514	NM_002714,NR_072994	PPP1R10	protein phosphatase 1 regulatory subunit 10	-2.90728	0.0202399
27146	NM_015688	FAM184B	family with sequence similarity 184 member B	7.85188	0.000941862	221154	NM_152726	MICU2	mitochondrial calcium uptake 2	-2.90688	0.034052
100422956	NR_036142	MIR3180-2	microRNA 3180-2	7.84507	0.00833207	29924	NM_001130071,NM_001130072,NM_013333	EPN1	epsin 1	-2.90678	0.0497979
10595	NM_001308220,NM_033266	ERN2	endoplasmic reticulum to nucleus signaling 2	7.83093	0.000744742	8906	NM_001282474,NM_001282475,NM_003917	AP1G2	adaptor related protein complex 1 gamma 2 subunit	-2.9039	0.00893749
163747	NM_001110533,NM_152607	LEXM	lymphocyte expansion molecule	7.81906	0.00156398	23505	NM_015348	TMEM131	transmembrane protein 131	-2.89977	0.0285231
4919	NM_001083592,NM_005012	ROR1	receptor tyrosine kinase-like orphan receptor 1	7.81469	0.000503949	2078	NM_001136154,NM_001136155,NM_001243428,NM_001243429,NM_001243432,NM_001291391,NM_004449,NM_182918,NR_111949	ERG	v-ets avian erythroblastosis virus E26 oncogene homolog	-2.89882	0.013839
101930370	NR_134241,NR_134242	LOC101930370	uncharacterized LOC101930370	7.81158	0.00104767	100652748	NM_001290117,NM_001290118,NR_110767,NR_135475	TIMM23B	translocase of inner mitochondrial membrane 23 homolog B	-2.89712	0.0249902
105374366	NR_134664,NR_134665	LOC105374366	uncharacterized LOC105374366	7.81101	0.00649657	143458	NM_001304263,NM_001304264,NM_174902	LDLRAD3	low density lipoprotein receptor class A domain containing 3	-2.89269	0.00989748
729156	NR_003934	GTF2IRD1P1	GTF2I repeat domain containing 1 pseudogene 1	7.80133	0.000768078	64927	NM_001288615,NM_001288616,NR_109947	TTC23	tetratricopeptide repeat domain 23	-2.89268	0.0492161
151651	NM_144715	EFHB	EF-hand domain family member B	7.79388	0.00167937	55754	NM_001143958,NM_018247	TMEM30A	transmembrane protein 30A	-2.89046	0.0452734
102465464	NR_106833	MIR6775	microRNA 6775	7.79118	0.00418741	26959	NM_001244262,NM_012257	HBP1	HMG-box transcription factor 1	-2.89031	0.0292238
79838	NM_001105248,NM_001105249,NM_001261841,NM_001308161,NM_024780	TMC5	transmembrane channel like 5	7.79118	0.000754325	538	NM_000052,NM_001282224,NR_104109	ATP7A	ATPase copper transporting alpha	-2.88995	0.0356425
8492	NM_003619	PRSS12	protease, serine 12	7.78717	0.0286952	23360	NM_001318339,NM_015308	FNBP4	formin binding protein 4	-2.88675	0.0384736
90342	NM_001293083	FER1L5	fer-1 like family member 5	7.76722	0.00151282	55626	NM_001267782,NM_001267783,NM_001300731,NM_017749	AMBRA1	autophagy and beclin 1 regulator 1	-2.88433	0.0472298
125113	NM_152349	KRT222	keratin 222	7.76362	0.000217005	3675	NM_002204	ITGA3	integrin subunit alpha 3	-2.88282	0.0260554
6532	NM_001045	SLC6A4	solute carrier family 6 member 4	7.75422	0.0147857	5236	NM_001172818,NM_001172819,NM_002633	PGM1	phosphoglucomutase 1	-2.88237	0.0271815
100131205	NR_026911	RPL21P28	ribosomal protein L21 pseudogene 28	7.74629	0.000960124	81577	NM_001243650,NM_030819,NR_027398	GFOD2	glucose-fructose oxidoreductase domain containing 2	-2.88006	0.0314524
5168	NM_001040092,NM_001130863,NM_006209,NR_045555	ENPP2	ectonucleotide pyrophosphatase/phosphodiesterase 2	7.73914	0.00835353	113829	NM_080670	SLC35A4	solute carrier family 35 member A4	-2.87584	0.00903557
220963	NM_001323977,NM_001323978,NM_001323979,NM_001323980,NM_001323981,NM_194298	SLC16A9	solute carrier family 16 member 9	7.73726	0.00308379	54989	NM_014106	ZNF770	zinc finger protein 770	-2.87198	0.0166796
285195	NM_173653	SLC9A9	solute carrier family 9 member A9	7.73217	0.0342135	6464	NM_001130040,NM_001130041,NM_001202859,NM_003029,NM_183001	SHC1	SHC (Src homology 2 domain containing) transforming protein 1	-2.87104	0.0184394
389840	NM_001001671	MAP3K15	mitogen-activated protein kinase kinase kinase 15	7.73075	0.0123279	79777	NM_001135705,NM_001135706,NM_001135707,NM_001321352,NM_001321353,NM_024722	ACBD4	acyl-CoA binding domain containing 4	-2.86995	0.0317612
81027	NM_030773	TUBB1	tubulin beta 1 class VI	7.72657	0.00114729	8079	NM_005439,NR_026581	MLF2	myeloid leukemia factor 2	-2.86869	0.0340936
282997	NR_026932	PDCD4-AS1	PDCD4 antisense RNA 1	7.72608	0.0117568	84498	NM_001286379,NM_001286380,NM_001286381,NM_032448	FAM120B	family with sequence similarity 120B	-2.86668	0.0305366
123872	NM_001318756,NM_178452	DNAAF1	dynein (axonemal) assembly factor 1	7.72567	0.00320423	57062	NM_020414	DDX24	DEAD-box helicase 24	-2.86181	0.0340971
53346	NM_001144903,NM_023003	TM6SF1	transmembrane 6 superfamily member 1	7.72458	0.00424626	387856	NM_001013635	CCDC184	coiled-coil domain containing 184	-2.86152	0.0475298
79931	NM_001128843,NM_001244764,NM_024873	TNIP3	TNFAIP3 interacting protein 3	7.7059	0.00103877	8763	NM_001142401,NM_001142402,NM_001142403,NM_001142404,NM_006016	CD164	CD164 molecule	-2.86079	0.0206125
374286	NM_001282540,NM_006382	CDRT1	CMT1A duplicated region transcript 1	7.69077	0.000694446	537	NM_001183	ATP6AP1	ATPase H+ transporting accessory protein 1	-2.86049	0.00831833
100529240	NM_001202473	ZNF816-ZNF321P	ZNF816-ZNF321P readthrough	7.68457	0.00251158	5188	NM_004564	GATB	glutamyl-tRNA(Gln) amidotransferase, subunit B	-2.85784	0.0211761
123745	NM_001206670	PLA2G4E	phospholipase A2 group IVE	7.67692	0.00186602	2260	NM_001174063,NM_001174064,NM_001174065,NM_001174066,NM_001174067,NM_015850,NM_023105,NM_023106,NM_023110	FGFR1	fibroblast growth factor receptor 1	-2.85628	0.0153222
10395	NM_001164271,NM_001316668,NM_006094,NM_024767,NM_182643	DLC1	DLC1 Rho GTPase activating protein	7.67534	0.000301272	91782	NM_001317899,NM_152272	CHMP7	charged multivesicular body protein 7	-2.85557	0.0283788
2995	NM_001256584,NM_002101,NM_016815	GYPC	glycophorin C (Gerbich blood group)	7.67115	0.00129675	130872	NM_001321300,NM_001321301,NM_001321302,NM_001321303,NM_001321304,NM_001321305,NM_152392	AHSA2	AHA1, activator of heat shock 90kDa protein ATPase homolog 2 (yeast)	-2.85474	0.0481067
342897	NM_001001414	NCCRP1	non-specific cytotoxic cell receptor protein 1 homolog (zebrafish)	7.6705	0.00105371	26094	NM_001163508,NM_001163509,NM_015604,NM_181340,NM_181341	DCAF4	DDB1 and CUL4 associated factor 4	-2.85323	0.0274794
595	NM_053056	CCND1	cyclin D1	7.66524	0.000171245	2018	NM_001165924,NM_004098	EMX2	empty spiracles homeobox 2	-2.85288	0.031263
284215	NR_036489	DLGAP1-AS5	DLGAP1 antisense RNA 5	7.65288	0.00883966	221545	NM_001109938,NM_001161376,NM_145029	C6orf136	chromosome 6 open reading frame 136	-2.85282	0.0199377
629	NM_001710	CFB	complement factor B	7.64998	0.00399457	139231	NM_207318	FAM199X	family with sequence similarity 199, X-linked	-2.85194	0.0205586
7011	NM_001319035,NM_007110	TEP1	telomerase associated protein 1	7.64706	4.55385e-05	23042	NM_001285444,NM_001285445,NM_001285447,NM_001285448,NM_001285449,NM_001285450,NM_001324019,NM_001324020,NM_001324021,NM_015027	PDXDC1	pyridoxal-dependent decarboxylase domain containing 1	-2.85145	0.0127753
100507347	NR_108060,NR_108061	VIM-AS1	VIM antisense RNA 1	7.64363	0.00853639	6427	NM_001195427,NM_003016,NR_036608	SRSF2	serine/arginine-rich splicing factor 2	-2.846	0.0087298
204219	NM_001290341,NM_001290342,NM_001290343,NM_178842	CERS3	ceramide synthase 3	7.64238	0.00399262	7082	NM_001301025,NM_001301026,NM_003257,NM_175610	TJP1	tight junction protein 1	-2.84319	0.0171275
8642	NM_003737	DCHS1	dachsous cadherin-related 1	7.63572	0.00174958	55324	NM_018358	ABCF3	ATP binding cassette subfamily F member 3	-2.84145	0.0205437
255809	NM_001136482	C19orf38	chromosome 19 open reading frame 38	7.61255	0.00572196	5829	NM_001080855,NM_001243756,NM_002859,NM_025157	PXN	paxillin	-2.83544	0.0419297
130814	NM_001282710,NM_001282711,NM_001282712,NM_152391,NR_104231	PQLC3	PQ loop repeat containing 3	7.57972	1.70631e-05	10741	NM_006606	RBBP9	retinoblastoma binding protein 9	-2.83288	0.0346627
83999	NM_001039570,NM_032045	KREMEN1	kringle containing transmembrane protein 1	7.56575	0.00117823	26275	NM_014362,NM_198047	HIBCH	3-hydroxyisobutyryl-CoA hydrolase	-2.83172	0.0162577
100996447	NR_104147	LOC100996447	uncharacterized LOC100996447	7.54423	0.000606701	23363	NM_001173408,NM_001173431,NM_015311	OBSL1	obscurin-like 1	-2.8292	0.022405
100130581	NR_027412,NR_027413	LINC00910	long intergenic non-protein coding RNA 910	7.5219	0.00327831	57470	NM_020710	LRRC47	leucine rich repeat containing 47	-2.8287	0.00789954
55287	NM_001284406,NM_001284407,NM_001284408,NM_018306	TMEM40	transmembrane protein 40	7.52102	0.00118395	254170	NM_203301	FBXO33	F-box protein 33	-2.82668	0.0385646
729092	NM_001144000	AGAP5	ArfGAP with GTPase domain, ankyrin repeat and PH domain 5	7.51393	0.000292255	9440	NM_004268	MED17	mediator complex subunit 17	-2.82402	0.0148057
653162	NR_026890	RPSAP9	ribosomal protein SA pseudogene 9	7.51181	0.00727182	55827	NM_001017977,NM_001198956,NM_001198957,NM_018442	DCAF6	DDB1 and CUL4 associated factor 6	-2.82332	0.0189934
414224	NR_029396	AGAP12P	ArfGAP with GTPase domain, ankyrin repeat and PH domain 12, pseudogene	7.49641	0.00265686	9557	NM_001256336,NM_001256337,NM_001256338,NM_004284,NM_024568,NR_046070	CHD1L	chromodomain helicase DNA binding protein 1-like	-2.82293	0.0102674
4939	NM_001032731,NM_002535,NM_016817	OAS2	2'-5'-oligoadenylate synthetase 2	7.49509	0.00169367	55683	NM_001115016,NR_047653,NR_047654,NR_047655,NR_047656,NR_047657,NR_047658	KANSL3	KAT8 regulatory NSL complex subunit 3	-2.82276	0.022637
51203	NM_001243142,NM_001243143,NM_001243144,NM_001301136,NM_016359,NM_018454	NUSAP1	nucleolar and spindle associated protein 1	7.48729	0.000727689	388	NM_004040	RHOB	ras homolog family member B	-2.82161	0.0467483
100462953	NR_051980	MINOS1P1	mitochondrial inner membrane organizing system 1 pseudogene 1	7.48719	0.000346026	9692	NM_001256678,NM_001256679,NM_001256680,NM_001256681,NM_014672	KIAA0391	KIAA0391	-2.82034	0.0132296
63910	NM_001302643,NM_022082	SLC17A9	solute carrier family 17 member 9	7.48463	0.00293241	9812	NM_001142603,NM_014773	KIAA0141	KIAA0141	-2.82024	0.0117419
151636	NM_138287	DTX3L	deltex 3 like, E3 ubiquitin ligase	7.48027	0.00051797	9967	NM_001321471,NM_001321473,NM_005119	THRAP3	thyroid hormone receptor associated protein 3	-2.81833	0.010556
4995	NM_002551	OR3A2	olfactory receptor family 3 subfamily A member 2	7.47816	0.00272828	23473	NM_014296	CAPN7	calpain 7	-2.81677	0.0137439
5359	NM_021105	PLSCR1	phospholipid scramblase 1	7.47523	0.00375145	10606	NM_001079524,NM_001079525,NM_006452	PAICS	phosphoribosylaminoimidazole carboxylase; phosphoribosylaminoimidazolesuccinocarboxamide synthase	-2.816	0.0104135
220032	NM_182833	GDPD4	glycerophosphodiester phosphodiesterase domain containing 4	7.46917	0.0024471	81631	NM_022818	MAP1LC3B	microtubule associated protein 1 light chain 3 beta	-2.81515	0.0171546
80835	NM_138697,NM_177540	TAS1R1	taste 1 receptor member 1	7.46903	0.00674812	201595	NM_178862	STT3B	STT3B, catalytic subunit of the oligosaccharyltransferase complex	-2.81161	0.00895886
9586	NM_001011666,NM_004904,NM_182898,NM_182899	CREB5	cAMP responsive element binding protein 5	7.4639	0.00116545	217	NM_000690,NM_001204889	ALDH2	aldehyde dehydrogenase 2 family (mitochondrial)	-2.81149	0.0458292
9708	NM_014004,NM_032088	PCDHGA8	protocadherin gamma subfamily A, 8	7.45419	0.000677272	23351	NM_001290256,NM_001290257,NM_015299	KHNYN	KH and NYN domain containing	-2.80951	0.0147233
10699	NM_001278585,NM_001278586,NM_006587	CORIN	corin, serine peptidase	7.45278	0.000620111	5825	NM_001122674,NM_002858	ABCD3	ATP binding cassette subfamily D member 3	-2.80936	0.0201144
1577	NM_000777,NM_001190484,NM_001291829,NM_001291830,NR_033807	CYP3A5	cytochrome P450 family 3 subfamily A member 5	7.44615	0.00139796	5709	NM_002809	PSMD3	proteasome 26S subunit, non-ATPase 3	-2.80799	0.00795097
79827	NM_024769	CLMP	CXADR-like membrane protein	7.44115	0.00835482	116159	NM_001320768,NM_052954,NR_135472	CYYR1	cysteine and tyrosine rich 1	-2.80732	0.0499923
1787	NM_001321006,NM_001321007,NM_004412	TRDMT1	tRNA aspartic acid methyltransferase 1	7.44044	0.000168885	8802	NM_003849	SUCLG1	succinate-CoA ligase alpha subunit	-2.80692	0.0129551
3674	NM_000419	ITGA2B	integrin subunit alpha 2b	7.39628	0.00080691	578	NM_001188	BAK1	BCL2 antagonist/killer 1	-2.80642	0.0371794
5143	NM_000923,NM_001098818,NM_001098819,NR_040546	PDE4C	phosphodiesterase 4C	7.39605	0.000674049	51366	NM_001282873,NM_015902	UBR5	ubiquitin protein ligase E3 component n-recognin 5	-2.80561	0.00750374
64753	NM_001201372,NM_022742	CCDC136	coiled-coil domain containing 136	7.39259	0.00714049	55362	NM_001318792,NM_018426	TMEM63B	transmembrane protein 63B	-2.80452	0.0352707
245711	NM_001008779,NM_001142634,NM_182756	SPDYA	speedy/RINGO cell cycle regulator family member A	7.38384	0.00286467	8803	NM_003850	SUCLA2	succinate-CoA ligase ADP-forming beta subunit	-2.80224	0.0110081
1141	NM_000748	CHRNB2	cholinergic receptor nicotinic beta 2 subunit	7.38062	0.0028663	9240	NM_006029	PNMA1	paraneoplastic Ma antigen 1	-2.80194	0.0195343
121512	NM_001304480,NM_001304481,NM_001304483,NM_001304484,NM_139241	FGD4	FYVE, RhoGEF and PH domain containing 4	7.37679	3.48285e-05	1844	NM_004418	DUSP2	dual specificity phosphatase 2	-2.80075	0.025732
344148	NM_207363,NM_207481	NCKAP5	NCK associated protein 5	7.37617	0.0065908	26355	NM_014367	FAM162A	family with sequence similarity 162 member A	-2.79626	0.0111434
100132057	NR_111930	LOC100132057	phosphodiesterase 4D interacting protein pseudogene	7.36481	0.00619804	11319	NM_001135752,NM_001135753,NM_007265,NR_024203	ECD	ecdysoneless cell cycle regulator	-2.79549	0.0107694
105377348	NR_131185,NR_131186	LOC105377348	uncharacterized LOC105377348	7.34802	0.000332821	10483	NM_001172745,NM_001172746,NM_006363,NM_032985,NM_032986	SEC23B	Sec23 homolog B, coat complex II component	-2.79448	0.0129001
162073	NM_001034841,NR_028028	ITPRIPL2	inositol 1,4,5-trisphosphate receptor interacting protein-like 2	7.34531	7.35747e-05	100271836	NR_027155	SMG1P3	SMG1 pseudogene 3	-2.79429	0.0260867
150084	NM_001080444	IGSF5	immunoglobulin superfamily member 5	7.33335	0.00780812	23710	NM_031412	GABARAPL1	GABA type A receptor associated protein like 1	-2.7931	0.00875408
143244	NM_001099692	EIF5AL1	eukaryotic translation initiation factor 5A-like 1	7.32958	0.00306171	55900	NM_001012320,NM_001289181,NM_001289182,NM_001289183,NM_001289184,NM_001289185,NM_001289186,NM_001289187,NM_001289188,NM_001289189,NM_001289190,NM_001289191,NM_001289192,NM_018443,NM_018675,NR_110322	ZNF302	zinc finger protein 302	-2.79184	0.0178981
340533	NM_001008537	KIAA2022	KIAA2022	7.32387	0.0295836	54870	NM_001320580,NM_001320581,NM_001320582,NM_001320583,NM_001320584,NM_001320585,NM_017730,NM_198880	QRICH1	glutamine rich 1	-2.79161	0.00697143
113452	NM_033504	TMEM54	transmembrane protein 54	7.31945	0.0042968	7869	NM_001005914,NM_001290060,NM_001290061,NM_001290062,NM_001290063,NM_004636,NR_110697	SEMA3B	semaphorin 3B	-2.79054	0.015658
4621	NM_002470	MYH3	myosin, heavy chain 3, skeletal muscle, embryonic	7.31704	0.000393099	9885	NM_001278649,NM_014835,NM_144498	OSBPL2	oxysterol binding protein like 2	-2.78782	0.00672175
5521	NM_001271899,NM_001271900,NM_001271948,NM_181674,NM_181675,NM_181676,NM_181677,NM_181678,NR_073526,NR_073527	PPP2R2B	protein phosphatase 2 regulatory subunit B, beta	7.30744	0.0111928	10724	NM_001142434,NM_012215	MGEA5	meningioma expressed antigen 5 (hyaluronidase)	-2.7874	0.0191373
147660	NM_001099694	ZNF578	zinc finger protein 578	7.30265	0.00479869	6879	NM_005642	TAF7	TATA-box binding protein associated factor 7	-2.7846	0.0230973
27345	NM_014505	KCNMB4	potassium calcium-activated channel subfamily M regulatory beta subunit 4	7.3006	0.00253867	2746	NM_001318900,NM_001318901,NM_001318902,NM_001318904,NM_001318905,NM_001318906,NM_005271	GLUD1	glutamate dehydrogenase 1	-2.78412	0.0173888
7482	NM_001291880,NM_004185,NM_024494	WNT2B	Wnt family member 2B	7.25444	0.00194282	23062	NM_015044	GGA2	golgi associated, gamma adaptin ear containing, ARF binding protein 2	-2.78364	0.0186046
399473	NM_001042522,NR_073032	SPRED3	sprouty related EVH1 domain containing 3	7.24329	0.00659899	85365	NM_033087,NR_024532	ALG2	ALG2, alpha-1,3/1,6-mannosyltransferase	-2.78353	0.0462983
255488	NM_182757	RNF144B	ring finger protein 144B	7.24285	4.00054e-05	81608	NM_001134937,NM_001134938,NM_030917	FIP1L1	factor interacting with PAPOLA and CPSF1	-2.78209	0.0363224
153768	NM_138492,NM_182960,NM_205846	PRELID2	PRELI domain containing 2	7.2396	0.00169715	6185	NM_001135771,NM_001324299,NM_001324301,NM_001324302,NM_001324303,NM_001324304,NM_001324305,NM_001324306,NM_002951	RPN2	ribophorin II	-2.78186	0.0136683
340895	NM_001142308	MALRD1	MAM and LDL receptor class A domain containing 1	7.23487	0.000776005	80349	NM_001303247,NM_001303248,NM_025234	WDR61	WD repeat domain 61	-2.77676	0.0183273
56964	NM_001284395,NM_001284396,NM_020212	WDR93	WD repeat domain 93	7.23008	0.000948071	220729	NR_003266	LOC220729	succinate dehydrogenase complex flavoprotein subunit A pseudogene	-2.77588	0.0157597
567	NM_004048	B2M	beta-2-microglobulin	7.22563	7.91493e-05	1774	NM_001009932,NM_001009933,NM_001009934,NM_001303620,NM_006730	DNASE1L1	deoxyribonuclease I-like 1	-2.7748	0.0226971
200916	NM_001099645,NM_001320451,NR_135259	RPL22L1	ribosomal protein L22 like 1	7.2195	0.000367579	8139	NM_022041	GAN	gigaxonin	-2.77467	0.0484752
285116	NR_077058	AHCTF1P1	AT-hook containing transcription factor 1 pseudogene 1	7.21758	0.00411532	5469	NM_004774	MED1	mediator complex subunit 1	-2.77261	0.0326464
2562	NM_000814,NM_001191320,NM_001191321,NM_001278631,NM_021912,NR_103801	GABRB3	gamma-aminobutyric acid type A receptor beta3 subunit	7.20864	0.00315409	23670	NM_001135820,NM_013390	TMEM2	transmembrane protein 2	-2.76924	0.0362727
729975	NR_034159	LINC01530	long intergenic non-protein coding RNA 1530	7.20813	0.00055907	64432	NM_022497,NR_135246,NR_135247	MRPS25	mitochondrial ribosomal protein S25	-2.76809	0.0214041
80036	NM_001007470,NM_001007471,NM_020952,NM_024971,NM_206944,NM_206945,NM_206946,NM_206947,NM_206948	TRPM3	transient receptor potential cation channel subfamily M member 3	7.19619	0.00151493	9727	NM_001142272,NM_014700	RAB11FIP3	RAB11 family interacting protein 3	-2.76781	0.0288793
50944	NM_016148	SHANK1	SH3 and multiple ankyrin repeat domains 1	7.18784	0.00235394	64110	NM_022149	MAGEF1	MAGE family member F1	-2.7659	0.0115661
439949	NR_036502,NR_036503	PRKCQ-AS1	PRKCQ antisense RNA 1	7.18502	0.00242745	8864	NM_022817	PER2	period circadian clock 2	-2.76487	0.0195948
140771	NR_024007	SMCR5	Smith-Magenis syndrome chromosome region, candidate 5 (non-protein coding)	7.1831	0.00979645	2110	NM_001281737,NM_001281738,NM_004453	ETFDH	electron transfer flavoprotein dehydrogenase	-2.76464	0.0162852
102724105	NR_125345	ZNF528-AS1	ZNF528 antisense RNA 1	7.16776	0.00457261	2521	NM_001170634,NM_001170937,NM_004960,NR_028388	FUS	FUS RNA binding protein	-2.76344	0.0105097
79658	NM_024605	ARHGAP10	Rho GTPase activating protein 10	7.16706	0.000702038	23321	NM_001130067,NM_001302692,NM_001302693,NM_001302694,NM_015271	TRIM2	tripartite motif containing 2	-2.76286	0.0247568
2825	NM_001098199,NM_001261452,NM_001261453,NM_001261454,NM_001261455,NM_005279	GPR1	G protein-coupled receptor 1	7.1563	0.00448855	8019	NM_007371	BRD3	bromodomain containing 3	-2.76268	0.0284364
256236	NR_002798	NAPSB	napsin B aspartic peptidase, pseudogene	7.14963	0.00204851	6934	NM_001146274,NM_001146283,NM_001146284,NM_001146285,NM_001146286,NM_001198525,NM_001198526,NM_001198527,NM_001198528,NM_001198529,NM_001198530,NM_001198531,NM_030756	TCF7L2	transcription factor 7 like 2	-2.76191	0.0153006
100129792	NM_001134848	CCDC152	coiled-coil domain containing 152	7.12042	0.000682184	54682	NM_018050	MANSC1	MANSC domain containing 1	-2.75859	0.0214249
4512	YP_003024028	COX1	cytochrome c oxidase subunit I	7.11736	0.00566714	25829	NM_001195071,NM_001195072,NM_012264	TMEM184B	transmembrane protein 184B	-2.75598	0.0112515
57619	NM_020859	SHROOM3	shroom family member 3	7.11518	0.00299171	727936	NM_001080393	GXYLT2	glucoside xylosyltransferase 2	-2.7557	0.0148141
399671	NM_001220484,NM_203309	HEATR4	HEAT repeat containing 4	7.08363	0.000350384	473	NM_001042681,NM_001042682,NM_012102	RERE	arginine-glutamic acid dipeptide repeats	-2.75474	0.0246534
27136	NM_014429	MORC1	MORC family CW-type zinc finger 1	7.0745	0.00171179	1399	NM_005207	CRKL	v-crk avian sarcoma virus CT10 oncogene homolog-like	-2.75384	0.00956519
1829	NM_001943	DSG2	desmoglein 2	7.07416	0.000602718	9921	NM_014868	RNF10	ring finger protein 10	-2.75317	0.0197513
100874054	NR_051960	FALEC	focally amplified long non-coding RNA in epithelial cancer	7.0622	0.00304978	29071	NM_001011551,NM_152692	C1GALT1C1	C1GALT1 specific chaperone 1	-2.75289	0.0135652
163071	NM_001301062,NM_153608	ZNF114	zinc finger protein 114	7.06055	0.00358627	90120	NM_001256526,NM_152833,NR_134506	C9orf69	chromosome 9 open reading frame 69	-2.75284	0.0480593
144321	NM_001270396,NM_152436,NR_072995	GLIPR1L2	GLI pathogenesis-related 1 like 2	7.05352	0.00891059	255743	NM_001033047,NM_001184690,NM_001184691,NM_001184692,NM_001184693	NPNT	nephronectin	-2.75255	0.0338264
2259	NM_001321931,NM_001321932,NM_001321933,NM_001321934,NM_001321935,NM_001321936,NM_001321937,NM_001321938,NM_001321939,NM_001321940,NM_001321941,NM_001321942,NM_001321943,NM_001321944,NM_001321945,NM_001321946,NM_001321947,NM_001321948,NM_001321949,NM_004115,NM_175929	FGF14	fibroblast growth factor 14	7.05286	0.00229202	58513	NM_001258374,NM_001258375,NM_001258376,NM_021235,NR_047665,NR_047666	EPS15L1	epidermal growth factor receptor pathway substrate 15-like 1	-2.75175	0.0285277
101927667	NR_110718,NR_110719,NR_110720	LINC01535	long intergenic non-protein coding RNA 1535	7.05271	0.00739809	54503	NM_001001483,NM_019028	ZDHHC13	zinc finger DHHC-type containing 13	-2.75014	0.0107611
79958	NM_001290331,NM_024898	DENND1C	DENN domain containing 1C	7.04779	0.00535646	1384	NM_000755,NM_001257363	CRAT	carnitine O-acetyltransferase	-2.74861	0.0302038
837	NM_001225,NM_033306	CASP4	caspase 4	7.04482	0.000778093	6651	NM_001291411,NM_001291412,NM_032195,NM_138927,NR_103797	SON	SON DNA binding protein	-2.74837	0.0152617
26256	NM_001308231,NM_012189,NM_138643,NM_138644,NM_153768,NM_153769,NM_153770	CABYR	calcium binding tyrosine phosphorylation regulated	7.04361	0.0114827	51754	NM_001042589,NM_001042590,NM_016446	TMEM8B	transmembrane protein 8B	-2.74804	0.0200906
164045	NM_001017975	HFM1	HFM1, ATP-dependent DNA helicase homolog	7.04343	0.00117874	2697	NM_000165	GJA1	gap junction protein alpha 1	-2.74797	0.030893
976	NM_001025160,NM_001784,NM_078481	ADGRE5	adhesion G protein-coupled receptor E5	7.02934	8.17502e-05	56181	NM_001099625,NM_001099626,NM_001099627,NM_019557	MTFR1L	mitochondrial fission regulator 1 like	-2.74534	0.0134291
6452	NM_001122681,NM_001145855,NM_001145856,NM_003023	SH3BP2	SH3 domain binding protein 2	6.99113	0.00127434	5394	NM_001001998,NM_002685	EXOSC10	exosome component 10	-2.74429	0.0141301
7549	NM_001017396,NM_001282398,NM_001291604,NM_001291605,NM_021088	ZNF2	zinc finger protein 2	6.98149	0.000399941	54778	NM_001270528,NM_001270529,NM_001270530,NM_017610	RNF111	ring finger protein 111	-2.74406	0.0286512
58484	NM_001199138,NM_001199139,NM_001302504,NM_021209	NLRC4	NLR family, CARD domain containing 4	6.97926	0.00829024	57480	NM_001029884	PLEKHG1	pleckstrin homology and RhoGEF domain containing G1	-2.74187	0.0124443
440307	NR_104604	TTLL13P	tubulin tyrosine ligase like 13, pseudogene	6.97905	0.00591486	57231	NM_001297614,NM_001304479,NM_020468,NM_153816	SNX14	sorting nexin 14	-2.74157	0.012372
55320	NM_018353	MIS18BP1	MIS18 binding protein 1	6.97622	0.000359154	23648	NM_001009955,NM_018070,NM_145716	SSBP3	single stranded DNA binding protein 3	-2.74018	0.0274071
200879	NM_139248	LIPH	lipase H	6.96684	0.00264747	5069	NM_002581	PAPPA	pappalysin 1	-2.7389	0.0177039
100132215	NR_027069,NR_033389	LOC100132215	uncharacterized LOC100132215	6.96462	0.00154251	11124	NM_007051	FAF1	Fas associated factor 1	-2.73638	0.00749036
101243545	NR_102265	LOC101243545	uncharacterized LOC101243545	6.95615	0.00393152	6988	NM_022171	TCTA	T-cell leukemia translocation altered	-2.73549	0.00751328
10791	NM_006634	VAMP5	vesicle associated membrane protein 5	6.95336	0.000170306	5869	NM_001252036,NM_001252037,NM_002868	RAB5B	RAB5B, member RAS oncogene family	-2.73375	0.0148337
101927559	NR_125739	CEBPB-AS1	CEBPB antisense RNA 1	6.94137	0.0174662	55308	NM_001320522,NM_001320525,NM_001320526,NM_001320527,NM_018332,NR_135296	DDX19A	DEAD-box helicase 19A	-2.73314	0.016505
4547	NM_000253,NM_001300785	MTTP	microsomal triglyceride transfer protein	6.94044	0.0050991	10947	NM_001134296,NM_006803	AP3M2	adaptor related protein complex 3 mu 2 subunit	-2.73192	0.0440498
120863	NM_001319310,NM_001319311,NM_152317,NR_135073	DEPDC4	DEP domain containing 4	6.93593	0.000578744	2271	NM_000143	FH	fumarate hydratase	-2.73172	0.013198
399664	NM_001174118,NM_203304	MEX3D	mex-3 RNA binding family member D	6.92012	0.000721225	4947	NM_001301302,NM_002537	OAZ2	ornithine decarboxylase antizyme 2	-2.72591	0.0128834
57547	NM_020787	ZNF624	zinc finger protein 624	6.91937	0.0153822	79932	NM_024874	KIAA0319L	KIAA0319 like	-2.72586	0.0108737
1010	NM_001317227,NM_001317228,NM_004061	CDH12	cadherin 12	6.91753	0.0379025	56270	NM_019613	WDR45B	WD repeat domain 45B	-2.72491	0.0144142
4908	NM_001102654,NM_002527	NTF3	neurotrophin 3	6.90615	0.0122613	10949	NM_006805	HNRNPA0	heterogeneous nuclear ribonucleoprotein A0	-2.72462	0.0248013
4540	YP_003024036	ND5	NADH dehydrogenase subunit 5	6.87598	0.00505068	54922	NM_017805	RASIP1	Ras interacting protein 1	-2.72287	0.0439951
375611	NM_001167962,NM_001321787,NM_198999,NM_206883,NM_206884,NM_206885,NR_120441,NR_120442,NR_120443,NR_135801,NR_135802	SLC26A5	solute carrier family 26 member 5	6.86803	0.0129747	83464	NM_001145646,NM_031301	APH1B	aph-1 homolog B, gamma secretase subunit	-2.72165	0.0370762
128153	NM_138796	SPATA17	spermatogenesis associated 17	6.86709	0.025905	5163	NM_001278549,NM_002610,NR_103729,NR_103731	PDK1	pyruvate dehydrogenase kinase 1	-2.72161	0.0250323
100130890	NM_001195131	TSTD3	thiosulfate sulfurtransferase (rhodanese)-like domain containing 3	6.85294	0.000597713	5510	NM_001282409,NM_001282410,NM_001282411,NM_001282412,NM_001282413,NM_001282414,NM_002712	PPP1R7	protein phosphatase 1 regulatory subunit 7	-2.71888	0.0123455
205251	NR_027063	LINC00116	long intergenic non-protein coding RNA 116	6.84881	0.00123508	1595	NM_000786,NM_001146152	CYP51A1	cytochrome P450 family 51 subfamily A member 1	-2.71541	0.0100048
2979	NM_002098	GUCA1B	guanylate cyclase activator 1B	6.84735	0.0153558	6576	NM_001256534,NM_001287387,NM_005984,NR_046298	SLC25A1	solute carrier family 25 member 1	-2.71382	0.0150452
443	NM_000049,NM_001128085	ASPA	aspartoacylase	6.84062	0.00646578	9828	NM_014786	ARHGEF17	Rho guanine nucleotide exchange factor 17	-2.71149	0.0311142
101	NM_001109,NM_001164489,NM_001164490	ADAM8	ADAM metallopeptidase domain 8	6.83844	0.00251931	2800	NM_002077	GOLGA1	golgin A1	-2.71123	0.0247
9590	NM_005100,NM_144497	AKAP12	A-kinase anchoring protein 12	6.82645	0.00187387	4782	NM_001245002,NM_001245004,NM_001245005,NM_005597,NM_205843	NFIC	nuclear factor I C	-2.70941	0.0264148
79788	NM_024733	ZNF665	zinc finger protein 665	6.80931	0.00688338	79970	NR_027788,NR_027789	ZNF767P	zinc finger family member 767, pseudogene	-2.70824	0.0452914
57644	NM_020884	MYH7B	myosin, heavy chain 7B, cardiac muscle, beta	6.80353	0.000794496	8545	NM_001008390,NM_001195308,NM_003663	CGGBP1	CGG triplet repeat binding protein 1	-2.70771	0.0167986
1907	NM_001302269,NM_001956,NR_126098	EDN2	endothelin 2	6.80338	0.0380627	604	NM_001130845,NM_001134738,NM_001706	BCL6	B-cell CLL/lymphoma 6	-2.70765	0.0244965
51294	NM_016580	PCDH12	protocadherin 12	6.79815	0.00125352	140459	NM_001202403,NM_017873,NM_177999	ASB6	ankyrin repeat and SOCS box containing 6	-2.70439	0.0177208
10981	NM_006834	RAB32	RAB32, member RAS oncogene family	6.78497	0.000105658	64210	NM_001289403,NM_001289404,NM_001289405,NM_022362	MMS19	MMS19 homolog, cytosolic iron-sulfur assembly component	-2.70312	0.0285457
7068	NM_000461,NM_001128176,NM_001128177,NM_001252634	THRB	thyroid hormone receptor beta	6.78104	0.000241505	51292	NM_001002000,NM_001002001,NM_001002002,NM_001283021,NM_001283022,NM_001283023,NM_016576,NR_104265	GMPR2	guanosine monophosphate reductase 2	-2.70041	0.0119298
2159	NM_000504,NM_001312674,NM_001312675	F10	coagulation factor X	6.76955	0.00912841	9819	NM_001303264,NM_014779,NR_130136	TSC22D2	TSC22 domain family member 2	-2.69987	0.0362926
80896	NM_001200050,NM_001200051,NM_001200052,NM_001200056,NM_030769	NPL	N-acetylneuraminate pyruvate lyase (dihydrodipicolinate synthase)	6.7667	0.000909156	6596	NM_001318934,NM_001318935,NM_003071,NM_139048	HLTF	helicase-like transcription factor	-2.69741	0.011211
645644	NR_024492	FLJ42627	uncharacterized LOC645644	6.76658	0.000870612	26020	NM_014045	LRP10	LDL receptor related protein 10	-2.69713	0.01107
144100	NM_175058	PLEKHA7	pleckstrin homology domain containing A7	6.76141	0.00154945	54386	NM_018975	TERF2IP	TERF2 interacting protein	-2.69496	0.0355276
347744	NM_001145020,NR_026736,NR_026737	C6orf52	chromosome 6 open reading frame 52	6.75684	0.00720421	2852	NM_001039966,NM_001098201,NM_001505	GPER1	G protein-coupled estrogen receptor 1	-2.69119	0.0313142
283208	NM_001288748,NM_182904,NR_110031	P4HA3	prolyl 4-hydroxylase subunit alpha 3	6.72025	0.00143493	388610	NM_001013642	TRNP1	TMF1-regulated nuclear protein 1	-2.69108	0.034962
283140	NR_126004	LOC283140	uncharacterized LOC283140	6.72014	0.00549399	9091	NM_004204,NM_148920	PIGQ	phosphatidylinositol glycan anchor biosynthesis class Q	-2.68896	0.0457064
100506299	NR_110153,NR_110154	ID2-AS1	ID2 antisense RNA 1 (head to head)	6.70349	0.00121378	54913	NM_017793	RPP25	ribonuclease P/MRP subunit p25	-2.68571	0.0479654
729603	NR_003288	LOC729603	calcineurin like EF-hand protein 1 pseudogene	6.6873	0.00175464	145567	NM_001010854,NM_001320421	TTC7B	tetratricopeptide repeat domain 7B	-2.68339	0.0347277
101929524	NR_109946	LOC101929524	uncharacterized LOC101929524	6.68356	0.00339731	114757	NM_134268	CYGB	cytoglobin	-2.68239	0.029107
143686	NM_001271594,NM_144665	SESN3	sestrin 3	6.66997	0.000153906	2820	NM_000408,NM_001083112	GPD2	glycerol-3-phosphate dehydrogenase 2	-2.6819	0.0291273
10638	NM_006542	SPHAR	S-phase response (cyclin related)	6.6622	0.0259682	55347	NM_001272069,NM_018394,NR_073570,NR_073571	ABHD10	abhydrolase domain containing 10	-2.68026	0.00968794
2150	NM_005242	F2RL1	F2R like trypsin receptor 1	6.66073	0.00423018	4594	NM_000255	MUT	methylmalonyl-CoA mutase	-2.67776	0.0206835
100379571	NR_037803	BACE1-AS	BACE1 antisense RNA	6.65767	0.00483736	129642	NM_001321265,NM_001321266,NM_001321267,NM_138799,NR_135598,NR_135599,NR_135600,NR_135601,NR_135602,NR_135603,NR_135604,NR_135605,NR_135606	MBOAT2	membrane bound O-acyltransferase domain containing 2	-2.67735	0.0342916
9633	NM_001039656,NM_004923	TESMIN	testis expressed metallothionein like protein	6.64582	0.00894371	6709	NM_001130438,NM_001195532,NM_003127	SPTAN1	spectrin alpha, non-erythrocytic 1	-2.67581	0.015548
2200	NM_000138	FBN1	fibrillin 1	6.63663	0.00335289	728609	NR_003263	SDHAP3	succinate dehydrogenase complex flavoprotein subunit A pseudogene 3	-2.67358	0.0440567
56169	NM_031415	GSDMC	gasdermin C	6.62551	0.00145918	9820	NM_001168370,NM_014780	CUL7	cullin 7	-2.67117	0.0190105
100506658	NM_001205254,NM_001205255,NM_002538	OCLN	occludin	6.62338	0.000684165	5250	NM_002635,NM_005888,NM_213611	SLC25A3	solute carrier family 25 member 3	-2.67101	0.0130351
140894	NM_001207076,NM_001304367,NM_080834,NR_130714	CNBD2	cyclic nucleotide binding domain containing 2	6.6112	0.003225	103	NM_001025107,NM_001111,NM_001193495,NM_015840,NM_015841	ADAR	adenosine deaminase, RNA-specific	-2.67031	0.0151885
84140	NM_001201543,NM_032180,NR_037710	FAM161A	family with sequence similarity 161 member A	6.60351	0.000813011	22884	NM_014023	WDR37	WD repeat domain 37	-2.67003	0.0263903
83714	NM_031474	NRIP2	nuclear receptor interacting protein 2	6.60006	0.00124414	51495	NM_016395	HACD3	3-hydroxyacyl-CoA dehydratase 3	-2.66974	0.0150447
100132815	NR_103741,NR_103742	IPO5P1	importin 5 pseudogene 1	6.59105	0.00145439	4076	NM_005898,NM_203364	CAPRIN1	cell cycle associated protein 1	-2.66869	0.0280201
93663	NM_033515	ARHGAP18	Rho GTPase activating protein 18	6.57903	6.88988e-05	1998	NM_001276457,NM_001276458,NM_001276459,NM_006874,NM_201999	ELF2	E74 like ETS transcription factor 2	-2.66749	0.00997521
100271722	NR_027036	LINC00899	long intergenic non-protein coding RNA 899	6.57767	0.00322611	25792	NM_001131015,NM_001131016,NM_001131017,NM_001131018,NM_001257975,NM_001257976,NM_012127	CIZ1	CDKN1A interacting zinc finger protein 1	-2.66741	0.0376292
441155	NM_001271675	LOC441155	zinc finger CCCH-type domain-containing-like	6.5537	0.0146943	10318	NM_001252385,NM_001252386,NM_001252390,NM_001252391,NM_001252392,NM_001252393,NM_001258454,NM_001258455,NM_001258456,NM_006058	TNIP1	TNFAIP3 interacting protein 1	-2.66659	0.0105608
100616530	NR_038201,NR_038202,NR_038203,NR_038204,NR_038205,NR_038206,NR_038207,NR_038208,NR_038209	C8orf37-AS1	C8orf37 antisense RNA 1	6.53235	0.00589447	9159	NM_004716	PCSK7	proprotein convertase subtilisin/kexin type 7	-2.66653	0.0407414
5345	NM_000934,NM_001165920,NM_001165921	SERPINF2	serpin family F member 2	6.51772	0.0231515	23354	NM_015302	HAUS5	HAUS augmin like complex subunit 5	-2.6656	0.0447573
645191	NM_001101391	LINGO3	leucine rich repeat and Ig domain containing 3	6.51704	0.0066253	157638	NM_174911	FAM84B	family with sequence similarity 84 member B	-2.6652	0.024014
342945	NM_001321116,NM_001321117,NM_181846	ZSCAN22	zinc finger and SCAN domain containing 22	6.51273	0.000195602	6721	NM_004599,NR_103834	SREBF2	sterol regulatory element binding transcription factor 2	-2.66379	0.0324958
26270	NM_018438	FBXO6	F-box protein 6	6.50486	0.000944669	8731	NM_001308263,NM_003799	RNMT	RNA guanine-7 methyltransferase	-2.65967	0.0132635
51816	NM_001282225,NM_001282226,NM_001282227,NM_001282228,NM_001282229,NM_177405	CECR1	cat eye syndrome chromosome region, candidate 1	6.48989	0.00722876	84939	NM_032853,NR_024247	MUM1	melanoma associated antigen (mutated) 1	-2.65899	0.016313
29969	NM_001166345,NM_001166346,NM_199072	MDFIC	MyoD family inhibitor domain containing	6.4893	3.58472e-05	7536	NM_001178030,NM_001178031,NM_004630,NM_201995,NM_201997,NM_201998,NR_033649,NR_033650	SF1	splicing factor 1	-2.65632	0.0276184
646	NM_001301206,NM_001717	BNC1	basonuclin 1	6.47269	0.0251901	2063	NM_005234	NR2F6	nuclear receptor subfamily 2 group F member 6	-2.65446	0.0221531
22854	NM_001113226,NM_001113228,NM_001312688,NM_014917	NTNG1	netrin G1	6.46869	0.00695537	6838	NM_001278942,NM_006753,NR_103874	SURF6	surfeit 6	-2.65185	0.0240459
7552	NM_021998	ZNF711	zinc finger protein 711	6.46289	0.00599408	9375	NM_004800	TM9SF2	transmembrane 9 superfamily member 2	-2.65121	0.0123644
26040	NM_001130110,NM_015559	SETBP1	SET binding protein 1	6.46244	8.42211e-05	84918	NM_032832	LRP11	LDL receptor related protein 11	-2.6511	0.0402624
5565	NM_005399,NR_103870,NR_103871	PRKAB2	protein kinase AMP-activated non-catalytic subunit beta 2	6.45807	0.000644374	25891	NM_001001991,NM_001282675,NM_001282676,NM_015430	PAMR1	peptidase domain containing associated with muscle regeneration 1	-2.6509	0.0418284
8857	NM_003890	FCGBP	Fc fragment of IgG binding protein	6.44856	0.0191521	79135	NM_024122,NR_026545	APOO	apolipoprotein O	-2.6502	0.041081
378706	NR_027260	RN7SL2	RNA, 7SL, cytoplasmic 2	6.44763	0.00164163	79068	NM_001080432	FTO	fat mass and obesity associated	-2.64944	0.0460884
6423	NM_003013	SFRP2	secreted frizzled-related protein 2	6.42172	0.0229297	9778	NM_001100590,NM_014743	KIAA0232	KIAA0232	-2.64929	0.0177205
100190986	NR_024456	LOC100190986	uncharacterized LOC100190986	6.39596	0.000602882	400027	NR_028408	LINC00938	long intergenic non-protein coding RNA 938	-2.64809	0.0391148
3344	NM_002158	FOXN2	forkhead box N2	6.39423	0.00125572	322	NM_001164,NM_001257319,NM_001257320,NM_001257321,NM_001257323,NM_001257325,NM_001257326,NM_145689,NR_047512	APBB1	amyloid beta precursor protein binding family B member 1	-2.64805	0.0265703
92126	NM_032160	DSEL	dermatan sulfate epimerase-like	6.39383	0.00225645	57205	NM_020453	ATP10D	ATPase phospholipid transporting 10D (putative)	-2.64804	0.0153392
23255	NM_015210	MTCL1	microtubule crosslinking factor 1	6.38624	0.00588233	7205	NM_003302	TRIP6	thyroid hormone receptor interactor 6	-2.64424	0.0199095
8759	NR_036636	ADAM1A	ADAM metallopeptidase domain 1A (pseudogene)	6.38586	0.0167199	55785	NM_018351	FGD6	FYVE, RhoGEF and PH domain containing 6	-2.64338	0.0166696
100287177	NR_130728,NR_130729	EML2-AS1	EML2 antisense RNA 1	6.37415	0.0031723	6760	NM_001007559,NM_001308201,NM_005637	SS18	SS18, nBAF chromatin remodeling complex subunit	-2.64141	0.0189034
1644	NM_000790,NM_001082971,NM_001242886,NM_001242887,NM_001242888,NM_001242889,NM_001242890	DDC	dopa decarboxylase	6.37181	0.00379053	51606	NM_015941,NM_213619,NM_213620	ATP6V1H	ATPase H+ transporting V1 subunit H	-2.64091	0.0126979
2791	NM_004126	GNG11	G protein subunit gamma 11	6.35885	0.00165744	55288	NM_001033566,NM_001033567,NM_001033568,NM_001288754,NM_001288755,NM_001288758,NM_018307,NR_110083	RHOT1	ras homolog family member T1	-2.64024	0.0162885
2028	NM_001977	ENPEP	glutamyl aminopeptidase	6.35523	0.024863	22822	NM_007350	PHLDA1	pleckstrin homology like domain family A member 1	-2.64005	0.0392298
100527950	NR_037633,NR_037634,NR_037635,NR_037636,NR_037637	GJA9-MYCBP	GJA9-MYCBP readthrough	6.35207	0.0134253	8031	NM_001145260,NM_001145261,NM_001145262,NM_001145263,NM_005437	NCOA4	nuclear receptor coactivator 4	-2.63891	0.0155809
752	NM_005892	FMNL1	formin like 1	6.35205	0.0125972	10099	NM_001168412,NM_005724,NM_198902	TSPAN3	tetraspanin 3	-2.63859	0.0132085
246181	NR_040288,NR_040289	AKR7L	aldo-keto reductase family 7-like (gene/pseudogene)	6.34914	0.00616979	11216	NM_007202	AKAP10	A-kinase anchoring protein 10	-2.63814	0.0157274
775	NM_000719,NM_001129827,NM_001129829,NM_001129830,NM_001129831,NM_001129832,NM_001129833,NM_001129834,NM_001129835,NM_001129836,NM_001129837,NM_001129838,NM_001129839,NM_001129840,NM_001129841,NM_001129842,NM_001129843,NM_001129844,NM_001129846,NM_001167623,NM_001167624,NM_001167625,NM_199460	CACNA1C	calcium voltage-gated channel subunit alpha1 C	6.34096	0.00019585	8440	NM_001004720,NM_001004722,NM_003581	NCK2	NCK adaptor protein 2	-2.63482	0.0172295
105377102	NR_135535	LOC105377102	uncharacterized LOC105377102	6.30142	0.00425812	4190	NM_001199111,NM_001199112,NM_001316374,NM_005917	MDH1	malate dehydrogenase 1	-2.63323	0.0172281
283143	NR_034148	LINC00900	long intergenic non-protein coding RNA 900	6.29628	0.00223295	9451	NM_001313915,NM_004836	EIF2AK3	eukaryotic translation initiation factor 2 alpha kinase 3	-2.63158	0.0420443
7047	NM_003241	TGM4	transglutaminase 4	6.29016	0.00963906	3321	NM_001007237,NM_001542	IGSF3	immunoglobulin superfamily member 3	-2.62932	0.0272736
392862	NM_001145118	GRID2IP	Grid2 interacting protein	6.28789	0.00572923	4924	NM_006184	NUCB1	nucleobindin 1	-2.62618	0.0207794
140883	NM_080764,NR_130642,NR_130643	ZNF280B	zinc finger protein 280B	6.28387	0.0107845	64645	NM_033055	MFSD14A	major facilitator superfamily domain containing 14A	-2.62529	0.0411369
9452	NM_001171581,NM_004867	ITM2A	integral membrane protein 2A	6.27521	0.0343386	131474	NM_001098502,NM_144636	CHCHD4	coiled-coil-helix-coiled-coil-helix domain containing 4	-2.62302	0.0220466
55796	NM_001170701,NM_001170702,NM_001170703,NM_001170704,NM_018388,NM_133486	MBNL3	muscleblind like splicing regulator 3	6.26736	0.00672099	14	NM_001087,NM_001302545	AAMP	angio associated migratory cell protein	-2.62079	0.018244
100505942	NR_104656	LOC100505942	uncharacterized LOC100505942	6.26583	0.000830562	9666	NM_014648	DZIP3	DAZ interacting zinc finger protein 3	-2.62059	0.0401936
283692	NR_046096	CPEB1-AS1	CPEB1 antisense RNA 1	6.25928	0.000882323	7417	NM_001184783,NM_001184823,NM_001324087,NM_001324088,NM_001324089,NM_001324090,NM_003375	VDAC2	voltage dependent anion channel 2	-2.61874	0.0166512
441072	NR_102755	FLJ31104	uncharacterized LOC441072	6.25675	0.00147463	7375	NM_001251877,NM_003363,NM_199443	USP4	ubiquitin specific peptidase 4	-2.61859	0.0167106
9866	NM_014818	TRIM66	tripartite motif containing 66	6.25111	0.00572305	9584	NM_001242599,NM_001242600,NM_001323422,NM_001323423,NM_001323424,NM_004902,NM_184234,NR_040722,NR_040723,NR_040724,NR_136587	RBM39	RNA binding motif protein 39	-2.61361	0.0410591
340706	NM_001272046,NM_001320804	VWA2	von Willebrand factor A domain containing 2	6.24067	0.000951639	65082	NM_022916	VPS33A	VPS33A, CORVET/HOPS core subunit	-2.60866	0.0359693
221468	NM_001162900,NM_001286401,NM_145316,NR_104442,NR_104443	TMEM217	transmembrane protein 217	6.2225	0.00593699	8663	NM_001037808,NM_001199142,NM_001267574,NM_001286478,NM_003752	EIF3C	eukaryotic translation initiation factor 3 subunit C	-2.60665	0.0145125
8618	NM_003716,NM_183393,NM_183394	CADPS	Ca2+ dependent secretion activator	6.2222	0.00929898	10486	NM_006366	CAP2	CAP, adenylate cyclase-associated protein, 2 (yeast)	-2.60623	0.0415641
5077	NM_000438,NM_001127366,NM_013942,NM_181457,NM_181458,NM_181459,NM_181460,NM_181461	PAX3	paired box 3	6.22126	0.035749	79987	NM_153366	SVEP1	sushi, von Willebrand factor type A, EGF and pentraxin domain containing 1	-2.6057	0.0233768
7678	NM_001243740,NM_001297567,NM_001297568,NM_001297569,NM_003431	ZNF124	zinc finger protein 124	6.22115	0.000679598	55178	NM_001317947,NM_018146	MRM3	mitochondrial rRNA methyltransferase 3	-2.60563	0.048348
3667	NM_005544	IRS1	insulin receptor substrate 1	6.21991	0.00603353	23161	NM_015132	SNX13	sorting nexin 13	-2.6033	0.0467818
57182	NM_001167882,NM_020337	ANKRD50	ankyrin repeat domain 50	6.21479	0.00263432	57515	NM_020755	SERINC1	serine incorporator 1	-2.59809	0.0303637
646278	NR_037599	PDCD6IPP2	PDCD6IP pseudogene 2	6.21374	0.00188705	7511	NM_001167604,NM_001324128,NM_001324131,NM_001324132,NM_001324133,NM_001324134,NM_001324135,NM_001324136,NM_020383	XPNPEP1	X-prolyl aminopeptidase (aminopeptidase P) 1, soluble	-2.59721	0.0136802
100125288	NM_001103167	ZGLP1	zinc finger, GATA-like protein 1	6.21263	0.0116718	10965	NM_006821,NR_046028	ACOT2	acyl-CoA thioesterase 2	-2.59236	0.0121936
10218	NM_021146	ANGPTL7	angiopoietin like 7	6.20971	0.0247716	5321	NM_001311193,NM_024420	PLA2G4A	phospholipase A2 group IVA	-2.59107	0.0285719
285955	NM_175064	SPDYE1	speedy/RINGO cell cycle regulator family member E1	6.20598	0.00660964	4643	NM_004998	MYO1E	myosin IE	-2.58966	0.027303
4501	NM_005952	MT1X	metallothionein 1X	6.20454	0.0073848	7128	NM_001270507,NM_001270508,NM_006290	TNFAIP3	TNF alpha induced protein 3	-2.58938	0.0155927
55888	NM_001288590,NM_001288591,NM_001288592,NM_018651,NM_025169	ZKSCAN7	zinc finger with KRAB and SCAN domains 7	6.19887	0.0162074	54462	NM_001284240,NM_001284241,NM_001284242,NM_001284243,NM_018999	CCSER2	coiled-coil serine rich protein 2	-2.58656	0.0111162
3991	NM_005357	LIPE	lipase E, hormone sensitive type	6.19544	0.0027049	10404	NM_016134	CPQ	carboxypeptidase Q	-2.58496	0.0336435
105370203	NR_135318	LOC105370203	uncharacterized LOC105370203	6.18911	0.00704555	1017	NM_001290230,NM_001798,NM_052827	CDK2	cyclin-dependent kinase 2	-2.58351	0.0140503
6580	NM_003057,NM_153187	SLC22A1	solute carrier family 22 member 1	6.18811	0.0050803	9813	NM_014774	EFCAB14	EF-hand calcium binding domain 14	-2.58328	0.0350046
3635	NM_001017915,NM_005541	INPP5D	inositol polyphosphate-5-phosphatase D	6.17112	0.0114676	26995	NM_015679	TRUB2	TruB pseudouridine synthase family member 2	-2.57928	0.0343486
387590	NR_001591	TPTEP1	transmembrane phosphatase with tensin homology pseudogene 1	6.16991	0.00371267	728689	NM_001099661,NM_001317856,NM_001317857	EIF3CL	eukaryotic translation initiation factor 3 subunit C-like	-2.57895	0.0149599
6671	NM_003112	SP4	Sp4 transcription factor	6.16665	0.000302635	90864	NM_001324081,NM_080861	SPSB3	splA/ryanodine receptor domain and SOCS box containing 3	-2.57721	0.0419343
285266	NR_040100	ENTPD3-AS1	ENTPD3 antisense RNA 1	6.15538	0.00379069	1315	NM_001144061,NM_001144062,NM_016451	COPB1	coatomer protein complex subunit beta 1	-2.57702	0.0213031
729737	NR_039983	LOC729737	uncharacterized LOC729737	6.13393	0.00371771	60343	NM_001171132,NM_001171133,NM_001171134,NM_001282311,NM_001282312,NM_021806	FAM3A	family with sequence similarity 3 member A	-2.57684	0.0191682
4046	NM_001013253,NM_001013254,NM_001013255,NM_001242932,NM_001289005,NM_002339	LSP1	lymphocyte-specific protein 1	6.13342	0.000442942	9792	NM_014755	SERTAD2	SERTA domain containing 2	-2.57615	0.0418913
2196	NM_001447	FAT2	FAT atypical cadherin 2	6.13146	0.015616	26011	NM_001098816	TENM4	teneurin transmembrane protein 4	-2.57477	0.0421203
3141	NM_000411,NM_001242784,NM_001242785	HLCS	holocarboxylase synthetase	6.10952	0.00119967	64223	NM_001199173,NM_001199174,NM_001199175,NM_022372	MLST8	MTOR associated protein, LST8 homolog	-2.57371	0.0186506
101929066	NR_125429,NR_125430	LOC101929066	uncharacterized LOC101929066	6.10374	0.000757515	10521	NM_001098504,NM_006386	DDX17	DEAD-box helicase 17	-2.57247	0.0402869
89932	NM_173462	PAPLN	papilin, proteoglycan-like sulfated glycoprotein	6.09623	0.00473518	56897	NM_020135,NM_130395	WRNIP1	Werner helicase interacting protein 1	-2.57106	0.0196733
3489	NM_002178	IGFBP6	insulin-like growth factor binding protein 6	6.07604	0.0211095	1195	NM_001162407,NM_004071,NR_027855,NR_027856	CLK1	CDC like kinase 1	-2.57103	0.0401834
9722	NM_001126060,NM_001164757,NM_014697	NOS1AP	nitric oxide synthase 1 adaptor protein	6.07392	0.00028216	79573	NM_001122835,NM_024525	TTC13	tetratricopeptide repeat domain 13	-2.57082	0.0490286
2070	NM_001301012,NM_001301013,NM_004100,NM_172103,NM_172105	EYA4	EYA transcriptional coactivator and phosphatase 4	6.07216	0.00973596	5295	NM_001242466,NM_181504,NM_181523,NM_181524	PIK3R1	phosphoinositide-3-kinase regulatory subunit 1	-2.57016	0.0282799
79998	NM_001115116,NM_024933	ANKRD53	ankyrin repeat domain 53	6.05981	0.00497246	55353	NM_018407	LAPTM4B	lysosomal protein transmembrane 4 beta	-2.57008	0.0218906
57335	NM_001130842,NM_001288642,NM_001288643,NM_001288644,NM_001288645,NM_001288646,NM_001288647,NM_001288648,NM_001288649,NM_020652	ZNF286A	zinc finger protein 286A	6.05889	0.000100699	5298	NM_001198773,NM_001198774,NM_001198775,NM_002651	PI4KB	phosphatidylinositol 4-kinase beta	-2.56939	0.0176003
124944	NM_001142798,NM_001142799,NM_174893	C17orf49	chromosome 17 open reading frame 49	6.05855	0.00303798	11168	NM_001128217,NM_001317898,NM_001317900,NM_021144,NM_033222	PSIP1	PC4 and SFRS1 interacting protein 1	-2.5688	0.0248495
400236	NR_036500	FOXN3-AS1	FOXN3 antisense RNA 1	6.0522	0.0030574	8897	NM_021090,NM_153050,NM_153051	MTMR3	myotubularin related protein 3	-2.56565	0.0153195
54811	NM_001130031,NM_001130032,NM_001300885,NM_017656	ZNF562	zinc finger protein 562	6.04664	9.91843e-05	60684	NM_021942,NM_199053	TRAPPC11	trafficking protein particle complex 11	-2.56272	0.0426629
91862	NM_001017967,NM_001271329,NM_052858	MARVELD3	MARVEL domain containing 3	6.04635	0.00157025	55210	NM_001170535,NM_001170536,NM_018188	ATAD3A	ATPase family, AAA domain containing 3A	-2.56242	0.021386
103504734	NR_128710	MIR1244-4	microRNA 1244-4	6.04575	0.00573692	78994	NM_001320464,NM_024031	PRR14	proline rich 14	-2.55995	0.0471373
55876	NM_001042471,NM_001165958,NM_001165959,NM_018530	GSDMB	gasdermin B	6.04146	0.00545367	57214	NM_001293298,NM_001293304,NM_018689	CEMIP	cell migration inducing hyaluronan binding protein	-2.55947	0.0370374
401093	NR_027037,NR_027038	MBNL1-AS1	MBNL1 antisense RNA 1	6.03654	0.00305713	785	NM_000726,NM_001005746,NM_001005747,NM_001145798,NM_001320722	CACNB4	calcium voltage-gated channel auxiliary subunit beta 4	-2.55787	0.0487303
64288	NM_001135215,NM_001135216,NM_001243241,NM_001243242,NM_001243243,NM_001243244,NM_030899,NM_145909	ZSCAN31	zinc finger and SCAN domain containing 31	6.03534	0.00343742	821	NM_001024649,NM_001746	CANX	calnexin	-2.55778	0.0349745
84417	NM_032411	C2orf40	chromosome 2 open reading frame 40	6.02482	0.0263774	57584	NM_020824	ARHGAP21	Rho GTPase activating protein 21	-2.55762	0.0425535
5648	NM_001031849,NM_001879,NM_139125,NR_033519	MASP1	mannan binding lectin serine peptidase 1	6.01962	0.00552459	9814	NM_001007467,NM_001258325,NM_001258326,NM_001258327,NM_014775	SFI1	SFI1 centrin binding protein	-2.55569	0.0258885
127707	NM_152375	KLHDC7A	kelch domain containing 7A	6.01792	0.00364769	137872	NM_144650	ADHFE1	alcohol dehydrogenase, iron containing 1	-2.55488	0.0442084
3115	NM_002121	HLA-DPB1	major histocompatibility complex, class II, DP beta 1	6.01477	0.00435999	9391	NM_004804	CIAO1	cytosolic iron-sulfur assembly component 1	-2.55464	0.0306711
23108	NM_001100398,NM_015085	RAP1GAP2	RAP1 GTPase activating protein 2	6.01077	0.0091337	23608	NM_001145125,NM_001291663,NM_013446,NR_117084	MKRN1	makorin ring finger protein 1	-2.55336	0.0240665
145508	NM_152446	CEP128	centrosomal protein 128	6.01025	0.00209495	323	NM_001166050,NM_001166051,NM_001166052,NM_001166053,NM_001166054,NM_004307,NM_173075	APBB2	amyloid beta precursor protein binding family B member 2	-2.55315	0.0175108
8483	NM_003613	CILP	cartilage intermediate layer protein	5.99982	0.00190517	8560	NM_001321541,NM_001321542,NM_003676	DEGS1	delta(4)-desaturase, sphingolipid 1	-2.5504	0.0198501
8743	NM_001190942,NM_001190943,NM_003810,NR_033994	TNFSF10	tumor necrosis factor superfamily member 10	5.99394	0.00628049	27429	NM_001321727,NM_001321728,NM_013247,NM_145074,NR_135769,NR_135770,NR_135771,NR_135772	HTRA2	HtrA serine peptidase 2	-2.54909	0.0377496
3077	NM_000410,NM_001300749,NM_139003,NM_139004,NM_139006,NM_139007,NM_139008,NM_139009,NM_139010,NM_139011	HFE	hemochromatosis	5.98851	0.00139776	90411	NM_001171506,NM_001171507,NM_001171508,NM_001171509,NM_001171510,NM_001171511,NM_139279	MCFD2	multiple coagulation factor deficiency 2	-2.54746	0.0385563
57097	NM_001286521,NM_001286522,NM_020367,NR_104461	PARP11	poly(ADP-ribose) polymerase family member 11	5.98817	0.00103206	7297	NM_003331	TYK2	tyrosine kinase 2	-2.54719	0.0375484
57000	NR_103560	GSN-AS1	GSN antisense RNA 1	5.96408	0.00287621	6832	NM_001301683,NM_001323584,NM_001323585,NM_001323586,NM_001323587,NM_001323588,NM_003171,NR_136626,NR_136627	SUPV3L1	Suv3 like RNA helicase	-2.54593	0.0475131
153657	NM_001317949,NM_144725	TTC23L	tetratricopeptide repeat domain 23-like	5.9584	0.00883834	26225	NM_001037174,NM_012097,NM_177985	ARL5A	ADP ribosylation factor like GTPase 5A	-2.54449	0.0198764
92597	NM_001244766,NM_001244767,NM_173468	MOB1B	MOB kinase activator 1B	5.95834	0.000644788	523	NM_001690	ATP6V1A	ATPase H+ transporting V1 subunit A	-2.54354	0.027524
79852	NM_001142886,NM_024794	EPHX3	epoxide hydrolase 3	5.95424	0.00634558	8863	NM_001289861,NM_001289862,NM_001289863,NM_001289864,NM_016831	PER3	period circadian clock 3	-2.54316	0.0201699
1001	NM_001317195,NM_001317196,NM_001793	CDH3	cadherin 3	5.95344	0.00714324	4790	NM_001165412,NM_001319226,NM_003998	NFKB1	nuclear factor of kappa light polypeptide gene enhancer in B-cells 1	-2.54188	0.0434962
134728	NM_001010844	IRAK1BP1	interleukin 1 receptor associated kinase 1 binding protein 1	5.94326	0.00800489	10270	NM_005858	AKAP8	A-kinase anchoring protein 8	-2.54187	0.0293327
284406	NM_001321917,NM_001321918,NM_001321919,NM_133466	ZFP82	ZFP82 zinc finger protein	5.93772	0.000498154	5993	NM_000449,NM_001025603	RFX5	regulatory factor X5	-2.54118	0.0362903
8736	NM_003803,NM_019856	MYOM1	myomesin 1	5.91016	0.00380361	2021	NM_004435	ENDOG	endonuclease G	-2.54022	0.0289002
374650	NR_003246	GOLGA6L5P	golgin A6 family-like 5, pseudogene	5.90283	0.00124975	85027	NM_032947	SMIM3	small integral membrane protein 3	-2.53772	0.0250443
2191	NM_001291807,NM_004460	FAP	fibroblast activation protein alpha	5.89934	0.0106963	10522	NM_001293634,NM_021008	DEAF1	DEAF1, transcription factor	-2.53757	0.0352163
79633	NM_001291285,NM_001291303,NM_024582	FAT4	FAT atypical cadherin 4	5.89849	0.00845681	5754	NM_001270398,NM_002821,NM_152880,NM_152881,NM_152882,NR_072997,NR_072998	PTK7	protein tyrosine kinase 7	-2.53694	0.030165
254102	NM_001099409	EHBP1L1	EH domain binding protein 1 like 1	5.89648	0.00875125	5118	NM_002593	PCOLCE	procollagen C-endopeptidase enhancer	-2.53527	0.030601
286207	NM_001012502	CFAP157	cilia and flagella associated protein 157	5.87927	0.00164294	253959	NM_001283043,NM_001283044,NM_014990,NM_194301	RALGAPA1	Ral GTPase activating protein catalytic alpha subunit 1	-2.53517	0.0269543
4538	YP_003024035	ND4	NADH dehydrogenase subunit 4	5.87289	0.010415	6421	NM_005066,NR_136702,NR_136703	SFPQ	splicing factor proline/glutamine-rich	-2.53239	0.0252796
132720	NM_152400	C4orf32	chromosome 4 open reading frame 32	5.86469	0.000474009	55751	NM_018241	TMEM184C	transmembrane protein 184C	-2.53171	0.0331148
51192	NM_001040138,NM_016326,NM_016951,NM_181640,NM_181641	CKLF	chemokine-like factor	5.86204	0.00213354	7009	NM_001098576,NM_003217	TMBIM6	transmembrane BAX inhibitor motif containing 6	-2.53049	0.0341201
150709	NM_144708	ANKAR	ankyrin and armadillo repeat containing	5.86068	0.00485993	116151	NM_080821	FAM210B	family with sequence similarity 210 member B	-2.52965	0.0216777
729857	NM_001078170	RGPD2	RANBP2-like and GRIP domain containing 2	5.84847	0.00951839	26065	NM_001114093,NM_015578	LSM14A	LSM14A mRNA processing body assembly factor	-2.52879	0.0225453
165186	NM_001321538,NM_001321539,NM_199280	FAM179A	family with sequence similarity 179 member A	5.84683	0.00160501	55276	NM_018290	PGM2	phosphoglucomutase 2	-2.52871	0.0463596
124817	NM_173478	CNTD1	cyclin N-terminal domain containing 1	5.84435	0.0010818	27102	NM_001134335,NM_014413	EIF2AK1	eukaryotic translation initiation factor 2 alpha kinase 1	-2.52794	0.017458
6990	NM_006520	DYNLT3	dynein light chain Tctex-type 3	5.83176	4.06064e-05	55930	NM_018728	MYO5C	myosin VC	-2.52509	0.0143895
56131	NM_018938	PCDHB4	protocadherin beta 4	5.82942	0.039144	55186	NM_001104647,NM_018155	SLC25A36	solute carrier family 25 member 36	-2.52459	0.0177004
116832	NM_052969	RPL39L	ribosomal protein L39 like	5.80528	0.00137142	387680	NM_001005751,NM_001291398	FAM21A	family with sequence similarity 21 member A	-2.52328	0.0265057
3956	NM_002305	LGALS1	lectin, galactoside binding soluble 1	5.80462	0.000124856	284129	NM_001166347,NM_001166348,NM_001166349,NM_173626	SLC26A11	solute carrier family 26 member 11	-2.52186	0.0402954
10396	NM_001105529,NM_006095	ATP8A1	ATPase phospholipid transporting 8A1	5.80251	0.000954554	5226	NM_001304451,NM_001304452,NM_002631	PGD	phosphogluconate dehydrogenase	-2.51863	0.0375602
23002	NM_001270520,NM_014992	DAAM1	dishevelled associated activator of morphogenesis 1	5.78937	0.000344554	6844	NM_014232	VAMP2	vesicle associated membrane protein 2	-2.51758	0.0208687
6911	NM_004608	TBX6	T-box 6	5.78532	0.00739959	9798	NM_001270975,NM_001270976,NM_001270977,NM_001270978,NM_001270979,NM_014761	IST1	IST1, ESCRT-III associated factor	-2.5175	0.0273767
5795	NM_001098503,NM_002843	PTPRJ	protein tyrosine phosphatase, receptor type J	5.77832	0.00109042	440	NM_001178075,NM_001178076,NM_001178077,NM_001673,NM_133436,NM_183356	ASNS	asparagine synthetase (glutamine-hydrolyzing)	-2.51648	0.0354391
23308	NM_001283050,NM_001283051,NM_001283052,NM_015259	ICOSLG	inducible T-cell co-stimulator ligand	5.77824	0.00752006	4864	NM_000271	NPC1	NPC intracellular cholesterol transporter 1	-2.50925	0.0177913
57333	NM_020650	RCN3	reticulocalbin 3	5.77145	0.000458519	3831	NM_001130107,NM_005552,NM_182923	KLC1	kinesin light chain 1	-2.50631	0.030218
5933	NM_001323281,NM_001323282,NM_002895,NM_183404	RBL1	retinoblastoma-like 1	5.75975	0.00126515	124454	NM_001083614,NM_001308211,NR_003501	EARS2	glutamyl-tRNA synthetase 2, mitochondrial	-2.50605	0.036216
2512	NM_000146	FTL	ferritin, light polypeptide	5.75857	0.00013717	5870	NM_001243718,NM_001243719,NM_002869,NM_198896	RAB6A	RAB6A, member RAS oncogene family	-2.50352	0.0365555
3790	NM_001282428,NM_002252	KCNS3	potassium voltage-gated channel modifier subfamily S member 3	5.75375	0.00183873	51729	NM_016312	WBP11	WW domain binding protein 11	-2.50303	0.0267144
105372582	NR_135006	LOC105372582	uncharacterized LOC105372582	5.75143	0.00515264	117246	NM_017647	FTSJ3	FtsJ homolog 3	-2.50043	0.0185863
203102	NM_001313994,NM_145004	ADAM32	ADAM metallopeptidase domain 32	5.74908	0.00455213	55109	NM_018046	AGGF1	angiogenic factor with G-patch and FHA domains 1	-2.50043	0.0365448
54974	NM_001317824,NM_001317825,NM_001317826,NM_017872	THG1L	tRNA-histidine guanylyltransferase 1 like	5.74806	0.00254495	10180	NM_001167582,NM_005777	RBM6	RNA binding motif protein 6	-2.50002	0.0315647
100529215	NM_001172650,NM_001202425	ZNF559-ZNF177	ZNF559-ZNF177 readthrough	5.74596	0.0186234	25828	NM_012473	TXN2	thioredoxin 2	-2.49916	0.0301089
8926	NM_005678,NM_022804	SNURF	SNRPN upstream reading frame	5.7298	0.00334849	1362	NM_001199775,NM_001304	CPD	carboxypeptidase D	-2.49861	0.0388458
23460	NM_080284	ABCA6	ATP binding cassette subfamily A member 6	5.72854	0.00894625	81533	NM_001305002,NM_030790	ITFG1	integrin alpha FG-GAP repeat containing 1	-2.49833	0.0322888
166785	NM_172250	MMAA	methylmalonic aciduria (cobalamin deficiency) cblA type	5.72813	0.000891333	54902	NM_001271420,NM_017775	TTC19	tetratricopeptide repeat domain 19	-2.49703	0.0181731
27099	NR_027330	SND1-IT1	SND1 intronic transcript 1	5.72162	0.00258322	22911	NM_001142550,NM_001142551,NM_014969	WDR47	WD repeat domain 47	-2.49447	0.0343794
960	NM_000610,NM_001001389,NM_001001390,NM_001001391,NM_001001392,NM_001202555,NM_001202556,NM_001202557	CD44	CD44 molecule (Indian blood group)	5.71781	0.00595182	63935	NM_022104	PCIF1	PDX1 C-terminal inhibiting factor 1	-2.49443	0.0368179
9824	NM_001286479,NM_001286480,NM_014783,NM_199357	ARHGAP11A	Rho GTPase activating protein 11A	5.71465	0.00727708	11083	NM_001193369,NM_001193370,NM_022105,NM_033081,NM_080796,NM_080797	DIDO1	death inducer-obliterator 1	-2.49393	0.0267034
55784	NM_001159643,NM_001159644,NM_018349	MCTP2	multiple C2 domains, transmembrane 2	5.70763	0.0188331	7184	NM_003299	HSP90B1	heat shock protein 90kDa beta family member 1	-2.49185	0.0358734
93655	NR_002332	ST7-OT3	ST7 overlapping transcript 3	5.69991	0.0116611	51078	NM_001164356,NM_015963	THAP4	THAP domain containing 4	-2.49181	0.0432876
29089	NM_001310326,NM_014176	UBE2T	ubiquitin conjugating enzyme E2 T	5.6988	0.00219621	58478	NM_001292017,NM_021204,NR_120457	ENOPH1	enolase-phosphatase 1	-2.49176	0.0212531
11154	NM_001128126,NM_001254726,NM_001254727,NM_001254728,NM_001254729,NM_007077	AP4S1	adaptor related protein complex 4 sigma 1 subunit	5.69867	0.00302787	9372	NM_004799,NM_007324	ZFYVE9	zinc finger FYVE-type containing 9	-2.49122	0.0358993
119385	NM_133447	AGAP11	ArfGAP with GTPase domain, ankyrin repeat and PH domain 11	5.69327	0.00429775	51363	NM_001270764,NM_001270765,NM_014863,NM_015892	CHST15	carbohydrate (N-acetylgalactosamine 4-sulfate 6-O) sulfotransferase 15	-2.49045	0.0363307
284403	NM_001083961,NM_173636	WDR62	WD repeat domain 62	5.67547	0.00394538	2317	NM_001164317,NM_001164318,NM_001164319,NM_001457	FLNB	filamin B	-2.48983	0.0163005
6649	NM_003102	SOD3	superoxide dismutase 3, extracellular	5.66367	0.0487372	23386	NM_015332	NUDCD3	NudC domain containing 3	-2.48822	0.0217972
53358	NM_016848	SHC3	SHC (Src homology 2 domain containing) transforming protein 3	5.65908	0.00329701	84331	NM_138418	MCRIP2	MAPK regulated co-repressor interacting protein 2	-2.48604	0.0329301
1894	NM_001258315,NM_001258316,NM_018098	ECT2	epithelial cell transforming 2	5.65562	0.000728953	23541	NM_001204204,NM_001291932,NM_012429,NM_033382	SEC14L2	SEC14 like lipid binding 2	-2.48431	0.0251826
10622	NM_006467	POLR3G	polymerase (RNA) III subunit G	5.65458	0.0210773	6774	NM_003150,NM_139276,NM_213662	STAT3	signal transducer and activator of transcription 3	-2.484	0.0269366
105	NM_018702	ADARB2	adenosine deaminase, RNA specific B2 (inactive)	5.653	0.0205929	51720	NM_001199297,NM_001199298,NM_001317961,NM_016290	UIMC1	ubiquitin interaction motif containing 1	-2.4832	0.0464561
2100	NM_001040275,NM_001214902,NM_001271876,NM_001271877,NM_001291712,NM_001291723,NM_001437,NR_073496,NR_073497	ESR2	estrogen receptor 2	5.65257	0.0288422	55788	NM_018368	LMBRD1	LMBR1 domain containing 1	-2.48309	0.0177745
580	NM_000465,NM_001282543,NM_001282545,NM_001282548,NM_001282549,NR_104212,NR_104215,NR_104216	BARD1	BRCA1 associated RING domain 1	5.64457	0.000821413	80227	NM_001267803,NM_001267804,NM_001267805,NM_001267806,NM_025155	PAAF1	proteasomal ATPase associated factor 1	-2.48045	0.0168779
442454	NR_002308	UQCRBP1	ubiquinol-cytochrome c reductase binding protein pseudogene 1	5.63686	0.00294672	56271	NM_001080425,NM_001127688	BEX4	brain expressed X-linked 4	-2.48026	0.0174043
55819	NM_001280801,NM_018434	RNF130	ring finger protein 130	5.63529	0.000535809	10174	NM_001018003,NM_005775	SORBS3	sorbin and SH3 domain containing 3	-2.4796	0.0233264
64375	NM_022465	IKZF4	IKAROS family zinc finger 4	5.63288	0.015761	81622	NM_030930	UNC93B1	unc-93 homolog B1 (C. elegans)	-2.47928	0.0263446
100506834	NR_049794	GAS1RR	GAS1 adjacent regulatory RNA	5.62351	0.0103192	55154	NM_001256532,NM_001256533,NM_018116,NR_046292,NR_046293,NR_046294,NR_046295	MSTO1	misato 1, mitochondrial distribution and morphology regulator	-2.47878	0.047335
84074	NM_032134,NR_130649	QRICH2	glutamine rich 2	5.62316	0.0068699	10992	NM_006842	SF3B2	splicing factor 3b subunit 2	-2.47863	0.0218093
8516	NM_001291494,NM_003638	ITGA8	integrin subunit alpha 8	5.61295	0.0174431	9688	NM_001242795,NM_001242796,NM_014669	NUP93	nucleoporin 93kDa	-2.47748	0.0342063
100642175	NR_131221	SPRY4-IT1	SPRY4 intronic transcript 1	5.61275	0.0107418	27183	NM_013245	VPS4A	vacuolar protein sorting 4 homolog A	-2.47584	0.021105
10154	NM_005761,NR_037687	PLXNC1	plexin C1	5.60651	0.00691774	10651	NM_001006635,NM_001319097,NM_001319098,NM_006554	MTX2	metaxin 2	-2.47406	0.0412981
80790	NM_030629,NM_198390	CMIP	c-Maf inducing protein	5.60647	0.00457612	2547	NM_001288976,NM_001288977,NM_001288978,NM_001469	XRCC6	X-ray repair complementing defective repair in Chinese hamster cells 6	-2.47401	0.0491832
6541	NM_003045	SLC7A1	solute carrier family 7 member 1	5.60329	0.00363267	1028	NM_000076,NM_001122630,NM_001122631	CDKN1C	cyclin-dependent kinase inhibitor 1C	-2.47239	0.0356652
340719	NM_199461	NANOS1	nanos homolog 1 (Drosophila)	5.5999	0.022373	6385	NM_002999	SDC4	syndecan 4	-2.47043	0.025313
101928673	NR_125960	LOC101928673	uncharacterized LOC101928673	5.5959	0.00770658	7520	NM_021141	XRCC5	X-ray repair complementing defective repair in Chinese hamster cells 5	-2.46895	0.0224142
100652865	NR_103840,NR_103841	LINC00539	long intergenic non-protein coding RNA 539	5.59259	0.00656127	80210	NM_001271466,NM_001291656,NM_025139	ARMC9	armadillo repeat containing 9	-2.46866	0.0256021
2187	NM_001018113,NM_001324162,NM_152633,NR_136707	FANCB	Fanconi anemia complementation group B	5.59114	0.00387777	10670	NM_006570	RRAGA	Ras related GTP binding A	-2.467	0.0247648
101927257	NR_109965	LOC101927257	uncharacterized LOC101927257	5.59015	0.00778806	6925	NM_001083962,NM_001243226,NM_001243227,NM_001243228,NM_001243230,NM_001243231,NM_001243232,NM_001243233,NM_001243234,NM_001243235,NM_001243236,NM_001306207,NM_001306208,NM_003199	TCF4	transcription factor 4	-2.46681	0.0294458
56935	NM_020179	SMCO4	single-pass membrane protein with coiled-coil domains 4	5.5883	0.0327559	8754	NM_003816,NR_027638,NR_027639,NR_027878	ADAM9	ADAM metallopeptidase domain 9	-2.46494	0.0326597
254013	NM_001135863,NM_001135864,NM_173802	ETFBKMT	electron transfer flavoprotein beta subunit lysine methyltransferase	5.58805	0.0075219	9898	NM_001127320,NM_001287815,NM_001287816,NM_014847	UBAP2L	ubiquitin associated protein 2 like	-2.46406	0.0246788
100505576	NR_038847	LINC00672	long intergenic non-protein coding RNA 672	5.58342	0.00279122	9667	NM_014649	SAFB2	scaffold attachment factor B2	-2.45946	0.0415472
8643	NM_001166292,NM_003738	PTCH2	patched 2	5.57667	0.00137765	55147	NM_001077351,NM_001077352,NM_001308044,NM_018107	RBM23	RNA binding motif protein 23	-2.45775	0.0283241
10293	NM_005879	TRAIP	TRAF interacting protein	5.57044	0.00823748	1314	NM_001098398,NM_004371	COPA	coatomer protein complex subunit alpha	-2.45672	0.0443971
10568	NM_001177998,NM_001177999,NM_006424	SLC34A2	solute carrier family 34 member 2	5.56435	0.00276386	3157	NM_001098272,NM_001324219,NM_001324220,NM_001324222,NM_001324223,NM_001324224,NM_002130	HMGCS1	3-hydroxy-3-methylglutaryl-CoA synthase 1	-2.45634	0.0305842
163589	NM_001199085,NM_001199089,NM_001199091,NM_001199092,NM_173533	TDRD5	tudor domain containing 5	5.55943	0.0114799	88455	NM_033121	ANKRD13A	ankyrin repeat domain 13A	-2.45627	0.0284683
257144	NM_001190259,NM_001190260,NM_152785	GCSAM	germinal center associated signaling and motility	5.55429	0.026464	51202	NM_016355,NM_201224	DDX47	DEAD-box helicase 47	-2.4556	0.0453341
166929	NM_001136257,NM_001136258,NM_152621	SGMS2	sphingomyelin synthase 2	5.53598	0.0023984	149603	NM_001010858	RNF187	ring finger protein 187	-2.45412	0.0230981
103352539	NR_121647	LINC01410	long intergenic non-protein coding RNA 1410	5.53316	0.0115507	51706	NM_016243	CYB5R1	cytochrome b5 reductase 1	-2.45395	0.0254271
256586	NM_001143917,NM_153374	LYSMD2	LysM domain containing 2	5.53199	0.0137724	10629	NM_006473	TAF6L	TATA-box binding protein associated factor 6 like	-2.45362	0.0459635
101669766	NR_103847	ZNF350-AS1	ZNF350 antisense RNA 1	5.53154	0.00882593	9578	NM_006035	CDC42BPB	CDC42 binding protein kinase beta	-2.44772	0.0267804
199699	NM_152654	DAND5	DAN domain BMP antagonist family member 5	5.53135	0.00341918	8816	NM_001284206,NM_001284207,NM_001284208,NM_003861	DCAF5	DDB1 and CUL4 associated factor 5	-2.44229	0.0417318
6659	NM_003107	SOX4	SRY-box 4	5.53005	0.00250636	8658	NM_003747	TNKS	tankyrase	-2.44093	0.0344501
55076	NM_018004	TMEM45A	transmembrane protein 45A	5.52605	0.000676801	7283	NM_001070	TUBG1	tubulin gamma 1	-2.44067	0.0469868
1830	NM_001944	DSG3	desmoglein 3	5.51831	0.00234991	8733	NM_003801	GPAA1	glycosylphosphatidylinositol anchor attachment 1	-2.43715	0.0309888
57677	NM_001297619,NM_020917	ZFP14	ZFP14 zinc finger protein	5.51781	0.00525409	1612	NM_001288729,NM_001288730,NM_001288731,NM_004938	DAPK1	death associated protein kinase 1	-2.43289	0.0259909
284697	NM_183242	BTBD8	BTB domain containing 8	5.51663	0.00220048	7414	NM_003373,NM_014000	VCL	vinculin	-2.43171	0.0229962
644903	NR_135290	GCC2-AS1	GCC2 antisense RNA 1	5.51523	0.0164761	84271	NM_001278657,NM_032311,NM_178136,NR_103820	POLDIP3	polymerase (DNA) delta interacting protein 3	-2.43086	0.02691
441242	NR_038378,NR_103527	LOC441242	uncharacterized LOC441242	5.5078	0.00181525	10139	NM_001134758,NM_001267544,NM_001267545,NM_001267546,NM_001267547,NM_001267548,NM_001267549,NM_003224,NR_051954,NR_051955,NR_051956,NR_051957,NR_051958	ARFRP1	ADP ribosylation factor related protein 1	-2.43052	0.0252605
5169	NM_005021,NR_133007	ENPP3	ectonucleotide pyrophosphatase/phosphodiesterase 3	5.50267	0.00937312	84928	NM_001301163,NM_032842	TMEM209	transmembrane protein 209	-2.43036	0.024375
100131733	NR_038996	USP30-AS1	USP30 antisense RNA 1	5.49669	0.00204725	56850	NM_020137	GRIPAP1	GRIP1 associated protein 1	-2.42339	0.036553
2009	NM_001008707,NM_004434	EML1	echinoderm microtubule associated protein like 1	5.49225	0.0043472	51115	NM_001286707,NM_001286719,NM_001317807,NM_016033	RMDN1	regulator of microtubule dynamics 1	-2.42057	0.0358159
8404	NM_001128310,NM_001291976,NM_001291977,NM_004684	SPARCL1	SPARC like 1	5.48962	0.029028	9747	NM_001206938,NM_001206941,NM_014719	TCAF1	TRPM8 channel associated factor 1	-2.41566	0.0384899
26115	NM_025185	TANC2	tetratricopeptide repeat, ankyrin repeat and coiled-coil containing 2	5.48562	0.00238972	57827	NM_021184	C6orf47	chromosome 6 open reading frame 47	-2.41405	0.0382937
493860	NM_001008391	CCDC73	coiled-coil domain containing 73	5.48245	0.00919951	6892	NM_003190,NM_172208,NM_172209	TAPBP	TAP binding protein (tapasin)	-2.41056	0.0454053
377677	NM_198584	CA13	carbonic anhydrase 13	5.46985	0.00122402	84263	NM_001195822,NM_032303,NR_036651	HSDL2	hydroxysteroid dehydrogenase like 2	-2.40887	0.0450408
253558	NM_001002257,NM_001304445,NM_001304446,NM_182551	LCLAT1	lysocardiolipin acyltransferase 1	5.46016	0.000234449	6426	NM_001078166,NM_006924,NR_034041	SRSF1	serine/arginine-rich splicing factor 1	-2.40817	0.0309841
101926917	NR_136286	ANKRD18CP	ankyrin repeat domain 18C, pseudogene	5.45969	0.0031808	54461	NM_018998	FBXW5	F-box and WD repeat domain containing 5	-2.40732	0.0311944
128178	NM_080738,NM_145861	EDARADD	EDAR-associated death domain	5.45854	0.0157118	92579	NM_001319945,NM_138387,NR_028581,NR_028582	G6PC3	glucose 6 phosphatase catalytic subunit 3	-2.40679	0.0209284
63923	NM_022093	TNN	tenascin N	5.45775	0.0181405	1514	NM_001257971,NM_001257972,NM_001257973,NM_001912,NM_145918	CTSL	cathepsin L	-2.4065	0.038542
284649	NR_040063	SMG7-AS1	SMG7 antisense RNA 1	5.45743	0.00980795	3187	NM_001257293,NM_005520	HNRNPH1	heterogeneous nuclear ribonucleoprotein H1 (H)	-2.39994	0.0211827
23576	NM_001134445,NM_012137	DDAH1	dimethylarginine dimethylaminohydrolase 1	5.45035	0.00267513	8777	NM_001261406,NM_001261407,NM_003829	MPDZ	multiple PDZ domain crumbs cell polarity complex component	-2.39865	0.0212471
283349	NM_178169,NR_040718	RASSF3	Ras association domain family member 3	5.44956	0.00264496	60558	NM_021927	GUF1	GUF1 homolog, GTPase	-2.3978	0.0484503
121457	NM_153687,NM_201612,NM_201613	IKBIP	IKBKB interacting protein	5.44844	0.000283237	4722	NM_004551	NDUFS3	NADH:ubiquinone oxidoreductase core subunit S3	-2.39744	0.0280776
5734	NM_000958	PTGER4	prostaglandin E receptor 4	5.43615	0.0236801	56889	NM_020123	TM9SF3	transmembrane 9 superfamily member 3	-2.3964	0.0272984
100506674	NR_109862,NR_109863,NR_109864,NR_109865	BRCAT54	breast cancer-associated transcript 54	5.43401	0.0254118	6749	NM_003146	SSRP1	structure specific recognition protein 1	-2.39379	0.0395262
55301	NM_001039702,NM_018324	OLAH	oleoyl-ACP hydrolase	5.43222	0.00720337	7203	NM_001008800,NM_005998,NR_036564,NR_036565	CCT3	chaperonin containing TCP1 subunit 3	-2.39372	0.0427954
200205	NM_001010867,NM_001310327	IBA57	IBA57 homolog, iron-sulfur cluster assembly	5.43057	0.0133721	93058	NM_001099337,NM_144576	COQ10A	coenzyme Q10A	-2.39319	0.0312268
83544	NM_001201366,NM_031427	DNAL1	dynein axonemal light chain 1	5.43006	0.00377433	9267	NM_001292018,NM_001292019,NM_004762,NM_017456	CYTH1	cytohesin 1	-2.39109	0.0455651
101060553	NR_120398	LOC101060553	uncharacterized LOC101060553	5.42862	0.0275888	378805	NR_015431,NR_024153,NR_034120,NR_109850,NR_109851,NR_109852,NR_109853,NR_109854,NR_109855,NR_110472,NR_110473	LINC-PINT	long intergenic non-protein coding RNA, p53 induced transcript	-2.38678	0.0302399
56155	NM_001201457,NM_031272,NM_198393	TEX14	testis expressed 14	5.42654	0.00300147	2720	NM_000404,NM_001079811,NM_001135602,NM_001317040	GLB1	galactosidase beta 1	-2.38614	0.0424706
101929215	NR_109930	CTD-2201I18.1	uncharacterized LOC101929215	5.41998	0.00619971	11070	NM_007024	TMEM115	transmembrane protein 115	-2.38513	0.0291087
81704	NM_001190458,NM_001193536,NM_203447	DOCK8	dedicator of cytokinesis 8	5.41775	0.00393841	5332	NM_000933,NM_001172646,NM_182797	PLCB4	phospholipase C beta 4	-2.38402	0.0420337
159195	NM_001320437,NM_001320441,NM_152586,NR_135249,NR_135250	USP54	ubiquitin specific peptidase 54	5.41671	0.000593462	10970	NM_006825	CKAP4	cytoskeleton-associated protein 4	-2.38376	0.0390155
66008	NM_015049	TRAK2	trafficking protein, kinesin binding 2	5.41399	8.50523e-05	10059	NM_001278463,NM_001278464,NM_001278465,NM_001278466,NM_005690,NM_012062,NM_012063	DNM1L	dynamin 1-like	-2.38355	0.02626
79158	NM_024312	GNPTAB	N-acetylglucosamine-1-phosphate transferase alpha and beta subunits	5.41163	0.000699013	80762	NM_030571	NDFIP1	Nedd4 family interacting protein 1	-2.38075	0.0239215
116028	NM_152308,NR_130754	RMI2	RecQ mediated genome instability 2	5.41112	0.00641203	5747	NM_001199649,NM_001316342,NM_005607,NM_153831	PTK2	protein tyrosine kinase 2	-2.38052	0.0239772
1638	NM_001129889,NM_001322182,NM_001322183,NM_001322184,NM_001322185,NM_001322186,NM_001922	DCT	dopachrome tautomerase	5.39137	0.0133074	8309	NM_003500	ACOX2	acyl-CoA oxidase 2, branched chain	-2.3724	0.0389118
56144	NM_018907,NM_031500	PCDHA4	protocadherin alpha 4	5.38403	0.0189675	10419	NM_001039619,NM_001282953,NM_001282954,NM_001282955,NM_001282956,NM_006109	PRMT5	protein arginine methyltransferase 5	-2.36954	0.0279136
22809	NM_001193646,NM_001290746,NM_012068	ATF5	activating transcription factor 5	5.3804	0.0331229	92335	NM_001003786,NM_001003787,NM_001003788,NM_001165969,NM_001165970,NM_153335	STRADA	STE20-related kinase adaptor alpha	-2.36439	0.0492436
642946	NR_027285,NR_027286	FLVCR1-AS1	FLVCR1 antisense RNA 1 (head to head)	5.37769	0.0101913	1263	NM_004073	PLK3	polo like kinase 3	-2.36199	0.0433398
55089	NM_001143824,NM_018018	SLC38A4	solute carrier family 38 member 4	5.37472	0.0226282	23258	NM_001243254,NM_015213	DENND5A	DENN domain containing 5A	-2.36125	0.0227725
542767	NM_001014442,NM_001135816	C1QTNF9B-AS1	C1QTNF9B antisense RNA 1	5.37153	0.032258	8775	NM_003827,NR_038456,NR_038457	NAPA	NSF attachment protein alpha	-2.36111	0.0301319
285965	NR_033897	EPHA1-AS1	EPHA1 antisense RNA 1	5.36562	0.00302502	79770	NM_024715	TXNDC15	thioredoxin domain containing 15	-2.35992	0.0369443
23145	NM_198455	SSPO	SCO-spondin	5.36467	0.0148327	1836	NM_000112	SLC26A2	solute carrier family 26 member 2	-2.35477	0.0400577
57486	NM_020726	NLN	neurolysin	5.36335	0.00318872	374291	NM_024407	NDUFS7	NADH:ubiquinone oxidoreductase core subunit S7	-2.35267	0.0352999
401145	NM_001145065,NM_207491	CCSER1	coiled-coil serine rich protein 1	5.35994	0.016051	1267	NM_033133	CNP	2',3'-cyclic nucleotide 3' phosphodiesterase	-2.34547	0.0361986
64857	NM_022835	PLEKHG2	pleckstrin homology and RhoGEF domain containing G2	5.35884	0.00756933	57020	NM_001300743,NM_020314	C16orf62	chromosome 16 open reading frame 62	-2.34316	0.0322769
56944	NM_001286352,NM_001286353,NM_020190	OLFML3	olfactomedin like 3	5.35545	0.0184716	29090	NM_014177	TIMM21	translocase of inner mitochondrial membrane 21	-2.3431	0.0373616
641451	NR_002917	SNORA19	small nucleolar RNA, H/ACA box 19	5.35406	0.0270827	253725	NM_001169106,NM_001169107,NM_015262	FAM21C	family with sequence similarity 21 member C	-2.33871	0.0429766
100506540	NR_038360	SPTY2D1-AS1	SPTY2D1 antisense RNA 1	5.3492	0.00867205	7905	NM_005669	REEP5	receptor accessory protein 5	-2.33396	0.0325038
2175	NM_000135,NM_001018112,NM_001286167	FANCA	Fanconi anemia complementation group A	5.34869	0.00638034	10205	NM_005797,NM_144765	MPZL2	myelin protein zero like 2	-2.33354	0.0448049
114796	NR_021487,NR_027328,NR_027329	PSMG3-AS1	PSMG3 antisense RNA 1 (head to head)	5.34577	0.00191232	5885	NM_006265	RAD21	RAD21 cohesin complex component	-2.33297	0.029865
100506457	NR_110196,NR_110197,NR_110198	MIR3681HG	MIR3681 host gene	5.34398	0.00853538	2550	NM_001319053,NM_001470,NM_021903,NM_021904	GABBR1	gamma-aminobutyric acid type B receptor subunit 1	-2.32957	0.046839
54768	NM_001198542,NM_001198543,NM_001270974,NM_017558	HYDIN	HYDIN, axonemal central pair apparatus protein	5.34235	0.00380452	292	NM_001152	SLC25A5	solute carrier family 25 member 5	-2.32598	0.0399978
440952	NR_033965	EIF1B-AS1	EIF1B antisense RNA 1	5.33949	0.00373264	26123	NM_001143973,NM_015631	TCTN3	tectonic family member 3	-2.32536	0.0287324
165082	NM_001145168,NM_001145169,NM_001321971,NM_001321975,NM_153835,NR_135916	ADGRF3	adhesion G protein-coupled receptor F3	5.33852	0.00478977	22936	NM_012081	ELL2	elongation factor for RNA polymerase II 2	-2.32458	0.0279244
283267	NR_015451	LINC00294	long intergenic non-protein coding RNA 294	5.33029	0.0073384	23509	NM_015352,NM_172236	POFUT1	protein O-fucosyltransferase 1	-2.32044	0.0341716
390595	NM_001163692	UBAP1L	ubiquitin associated protein 1 like	5.32516	0.0037872	23481	NM_001243225,NM_001282327,NM_001282328,NM_014303	PES1	pescadillo ribosomal biogenesis factor 1	-2.31738	0.0254152
4168	NM_001099855,NM_001171876,NM_001171877,NM_001171878,NM_001171879,NM_005369	MCF2	MCF.2 cell line derived transforming sequence	5.32304	0.00514233	2937	NM_000178,NM_001322494,NM_001322495	GSS	glutathione synthetase	-2.31733	0.0339924
157247	NR_046216	MGC27345	uncharacterized protein MGC27345	5.31993	0.00209303	2239	NM_001448	GPC4	glypican 4	-2.31212	0.034862
728411	NR_027026,NR_027027,NR_027028	GUSBP1	glucuronidase, beta pseudogene 1	5.3059	0.00231746	5591	NM_001081640,NM_006904	PRKDC	protein kinase, DNA-activated, catalytic polypeptide	-2.30851	0.0394739
57002	NM_001282446,NM_020192	YAE1D1	Yae1 domain containing 1	5.30344	0.00158429	3068	NM_001126050,NM_001126051,NM_001319186,NM_001319187,NM_001319188,NM_004494,NR_135008	HDGF	hepatoma-derived growth factor	-2.30813	0.0336633
100132101	NR_036470	HERC2P7	hect domain and RLD 2 pseudogene 7	5.29887	0.0051031	2762	NM_001253846,NM_001500	GMDS	GDP-mannose 4,6-dehydratase	-2.30723	0.0406184
283284	NM_173588	IGSF22	immunoglobulin superfamily member 22	5.29645	0.00268228	2222	NM_001287742,NM_001287743,NM_001287744,NM_001287745,NM_001287747,NM_001287748,NM_001287749,NM_001287750,NM_001287751,NM_001287756,NM_004462	FDFT1	farnesyl-diphosphate farnesyltransferase 1	-2.30696	0.0352127
11278	NM_007249	KLF12	Kruppel-like factor 12	5.2961	0.00345133	50626	NM_001129888,NM_032687,NM_138496	CYHR1	cysteine/histidine-rich 1	-2.30674	0.0342029
202333	NM_153610	CMYA5	cardiomyopathy associated 5	5.29361	0.0143863	509	NM_001001973,NM_001320886,NM_005174	ATP5C1	ATP synthase, H+ transporting, mitochondrial F1 complex, gamma polypeptide 1	-2.30294	0.0360293
118490	NM_001024593	MSS51	MSS51 mitochondrial translational activator	5.28887	0.00631961	54623	NM_001256826,NM_019088,NR_046384	PAF1	PAF1 homolog, Paf1/RNA polymerase II complex component	-2.30274	0.0262059
79713	NM_024660	IGFLR1	IGF like family receptor 1	5.28843	0.0241022	6182	NM_002949	MRPL12	mitochondrial ribosomal protein L12	-2.29755	0.0496575
220136	NM_145020	CFAP53	cilia and flagella associated protein 53	5.28812	0.00916223	7257	NM_005999	TSNAX	translin-associated factor X	-2.29606	0.034472
953	NM_001098175,NM_001164178,NM_001164179,NM_001164181,NM_001164182,NM_001164183,NM_001312654,NM_001320916,NM_001776	ENTPD1	ectonucleoside triphosphate diphosphohydrolase 1	5.27978	0.000657994	57448	NM_016252	BIRC6	baculoviral IAP repeat containing 6	-2.29577	0.0330834
102723704	NR_125932	LOC102723704	uncharacterized LOC102723704	5.27411	0.0177577	51629	NM_001143780,NM_001321240,NM_001321241,NM_016016	SLC25A39	solute carrier family 25 member 39	-2.29251	0.0439104
114780	NM_001076780,NM_001278423,NM_001278425,NM_052892,NR_126532	PKD1L2	polycystin 1 like 2 (gene/pseudogene)	5.26976	0.0108105	100861548	NR_046507	PINK1-AS	PINK1 antisense RNA	-2.29159	0.0343274
107133515	NR_015341	LOC107133515	SMURF2P1-LRRC37BP1 readthrough transcribed pseudogene	5.26919	0.000239508	6477	NM_001006610,NM_003031	SIAH1	siah E3 ubiquitin protein ligase 1	-2.28969	0.0396694
85495	NR_002312	RPPH1	ribonuclease P RNA component H1	5.26909	0.004468	57494	NM_001297776,NM_020734,NR_123740	RIMKLB	ribosomal modification protein rimK-like family member B	-2.28663	0.0378565
100129842	NM_001159293	ZNF737	zinc finger protein 737	5.26621	0.0123321	84196	NM_001032730,NM_032236	USP48	ubiquitin specific peptidase 48	-2.28607	0.0421082
339327	NM_001297763,NM_178544	ZNF546	zinc finger protein 546	5.26265	0.00250897	80315	NM_001308189,NM_001308191,NM_001308192,NM_001308193,NM_030627	CPEB4	cytoplasmic polyadenylation element binding protein 4	-2.28579	0.0356152
192666	NM_019016	KRT24	keratin 24	5.2576	0.0367719	23595	NM_001197259,NM_012381,NM_181837	ORC3	origin recognition complex subunit 3	-2.28328	0.047666
5463	NM_002702,NR_026893	POU6F1	POU class 6 homeobox 1	5.25526	0.0124372	3397	NM_002165,NM_181353	ID1	inhibitor of DNA binding 1, HLH protein	-2.2804	0.0463571
64859	NM_001031716,NM_001254736,NR_045622,NR_045623	NABP1	nucleic acid binding protein 1	5.24579	0.00116587	1801	NM_001383	DPH1	diphthamide biosynthesis 1	-2.2755	0.0294566
66002	NM_023944,NR_117085	CYP4F12	cytochrome P450 family 4 subfamily F member 12	5.24547	0.0129202	55705	NM_018085	IPO9	importin 9	-2.27435	0.0358025
6855	NM_003179	SYP	synaptophysin	5.23807	0.0121035	3030	NM_000182	HADHA	hydroxyacyl-CoA dehydrogenase/3-ketoacyl-CoA thiolase/enoyl-CoA hydratase (trifunctional protein), alpha subunit	-2.2741	0.036263
4815	NM_001294345,NM_001294346,NM_016533	NINJ2	ninjurin 2	5.22973	0.00160043	5425	NM_001127218,NM_001256879,NM_006230	POLD2	polymerase (DNA) delta 2, accessory subunit	-2.26919	0.0412638
2982	NM_000856,NM_001130682,NM_001130683,NM_001130684,NM_001130685,NM_001130687,NM_001256449	GUCY1A3	guanylate cyclase 1, soluble, alpha 3	5.22637	0.0444812	513	NM_001001975,NM_001687	ATP5D	ATP synthase, H+ transporting, mitochondrial F1 complex, delta subunit	-2.26754	0.0460156
284443	NM_001076678,NM_145326,NM_175910	ZNF493	zinc finger protein 493	5.22239	0.00783226	54014	NM_001007246,NM_018963,NM_033656	BRWD1	bromodomain and WD repeat domain containing 1	-2.26743	0.0471205
54566	NM_018424,NM_019114	EPB41L4B	erythrocyte membrane protein band 4.1 like 4B	5.21841	0.0196333	5504	NM_001291504,NM_001291505,NM_001316325,NM_006241,NR_133014	PPP1R2	protein phosphatase 1 regulatory inhibitor subunit 2	-2.26435	0.0315488
3134	NM_001098478,NM_001098479,NM_018950	HLA-F	major histocompatibility complex, class I, F	5.21492	0.0325142	9948	NM_005112,NM_017491	WDR1	WD repeat domain 1	-2.25983	0.0397047
79092	NM_001257970,NM_024110,NM_052819,NR_047566	CARD14	caspase recruitment domain family member 14	5.21458	0.00446838	53635	NM_001305105,NM_001305108,NM_017432,NR_130963	PTOV1	prostate tumor overexpressed 1	-2.25793	0.038486
199870	NM_001143912,NM_001143913,NM_001143914,NM_001143915,NM_152660	FAM76A	family with sequence similarity 76 member A	5.21262	0.00288334	51663	NM_016107	ZFR	zinc finger RNA binding protein	-2.25689	0.0489302
7171	NM_001145160,NM_003290	TPM4	tropomyosin 4	5.21025	0.000839616	375056	NM_001300867,NM_001324062,NM_001324063,NM_001324064,NM_001324065,NM_198551	MIA3	melanoma inhibitory activity family member 3	-2.25161	0.0482276
84696	NM_032604	ABHD1	abhydrolase domain containing 1	5.20921	0.00438527	5602	NM_001318067,NM_001318068,NM_001318069,NM_002753,NM_138980,NM_138982	MAPK10	mitogen-activated protein kinase 10	-2.24804	0.0382898
57597	NM_001291324	BAHCC1	BAH domain and coiled-coil containing 1	5.20912	0.00443257	23387	NM_001281748,NM_001281749,NM_025164	SIK3	SIK family kinase 3	-2.24686	0.0475022
150568	NR_015399	LINC01102	long intergenic non-protein coding RNA 1102	5.20151	0.00213608	4074	NM_001207024,NM_002355	M6PR	mannose-6-phosphate receptor, cation dependent	-2.24241	0.0380988
3770	NM_013348	KCNJ14	potassium voltage-gated channel subfamily J member 14	5.20005	0.0263111	27086	NM_001012505,NM_001244808,NM_001244810,NM_001244812,NM_001244813,NM_001244814,NM_001244815,NM_001244816,NM_032682	FOXP1	forkhead box P1	-2.23893	0.0444373
23341	NM_001287811,NM_015291,NR_109898	DNAJC16	DnaJ heat shock protein family (Hsp40) member C16	5.18881	0.000799583	54934	NM_017822	KANSL2	KAT8 regulatory NSL complex subunit 2	-2.23787	0.0443766
19	NM_005502	ABCA1	ATP binding cassette subfamily A member 1	5.18714	0.00126679	10425	NM_001317333,NM_001317334,NM_006321	ARIH2	ariadne RBR E3 ubiquitin protein ligase 2	-2.23367	0.047686
9636	NM_005101	ISG15	ISG15 ubiquitin-like modifier	5.16609	0.013781	6184	NM_002950	RPN1	ribophorin I	-2.23099	0.0397137
9620	NM_014246	CELSR1	cadherin EGF LAG seven-pass G-type receptor 1	5.16536	0.00710871	8729	NM_001199378,NM_001199379,NM_004193	GBF1	golgi brefeldin A resistant guanine nucleotide exchange factor 1	-2.22837	0.0382954
376693	NR_026667	RPS10P7	ribosomal protein S10 pseudogene 7	5.15778	0.0155707	293	NM_001636,NM_001636_dup1	SLC25A6	solute carrier family 25 member 6	-2.22686	0.0473524
301	NM_000700	ANXA1	annexin A1	5.15568	0.00948494	51586	NM_001003891,NM_001293234,NM_001293235,NM_001293236,NM_001293237,NM_015889	MED15	mediator complex subunit 15	-2.22484	0.0484983
5997	NM_002923	RGS2	regulator of G-protein signaling 2	5.15502	0.00231305	2631	NM_001202469,NM_001483	GBAS	glioblastoma amplified sequence	-2.22392	0.0492717
54739	NM_017523,NM_199139,NR_046396,NR_046397,NR_046398	XAF1	XIAP associated factor 1	5.15154	0.00290124	55187	NM_015378,NM_018156	VPS13D	vacuolar protein sorting 13 homolog D	-2.2234	0.0499556
81602	NM_001193478,NM_030911,NR_036439	CDADC1	cytidine and dCMP deaminase domain containing 1	5.15089	0.0026311	6526	NM_006933	SLC5A3	solute carrier family 5 member 3	-2.22262	0.0487084
93	NM_001106	ACVR2B	activin A receptor type 2B	5.14306	0.00251651	81037	NM_030782	CLPTM1L	CLPTM1-like	-2.21922	0.0367649
150786	NM_001077637	WTH3DI	RAB6C-like	5.14118	0.00177973	23140	NM_015113	ZZEF1	zinc finger ZZ-type and EF-hand domain containing 1	-2.21862	0.0473241
158158	NM_152573	RASEF	RAS and EF-hand domain containing	5.12613	0.0190312	8703	NM_001199873,NM_001199874,NM_003779	B4GALT3	beta-1,4-galactosyltransferase 3	-2.21514	0.0482522
115207	NM_138444	KCTD12	potassium channel tetramerization domain containing 12	5.12479	0.000809199	92610	NM_052864	TIFA	TRAF interacting protein with forkhead associated domain	-2.21512	0.0443779
113802	NM_001102592,NM_144584	HENMT1	HEN1 methyltransferase homolog 1	5.12432	0.00502799	22980	NM_014972	TCF25	transcription factor 25	-2.2144	0.0402198
63939	NM_001190826,NM_001190827,NM_022106	FAM217B	family with sequence similarity 217 member B	5.12361	0.00242113	51133	NM_001319294,NM_001319295,NM_016121	KCTD3	potassium channel tetramerization domain containing 3	-2.21401	0.0450075
255324	NM_001270989,NM_001270990,NM_001270991,NM_001270992,NM_001270993,NR_073114,NR_073117	EPGN	epithelial mitogen	5.10931	0.00841498	740	NM_004927,NR_037567,NR_037568	MRPL49	mitochondrial ribosomal protein L49	-2.21036	0.0480184
83593	NM_182663,NM_182664,NM_182665	RASSF5	Ras association domain family member 5	5.10726	0.0112038	5621	NM_000311,NM_001080121,NM_001080122,NM_001080123,NM_001271561,NM_183079	PRNP	prion protein	-2.20018	0.044686
285600	NM_001145678,NM_173665	KIAA0825	KIAA0825	5.10445	0.00712742	3069	NM_001243900,NM_001320965,NM_001320966,NM_001320967,NM_005336,NM_203346	HDLBP	high density lipoprotein binding protein	-2.19498	0.0489671
26870	NR_004427	RNU1-2	RNA, U1 small nuclear 2	5.09528	0.0198874	9652	NM_014639	TTC37	tetratricopeptide repeat domain 37	-2.19234	0.0414781
221476	NM_001199159,NM_153370	PI16	peptidase inhibitor 16	5.09508	0.0359902	102	NM_001110,NM_001320570	ADAM10	ADAM metallopeptidase domain 10	-2.19014	0.0481752
9638	NM_005103,NM_022549	FEZ1	fasciculation and elongation protein zeta 1	5.0944	0.00298866	8664	NM_003753	EIF3D	eukaryotic translation initiation factor 3 subunit D	-2.18769	0.0469615
151246	NM_001160033,NM_001160046,NM_152524	SGO2	shugoshin 2	5.09202	0.00482522	23640	NM_001130106,NM_001297600,NM_012267	HSPBP1	HSPA (heat shock 70kDa) binding protein, cytoplasmic cochaperone 1	-2.17409	0.0450489
595135	NR_002836	PGM5P2	phosphoglucomutase 5 pseudogene 2	5.0807	0.00535903	90231	NM_138346	KIAA2013	KIAA2013	-2.17072	0.0419045
63977	NM_001040424,NM_001282934,NM_022115,NR_104257,NR_104258,NR_104260,NR_135464	PRDM15	PR domain 15	5.07901	0.00318652	27034	NM_014384	ACAD8	acyl-CoA dehydrogenase family member 8	-2.16831	0.0426773
102238594	NR_108100	SPACA6P-AS	SPACA6P antisense RNA	5.07172	0.0182934	162989	NM_001270614,NM_001270615,NM_133328,NR_073046,NR_073047,NR_073048,NR_073049,NR_073050,NR_073051,NR_073052	DEDD2	death effector domain containing 2	-2.16818	0.0426354
338811	NM_178539	FAM19A2	family with sequence similarity 19 (chemokine (C-C motif)-like), member A2	5.05766	0.0260674	11100	NM_001301016,NM_001321208,NM_001321211,NM_007040,NM_144732	HNRNPUL1	heterogeneous nuclear ribonucleoprotein U like 1	-2.16583	0.0403198
129049	NM_001039948,NM_001098497,NM_001098498,NM_133454	SGSM1	small G protein signaling modulator 1	5.04576	0.00277278	27336	NM_001163280,NM_014500	HTATSF1	HIV-1 Tat specific factor 1	-2.16548	0.039635
4851	NM_017617	NOTCH1	notch 1	5.04536	0.0102204	200576	NM_001178000,NM_015040,NM_152671	PIKFYVE	phosphoinositide kinase, FYVE-type zinc finger containing	-2.16482	0.0442812
56980	NM_020228,NM_199437,NM_199438,NM_199439	PRDM10	PR domain 10	5.04384	0.00622174	8801	NM_001177599,NM_003848	SUCLG2	succinate-CoA ligase GDP-forming beta subunit	-2.16097	0.0475862
51268	NM_016518	PIPOX	pipecolic acid and sarcosine oxidase	5.04267	0.0224301	57019	NM_001308347,NM_001308358,NM_020313	CIAPIN1	cytokine induced apoptosis inhibitor 1	-2.15889	0.0402778
58529	NM_021245	MYOZ1	myozenin 1	5.04266	0.0140332	6834	NM_001280787,NM_003172	SURF1	surfeit 1	-2.15611	0.0469656
100506599	NR_038969	PPP1R26-AS1	PPP1R26 antisense RNA 1	5.04245	0.00369336	6764	NM_005418,NM_139157,NM_213618	ST5	suppression of tumorigenicity 5	-2.1502	0.0499952
118429	NM_001145794,NM_001286780,NM_001286781,NM_058172	ANTXR2	anthrax toxin receptor 2	5.03935	0.00110135	23063	NM_001318328,NM_015045	WAPL	WAPL cohesin release factor	-2.13856	0.0408791
643387	NR_026923	LOC643387	TAR DNA binding protein pseudogene	5.02343	0.00737434
4237	NM_001135247,NM_001135248,NM_002403,NM_017459	MFAP2	microfibrillar associated protein 2	5.02326	0.00457032
83643	NM_001282658,NM_031455	CCDC3	coiled-coil domain containing 3	5.00525	0.0280323
55073	NR_002940	LRRC37A4P	leucine-rich repeat containing 37 member A4, pseudogene	5.00462	0.0254106
401233	NR_033884	HTATSF1P2	HIV-1 Tat specific factor 1 pseudogene 2	4.99582	0.0396429
728658	NR_026712	RPL13AP5	ribosomal protein L13a pseudogene 5	4.98511	0.00300127
79632	NM_001100411,NM_001288576,NM_024581	FAM184A	family with sequence similarity 184 member A	4.98344	0.0151273
100616425	NR_039903	MIR4748	microRNA 4748	4.98253	0.0227228
2678	NM_001288833,NM_013421,NM_013430	GGT1	gamma-glutamyltransferase 1	4.98028	0.0112595
55188	NM_018157	RIC8B	RIC8 guanine nucleotide exchange factor B	4.97409	0.000643721
349075	NM_182633	ZNF713	zinc finger protein 713	4.97162	0.0120267
131034	NM_001289112,NM_130808,NM_153429	CPNE4	copine 4	4.96092	0.0335581
10553	NM_001098520,NM_001098521,NM_001098522,NM_001098523,NM_006410	HTATIP2	HIV-1 Tat interactive protein 2	4.94466	0.00021326
6590	NM_003064	SLPI	secretory leukocyte peptidase inhibitor	4.94449	0.0220969
219347	NR_027428,NR_027429,NR_027430,NR_027431,NR_027432	TMEM254-AS1	TMEM254 antisense RNA 1	4.94405	0.00895431
64386	NM_022468	MMP25	matrix metallopeptidase 25	4.94128	0.00598555
442590	NM_001306141	SPDYE5	speedy/RINGO cell cycle regulator family member E5	4.93992	0.00549752
391	NM_001665	RHOG	ras homolog family member G	4.93912	0.00352493
6001	NM_001005339,NM_002925	RGS10	regulator of G-protein signaling 10	4.9359	0.00555166
284161	NM_001165993,NM_001165994,NM_182569	GDPD1	glycerophosphodiester phosphodiesterase domain containing 1	4.93574	0.0122866
10019	NM_001291424,NM_005475	SH2B3	SH2B adaptor protein 3	4.92248	0.00469298
9783	NM_014747	RIMS3	regulating synaptic membrane exocytosis 3	4.91726	0.00560831
100130894	NR_034083	VAC14-AS1	VAC14 antisense RNA 1	4.91576	0.0218391
91442	NM_001300978,NM_152266	FAAP24	Fanconi anemia core complex associated protein 24	4.91353	0.00423892
728323	NR_130699,NR_130700,NR_130701,NR_130702	LOC728323	uncharacterized LOC728323	4.91208	0.0044078
7349	NM_003353	UCN	urocortin	4.90926	0.01918
57519	NM_020759	STARD9	StAR related lipid transfer domain containing 9	4.90248	0.00177334
100862704	NR_046414	LINC00441	long intergenic non-protein coding RNA 441	4.90247	0.0138588
57798	NM_021167,NR_052016	GATAD1	GATA zinc finger domain containing 1	4.90194	0.00229645
3872	NM_000422	KRT17	keratin 17	4.8967	0.0149619
1193	NM_001289	CLIC2	chloride intracellular channel 2	4.891	0.0200749
105376575	NR_132751	LOC105376575	uncharacterized LOC105376575	4.88474	0.00334131
222389	NM_001100912,NM_152751	BEND7	BEN domain containing 7	4.88299	0.0124499
1953	NM_001409	MEGF6	multiple EGF like domains 6	4.88226	0.0130307
29760	NM_001114094,NM_001258440,NM_001258441,NM_001258442,NM_013314,NR_047680,NR_047681,NR_047682,NR_047683	BLNK	B-cell linker	4.87944	0.0160021
266727	NM_153487	MDGA1	MAM domain containing glycosylphosphatidylinositol anchor 1	4.87471	0.0130032
55432	NM_001276320,NM_018566	YOD1	YOD1 deubiquitinase	4.87286	0.0111894
132989	NM_144645	C4orf36	chromosome 4 open reading frame 36	4.86643	0.00501594
84541	NM_032505	KBTBD8	kelch repeat and BTB domain containing 8	4.86309	0.00488413
1282	NM_001303110,NM_001845	COL4A1	collagen type IV alpha 1	4.86279	0.0387533
51054	NR_037144	PLEKHA8P1	pleckstrin homology domain containing A8 pseudogene 1	4.86228	0.026625
120379	NM_001082619,NM_138789	PIH1D2	PIH1 domain containing 2	4.86105	0.0136345
140290	NM_144659	TCP10L	t-complex 10-like	4.85422	0.00460158
100126793	NR_004431,NR_024144,NR_024145,NR_073566,NR_073567,NR_073568	GHRLOS	ghrelin opposite strand/antisense RNA	4.84362	0.0203629
1021	NM_001145306,NM_001259	CDK6	cyclin-dependent kinase 6	4.84354	0.000545375
9497	NM_001258379,NM_001258380,NM_001321103,NM_001321104,NM_001321105,NM_001321106,NM_001321107,NM_001321108,NM_003615,NR_135541,NR_135542,NR_135543,NR_135544	SLC4A7	solute carrier family 4 member 7	4.84343	0.00662151
6277	NM_014624	S100A6	S100 calcium binding protein A6	4.8323	0.00140249
84056	NM_001014380,NM_032116	KATNAL1	katanin catalytic subunit A1 like 1	4.82431	0.00274656
84464	NM_032444	SLX4	SLX4 structure-specific endonuclease subunit	4.82105	0.00303785
643314	NM_015038	KIAA0754	KIAA0754	4.81751	0.00197473
283431	NM_001303130,NM_001303131,NM_174942	GAS2L3	growth arrest specific 2 like 3	4.81738	0.0170542
90288	NM_207307	EFCAB12	EF-hand calcium binding domain 12	4.81263	0.00509074
79191	NM_024336	IRX3	iroquois homeobox 3	4.80125	0.03099
54477	NM_001143821,NM_001190860,NM_001256470,NM_001256787,NM_019012	PLEKHA5	pleckstrin homology domain containing A5	4.7937	0.00493708
203859	NM_001142649,NM_213599	ANO5	anoctamin 5	4.79177	0.0158636
5172	NM_000441	SLC26A4	solute carrier family 26 member 4	4.79146	0.0192047
6491	NM_001048166,NM_001282936,NM_001282937,NM_001282938,NM_001282939,NM_003035	STIL	SCL/TAL1 interrupting locus	4.78581	0.0163269
51375	NM_015976,NM_152238,NR_033716	SNX7	sorting nexin 7	4.78479	0.000275676
3742	NM_002235	KCNA6	potassium voltage-gated channel subfamily A member 6	4.7753	0.0070841
1512	NM_001319137,NM_004390	CTSH	cathepsin H	4.77356	0.00176501
5923	NM_001145648,NM_002891,NM_153815	RASGRF1	Ras protein specific guanine nucleotide releasing factor 1	4.76862	0.0275814
9935	NM_005461	MAFB	v-maf avian musculoaponeurotic fibrosarcoma oncogene homolog B	4.76843	0.0212211
8522	NM_001130831,NM_003644,NM_201432,NM_201433	GAS7	growth arrest specific 7	4.76431	0.0259043
730094	NM_001164579	C16orf52	chromosome 16 open reading frame 52	4.76305	0.0033427
6173	NM_001199972,NM_021029	RPL36A	ribosomal protein L36a	4.75685	0.00114006
10863	NM_001304351,NM_014265,NM_021777,NR_130709,NR_130710	ADAM28	ADAM metallopeptidase domain 28	4.75665	0.00275449
84617	NM_001303524,NM_001303525,NM_001303526,NM_001303527,NM_001303528,NM_001303529,NM_001303530,NM_032525	TUBB6	tubulin beta 6 class V	4.75515	0.00050667
23329	NM_015279	TBC1D30	TBC1 domain family member 30	4.75309	0.00666935
5530	NM_000944,NM_001130691,NM_001130692	PPP3CA	protein phosphatase 3 catalytic subunit alpha	4.7513	0.0118294
54497	NM_019024	HEATR5B	HEAT repeat containing 5B	4.75058	0.00219489
100527960	NR_037639,NR_037640,NR_037641	MROH7-TTC4	MROH7-TTC4 readthrough (NMD candidate)	4.74907	0.00556976
90233	NM_001270938,NM_138347,NR_073102	ZNF551	zinc finger protein 551	4.74798	0.0061635
2687	NM_001099781,NM_001099782,NM_001302464,NM_001302465,NM_004121	GGT5	gamma-glutamyltransferase 5	4.74486	0.0149312
7378	NM_001287426,NM_001287428,NM_001287429,NM_001287430,NM_003364,NR_109837	UPP1	uridine phosphorylase 1	4.74485	0.00212723
199704	NM_001288800,NM_152655,NM_199126,NR_110152	ZNF585A	zinc finger protein 585A	4.74194	0.00042019
26659	NM_017506	OR7A5	olfactory receptor family 7 subfamily A member 5	4.73666	0.00375673
57507	NM_020747	ZNF608	zinc finger protein 608	4.73337	0.0388649
1124	NM_001039936,NM_001293069,NM_001293070,NM_001293071,NM_001293072,NM_001293073,NM_001293075,NM_001293076,NM_001293077,NM_001293078,NM_001293079,NM_001293080,NM_001293081,NM_004067,NR_120524,NR_120525	CHN2	chimerin 2	4.73299	0.0106574
51332	NM_016642	SPTBN5	spectrin beta, non-erythrocytic 5	4.73203	0.00691067
57828	NM_021185	CATSPERG	cation channel sperm associated auxiliary subunit gamma	4.73191	0.00586905
101927155	NR_120410,NR_120411,NR_120412	LMO7-AS1	LMO7 antisense RNA 1	4.72565	0.0358664
685	NM_001316963,NM_001729	BTC	betacellulin	4.72404	0.03272
1950	NM_001178130,NM_001178131,NM_001963	EGF	epidermal growth factor	4.72222	0.0416407
84240	NM_001131035,NM_001131036,NM_032280	ZCCHC9	zinc finger CCHC-type containing 9	4.71924	0.00352054
126014	NM_001282349,NM_001282350,NM_130771,NM_133168,NM_133169,NM_206818	OSCAR	osteoclast associated, immunoglobulin-like receptor	4.71681	0.022852
27152	NM_015693	INTU	inturned planar cell polarity protein	4.71659	0.00349959
84071	NM_001286609,NM_032131	ARMC2	armadillo repeat containing 2	4.71496	0.0247508
10516	NM_006329	FBLN5	fibulin 5	4.70967	0.00463848
83660	NM_015059	TLN2	talin 2	4.70956	0.00318201
64762	NM_001242409,NM_022751	GAREM1	GRB2 associated regulator of MAPK1 subtype 1	4.70891	0.00642033
101929664	NR_110541	HORMAD2-AS1	HORMAD2 antisense RNA 1	4.70884	0.0108645
101927117	NR_109889	PLCG1-AS1	PLCG1 antisense RNA 1	4.70026	0.00472785
9424	NM_004823	KCNK6	potassium two pore domain channel subfamily K member 6	4.69775	0.0172818
29799	NM_013313,NR_130910	YPEL1	yippee like 1	4.69515	0.00450103
2634	NM_004120	GBP2	guanylate binding protein 2	4.68524	0.0412996
79170	NM_024320	PRR15L	proline rich 15 like	4.6792	0.0085266
7295	NM_001244938,NM_003329	TXN	thioredoxin	4.67893	0.0049595
163051	NM_152601	ZNF709	zinc finger protein 709	4.67883	0.0426981
56127	NM_019119	PCDHB9	protocadherin beta 9	4.67654	0.00590711
167227	NM_001242377,NM_152624,NR_038352	DCP2	decapping mRNA 2	4.67125	0.0102324
339803	NR_036496	LOC339803	uncharacterized LOC339803	4.67108	0.0105112
79847	NM_024789	MFSD13A	major facilitator superfamily domain containing 13A	4.67	0.0155442
80862	NR_026751	ZNRD1ASP	zinc ribbon domain containing 1 antisense, pseudogene	4.66456	0.0166771
84542	NM_001129993,NM_032506	KIAA1841	KIAA1841	4.65984	0.0116036
55714	NM_001080477	TENM3	teneurin transmembrane protein 3	4.6573	0.00312681
339829	NM_181426	CCDC39	coiled-coil domain containing 39	4.65599	0.0120369
123591	NM_152335	TMEM266	transmembrane protein 266	4.65483	0.0219206
441272	NM_001004351	SPDYE3	speedy/RINGO cell cycle regulator family member E3	4.65481	0.00513759
100532724	NR_037804	NPHP3-ACAD11	NPHP3-ACAD11 readthrough (NMD candidate)	4.65276	0.0093439
51259	NM_001173990,NM_001173991,NM_016499	TMEM216	transmembrane protein 216	4.65221	0.00430169
57404	NM_177538	CYP20A1	cytochrome P450 family 20 subfamily A member 1	4.65094	0.000266416
285782	NM_001170692,NM_001170693,NM_205864	CAGE1	cancer antigen 1	4.64574	0.00854875
645682	NR_034180	POU5F1P4	POU class 5 homeobox 1 pseudogene 4	4.64559	0.0206756
116966	NM_170710,NM_181265	WDR17	WD repeat domain 17	4.64432	0.0202975
1117	NM_001025197,NM_001025199,NM_004000	CHI3L2	chitinase 3 like 2	4.63811	0.0351983
5558	NM_000947,NM_001282487,NM_001282488	PRIM2	primase (DNA) subunit 2	4.63258	0.025751
27235	NM_015697	COQ2	coenzyme Q2, polyprenyltransferase	4.63163	0.00251477
151477	NR_024079	LINC00471	long intergenic non-protein coding RNA 471	4.62948	0.00740119
84190	NM_001319675,NM_032230	METTL25	methyltransferase like 25	4.62693	0.00295205
55732	NM_001320047,NM_001320048,NM_001320050,NM_001320051,NM_018186	C1orf112	chromosome 1 open reading frame 112	4.62504	0.0050398
51170	NM_016245	HSD17B11	hydroxysteroid (17-beta) dehydrogenase 11	4.62465	0.0013678
100499405	NR_036466	LINC00987	long intergenic non-protein coding RNA 987	4.62307	0.0298293
51351	NM_015852	ZNF117	zinc finger protein 117	4.62016	0.00800793
23531	NM_012329	MMD	monocyte to macrophage differentiation associated	4.61581	0.00329686
8631	NM_001075099,NM_003726	SKAP1	src kinase associated phosphoprotein 1	4.60789	0.0399835
6296	NM_005622,NM_202000	ACSM3	acyl-CoA synthetase medium-chain family member 3	4.60678	0.0120273
51334	NM_001300783,NM_001308087,NM_001308088,NM_016644	PRR16	proline rich 16	4.60608	0.00819143
401565	NM_001001710	FAM166A	family with sequence similarity 166 member A	4.60549	0.0426168
285533	NM_173662	RNF175	ring finger protein 175	4.6049	0.0305974
143903	NM_001258390,NM_001258391,NM_001318799,NM_178834	LAYN	layilin	4.59972	0.00468072
644890	NM_001080836	MEIG1	meiosis/spermiogenesis associated 1	4.59534	0.00524243
401303	NR_023382	ZNF815P	zinc finger protein 815, pseudogene	4.59526	0.023256
100505929	NR_037585,NR_037586	LINC01549	long intergenic non-protein coding RNA 1549	4.58501	0.0267234
57678	NM_001244949,NM_020918	GPAM	glycerol-3-phosphate acyltransferase, mitochondrial	4.58023	0.0160701
643376	NM_001145101	BTBD18	BTB domain containing 18	4.57899	0.0283532
100506759	NR_002163	OR7E37P	olfactory receptor family 7 subfamily E member 37 pseudogene	4.57642	0.0275446
6517	NM_001042	SLC2A4	solute carrier family 2 member 4	4.57453	0.0176931
101929054	NR_135307	LOC101929054	uncharacterized LOC101929054	4.57369	0.0113061
347	NM_001647	APOD	apolipoprotein D	4.57323	0.0357218
127428	NM_153035,NR_130900	TCEANC2	transcription elongation factor A N-terminal and central domain containing 2	4.56877	0.00150886
84250	NM_032290	SLF1	SMC5-SMC6 complex localization factor 1	4.5673	0.0048933
26765	NR_002433	SNORD12C	small nucleolar RNA, C/D box 12C	4.56546	0.0173741
64420	NM_001282640,NM_001282643,NM_022486	SUSD1	sushi domain containing 1	4.56474	0.00740375
348110	NM_001282380,NM_182616	ARPIN	actin-related protein 2/3 complex inhibitor	4.56231	0.00162047
727910	NM_001164407	TLCD2	TLC domain containing 2	4.5558	0.00142645
100616403	NR_039840	MIR4691	microRNA 4691	4.55282	0.0195068
6210	NM_001019,NM_001030009	RPS15A	ribosomal protein S15a	4.55109	0.00166268
64863	NM_001308401,NM_022840	METTL4	methyltransferase like 4	4.55003	0.00375302
319085	NR_002808	ITPK1-AS1	ITPK1 antisense RNA 1	4.54237	0.00875712
113691	NR_003608	TUBA3FP	tubulin alpha 3f pseudogene	4.53556	0.0103142
286140	NR_003129	RNF5P1	ring finger protein 5 pseudogene 1	4.53549	0.0178851
286075	NM_001100598,NM_001100599,NM_001288805,NM_001288806,NM_001288807,NM_001288808,NM_001288809,NM_173831,NR_110190,NR_110191,NR_110192,NR_110193	ZNF707	zinc finger protein 707	4.53307	0.0138538
347918	NR_003290	EP400NL	EP400 N-terminal like	4.52881	0.026221
55561	NM_017525	CDC42BPG	CDC42 binding protein kinase gamma	4.52451	0.0333848
10940	NM_001145860,NM_001145861,NM_015029	POP1	POP1 homolog, ribonuclease P/MRP subunit	4.52278	0.00755289
101928674	NR_110845,NR_110846,NR_110847	LOC101928674	uncharacterized LOC101928674	4.52197	0.00713431
25932	NM_013943	CLIC4	chloride intracellular channel 4	4.52116	0.00369643
391712	NM_001012414	TRIM61	tripartite motif containing 61	4.51851	0.0215247
2596	NM_001130064,NM_002045	GAP43	growth associated protein 43	4.51689	0.0116271
729171	NR_003366	ANKRD20A8P	ankyrin repeat domain 20 family member A8, pseudogene	4.50979	0.0214083
3490	NM_001253835,NM_001553	IGFBP7	insulin like growth factor binding protein 7	4.50837	0.0435463
122402	NM_153046	TDRD9	tudor domain containing 9	4.506	0.00980917
146562	NM_139170	C16orf71	chromosome 16 open reading frame 71	4.50287	0.0213413
102724571	NR_132738	LOC102724571	uncharacterized LOC102724571	4.49659	0.00931795
9644	NM_014631	SH3PXD2A	SH3 and PX domains 2A	4.49163	0.00477542
[truncated: 661 more rows]
