# Supplementary material for: Integrated Analysis of Transcriptome and Proteome of the Human Cornea and Aqueous Humor Reveal Novel Biomarkers for Corneal Endothelial Cell Dysfunction
Source: Int J Mol Sci. 2023 Oct 19;24(20):15354. doi: 10.3390/ijms242015354 (PMC10607268; doi:10.3390/ijms242015354)
Supplement: Supplementary file 1 [file ijms-24-15354-s001.zip › Table S2.xlsx]

## Sheet: 2A
Table S2. (A) Biological process of upregulated differentially expressed genes in dysfunctional corneal endothelial cells
Source	Term_name	Term_ID	Adjusted_p_value	Negative_log10_of_adjusted_p_value	Term_size	Query_size	Intersection_size	Effective_domain_size	Intersections
GO:BP	cell adhesion	GO:0007155	5.9313e-08	7.22685	1421	1833	223	17847	NOTCH1,FEZ1,ANXA1,CELSR1,EPB41L4B,NINJ2,ENTPD1,SSPO,PCDHA4,DOCK8,TNN,SPARCL1,DSG3,PLXNC1,ITGA8,CD44,PTPRJ,LGALS1,PCDHB4,FAT4,FAP,CDH3,HFE,HLA-DPB1,FAT2,VWA2,SFRP2,NTNG1,SERPINF2,FBN1,PLEKHA7,PCDH12,ADAM8,CDH12,ADGRE5,DSG2,IGSF5,ITGA2B,PCDHGA8,DCHS1,DLC1,TNXB,FSTL3,STAB1,CNTN2,SRCIN1,ADAM22,TNFSF4,OMD,C1QTNF1,ISLR,TENM2,LAMA3,GATA3,IL18,LYVE1,LAMC3,LYN,NRXN2,FMN1,PAK3,TECTA,DMD,DISC1,SSPN,MUC4,CD4…
GO:BP	SRP-dependent cotranslational protein targeting to membrane	GO:0006614	8.39875e-08	7.07579	96	1833	34	17847	RPL36A,RPS15A,RPS29,RPS20,RPL12,RPL37,RPL39,RPS28,RPS12,RPL37A,RPL23,SEC61B,RPS21,RPS19,RPLP1,RPS27,RPS13,RPL30,RPS17,RPL31,RPLP2,TRAM1,RPL18A,RPS11,RPS24,RPL11,RPL34,RPL27A,RPS18,RPL32,RPS25,RPS27A,RPS14,RPL35
GO:BP	biological adhesion	GO:0022610	9.56194e-08	7.01945	1428	1833	223	17847	NOTCH1,FEZ1,ANXA1,CELSR1,EPB41L4B,NINJ2,ENTPD1,SSPO,PCDHA4,DOCK8,TNN,SPARCL1,DSG3,PLXNC1,ITGA8,CD44,PTPRJ,LGALS1,PCDHB4,FAT4,FAP,CDH3,HFE,HLA-DPB1,FAT2,VWA2,SFRP2,NTNG1,SERPINF2,FBN1,PLEKHA7,PCDH12,ADAM8,CDH12,ADGRE5,DSG2,IGSF5,ITGA2B,PCDHGA8,DCHS1,DLC1,TNXB,FSTL3,STAB1,CNTN2,SRCIN1,ADAM22,TNFSF4,OMD,C1QTNF1,ISLR,TENM2,LAMA3,GATA3,IL18,LYVE1,LAMC3,LYN,NRXN2,FMN1,PAK3,TECTA,DMD,DISC1,SSPN,MUC4,CD4…
GO:BP	establishment of protein localization to endoplasmic reticulum	GO:0072599	1.62934e-07	6.78799	113	1833	37	17847	RYR2,RPL36A,RPS15A,RPS29,RPS20,RPL12,RPL37,RPL39,SEC61G,RPS28,RPS12,RPL37A,RPL23,SEC61B,RPS21,RPS19,RPLP1,RPS27,RPS13,RPL30,RPS17,SGTB,RPL31,RPLP2,TRAM1,RPL18A,RPS11,RPS24,RPL11,RPL34,RPL27A,RPS18,RPL32,RPS25,RPS27A,RPS14,RPL35
GO:BP	protein targeting to ER	GO:0045047	2.22902e-07	6.65189	109	1833	36	17847	RPL36A,RPS15A,RPS29,RPS20,RPL12,RPL37,RPL39,SEC61G,RPS28,RPS12,RPL37A,RPL23,SEC61B,RPS21,RPS19,RPLP1,RPS27,RPS13,RPL30,RPS17,SGTB,RPL31,RPLP2,TRAM1,RPL18A,RPS11,RPS24,RPL11,RPL34,RPL27A,RPS18,RPL32,RPS25,RPS27A,RPS14,RPL35
GO:BP	cotranslational protein targeting to membrane	GO:0006613	4.11825e-07	6.38529	101	1833	34	17847	RPL36A,RPS15A,RPS29,RPS20,RPL12,RPL37,RPL39,RPS28,RPS12,RPL37A,RPL23,SEC61B,RPS21,RPS19,RPLP1,RPS27,RPS13,RPL30,RPS17,RPL31,RPLP2,TRAM1,RPL18A,RPS11,RPS24,RPL11,RPL34,RPL27A,RPS18,RPL32,RPS25,RPS27A,RPS14,RPL35
GO:BP	cytoskeleton organization	GO:0007010	1.1342e-06	5.94531	1353	1833	209	17847	MYOZ1,ANXA1,CELSR1,TPM4,EPB41L4B,HYDIN,PLEKHG2,ATF5,DNAL1,PTGER4,EML1,ECT2,WDR62,DAAM1,CFAP157,EHBP1L1,MYOM1,ANKRD53,NOS1AP,FMNL1,MTCL1,SERPINF2,ARHGAP18,F2RL1,NTF3,SHROOM3,ARHGAP10,SHANK1,MYH3,NCKAP5,FGD4,NUSAP1,DLC1,DNAAF1,TUBB1,ELMO1,TNXB,KRT16,ENAH,PLS3,CNTN2,KIF23,S1PR2,LIMK1,EPS8,MICAL1,GEN1,FSCN3,P2RX7,SHROOM4,SASS6,LDB3,AUNIP,GPSM2,FMN1,LCP1,CSF1R,PAK3,ELN,DMD,DISC1,ARAP3,CASQ1,KRT6A,PFN4…
GO:BP	ion transmembrane transport	GO:0034220	1.51266e-06	5.82026	1174	1833	186	17847	RGS2,KCNJ14,PKD1L2,SLC38A4,SLC34A2,SLC7A1,KCNS3,ATP8A1,ND4,HFE,NOS1AP,SLC22A1,CACNA1C,PRKAB2,SLC26A5,FGF14,COX1,SHANK1,TRPM3,GABRB3,KCNMB4,CHRNB2,SLC9A9,TMC5,GRIK2,ATP6,SLC1A3,KCNJ11,SCN9A,CYTB,PKD2L1,SLC4A9,P2RX7,HECW2,LYN,ATP8,ANO1,KCNE3,PM20D1,CFTR,SLC44A4,SLC16A7,TRPM1,DMD,F2R,CACNA1I,CASQ1,TRPM2,SCN11A,TRPC3,EPHB2,NEDD4,ATP13A4,SLC7A7,KCNH3,COX2,ATP8B1,SLC4A8,SHANK2,CCL2,JPH1,KCNC1,SCN1B,RYR…
GO:BP	cation transport	GO:0006812	3.70966e-06	5.43067	1195	1833	187	17847	RGS2,KCNJ14,PKD1L2,SLC38A4,SLC34A2,SLC7A1,KCNS3,FTL,ATP8A1,ND4,HFE,NOS1AP,SLC22A1,CACNA1C,FGF14,COX1,SHANK1,TRPM3,B2M,KCNMB4,CHRNB2,SLC9A9,SLC6A4,EFHB,ATP6,SLC1A3,KCNJ11,SCN9A,CYTB,PKD2L1,P2RX7,HECW2,LYN,ATP8,ANO1,KCNE3,PM20D1,SLC44A4,TRPM1,DMD,F2R,CACNA1I,CASQ1,TRPM2,SCN11A,TRPC3,CD4,EPHB2,GCK,NEDD4,ATP13A4,KCNH3,COX2,SLC4A8,SHANK2,CCL2,JPH1,HPX,KCNC1,SCN1B,RYR3,TRPV4,OTOP3,SLC36A1,PLCB1,CACNA2D…
GO:BP	movement of cell or subcellular component	GO:0006928	4.05815e-06	5.39167	2221	1833	311	17847	NOTCH1,FEZ1,ANXA1,CELSR1,TPM4,EPB41L4B,CFAP53,HYDIN,TRAK2,DOCK8,PTGER4,TNN,GCSAM,NANOS1,PLXNC1,QRICH2,SHC3,CD44,PTPRJ,ATP8A1,CKLF,CFAP157,FAP,MARVELD3,NOS1AP,FAT2,INPP5D,CACNA1C,FMNL1,ENPEP,SFRP2,ARHGAP18,F2RL1,F10,EDN2,AKAP12,ADAM8,SLC26A5,NTF3,CABYR,DSG2,MYH3,ITGA2B,DCHS1,GYPC,DLC1,DNAAF1,ENPP2,CLEC7A,ELMO1,DNAH6,KRT16,DNAH9,ENAH,CNTN2,SRCIN1,KIF23,ZEB2,LAMA3,VASH1,EPS8,GATA3,FSCN3,PROS1,LAMC3,…
GO:BP	ion transport	GO:0006811	1.60235e-05	4.79524	1717	1833	248	17847	RGS2,ANXA1,ABCA1,KCNJ14,PKD1L2,SLC38A4,CA13,SLC34A2,SLC7A1,KCNS3,FTL,ATP8A1,ND4,HFE,NOS1AP,SLC22A1,CACNA1C,PRKAB2,SLC26A5,MTTP,FGF14,COX1,SHANK1,TRPM3,GABRB3,B2M,PRELID2,KCNMB4,CHRNB2,PLSCR1,SLC9A9,SLC16A9,SLC6A4,TMC5,EFHB,PLA2G4F,GRIK2,ATP6,SLC1A3,SLC51A,KCNJ11,SCN9A,CYTB,PKD2L1,SLC4A9,KMO,P2RX7,HECW2,XKR6,LYN,ATP8,ANO1,KCNE3,PM20D1,CFTR,SLC44A4,SLC16A7,TRPM1,DMD,F2R,CACNA1I,CASQ1,TRPM2,SCN11A,T…
GO:BP	protein localization to endoplasmic reticulum	GO:0070972	1.83064e-05	4.7374	137	1833	38	17847	RYR2,RPL36A,RPS15A,RPS29,RPS20,RPL12,RPL37,RPL39,SEC61G,RPS28,LRRK2,RPS12,RPL37A,RPL23,SEC61B,RPS21,RPS19,RPLP1,RPS27,RPS13,RPL30,RPS17,SGTB,RPL31,RPLP2,TRAM1,RPL18A,RPS11,RPS24,RPL11,RPL34,RPL27A,RPS18,RPL32,RPS25,RPS27A,RPS14,RPL35
GO:BP	localization	GO:0051179	2.3542e-05	4.62816	6824	1833	813	17847	ANTXR2,PIPOX,NOTCH1,SGSM1,FEZ1,RASSF5,ACVR2B,RGS2,ANXA1,CELSR1,ISG15,ABCA1,KCNJ14,HLA-F,EPB41L4B,SYP,PKD1L2,CFAP53,SLC38A4,GNPTAB,TRAK2,DOCK8,PTGER4,TNN,CA13,ENPP3,BTBD8,SOX4,DAND5,GCSAM,SLC34A2,NANOS1,SLC7A1,PLXNC1,ITGA8,QRICH2,BARD1,ECT2,AP4S1,MCTP2,CD44,ABCA6,KCNS3,FTL,RCN3,PTPRJ,ATP8A1,RGPD2,CKLF,ND4,CFAP157,FAP,MYOM1,CDH3,PARP11,HFE,CEP128,MASP1,MARVELD3,ANKRD53,NOS1AP,FAT2,INPP5D,SLC22A1,AN…
GO:BP	actin filament-based process	GO:0030029	3.06724e-05	4.51325	771	1833	129	17847	MYOZ1,ANXA1,CELSR1,TPM4,EPB41L4B,PLEKHG2,PTGER4,ECT2,DAAM1,EHBP1L1,MYOM1,NOS1AP,CACNA1C,FMNL1,SERPINF2,ARHGAP18,F2RL1,NTF3,DSG2,SHROOM3,SHANK1,MYH3,FGD4,DLC1,ELMO1,TNXB,ENAH,PLS3,KIF23,S1PR2,LIMK1,EPS8,MICAL1,FSCN3,SHROOM4,LDB3,KCNE3,FMN1,LCP1,CSF1R,PAK3,ELN,DMD,CASQ1,PFN4,TRPM2,ARFGEF3,ANLN,CAPG,SCN1B,TRPV4,MYH11,LPAR1,CACNA2D1,EPB41L3,COBL,SPTBN2,CORO2B,SLIT2,THSD7A,RHOJ,MEF2C,MYH4,SHROOM2,ARHG…
GO:BP	cation transmembrane transport	GO:0098655	3.15827e-05	4.50055	887	1833	144	17847	RGS2,KCNJ14,PKD1L2,SLC34A2,SLC7A1,KCNS3,ATP8A1,ND4,HFE,NOS1AP,SLC22A1,CACNA1C,FGF14,COX1,SHANK1,TRPM3,KCNMB4,SLC9A9,ATP6,SLC1A3,KCNJ11,SCN9A,CYTB,PKD2L1,P2RX7,HECW2,LYN,ATP8,KCNE3,PM20D1,SLC44A4,TRPM1,DMD,F2R,CACNA1I,CASQ1,TRPM2,SCN11A,TRPC3,EPHB2,NEDD4,KCNH3,COX2,SHANK2,CCL2,JPH1,KCNC1,SCN1B,RYR3,TRPV4,OTOP3,SLC36A1,PLCB1,CACNA2D1,PPARGC1A,SLC8A2,SLC11A1,F2,NDUFA4L2,MEF2C,COX3,NIPAL4,ATP2C2,SHRO…
GO:BP	nuclear-transcribed mRNA catabolic process, nonsense-mediated decay	GO:0000184	9.80386e-05	4.0086	122	1833	34	17847	RPL36A,DCP2,RPS15A,CTIF,RPS29,RPS20,RPL12,RPL37,RPL39,RPS28,RPS12,RPL37A,RPL23,RPS21,RPS19,RPLP1,RPS27,RPS13,RPL30,RPS17,RPL31,RPLP2,RPL18A,RPS11,RPS24,RPL11,RPL34,RPL27A,RPS18,RPL32,RPS25,RPS27A,RPS14,RPL35
GO:BP	regulation of biological quality	GO:0065008	0.000111454	3.95291	4103	1833	515	17847	NOTCH1,ACVR2B,RGS2,ANXA1,ISG15,ABCA1,DNAJC16,SYP,CYP4F12,ENTPD1,PLEKHG2,DOCK8,PTGER4,DDAH1,SOX4,DAND5,SLC34A2,NANOS1,PLXNC1,BARD1,MCTP2,KCNS3,FTL,RCN3,PTPRJ,ATP8A1,LGALS1,FAP,CDH3,HFE,RAP1GAP2,NOS1AP,INPP5D,MT1X,IRS1,CADPS,GRID2IP,CACNA1C,FMNL1,ENPEP,DDC,PRKAB2,SERPINF2,ARHGAP18,FBN1,TESMIN,F2RL1,SESN3,F10,THRB,EDN2,AKAP12,ADAM8,GUCA1B,SLC26A5,MEX3D,MTTP,FGF14,DSG2,SHROOM3,SHANK1,GABRB3,B2M,MALRD…
GO:BP	locomotion	GO:0040011	0.000362246	3.441	1983	1833	272	17847	NOTCH1,FEZ1,ANXA1,CELSR1,EPB41L4B,DOCK8,PTGER4,TNN,GCSAM,NANOS1,PLXNC1,QRICH2,SHC3,CD44,PTPRJ,ATP8A1,CKLF,CFAP157,FAP,MARVELD3,FAT2,INPP5D,FMNL1,ENPEP,SFRP2,ARHGAP18,F2RL1,F10,EDN2,AKAP12,ADAM8,SLC26A5,NTF3,ITGA2B,DCHS1,GYPC,DLC1,ENPP2,CLEC7A,ELMO1,KRT16,ENAH,CNTN2,SRCIN1,ZEB2,LAMA3,VASH1,EPS8,GATA3,FSCN3,PROS1,LAMC3,CD40,IFITM1,LYN,CFAP54,BDNF,LCP1,CSF1R,NFATC2,KLF7,PAK3,DOCK4,F2R,DISC1,CACNA1I,…
GO:BP	transmembrane transport	GO:0055085	0.000509662	3.29272	1625	1833	229	17847	RGS2,ABCA1,KCNJ14,PKD1L2,SLC38A4,SLC34A2,SLC7A1,ABCA6,KCNS3,ATP8A1,ND4,HFE,NOS1AP,SLC22A1,IRS1,CACNA1C,PRKAB2,SLC26A5,FGF14,COX1,SHANK1,TRPM3,GABRB3,KCNMB4,CHRNB2,SLC17A9,SLC9A9,SLC16A9,SLC6A4,TMC5,GRIK2,ATP6,SLC1A3,SLC51A,KCNJ11,SCN9A,CYTB,PKD2L1,SLC4A9,P2RX7,HECW2,LYN,ATP8,ANO1,KCNE3,PM20D1,CFTR,SLC44A4,SLC16A7,TRPM1,DMD,F2R,CACNA1I,CASQ1,TRPM2,SCN11A,TRPC3,PSMB9,EPHB2,NEDD4,ATP13A4,SLC7A7,KCNH…
GO:BP	extracellular matrix organization	GO:0030198	0.000631811	3.19941	375	1833	71	17847	NOTCH1,ITGA8,CD44,FAP,SFRP2,SERPINF2,FBN1,ADAM8,ITGA2B,TNXB,LUM,LAMA3,LAMC3,LCP1,ELN,ADAMTS14,TNFRSF1B,JAM2,ADAMTSL4,ITGB8,COL24A1,ITGA4,GAS2,MYH11,FBN2,ADAM19,COL3A1,MMP2,SPP1,ITGB3,SCUBE3,TIMP1,ADAMTS5,ADAMTS3,MATN3,CTSS,DCN,ITGB2,ITGB6,FN1,COL1A1,ITGA11,COL15A1,FBLN2,CREB3L1,PXDN,TNFRSF11B,VCAN,ITGAL,COL10A1,LAMB4,MMP9,LAMA1,MFAP2,MMP25,COL4A1,FBLN5,SH3PXD2A,LOX,COL6A2,LAMC2,AEBP1,ANXA9,FGFR4,…
GO:BP	anatomical structure morphogenesis	GO:0009653	0.000672362	3.1724	2764	1833	360	17847	MYOZ1,NOTCH1,FEZ1,EPGN,ACVR2B,ANXA1,CELSR1,MCF2,TRAK2,DDAH1,TNN,SOX4,PLXNC1,ITGA8,ECT2,SHC3,CD44,TBX6,DAAM1,FAT4,FAP,MYOM1,CDH3,EYA4,PAX3,VWA2,CACNA1C,FMNL1,ENPEP,SFRP2,NTNG1,SERPINF2,ARHGAP18,FBN1,THRB,ADAM8,SLC26A5,NTF3,CDH12,SHROOM3,SHANK1,WNT2B,MYH3,FGD4,CHRNB2,CCDC136,DCHS1,DLC1,DNAAF1,ENPP2,SLC6A4,FER1L5,ROR1,KRT16,ENAH,STAB1,FOXP2,SLC1A3,CNTN2,SRCIN1,ZEB2,LIMK1,LAMA3,VASH1,EPS8,GATA3,DKKL1…
GO:BP	interferon-gamma-mediated signaling pathway	GO:0060333	0.000853427	3.06883	87	1833	26	17847	HLA-F,CD44,HLA-DPB1,B2M,OAS2,HLA-DRB5,NMI,NLRC5,HPX,GBP1,MT2A,TXK,HLA-DPA1,HLA-DRB1,IRF8,TRIM31,IRF4,IFI30,GBP2,TRIM21,PTPN2,PARP9,IFNGR2,HLA-B,TRIM5,SP100
GO:BP	metal ion transport	GO:0030001	0.00142525	2.84611	919	1833	141	17847	KCNJ14,PKD1L2,SLC38A4,SLC34A2,KCNS3,FTL,HFE,NOS1AP,CACNA1C,FGF14,TRPM3,B2M,KCNMB4,CHRNB2,SLC9A9,EFHB,SLC1A3,KCNJ11,SCN9A,PKD2L1,P2RX7,HECW2,LYN,KCNE3,TRPM1,DMD,F2R,CACNA1I,CASQ1,TRPM2,SCN11A,TRPC3,CD4,GCK,NEDD4,KCNH3,SLC4A8,CCL2,JPH1,HPX,KCNC1,SCN1B,RYR3,TRPV4,PLCB1,CACNA2D1,MYLK,SLC8A2,SLC11A1,F2,NIPAL4,ATP2C2,HEPHL1,SHROOM2,KCNMA1,TMEM37,NKAIN1,PTPRC,KCNJ5,CACNA1E,PTPN22,CCL3,KCNH4,CACNB2,KCNB1…
GO:BP	inorganic ion transmembrane transport	GO:0098660	0.00150703	2.82188	864	1833	134	17847	KCNJ14,PKD1L2,SLC34A2,KCNS3,ND4,HFE,NOS1AP,CACNA1C,SLC26A5,FGF14,COX1,TRPM3,GABRB3,KCNMB4,SLC9A9,ATP6,SLC1A3,KCNJ11,SCN9A,CYTB,PKD2L1,P2RX7,HECW2,LYN,ATP8,ANO1,KCNE3,PM20D1,CFTR,TRPM1,DMD,F2R,CACNA1I,CASQ1,TRPM2,SCN11A,TRPC3,NEDD4,KCNH3,COX2,JPH1,KCNC1,SCN1B,RYR3,TRPV4,OTOP3,SLC36A1,PLCB1,CACNA2D1,SLC8A2,SLC11A1,F2,NDUFA4L2,COX3,NIPAL4,ATP2C2,SHROOM2,KCNMA1,TMEM37,PTPRC,KCNJ5,CACNA1E,PTPN22,CCL3,…
GO:BP	regulation of ion transport	GO:0043269	0.00166919	2.77749	708	1833	114	17847	RGS2,KCNJ14,KCNS3,ATP8A1,HFE,NOS1AP,CACNA1C,SLC26A5,FGF14,SHANK1,B2M,CHRNB2,SLC6A4,EFHB,KCNJ11,SCN9A,KMO,P2RX7,HECW2,LYN,KCNE3,PM20D1,CFTR,DMD,F2R,CACNA1I,CASQ1,SCN11A,TRPC3,CD4,EPHB2,GCK,NEDD4,KCNH3,SHANK2,CCL2,JPH1,KCNC1,SCN1B,CACNA2D1,MYLK,PPARGC1A,F2,MEF2C,ATP2C2,KCNMA1,TMEM37,NKAIN1,KCNJ5,ITGB3,CACNA1E,PTPN22,CCL3,SYT1,KCNH4,CACNB2,KCNB1,UBASH3B,SYK,CTSS,KCNJ3,KCNJ2,FXYD5,BEST3,KCNMB1,SYT9,C…
GO:BP	actin cytoskeleton organization	GO:0030036	0.00177221	2.75149	670	1833	109	17847	MYOZ1,ANXA1,CELSR1,TPM4,EPB41L4B,PLEKHG2,PTGER4,ECT2,DAAM1,EHBP1L1,MYOM1,NOS1AP,FMNL1,SERPINF2,ARHGAP18,F2RL1,NTF3,SHROOM3,SHANK1,MYH3,FGD4,DLC1,ELMO1,TNXB,ENAH,PLS3,KIF23,S1PR2,LIMK1,EPS8,MICAL1,FSCN3,SHROOM4,LDB3,FMN1,LCP1,CSF1R,PAK3,ELN,CASQ1,PFN4,TRPM2,ARFGEF3,ANLN,CAPG,TRPV4,MYH11,LPAR1,EPB41L3,COBL,SPTBN2,CORO2B,SLIT2,THSD7A,RHOJ,MEF2C,SHROOM2,ARHGAP28,S100A10,CCL26,TMSB10,NTRK3,GPR65,WIPF1…
GO:BP	cytokine-mediated signaling pathway	GO:0019221	0.00201165	2.69645	797	1833	125	17847	XAF1,ANXA1,ISG15,CARD14,HLA-F,EDARADD,TRAIP,CD44,HLA-DPB1,INPP5D,IRS1,F2RL1,EDN2,CASP4,B2M,OAS2,CCND1,TNFSF4,GATA3,IL18,HLA-DRB5,CD40,IFITM1,SAMHD1,NMI,NLRC5,LCP1,CSF1R,RSAD2,ECM1,CD4,PSMB9,IL27RA,TNFRSF1B,CCL2,HPX,CASP1,ANGPT1,MX2,PLCB1,IRAK3,GBP1,SLIT2,IL4R,MT2A,MMP2,PTPRZ1,IL15,CD74,PTPRC,IL1R1,CCL26,NOD2,CCL3,TIMP1,FPR1,PYDC1,ACKR4,CCL3L3,IL10RA,SYK,TXK,HLA-DPA1,HLA-DRB1,ITGB2,IRF8,FN1,IL12RB…
GO:BP	cell activation	GO:0001775	0.00243731	2.61309	1455	1833	205	17847	ANXA1,HLA-F,FANCA,DOCK8,PTGER4,ENPP3,SOX4,CD44,FTL,PTPRJ,ATP8A1,LGALS1,HFE,HLA-DPB1,INPP5D,ITM2A,F2RL1,EDN2,AKAP12,ADAM8,ADGRE5,B2M,CHRNB2,ITGA2B,PLSCR1,CLEC7A,PIK3R5,TNFSF4,POU2F2,C1QTNF1,GATA3,LAT2,IL18,RAB31,P2RX7,CD40,LYN,LCP1,NFATC2,PAK3,F2R,RSAD2,TRPM2,TRPC3,CD4,IL27RA,TNFRSF1B,CCL2,ITGA4,TLR6,GNG2,ULBP1,BMP4,PLCB1,SKAP2,ATAD5,CLEC4A,HDAC9,C5AR1,MME,IL4R,SLC11A1,RASAL3,COL3A1,TMEM106A,C3,F2…
GO:BP	cell motility	GO:0048870	0.00246774	2.6077	1752	1833	240	17847	NOTCH1,ANXA1,CELSR1,EPB41L4B,DOCK8,PTGER4,TNN,GCSAM,NANOS1,PLXNC1,QRICH2,CD44,PTPRJ,ATP8A1,CKLF,CFAP157,FAP,MARVELD3,FAT2,INPP5D,FMNL1,ENPEP,SFRP2,ARHGAP18,F2RL1,F10,EDN2,AKAP12,ADAM8,SLC26A5,NTF3,ITGA2B,DCHS1,GYPC,DLC1,ENPP2,CLEC7A,ELMO1,KRT16,ENAH,CNTN2,SRCIN1,ZEB2,LAMA3,VASH1,EPS8,GATA3,FSCN3,PROS1,LAMC3,CD40,IFITM1,LYN,CFAP54,LCP1,CSF1R,NFATC2,PAK3,DOCK4,F2R,DISC1,CACNA1I,GPX1,TRPM2,ECM1,DNAH…
GO:BP	localization of cell	GO:0051674	0.00246774	2.6077	1752	1833	240	17847	NOTCH1,ANXA1,CELSR1,EPB41L4B,DOCK8,PTGER4,TNN,GCSAM,NANOS1,PLXNC1,QRICH2,CD44,PTPRJ,ATP8A1,CKLF,CFAP157,FAP,MARVELD3,FAT2,INPP5D,FMNL1,ENPEP,SFRP2,ARHGAP18,F2RL1,F10,EDN2,AKAP12,ADAM8,SLC26A5,NTF3,ITGA2B,DCHS1,GYPC,DLC1,ENPP2,CLEC7A,ELMO1,KRT16,ENAH,CNTN2,SRCIN1,ZEB2,LAMA3,VASH1,EPS8,GATA3,FSCN3,PROS1,LAMC3,CD40,IFITM1,LYN,CFAP54,LCP1,CSF1R,NFATC2,PAK3,DOCK4,F2R,DISC1,CACNA1I,GPX1,TRPM2,ECM1,DNAH…
GO:BP	protein targeting to membrane	GO:0006612	0.00251967	2.59866	195	1833	43	17847	MTCL1,KCNB1,USP17L2,ITGB2,NCF1,RPL36A,RPS15A,RPS29,RPS20,RPL12,RPL37,RPL39,RPS28,RPS12,FYN,RPL37A,RPL23,SEC61B,RPS21,RPS19,RPLP1,RPS27,RPS13,RPL30,RPS17,SGTB,RPL31,ZDHHC23,RPLP2,TRAM1,RPL18A,ZDHHC20,RPS11,RPS24,RPL11,RPL34,RPL27A,RPS18,RPL32,RPS25,RPS27A,RPS14,RPL35
GO:BP	anatomical structure development	GO:0048856	0.00293439	2.53248	6028	1833	711	17847	MYOZ1,NOTCH1,PRDM15,FEZ1,PI16,EPGN,ACVR2B,RGS2,ANXA1,CELSR1,ISG15,NINJ2,POU6F1,KRT24,CFAP53,MCF2,HYDIN,FANCA,OLFML3,NLN,SSPO,ATF5,PCDHA4,DCT,TRAK2,PTGER4,DDAH1,TNN,EDARADD,LCLAT1,TANC2,EML1,BTBD8,ZFP14,DSG3,SOX4,DAND5,TDRD5,SLC34A2,PTCH2,NANOS1,CMIP,PLXNC1,ITGA8,ECT2,SHC3,WDR62,MCTP2,CD44,RCN3,PTPRJ,TBX6,DAAM1,LGALS1,PCDHB4,ND4,CFAP157,FAT4,FAP,MYOM1,CDH3,HFE,TNFSF10,RAP1GAP2,C2ORF40,EYA4,INPP5D,…
GO:BP	inorganic cation transmembrane transport	GO:0098662	0.00315238	2.50136	780	1833	122	17847	KCNJ14,PKD1L2,SLC34A2,KCNS3,ND4,HFE,NOS1AP,CACNA1C,FGF14,COX1,TRPM3,KCNMB4,SLC9A9,ATP6,SLC1A3,KCNJ11,SCN9A,CYTB,PKD2L1,P2RX7,HECW2,LYN,ATP8,KCNE3,PM20D1,TRPM1,DMD,F2R,CACNA1I,CASQ1,TRPM2,SCN11A,TRPC3,NEDD4,KCNH3,COX2,JPH1,KCNC1,SCN1B,RYR3,TRPV4,OTOP3,SLC36A1,PLCB1,CACNA2D1,SLC8A2,SLC11A1,F2,NDUFA4L2,COX3,NIPAL4,ATP2C2,SHROOM2,KCNMA1,TMEM37,PTPRC,KCNJ5,CACNA1E,PTPN22,CCL3,KCNH4,CACNB2,KCNB1,RYR1,P…
GO:BP	extracellular structure organization	GO:0043062	0.00364685	2.43808	429	1833	76	17847	NOTCH1,ABCA1,TEX14,ITGA8,CD44,FAP,SFRP2,SERPINF2,FBN1,ADAM8,MTTP,ITGA2B,TNXB,LUM,LAMA3,LAMC3,ALB,LCP1,ELN,ADAMTS14,TNFRSF1B,JAM2,ADAMTSL4,ITGB8,COL24A1,ITGA4,LPA,GAS2,MYH11,FBN2,ADAM19,COL3A1,MMP2,SPP1,ITGB3,SCUBE3,TIMP1,ADAMTS5,ADAMTS3,MATN3,CTSS,DCN,ITGB2,ITGB6,FN1,COL1A1,ITGA11,COL15A1,FBLN2,CREB3L1,PXDN,TNFRSF11B,VCAN,ITGAL,COL10A1,LAMB4,MMP9,LAMA1,MFAP2,MMP25,COL4A1,FBLN5,SH3PXD2A,LOX,COL6A2…
GO:BP	regulated exocytosis	GO:0045055	0.00412205	2.38489	792	1833	123	17847	NOTCH1,HLA-F,SYP,CD44,FTL,PTPRJ,ATP8A1,CADPS,SERPINF2,F2RL1,ADAM8,ADGRE5,B2M,CHRNB2,ITGA2B,ISLR,MICAL1,LAT2,RAB31,P2RX7,PROS1,LYN,STX1B,ALB,CACNA1I,TRPM2,ECM1,TNFRSF1B,SRGN,C5AR1,MME,IL4R,SLC11A1,RAB15,C3,ACPP,FGL2,PIGR,OLR1,ATP8B4,PTPRC,ITGB3,CD14,CCL3,TIMP1,SYT1,CD109,ABCC4,CACNB2,KCNB1,PPFIA2,S100A11,FPR1,ABCA12,GLIPR1,RIMS2,FERMT3,BIN2,SYK,MGST1,CTSS,ITGB2,SIRPB1,FN1,GMFG,SYT9,HPSE,SERPINA1,L…
GO:BP	secretion	GO:0046903	0.00584186	2.23345	1686	1833	230	17847	NOTCH1,ACVR2B,ANXA1,ISG15,ABCA1,HLA-F,SYP,GNPTAB,PTGER4,SOX4,MCTP2,CD44,KCNS3,FTL,RCN3,PTPRJ,ATP8A1,CKLF,MYOM1,HFE,IRS1,CADPS,CACNA1C,SERPINF2,F2RL1,AKAP12,ADAM8,GUCA1B,MTTP,NLRC4,ADGRE5,B2M,KCNMB4,CHRNB2,ITGA2B,CORIN,SLC17A9,OAS2,CCND1,SLC6A4,PRSS12,PLA2G4F,BTN3A2,SLC1A3,SLC51A,KCNJ11,ILDR2,SRCIN1,TNFSF4,POU2F2,C1QTNF1,ISLR,MICAL1,GATA3,LAT2,RAB31,KMO,ICA1,P2RX7,PROS1,CD40,LYN,NRXN2,ANO1,STX1B,A…
GO:BP	establishment of localization	GO:0051234	0.00648923	2.18781	5419	1833	643	17847	ANTXR2,PIPOX,NOTCH1,SGSM1,FEZ1,ACVR2B,RGS2,ANXA1,ISG15,ABCA1,KCNJ14,HLA-F,SYP,PKD1L2,CFAP53,SLC38A4,GNPTAB,TRAK2,PTGER4,CA13,ENPP3,BTBD8,SOX4,SLC34A2,SLC7A1,ITGA8,BARD1,ECT2,AP4S1,MCTP2,CD44,ABCA6,KCNS3,FTL,RCN3,PTPRJ,ATP8A1,RGPD2,CKLF,ND4,MYOM1,CDH3,PARP11,HFE,MASP1,ANKRD53,NOS1AP,SLC22A1,ANKRD50,IRS1,CADPS,CACNA1C,DDC,MTCL1,PRKAB2,MDFIC,SERPINF2,F2RL1,F10,RAB32,AKAP12,ADAM8,GUCA1B,SLC26A5,NTF3,…
GO:BP	positive regulation of molecular function	GO:0044093	0.00742496	2.12931	1786	1833	241	17847	SGSM1,EPGN,ACVR2B,RGS2,CARD14,DOCK8,ESR2,ECT2,ARHGAP11A,CD44,RCN3,RGPD2,CDH3,MOB1B,HFE,TNFSF10,RAP1GAP2,NOS1AP,IRS1,CACNA1C,MTCL1,SFRP2,MDFIC,ARHGAP18,F2RL1,EDN2,ADAM8,GUCA1B,NTF3,NLRC4,CASP4,FGF14,ARHGAP10,B2M,SPDYA,PLSCR1,DTX3L,AGAP5,CCND1,DLC1,MAP3K15,ROR1,ERN2,CLEC7A,PIK3R5,RGPD3,KCNJ11,SRCIN1,RASGRP3,TP73,S1PR2,ZEB2,GATA3,IL18,P2RX7,CD40,LYN,KCNE3,CFTR,BDNF,CSF1R,PAK3,DOCK4,DMD,F2R,ARAP3,RIN…
GO:BP	action potential	GO:0001508	0.00855628	2.06772	133	1833	32	17847	NOS1AP,CACNA1C,DSG2,KCNMB4,CHRNB2,GRIK2,SCN9A,KCNE3,DMD,CACNA1I,SCN11A,SCN1B,CACNA2D1,KCNJ5,NTRK3,CACNB2,KCNB1,KCNJ3,KCNJ2,NRCAM,KCNMB3,SCN8A,SCN2B,SLC8A1,FGF12,GJA5,RYR2,PTPN3,PKP2,KCNMB2,BIN1,FKBP1B
GO:BP	viral transcription	GO:0019083	0.0093037	2.03134	178	1833	39	17847	MDFIC,CCL3,POU2F3,TRIM31,RPL36A,RPS15A,TRIM21,RPS29,RPS20,RPL12,IFITM3,RPL37,RPL39,RPS28,RPS12,RPL37A,RPL23,RPS21,RPS19,RPLP1,RPS27,RPS13,RPL30,RPS17,SP1,RPL31,RPLP2,RPL18A,RPS11,RPS24,RPL11,RPL34,RPL27A,RPS18,RPL32,RPS25,RPS27A,RPS14,RPL35
GO:BP	regulation of localization	GO:0032879	0.00992469	2.00328	2893	1833	366	17847	NOTCH1,FEZ1,RASSF5,RGS2,ANXA1,ABCA1,KCNJ14,HLA-F,EPB41L4B,SYP,DOCK8,PTGER4,TNN,SOX4,GCSAM,PLXNC1,BARD1,ECT2,MCTP2,KCNS3,PTPRJ,ATP8A1,MYOM1,CDH3,HFE,MARVELD3,NOS1AP,IRS1,CADPS,CACNA1C,MTCL1,SFRP2,MDFIC,ARHGAP18,F2RL1,F10,EDN2,AKAP12,ADAM8,SLC26A5,NTF3,FGF14,DSG2,SHANK1,B2M,KCNMB4,CHRNB2,ITGA2B,CORIN,DTX3L,OAS2,DLC1,DNAAF1,ENPP2,SLC6A4,EFHB,CLEC7A,KRT16,KCNJ11,SRCIN1,SCN9A,TNFSF4,TP73,C1QTNF1,STON1…
GO:BP	response to external stimulus	GO:0009605	0.0109466	1.96072	2887	1833	365	17847	MYOZ1,NOTCH1,FEZ1,XAF1,ANXA1,ISG15,ABCA1,HLA-F,PKD1L2,FANCA,PTGER4,ENPP3,PLXNC1,POLR3G,SHC3,CD44,PTPRJ,CKLF,FAP,HFE,HLA-DPB1,MASP1,HLCS,SFRP2,SERPINF2,F2RL1,SESN3,RAB32,EDN2,AKAP12,ADAM8,GUCA1B,SLC26A5,NTF3,NLRC4,CASP4,SHROOM3,SHANK1,TRPM3,B2M,WNT2B,PLSCR1,DTX3L,OAS2,KREMEN1,CFB,CCND1,TNIP3,ENPP2,SLC6A4,CLEC7A,KRT16,ENAH,STAB1,FOXP2,SLC1A3,CNTN2,KCNJ11,TNFSF4,C1QTNF1,CYTB,GATA3,CYP26A1,PKD2L1,IL1…
GO:BP	secretion by cell	GO:0032940	0.0122127	1.91319	1549	1833	212	17847	NOTCH1,ACVR2B,ANXA1,ISG15,ABCA1,HLA-F,SYP,GNPTAB,PTGER4,SOX4,MCTP2,CD44,KCNS3,FTL,RCN3,PTPRJ,ATP8A1,CKLF,MYOM1,HFE,IRS1,CADPS,CACNA1C,SERPINF2,F2RL1,AKAP12,ADAM8,MTTP,NLRC4,ADGRE5,B2M,KCNMB4,CHRNB2,ITGA2B,SLC17A9,SLC6A4,PRSS12,BTN3A2,SLC1A3,KCNJ11,ILDR2,SRCIN1,TNFSF4,POU2F2,C1QTNF1,ISLR,MICAL1,GATA3,LAT2,RAB31,KMO,ICA1,P2RX7,PROS1,CD40,LYN,NRXN2,ANO1,STX1B,ALB,CFTR,SLC44A4,CSF1R,KLF7,F2R,CACNA1I,…
GO:BP	cell-cell adhesion	GO:0098609	0.0134005	1.87288	851	1833	128	17847	ANXA1,CELSR1,NINJ2,PCDHA4,DOCK8,SPARCL1,DSG3,ITGA8,CD44,LGALS1,PCDHB4,FAT4,CDH3,HFE,HLA-DPB1,FAT2,NTNG1,SERPINF2,PLEKHA7,PCDH12,ADAM8,CDH12,DSG2,IGSF5,ITGA2B,PCDHGA8,DCHS1,FSTL3,CNTN2,TNFSF4,C1QTNF1,TENM2,LAMA3,GATA3,IL18,LYN,NRXN2,PAK3,CD4,JAM2,CCL2,ITGA4,ADGRV1,TRPV4,BMP4,ADAM19,GPC6,IL4R,RASAL3,SDK1,FGL2,IL15,PAG1,CD74,PTPRC,CRB1,PCDH9,GLI2,ITGB3,NEGR1,PTPN22,NOD2,ADGRL3,S100A11,PIK3R6,UBASH3B…
GO:BP	multicellular organism development	GO:0007275	0.0137186	1.86269	5532	1833	652	17847	MYOZ1,NOTCH1,PRDM15,FEZ1,PI16,EPGN,ACVR2B,RGS2,ANXA1,CELSR1,ISG15,NINJ2,POU6F1,KRT24,CFAP53,MCF2,HYDIN,FANCA,OLFML3,NLN,SSPO,ATF5,PCDHA4,DCT,TRAK2,PTGER4,DDAH1,TNN,EDARADD,LCLAT1,TANC2,EML1,BTBD8,ZFP14,DSG3,SOX4,DAND5,TDRD5,SLC34A2,PTCH2,NANOS1,CMIP,PLXNC1,ITGA8,ECT2,SHC3,WDR62,MCTP2,CD44,RCN3,PTPRJ,TBX6,DAAM1,LGALS1,PCDHB4,ND4,FAT4,FAP,MYOM1,CDH3,HFE,TNFSF10,RAP1GAP2,C2ORF40,EYA4,INPP5D,ZGLP1,PA…
GO:BP	myeloid leukocyte activation	GO:0002274	0.0147114	1.83235	653	1833	103	17847	ENPP3,CD44,FTL,PTPRJ,ATP8A1,F2RL1,EDN2,ADAM8,ADGRE5,B2M,PLSCR1,LAT2,IL18,RAB31,LYN,TRPM2,TNFRSF1B,TLR6,C5AR1,MME,IL4R,SLC11A1,TMEM106A,C3,ACPP,FGL2,IL15,PIGR,OLR1,ATP8B4,CD74,PTPRC,BATF3,CD14,CCL3,S100A11,FPR1,MAPT,GLIPR1,BIN2,SYK,MGST1,CTSS,ITGB2,SIRPB1,HAVCR2,GMFG,HPSE,SERPINA1,SLC7A2,LRMP,ADGRE2,ARHGAP9,IRF4,CD68,ITGAL,CD53,S100A9,S100A8,EPX,CD84,MMP9,CEACAM8,LYZ,C1QA,ABCA13,SLPI,MMP25,RHOG,CT…
GO:BP	cell development	GO:0048468	0.0153985	1.81252	2196	1833	286	17847	MYOZ1,NOTCH1,FEZ1,PI16,RGS2,MCF2,HYDIN,ATF5,DCT,TRAK2,TNN,BTBD8,SOX4,TDRD5,NANOS1,PLXNC1,ITGA8,ECT2,SHC3,TBX6,LGALS1,CFAP157,FAT4,MYOM1,RAP1GAP2,ZGLP1,VWA2,SFRP2,NTNG1,FBN1,F2RL1,THRB,PCDH12,ASPA,NTF3,CABYR,SHROOM3,SHANK1,GABRB3,B2M,MYH3,CHRNB2,CCDC136,KREMEN1,SLC6A4,ROR1,CLEC7A,SEZ6,ENAH,SLC1A3,CNTN2,LRRK1,SRCIN1,ADAM22,TP73,S1PR2,POU2F2,ZEB2,TENM2,LIMK1,GATA3,FSCN3,HECW2,LAMC3,LYN,TSPAN2,LDB3,S…
GO:BP	export from cell	GO:0140352	0.0203236	1.692	1595	1833	216	17847	NOTCH1,ACVR2B,ANXA1,ISG15,ABCA1,HLA-F,SYP,GNPTAB,PTGER4,SOX4,MCTP2,CD44,KCNS3,FTL,RCN3,PTPRJ,ATP8A1,CKLF,MYOM1,HFE,IRS1,CADPS,CACNA1C,SERPINF2,F2RL1,AKAP12,ADAM8,MTTP,NLRC4,ADGRE5,B2M,KCNMB4,CHRNB2,ITGA2B,SLC17A9,SLC6A4,PRSS12,BTN3A2,SLC1A3,KCNJ11,ILDR2,SRCIN1,TNFSF4,POU2F2,C1QTNF1,ISLR,MICAL1,GATA3,LAT2,RAB31,KMO,ICA1,P2RX7,PROS1,CD40,LYN,NRXN2,ANO1,KCNE3,STX1B,ALB,CFTR,SLC44A4,CSF1R,KLF7,F2R,CA…
GO:BP	transport	GO:0006810	0.0212347	1.67295	5296	1833	625	17847	ANTXR2,PIPOX,NOTCH1,SGSM1,FEZ1,ACVR2B,RGS2,ANXA1,ISG15,ABCA1,KCNJ14,HLA-F,SYP,PKD1L2,CFAP53,SLC38A4,GNPTAB,TRAK2,PTGER4,CA13,ENPP3,BTBD8,SOX4,SLC34A2,SLC7A1,BARD1,ECT2,AP4S1,MCTP2,CD44,ABCA6,KCNS3,FTL,RCN3,PTPRJ,ATP8A1,RGPD2,CKLF,ND4,MYOM1,CDH3,PARP11,HFE,MASP1,NOS1AP,SLC22A1,ANKRD50,IRS1,CADPS,CACNA1C,DDC,MTCL1,PRKAB2,MDFIC,SERPINF2,F2RL1,F10,RAB32,AKAP12,ADAM8,GUCA1B,SLC26A5,NTF3,MTTP,VAMP5,NLR…
GO:BP	developmental process	GO:0032502	0.0224077	1.6496	6449	1833	747	17847	MYOZ1,NOTCH1,PRDM15,FEZ1,PI16,EPGN,ACVR2B,RGS2,ANXA1,CELSR1,ISG15,ABCA1,TPM4,NINJ2,SYP,POU6F1,KRT24,CFAP53,MCF2,HYDIN,FANCA,OLFML3,NLN,SSPO,ATF5,PCDHA4,DCT,TRAK2,PTGER4,DDAH1,TNN,EDARADD,LCLAT1,TANC2,EML1,BTBD8,ZFP14,DSG3,SOX4,DAND5,TDRD5,SLC34A2,PTCH2,NANOS1,CMIP,PLXNC1,ITGA8,ECT2,SHC3,WDR62,MCTP2,CD44,RBL1,RCN3,PTPRJ,TBX6,DAAM1,LGALS1,PCDHB4,ND4,CFAP157,FAT4,FAP,MYOM1,CDH3,PARP11,HFE,TNFSF10,RA…
GO:BP	positive regulation of catalytic activity	GO:0043085	0.0230099	1.63809	1427	1833	196	17847	SGSM1,EPGN,ACVR2B,RGS2,CARD14,DOCK8,ECT2,ARHGAP11A,CD44,RCN3,RGPD2,CDH3,MOB1B,TNFSF10,RAP1GAP2,NOS1AP,IRS1,CACNA1C,MTCL1,SFRP2,MDFIC,ARHGAP18,F2RL1,EDN2,ADAM8,GUCA1B,NTF3,NLRC4,CASP4,ARHGAP10,SPDYA,PLSCR1,DTX3L,AGAP5,CCND1,DLC1,MAP3K15,ERN2,CLEC7A,PIK3R5,RGPD3,SRCIN1,RASGRP3,TP73,S1PR2,ZEB2,IL18,P2RX7,CD40,LYN,BDNF,CSF1R,PAK3,DOCK4,F2R,ARAP3,RIN3,CD4,ARRDC4,NEK10,RFPL1,CCL2,RGPD4,CASP1,TLR6,ANGPT…
GO:BP	multicellular organismal signaling	GO:0035637	0.0240072	1.61966	205	1833	42	17847	KCNJ14,CACNA1C,DSG2,KCNMB4,CORIN,GRIK2,KCNJ11,SCN9A,KCNE3,CACNA1I,CASQ1,SCN11A,SCN1B,RYR3,CACNA2D1,TYMP,SLC8A2,KCNJ5,NTRK3,CACNB2,RYR1,KCNJ3,KCNJ2,ATP2B2,NRCAM,KCNMB3,SCN8A,CNTNAP2,SCN2B,SLC8A1,FGF12,GJA5,RYR2,NKX2-5,KCNK6,PKP2,KCNMB2,CACNG8,BIN1,CALM2,SPTBN4,FKBP1B
GO:BP	response to cytokine	GO:0034097	0.0244465	1.61178	1217	1833	171	17847	XAF1,ANXA1,ISG15,CARD14,HLA-F,MCF2,DOCK8,TEX14,EDARADD,TRAIP,CD44,HLA-DPB1,INPP5D,MT1X,IRS1,OCLN,F2RL1,EDN2,AKAP12,CASP4,B2M,PLSCR1,OAS2,CCND1,KCNJ11,TNFSF4,GNPNAT1,EPS8,GATA3,PTPN5,IL18,KMO,HLA-DRB5,CD40,IFITM1,SAMHD1,NMI,NLRC5,LCP1,CSF1R,RSAD2,ECM1,HNMT,CD4,PSMB9,IL27RA,TNFRSF1B,CCL2,ITGA4,HPX,AANAT,CASP1,ANGPT1,MX2,PLCB1,ACP5,IRAK3,GBP1,PPARGC1A,MME,SLIT2,IL4R,SLC11A1,MT2A,COL3A1,MMP2,PTPRZ1,I…
GO:BP	leukocyte activation	GO:0045321	0.0284156	1.54644	1296	1833	180	17847	ANXA1,HLA-F,FANCA,DOCK8,PTGER4,ENPP3,SOX4,CD44,FTL,PTPRJ,ATP8A1,LGALS1,HFE,HLA-DPB1,INPP5D,ITM2A,F2RL1,EDN2,ADAM8,ADGRE5,B2M,CHRNB2,PLSCR1,CLEC7A,TNFSF4,POU2F2,GATA3,LAT2,IL18,RAB31,P2RX7,CD40,LYN,LCP1,NFATC2,PAK3,RSAD2,TRPM2,CD4,IL27RA,TNFRSF1B,CCL2,ITGA4,TLR6,ULBP1,BMP4,SKAP2,ATAD5,CLEC4A,HDAC9,C5AR1,MME,IL4R,SLC11A1,RASAL3,TMEM106A,C3,ACPP,APBB1IP,FGL2,MEF2C,IL15,PIGR,IKZF3,OLR1,ATP8B4,PAG1,CD…
GO:BP	cellular response to cytokine stimulus	GO:0071345	0.030388	1.5173	1121	1833	159	17847	XAF1,ANXA1,ISG15,CARD14,HLA-F,MCF2,DOCK8,TEX14,EDARADD,TRAIP,CD44,HLA-DPB1,INPP5D,MT1X,IRS1,OCLN,F2RL1,EDN2,AKAP12,CASP4,B2M,OAS2,CCND1,KCNJ11,TNFSF4,GNPNAT1,EPS8,GATA3,PTPN5,IL18,KMO,HLA-DRB5,CD40,IFITM1,SAMHD1,NMI,NLRC5,LCP1,CSF1R,RSAD2,ECM1,CD4,PSMB9,IL27RA,TNFRSF1B,CCL2,ITGA4,HPX,CASP1,ANGPT1,MX2,PLCB1,IRAK3,GBP1,PPARGC1A,MME,SLIT2,IL4R,MT2A,MMP2,PTPRZ1,IL15,ST3GAL6,BRCA1,CD74,PTPRC,IL1R1,CCL…
GO:BP	exocytosis	GO:0006887	0.0304443	1.51649	906	1833	133	17847	NOTCH1,ANXA1,HLA-F,SYP,CD44,FTL,PTPRJ,ATP8A1,CADPS,SERPINF2,F2RL1,ADAM8,ADGRE5,B2M,CHRNB2,ITGA2B,SLC17A9,PRSS12,SRCIN1,ISLR,MICAL1,LAT2,RAB31,P2RX7,PROS1,LYN,STX1B,ALB,CFTR,CACNA1I,TRPM2,ECM1,TNFRSF1B,SRGN,C5AR1,MME,TNFAIP2,IL4R,SLC11A1,RAB15,C3,ACPP,FGL2,PIGR,SYTL2,OLR1,ATP8B4,PTPRC,ITGB3,CD14,CCL3,TIMP1,SYT1,CD109,ABCC4,CACNB2,KCNB1,PPFIA2,S100A11,FPR1,ABCA12,GLIPR1,RIMS2,FERMT3,BIN2,SYK,MGST1,…
GO:BP	cellular component morphogenesis	GO:0032989	0.0327912	1.48424	1156	1833	163	17847	MYOZ1,NOTCH1,FEZ1,ANXA1,MCF2,TRAK2,TNN,PLXNC1,ITGA8,ECT2,SHC3,CD44,MYOM1,CDH3,VWA2,FMNL1,NTNG1,ARHGAP18,ADAM8,SLC26A5,NTF3,CDH12,SHROOM3,SHANK1,MYH3,FGD4,CHRNB2,CCDC136,DLC1,ENPP2,ENAH,SLC1A3,CNTN2,SRCIN1,ZEB2,LIMK1,EPS8,GATA3,P2RX7,HECW2,LAMC3,LDB3,BDNF,CSF1R,KLF7,PAK3,DMD,DISC1,CASQ1,CHODL,EPHB2,NEDD4,PLXNA2,SHANK2,CCL2,ITGA4,SCN1B,SEMA6A,GAS2,MYH11,LPAR1,EPB41L3,COBL,PLEKHO1,SPTBN2,GBP1,SLIT2,…
GO:BP	cell morphogenesis	GO:0000902	0.0370741	1.43093	1050	1833	150	17847	NOTCH1,FEZ1,ANXA1,MCF2,TRAK2,TNN,PLXNC1,ITGA8,ECT2,SHC3,CD44,CDH3,VWA2,FMNL1,NTNG1,ARHGAP18,ADAM8,SLC26A5,NTF3,CDH12,SHROOM3,SHANK1,FGD4,CHRNB2,DLC1,ENPP2,ENAH,SLC1A3,CNTN2,SRCIN1,ZEB2,LIMK1,EPS8,GATA3,P2RX7,HECW2,LAMC3,BDNF,CSF1R,KLF7,PAK3,DMD,DISC1,CHODL,EPHB2,NEDD4,PLXNA2,SHANK2,CCL2,ITGA4,SCN1B,SEMA6A,GAS2,LPAR1,EPB41L3,COBL,PLEKHO1,SPTBN2,GBP1,SLIT2,PALM2,RHOJ,F2,MEF2C,DCLK1,PTPRZ1,PLXNA4,SO…
GO:BP	response to interferon-gamma	GO:0034341	0.0426152	1.37044	196	1833	40	17847	HLA-F,CD44,HLA-DPB1,B2M,OAS2,HLA-DRB5,IFITM1,NMI,NLRC5,CCL2,HPX,CASP1,GBP1,SLC11A1,MT2A,CCL26,CCL3,GBP4,MRC1,CCL3L3,TXK,HLA-DPA1,HLA-DRB1,IRF8,STAR,TRIM31,IRF4,IFI30,KYNU,GBP2,TRIM21,PTPN2,IFITM3,PARP9,IFNGR2,HLA-B,IFITM2,TRIM5,WNT5A,SP100

## Sheet: 2B
Table S2. (B) Biological process of downregulated differentially expressed genes in dysfunctional corneal endothelial cells
Source	Term_name	Term_ID	Adjusted_p_value	Negative_log10_of_adjusted_p_value	Term_size	Query_size	Intersection_size	Effective_domain_size	Intersections
GO:BP	cellular metabolic process	GO:0044237	7.24414e-14	13.14	10785	1660	1160	17847	PLK5,CA3,DDB1,RBM38,MAPK4,ITM2C,ZDHHC14,APP,COL4A3,AFAP1L2,SH3BP4,HSPA5,SCD,PBXIP1,DDIT4,ADCYAP1R1,ACOT11,PDZRN3,ETNPPL,SDHA,EGLN3,PTPRM,SLC2A1,DEGS2,DNAJC6,ATP1A1,DDR1,PITPNM1,CAMSAP3,ENO2,TRIB2,NDNF,MYOC,ALX4,MKRN3,PFKP,ESRRA,SPON1,NR4A1,CPAMD8,SFRP1,RORC,PLCE1,SLC29A1,TGFBR3,DHCR24,FGF7,TOB1,ZNF224,LDLRAP1,EDN3,PIP5K1B,ERBB2,ACHE,CA9,FADS2,LAMB1,CTH,ABCG1,NOG,WFS1,MAP3K12,LEMD3,PACSIN3,NOL3,ER…
GO:BP	small molecule metabolic process	GO:0044281	6.1659e-13	12.21	1991	1660	291	17847	DDB1,APP,SCD,DDIT4,ADCYAP1R1,ACOT11,SDHA,EGLN3,SLC2A1,DEGS2,ENO2,NDNF,PFKP,RORC,PLCE1,DHCR24,LDLRAP1,FADS2,CTH,ABCG1,GOT1,ALDH1A2,LDLR,CDS1,CHKA,AHCYL1,LDHD,NR1D1,PFKM,PFKFB4,ALDH5A1,SYNJ1,ISYNA1,ACADS,SREBF1,PDE4B,PLCH1,SCARB1,PLOD1,FAR2,SORBS1,INSIG1,CYP39A1,ACO2,DCAKD,GHR,NFE2L1,PLCG2,ADSSL1,B4GAT1,HADH,GPI,MPP1,ITPKB,PDXP,PANK4,DHCR7,GLUL,PCCA,ALDH7A1,EPHX2,XYLT2,ENO1,PDHX,ACSS2,PRUNE2,DARS2,…
GO:BP	cellular catabolic process	GO:0044248	7.28346e-12	11.1377	2287	1660	320	17847	DDB1,RBM38,APP,SH3BP4,HSPA5,TRIB2,TOB1,ACHE,CTH,WFS1,PACSIN3,GOT1,LDLR,LDHD,NR1D1,PFKM,PFKFB4,ALDH5A1,TMEM129,ACADS,SREBF1,PDE4B,WWP2,SCARB1,AXIN2,RNF123,CYP39A1,SORL1,NFE2L1,PLCG2,SMOX,ANKZF1,TOPORS,HADH,EFNA1,GPI,UBA1,PDXP,GLUL,PCCA,ALDH7A1,EPHX2,CCAR2,USP11,ATP6V0E2,UBQLN2,UPF1,RNF150,PRUNE2,OSBPL7,HK2,GPC1,NNT,EIF4G1,ZER1,SLC27A4,WDR6,HSPA1B,ATG9A,HERPUD1,TRPC4AP,USP10,ABL1,CPT1C,ACADSB,AMFR,…
GO:BP	catabolic process	GO:0009056	1.64061e-11	10.785	2665	1660	360	17847	DDB1,RBM38,APP,SH3BP4,HSPA5,DDIT4,ENO2,TRIB2,PFKP,PLCE1,TOB1,ACHE,PLEKHG5,CTH,WFS1,PACSIN3,GOT1,LDLR,LDHD,NR1D1,PFKM,PFKFB4,ALDH5A1,ABHD17C,TMEM129,SYNJ1,ACADS,SREBF1,PDE4B,WWP2,PLCH1,MMP24,SCARB1,AXIN2,RNF123,CYP39A1,EGFR,SORL1,NFE2L1,PLCG2,SMOX,ANKZF1,TOPORS,HADH,EFNA1,GPI,UBA1,PDXP,GLUL,PCCA,ALDH7A1,EPHX2,ENO1,CCAR2,USP11,ATP6V0E2,UBQLN2,UPF1,RNF150,GPD1L,PRUNE2,OSBPL7,HK2,GPC1,NNT,EIF4G1,ZER1…
GO:BP	oxoacid metabolic process	GO:0043436	2.63537e-10	9.57916	1166	1660	185	17847	APP,SCD,DDIT4,ACOT11,SDHA,EGLN3,SLC2A1,ENO2,NDNF,PFKP,FADS2,CTH,GOT1,ALDH1A2,LDHD,NR1D1,PFKM,PFKFB4,ALDH5A1,ACADS,SREBF1,PLOD1,INSIG1,CYP39A1,ACO2,NFE2L1,ADSSL1,B4GAT1,HADH,GPI,GLUL,PCCA,ALDH7A1,EPHX2,XYLT2,ENO1,PDHX,ACSS2,PRUNE2,DARS2,OSBPL7,HK2,MARS,IDH3A,SLC27A4,SLC23A2,PKM,DLAT,CPT1C,ACADSB,ACY1,GOT2,EGLN1,NQO1,HK1,GLS2,POR,SLC2A3,ELOVL5,PGAM1,AP2A1,B3GNT7,NUP58,ST3GAL3,FAAH2,PGK1,HSD17B4,ACA…
GO:BP	organic acid metabolic process	GO:0006082	6.71371e-10	9.17304	1186	1660	186	17847	APP,SCD,DDIT4,ACOT11,SDHA,EGLN3,SLC2A1,ENO2,NDNF,PFKP,FADS2,CTH,GOT1,ALDH1A2,LDHD,NR1D1,PFKM,PFKFB4,ALDH5A1,ACADS,SREBF1,PLOD1,INSIG1,CYP39A1,ACO2,GHR,NFE2L1,ADSSL1,B4GAT1,HADH,GPI,GLUL,PCCA,ALDH7A1,EPHX2,XYLT2,ENO1,PDHX,ACSS2,PRUNE2,DARS2,OSBPL7,HK2,MARS,IDH3A,SLC27A4,SLC23A2,PKM,DLAT,CPT1C,ACADSB,ACY1,GOT2,EGLN1,NQO1,HK1,GLS2,POR,SLC2A3,ELOVL5,PGAM1,AP2A1,B3GNT7,NUP58,ST3GAL3,FAAH2,PGK1,HSD17B4…
GO:BP	carboxylic acid metabolic process	GO:0019752	2.01173e-09	8.69643	1075	1660	171	17847	APP,SCD,DDIT4,ACOT11,SDHA,EGLN3,SLC2A1,ENO2,PFKP,FADS2,CTH,GOT1,ALDH1A2,LDHD,NR1D1,PFKM,PFKFB4,ALDH5A1,ACADS,SREBF1,PLOD1,INSIG1,CYP39A1,ACO2,NFE2L1,ADSSL1,HADH,GPI,GLUL,PCCA,ALDH7A1,EPHX2,ENO1,PDHX,ACSS2,DARS2,OSBPL7,HK2,MARS,IDH3A,SLC27A4,SLC23A2,PKM,DLAT,CPT1C,ACADSB,ACY1,GOT2,EGLN1,NQO1,HK1,GLS2,POR,SLC2A3,ELOVL5,PGAM1,AP2A1,NUP58,FAAH2,PGK1,HSD17B4,ACAD10,SCAP,HAGHL,FAAH,GCLC,SLC37A4,ERO1A,A…
GO:BP	metabolic process	GO:0008152	2.95853e-09	8.52892	11612	1660	1208	17847	PLK5,CA3,DDB1,RBM38,MAPK4,ITM2C,ZDHHC14,APP,COL4A3,AFAP1L2,SH3BP4,HSPA5,SCD,PBXIP1,DDIT4,ADCYAP1R1,ACOT11,PDZRN3,ETNPPL,SDHA,EGLN3,PTPRM,SLC2A1,DEGS2,DNAJC6,ATP1A1,DDR1,PITPNM1,CAMSAP3,ENO2,TRIB2,NDNF,SUCO,MYOC,ALX4,MKRN3,PFKP,ESRRA,SPON1,NR4A1,CPAMD8,SFRP1,RORC,PLCE1,SLC29A1,TGFBR3,DHCR24,FGF7,TOB1,ZNF224,LDLRAP1,EDN3,PIP5K1B,ERBB2,ACHE,CA9,PLEKHG5,FADS2,LAMB1,CTH,ABCG1,NOG,WFS1,MAP3K12,LEMD3,PA…
GO:BP	organic substance catabolic process	GO:1901575	4.53736e-09	8.3432	2216	1660	300	17847	DDB1,RBM38,APP,HSPA5,DDIT4,ENO2,TRIB2,PFKP,PLCE1,TOB1,ACHE,PLEKHG5,CTH,WFS1,PACSIN3,GOT1,LDLR,LDHD,NR1D1,PFKM,PFKFB4,ALDH5A1,ABHD17C,TMEM129,SYNJ1,ACADS,PDE4B,WWP2,PLCH1,SCARB1,AXIN2,RNF123,CYP39A1,EGFR,SORL1,NFE2L1,PLCG2,SMOX,ANKZF1,TOPORS,HADH,EFNA1,GPI,UBA1,PDXP,GLUL,PCCA,ALDH7A1,EPHX2,ENO1,CCAR2,USP11,UBQLN2,UPF1,RNF150,GPD1L,PRUNE2,OSBPL7,HK2,GPC1,EIF4G1,ZER1,SLC27A4,HSPA1B,RAB26,PKM,HERPUD1…
GO:BP	cellular localization	GO:0051641	9.21397e-09	8.03555	2974	1660	380	17847	ZDHHC14,APP,SH3BP4,HSPA5,ADCYAP1R1,DNAJC6,CAMSAP3,FRMPD1,BAIAP3,PLCE1,WLS,SLC29A1,FGF7,MYH10,LDLRAP1,ERBB2,SUN1,SYTL4,VAMP1,ABCG1,NOL3,CX3CL1,SYTL1,LDLR,AHCYL1,NR1D1,DNM2,RBM15B,ABHD17C,TMEM129,SYNJ1,NLGN4Y,ESYT1,SREBF1,SYT11,HOOK1,FAM53C,PLCH1,PEX6,MYO7A,SLC30A1,TUBA4A,AXIN2,REEP2,SORBS1,INSIG1,EGFR,SORL1,MYH9,RAB11FIP5,PLCG2,BBS1,TOPORS,PRKCZ,C2CD2L,ATP1B1,MGARP,PTPRU,GLUL,EPHX2,DYNC1I1,UPF1,PP…
GO:BP	primary metabolic process	GO:0044238	1.34013e-08	7.87285	10527	1660	1108	17847	PLK5,DDB1,RBM38,MAPK4,ITM2C,ZDHHC14,APP,COL4A3,AFAP1L2,HSPA5,SCD,PBXIP1,DDIT4,ADCYAP1R1,ACOT11,PDZRN3,ETNPPL,SDHA,EGLN3,PTPRM,SLC2A1,DEGS2,DNAJC6,ATP1A1,DDR1,PITPNM1,ENO2,TRIB2,NDNF,MYOC,ALX4,MKRN3,PFKP,ESRRA,SPON1,NR4A1,CPAMD8,SFRP1,RORC,PLCE1,SLC29A1,TGFBR3,DHCR24,FGF7,TOB1,ZNF224,LDLRAP1,EDN3,PIP5K1B,ERBB2,ACHE,CA9,PLEKHG5,FADS2,LAMB1,CTH,ABCG1,NOG,WFS1,MAP3K12,LEMD3,PACSIN3,NOL3,ERRFI1,NDRG2,…
GO:BP	oxidation-reduction process	GO:0055114	1.57799e-08	7.8019	1026	1660	162	17847	SCD,SDHA,EGLN3,DEGS2,ENO2,PFKP,DHCR24,FADS2,NDUFS1,ALDH1A2,TRAP1,LDHD,NR1D1,PFKM,ALDH5A1,ACADS,SHPK,WWOX,PLOD1,FAR2,SORBS1,CYP39A1,ACO2,COX4I2,SMOX,MICAL2,HADH,GPI,MYBBP1A,SLC25A25,MICAL3,DHCR7,ALDH7A1,ENO1,ACSS2,GPD1L,HK2,HEPH,NNT,IDH3A,NFATC4,PKM,DLAT,TKT,CPT1C,UQCRC1,ACADSB,BNIP3,NDUFV1,EGLN1,NQO1,HK1,FAXDC2,POR,CYP11A1,UQCRC2,PGAM1,KDM5C,EPM2A,GBE1,PGK1,HSD17B4,ACAD10,CYC1,BDH1,SLC37A4,KDM1A,…
GO:BP	generation of precursor metabolites and energy	GO:0006091	1.00872e-07	6.99623	543	1660	99	17847	APP,DDIT4,SDHA,ENO2,PFKP,NDUFS1,TRAP1,NR1D1,PFKM,PFKFB4,ALDH5A1,SHPK,SORBS1,ACO2,COX4I2,GPI,MYBBP1A,SLC25A25,ENO1,ACSS2,HK2,NNT,IDH3A,NFATC4,PKM,DLAT,TKT,UQCRC1,BNIP3,NDUFV1,NQO1,HK1,POR,UQCRC2,PGAM1,SLC25A4,NUP58,EPM2A,GBE1,PGK1,CYC1,BDH1,SLC37A4,GYS1,ACADVL,VCP,ACSS3,AACS,PYGB,OGDH,G6PD,GAPDH,NDUFS2,SIRT3,NDUFA10,COX20,PDHA1,AK4,ETFB,CS,PFKFB3,TPI1,NDUFB9,OXCT2,ACAT1,DLD,ASPH,ZBTB20,SLC25A23,ID…
GO:BP	organic substance metabolic process	GO:0071704	1.41948e-07	6.84787	11036	1660	1147	17847	PLK5,DDB1,RBM38,MAPK4,ITM2C,ZDHHC14,APP,COL4A3,AFAP1L2,HSPA5,SCD,PBXIP1,DDIT4,ADCYAP1R1,ACOT11,PDZRN3,ETNPPL,SDHA,EGLN3,PTPRM,SLC2A1,DEGS2,DNAJC6,ATP1A1,DDR1,PITPNM1,ENO2,TRIB2,NDNF,MYOC,ALX4,MKRN3,PFKP,ESRRA,SPON1,NR4A1,CPAMD8,SFRP1,RORC,PLCE1,SLC29A1,TGFBR3,DHCR24,FGF7,TOB1,ZNF224,LDLRAP1,EDN3,PIP5K1B,ERBB2,ACHE,CA9,PLEKHG5,FADS2,LAMB1,CTH,ABCG1,NOG,WFS1,MAP3K12,LEMD3,PACSIN3,NOL3,ERRFI1,NDRG2,…
GO:BP	cellular component organization	GO:0016043	2.23786e-07	6.65017	6454	1660	721	17847	PLK5,TMOD1,COL4A6,DDB1,HILPDA,FAM110C,ALCAM,ITM2C,APP,COL4A3,SH3BP4,HSPA5,DDIT4,STC1,COL4A5,PDZRN3,PTPRM,SLC2A1,DNAJC6,LZTS3,DDR1,CAMSAP3,BAIAP3,NDNF,MYOC,CDH23,CRTAC1,FAM73B,PFKP,ESRRA,SFRP1,PHF13,PLCE1,TGFBR3,DHCR24,FGF7,MYH10,LDLRAP1,EDN3,ERBB2,SUN1,ACHE,SYTL4,LAMB1,VAMP1,CTH,ABCG1,NOG,MAP3K12,LEMD3,SLC9A6,PACSIN3,NOL3,NDUFS1,EPHB1,PPP5C,COL4A4,CX3CL1,ALDH1A2,PCDHGC3,CXADR,SULF2,PCDHB13,AQP1,L…
GO:BP	cellular macromolecule localization	GO:0070727	3.05301e-07	6.51527	1956	1660	263	17847	ZDHHC14,SH3BP4,HSPA5,CAMSAP3,FRMPD1,WLS,FGF7,LDLRAP1,ERBB2,SUN1,SYTL4,SYTL1,AHCYL1,DNM2,RBM15B,ABHD17C,TMEM129,SREBF1,SYT11,FAM53C,PEX6,MYO7A,AXIN2,REEP2,SORBS1,INSIG1,EGFR,SORL1,RAB11FIP5,BBS1,TOPORS,PRKCZ,ATP1B1,MGARP,PTPRU,GLUL,EPHX2,UPF1,GPD1L,JUP,NUMA1,HK2,GPC1,ANK1,TMEM88,ATG9A,RAB26,CPSF1,AKAP8L,HERPUD1,MOAP1,PRKCD,CRY2,STXBP1,GPC5,HK1,IFIT1,RANGAP1,MAP1A,ABHD17B,LAMA5,UQCRC2,TGFB1,NFKBIA,…
GO:BP	cellular protein localization	GO:0034613	4.48726e-07	6.34802	1945	1660	261	17847	ZDHHC14,SH3BP4,HSPA5,CAMSAP3,FRMPD1,WLS,FGF7,LDLRAP1,ERBB2,SUN1,SYTL4,SYTL1,AHCYL1,DNM2,RBM15B,ABHD17C,TMEM129,SREBF1,SYT11,FAM53C,PEX6,MYO7A,AXIN2,REEP2,SORBS1,INSIG1,EGFR,SORL1,RAB11FIP5,BBS1,TOPORS,PRKCZ,ATP1B1,MGARP,PTPRU,GLUL,EPHX2,UPF1,GPD1L,JUP,NUMA1,HK2,GPC1,ANK1,TMEM88,ATG9A,RAB26,CPSF1,AKAP8L,HERPUD1,MOAP1,PRKCD,CRY2,STXBP1,GPC5,HK1,IFIT1,RANGAP1,MAP1A,ABHD17B,LAMA5,UQCRC2,TGFB1,NFKBIA,…
GO:BP	lipid metabolic process	GO:0006629	5.01673e-07	6.29958	1409	1660	201	17847	APP,SCD,ACOT11,ETNPPL,DEGS2,ATP1A1,PITPNM1,RORC,PLCE1,DHCR24,LDLRAP1,PIP5K1B,ACHE,FADS2,ABCG1,ALDH1A2,LDLR,CDS1,CHKA,NR1D1,ALDH5A1,SYNJ1,ISYNA1,ESYT1,ACADS,SREBF1,PIK3IP1,PLCH1,WWOX,SCARB1,FAR2,SORBS1,INSIG1,CYP39A1,EGFR,SORL1,MTMR4,NFE2L1,PI4KA,PLCG2,SLC16A11,HADH,DHCR7,PCCA,EPHX2,ACSS2,GPD1L,OSBPL7,GPC1,SLC22A4,SLC27A4,SERINC2,ETNK2,PTDSS1,RORA,CPT1C,NPAS2,ACADSB,PRKCD,PIP4K2C,TEX2,GPC5,PIGL,PT…
GO:BP	response to endogenous stimulus	GO:0009719	7.2202e-07	6.14145	1736	1660	237	17847	COL4A6,CA2,APP,SH3BP4,HSPA5,DDIT4,STC1,ADCYAP1R1,SLC2A1,ATP1A1,ESRRA,NR4A1,SFRP1,RORC,TGFBR3,DHCR24,FGF7,TOB1,ERBB2,CA9,ABCG1,NOG,LEMD3,ERRFI1,GOT1,PPP5C,ALDH1A2,APLP1,SULF2,AQP1,LDLR,AHCYL1,NR1D1,DNM2,PPARGC1B,SREBF1,GRB10,PDE4B,FGFR2,PER1,WWOX,SORBS1,EGFR,SORL1,MTMR4,GHR,PRKAR1A,JUND,PRKCZ,HADH,GPI,KLF10,PDXP,MGARP,PTPRU,ATP6V0E2,CRB2,POLR2A,JUP,NUMA1,GPC1,MARS,ADCY3,PAQR7,GNA14,KAT2A,PKM,NSMF,…
GO:BP	monosaccharide metabolic process	GO:0005996	8.30255e-07	6.08079	297	1660	63	17847	DDB1,SLC2A1,ENO2,PFKP,RORC,GOT1,NR1D1,PFKM,PFKFB4,ALDH5A1,SORBS1,NFE2L1,GPI,ENO1,HK2,NISCH,KAT2A,SLC23A2,PKM,DLAT,TKT,RORA,GOT2,HK1,SLC2A3,PGAM1,CRY1,PGK1,GCLC,MAN2C1,FOXO1,TFAP2B,MIDN,G6PD,GAPDH,WDTC1,SORD,PC,CRTC2,PDHA1,PFKFB3,TPI1,TKFC,MAEA,MAN2A2,ACADM,LRP5,AKR1B1,SLC35A2,PGM1,PER2,PDK1,SLC25A1,GPD2,ABHD10,MDH1,FAM3A,PGM2,PGD,CHST15,G6PC3,GLB1,POFUT1
GO:BP	cellular component organization or biogenesis	GO:0071840	1.02035e-06	5.99125	6636	1660	734	17847	PLK5,TMOD1,COL4A6,DDB1,HILPDA,FAM110C,ALCAM,ITM2C,APP,COL4A3,SH3BP4,HSPA5,DDIT4,STC1,COL4A5,PDZRN3,PTPRM,SLC2A1,DNAJC6,LZTS3,DDR1,CAMSAP3,BAIAP3,NDNF,MYOC,CDH23,CRTAC1,FAM73B,PFKP,ESRRA,SFRP1,PHF13,PLCE1,TGFBR3,DHCR24,FGF7,MYH10,LDLRAP1,EDN3,ERBB2,SUN1,ACHE,SYTL4,LAMB1,VAMP1,CTH,ABCG1,NOG,MAP3K12,LEMD3,SLC9A6,PACSIN3,NOL3,NDUFS1,EPHB1,PPP5C,COL4A4,CX3CL1,ALDH1A2,PCDHGC3,CXADR,SULF2,PCDHB13,AQP1,L…
GO:BP	mitochondrion organization	GO:0007005	1.44792e-06	5.83925	530	1660	94	17847	FAM73B,ESRRA,NOL3,NDUFS1,CXADR,DNM2,DNAJC11,SREBF1,MGARP,CCAR2,HK2,ATG9A,POLRMT,KAT2A,MOAP1,IMMT,BNIP3,NDUFV1,JUN,HSPA1A,UQCRC2,ATG13,SLC25A4,EPM2A,GCLC,ALAS1,NECTIN2,PPRC1,MUL1,VPS11,HSPA4,NDUFS2,SIRT3,NDUFA10,AGK,SPG7,DNAJA3,TOMM20,MTFP1,MFN2,HUWE1,COX20,RNF31,HSPD1,MIPEP,NDUFB9,VDAC1,PITRM1,TP53BP2,PIM2,SCO1,MTM1,SLC9A1,BNIP3L,BAP1,AFG3L2,NDUFAF5,MGME1,NPEPPS,PINK1,DNM1,TFDP1,EPAS1,TIMM23B,ATP…
GO:BP	monosaccharide biosynthetic process	GO:0046364	1.73144e-06	5.76159	99	1660	31	17847	DDB1,ENO2,GOT1,NR1D1,GPI,ENO1,KAT2A,TKT,GOT2,PGAM1,CRY1,PGK1,FOXO1,G6PD,GAPDH,SORD,PC,CRTC2,TPI1,MAEA,ACADM,AKR1B1,PGM1,PER2,SLC25A1,GPD2,MDH1,FAM3A,PGD,CHST15,G6PC3
GO:BP	hexose metabolic process	GO:0019318	1.76692e-06	5.75278	254	1660	56	17847	DDB1,ENO2,PFKP,RORC,GOT1,NR1D1,PFKM,PFKFB4,ALDH5A1,SORBS1,NFE2L1,GPI,ENO1,HK2,NISCH,KAT2A,PKM,DLAT,RORA,GOT2,HK1,PGAM1,CRY1,PGK1,MAN2C1,FOXO1,TFAP2B,MIDN,G6PD,GAPDH,WDTC1,SORD,PC,CRTC2,PDHA1,PFKFB3,TPI1,TKFC,MAEA,MAN2A2,ACADM,LRP5,AKR1B1,SLC35A2,PGM1,PER2,PDK1,SLC25A1,GPD2,MDH1,FAM3A,PGM2,CHST15,G6PC3,GLB1,POFUT1
GO:BP	organic substance biosynthetic process	GO:1901576	3.02747e-06	5.51892	6193	1660	688	17847	DDB1,ITM2C,ZDHHC14,APP,AFAP1L2,HSPA5,SCD,PBXIP1,ADCYAP1R1,ETNPPL,EGLN3,SLC2A1,DEGS2,ATP1A1,PITPNM1,ENO2,TRIB2,ALX4,ESRRA,NR4A1,SFRP1,RORC,PLCE1,TGFBR3,DHCR24,FGF7,TOB1,ZNF224,PIP5K1B,ERBB2,ACHE,CA9,FADS2,CTH,ABCG1,NOG,WFS1,MAP3K12,LEMD3,ERRFI1,GOT1,PPP5C,CX3CL1,ALDH1A2,LDLR,TRAP1,CDS1,CHKA,NR1D1,PFKM,DNM2,GRB7,ABHD17C,SYNJ1,PPARGC1B,TSPYL2,ISYNA1,SREBF1,SETD3,PDE4B,FGFR2,RIPK4,WWP2,PLCH1,PER1,WWO…
GO:BP	small molecule biosynthetic process	GO:0044283	3.16156e-06	5.5001	721	1660	117	17847	DDB1,SCD,ADCYAP1R1,ENO2,PLCE1,DHCR24,FADS2,CTH,ABCG1,GOT1,ALDH1A2,NR1D1,ISYNA1,SREBF1,PDE4B,PLCH1,PLOD1,INSIG1,CYP39A1,PLCG2,GPI,ITPKB,DHCR7,GLUL,EPHX2,ENO1,ACSS2,OSBPL7,KAT2A,PKM,TKT,GOT2,GLS2,POR,ELOVL5,PGAM1,CRY1,AP2A1,NUDT4,PLCD3,PGK1,HSD17B4,SCAP,IP6K1,BDH1,PLCD4,ACADVL,VCP,NEIL1,FOXO1,ACSS3,ALDH18A1,AACS,NAGS,G6PD,GAPDH,WDTC1,FASN,PCCB,SORD,PC,MBTPS2,CRTC2,HYAL1,GLS,TPI1,CLCN2,UCKL1,WNT4,MA…
GO:BP	response to abiotic stimulus	GO:0009628	4.62893e-06	5.33452	1243	1660	178	17847	DDB1,HILPDA,CA2,APP,HSPA5,DDIT4,STC1,ACOT11,EGLN3,SLC2A1,ATP1A1,PITPNM1,NDNF,SFRP1,TGFBR3,SUN1,CA9,NOL3,ERRFI1,GOT1,EPHB1,BDKRB2,AQP1,CDS1,DNM2,PER1,MMP24,PLOD1,COX4I2,EGFR,NFE2L1,RAB11FIP5,JUND,ADSSL1,GPI,ATP1B1,MGARP,ENO1,CCAR2,POLR2A,JUP,HK2,HSPA1B,HYOU1,ACTR5,NFATC4,PKM,NSMF,RORA,DUSP1,BNIP3,BHLHE40,ERCC2,SLC12A4,CRY2,EGLN1,NQO1,JUN,INTS3,AEN,MSH6,HSPA1A,TGFB1,CRY1,NFKBIA,HSPA9,NOLC1,STC2,SLC…
GO:BP	biosynthetic process	GO:0009058	5.48522e-06	5.26081	6295	1660	696	17847	DDB1,ITM2C,ZDHHC14,APP,AFAP1L2,HSPA5,SCD,PBXIP1,ADCYAP1R1,ETNPPL,EGLN3,SLC2A1,DEGS2,ATP1A1,PITPNM1,ENO2,TRIB2,SUCO,ALX4,ESRRA,NR4A1,SFRP1,RORC,PLCE1,TGFBR3,DHCR24,FGF7,TOB1,ZNF224,PIP5K1B,ERBB2,ACHE,CA9,FADS2,CTH,ABCG1,NOG,WFS1,MAP3K12,LEMD3,ERRFI1,GOT1,PPP5C,CX3CL1,ALDH1A2,LDLR,TRAP1,CDS1,CHKA,NR1D1,PFKM,DNM2,GRB7,ABHD17C,SYNJ1,PPARGC1B,TSPYL2,ISYNA1,SREBF1,SETD3,PDE4B,FGFR2,RIPK4,WWP2,PLCH1,PER…
GO:BP	small molecule catabolic process	GO:0044282	6.00269e-06	5.22165	444	1660	81	17847	ENO2,PFKP,CTH,GOT1,LDHD,PFKM,ALDH5A1,SYNJ1,ACADS,SCARB1,CYP39A1,HADH,GPI,PDXP,GLUL,PCCA,ALDH7A1,ENO1,HK2,SLC27A4,PKM,CPT1C,ACADSB,GOT2,HK1,GLS2,PGAM1,PGK1,HSD17B4,ACAD10,HAGHL,FAAH,BDH1,ACADVL,AUH,MCCC1,OGDH,GAPDH,BCKDHA,PCCB,SORD,IVD,ECHDC2,HYAL1,ETFB,GLS,TPI1,TKFC,OXCT2,PCYOX1,ACAT1,DLD,SLC9A1,HADHB,ECI1,HIBADH,QDPR,ACADM,SLC25A17,AHCY,LRP5,LPIN1,PGM1,HIBCH,ALDH2,ABCD3,GLUD1,TMEM2,ETFDH,CRAT,GP…
GO:BP	organonitrogen compound metabolic process	GO:1901564	9.21547e-06	5.03548	6854	1660	748	17847	PLK5,DDB1,MAPK4,ITM2C,ZDHHC14,APP,COL4A3,AFAP1L2,HSPA5,SCD,DDIT4,ACOT11,PDZRN3,EGLN3,PTPRM,DEGS2,DNAJC6,DDR1,ENO2,TRIB2,NDNF,MYOC,MKRN3,PFKP,SPON1,NR4A1,CPAMD8,SFRP1,PLCE1,TGFBR3,DHCR24,FGF7,TOB1,LDLRAP1,EDN3,ERBB2,ACHE,PLEKHG5,LAMB1,CTH,ABCG1,NOG,WFS1,MAP3K12,PACSIN3,NOL3,ERRFI1,NDRG2,GOT1,EPHB1,PPP5C,BDKRB2,CX3CL1,SULF2,AQP1,LDLR,TRAP1,CDK18,NEDD9,CDS1,CHKA,AHCYL1,NR1D1,PFKM,PFKFB4,ALDH5A1,GRB7…
GO:BP	response to organic substance	GO:0010033	1.40966e-05	4.85089	3388	1660	405	17847	PLK5,CA3,COL4A6,CA2,MAPK4,APP,COL4A3,SH3BP4,HSPA5,SCD,DDIT4,STC1,ADCYAP1R1,SLC2A1,ATP1A1,IL20RA,BAIAP3,PFKP,ESRRA,NR4A1,SFRP1,RORC,TGFBR3,DHCR24,FGF7,TOB1,LDLRAP1,ERBB2,CA9,CTH,ABCG1,NOG,WFS1,LEMD3,SLC9A6,NOL3,ERRFI1,GOT1,PPP5C,CX3CL1,ALDH1A2,APLP1,SULF2,AQP1,LDLR,CHKA,AHCYL1,NR1D1,DNM2,TMEM129,SYNJ1,PPARGC1B,TSPYL2,SREBF1,GRB10,SHPK,PDE4B,FGFR2,PER1,WWOX,SCARB1,SORBS1,HOMER2,INSIG1,EGFR,SORL1,MT…
GO:BP	organelle organization	GO:0006996	1.44688e-05	4.83957	3920	1660	459	17847	TMOD1,DDB1,HILPDA,CAMSAP3,BAIAP3,MYOC,FAM73B,ESRRA,SFRP1,PHF13,PLCE1,FGF7,MYH10,EDN3,SUN1,VAMP1,MAP3K12,LEMD3,PACSIN3,NOL3,NDUFS1,PPP5C,CX3CL1,CXADR,AQP1,NEDD9,TSPYL4,RASSF7,DNM2,GRB7,SYNJ1,PPARGC1B,TSPYL2,DNAJC11,DHX30,SREBF1,SYT11,SETD3,HOOK1,CEP85,PER1,PEX6,MYO7A,TUBA4A,AXIN2,REEP2,SORBS1,INSIG1,PRKAR1A,NFE2L1,MYH9,REC8,BBS1,GFM2,MICAL2,PRKCZ,PDXP,MGARP,MICAL3,EPHX2,ING1,KRT15,ASAP3,CCAR2,ATP6…
GO:BP	organophosphate metabolic process	GO:0019637	1.58655e-05	4.79955	1045	1660	153	17847	APP,SCD,DDIT4,ADCYAP1R1,ACOT11,ETNPPL,PITPNM1,ENO2,PFKP,PLCE1,PIP5K1B,ACHE,LDLR,CDS1,CHKA,PFKM,PFKFB4,ALDH5A1,SYNJ1,ISYNA1,SHPK,PIK3IP1,PDE4B,PLCH1,SCARB1,FAR2,MTMR4,DCAKD,NFE2L1,PI4KA,PLCG2,ADSSL1,GPI,MPP1,ITPKB,PDXP,PANK4,ENO1,PDHX,ACSS2,GPD1L,HK2,ADCY3,SERINC2,ETNK2,PKM,DLAT,TKT,PTDSS1,RORA,PRKCD,PIP4K2C,HK1,PIGL,ELOVL5,PGAM1,PRPSAP1,PIGG,PANK1,PDGFRB,NUDT4,ITPK1,NUP58,PLCD3,CAPN2,PGK1,HSD17B4…
GO:BP	alcohol metabolic process	GO:0006066	1.98408e-05	4.70244	372	1660	70	17847	APP,SCD,ADCYAP1R1,DEGS2,PLCE1,DHCR24,LDLRAP1,ABCG1,GOT1,ALDH1A2,LDLR,CHKA,SYNJ1,ISYNA1,SREBF1,PLCH1,SCARB1,INSIG1,CYP39A1,ACO2,NFE2L1,PLCG2,ITPKB,DHCR7,EPHX2,ACSS2,IDH3A,POR,CYP11A1,NUDT4,ITPK1,PLCD3,LMF1,SCAP,IP6K1,PLCD4,INPP4B,ACADVL,G6PD,FASN,SORD,PNPLA4,MBTPS2,TPI1,CLCN2,TKFC,WNT4,RDH13,SPTLC1,IDH3B,QDPR,MSMO1,SQLE,HMGCR,IP6K2,AKR1B1,FGFR1,ALDH2,CYP51A1,GPER1,GPD2,SREBF2,NFKB1,NPC1,SEC14L2,HM…
GO:BP	energy derivation by oxidation of organic compounds	GO:0015980	2.7304e-05	4.56377	287	1660	58	17847	SDHA,NDUFS1,TRAP1,NR1D1,PFKM,ALDH5A1,SORBS1,ACO2,COX4I2,MYBBP1A,SLC25A25,NNT,IDH3A,NFATC4,DLAT,UQCRC1,BNIP3,NDUFV1,UQCRC2,EPM2A,GBE1,CYC1,SLC37A4,GYS1,ACADVL,VCP,PYGB,OGDH,NDUFS2,SIRT3,NDUFA10,COX20,PDHA1,ETFB,CS,NDUFB9,DLD,SLC25A23,IDH3B,GNAS,ACADM,PINK1,PGM1,SUCLG1,SUCLA2,PER2,ETFDH,MTFR1L,FH,GPD2,MDH1,PGM2,NDUFS3,COQ10A,NDUFS7,PPP1R2,SUCLG2,SURF1
GO:BP	organic acid catabolic process	GO:0016054	2.80986e-05	4.55131	273	1660	56	17847	CTH,GOT1,LDHD,ALDH5A1,ACADS,CYP39A1,HADH,GLUL,PCCA,ALDH7A1,SLC27A4,CPT1C,ACADSB,GOT2,GLS2,HSD17B4,ACAD10,FAAH,ACADVL,AUH,MCCC1,OGDH,BCKDHA,PCCB,SORD,IVD,ECHDC2,HYAL1,ETFB,GLS,PCYOX1,ACAT1,DLD,SLC9A1,HADHB,ECI1,HIBADH,QDPR,ACADM,SLC25A17,AHCY,LPIN1,HIBCH,ABCD3,GLUD1,TMEM2,ETFDH,CRAT,ABHD10,MUT,CEMIP,PGD,TXN2,ACOX2,HADHA,ACAD8
GO:BP	carboxylic acid catabolic process	GO:0046395	2.80986e-05	4.55131	273	1660	56	17847	CTH,GOT1,LDHD,ALDH5A1,ACADS,CYP39A1,HADH,GLUL,PCCA,ALDH7A1,SLC27A4,CPT1C,ACADSB,GOT2,GLS2,HSD17B4,ACAD10,FAAH,ACADVL,AUH,MCCC1,OGDH,BCKDHA,PCCB,SORD,IVD,ECHDC2,HYAL1,ETFB,GLS,PCYOX1,ACAT1,DLD,SLC9A1,HADHB,ECI1,HIBADH,QDPR,ACADM,SLC25A17,AHCY,LPIN1,HIBCH,ABCD3,GLUD1,TMEM2,ETFDH,CRAT,ABHD10,MUT,CEMIP,PGD,TXN2,ACOX2,HADHA,ACAD8
GO:BP	hexose biosynthetic process	GO:0019319	3.04067e-05	4.51703	93	1660	28	17847	DDB1,ENO2,GOT1,NR1D1,GPI,ENO1,KAT2A,GOT2,PGAM1,CRY1,PGK1,FOXO1,GAPDH,SORD,PC,CRTC2,TPI1,MAEA,ACADM,AKR1B1,PGM1,PER2,SLC25A1,GPD2,MDH1,FAM3A,CHST15,G6PC3
GO:BP	response to hormone	GO:0009725	3.91093e-05	4.40772	1007	1660	147	17847	CA2,DDIT4,STC1,ADCYAP1R1,SLC2A1,ATP1A1,ESRRA,NR4A1,SFRP1,RORC,TGFBR3,DHCR24,CA9,ABCG1,ERRFI1,GOT1,PPP5C,ALDH1A2,AQP1,AHCYL1,NR1D1,PPARGC1B,SREBF1,GRB10,PER1,SORBS1,EGFR,SORL1,GHR,PRKAR1A,JUND,PRKCZ,HADH,GPI,MGARP,PTPRU,ATP6V0E2,MARS,ADCY3,PAQR7,PKM,NSMF,RORA,ABCA3,DUSP1,PRKCD,CRY2,GOT2,NQO1,STXBP1,JUN,HDAC5,RERG,RANGAP1,POR,PRCP,CYP11A1,TGFB1,CRY1,SNRPN,TRIM68,STC2,PDGFRB,TBC1D4,PTPRA,ATP6V0A1,IC…
GO:BP	establishment of localization in cell	GO:0051649	4.06433e-05	4.39101	2271	1660	286	17847	ZDHHC14,APP,HSPA5,ADCYAP1R1,DNAJC6,CAMSAP3,BAIAP3,PLCE1,WLS,SLC29A1,MYH10,LDLRAP1,ERBB2,SUN1,SYTL4,VAMP1,ABCG1,NOL3,CX3CL1,SYTL1,LDLR,AHCYL1,NR1D1,DNM2,RBM15B,TMEM129,SYNJ1,NLGN4Y,SREBF1,SYT11,HOOK1,FAM53C,PLCH1,PEX6,MYO7A,SLC30A1,REEP2,INSIG1,SORL1,MYH9,RAB11FIP5,PLCG2,PRKCZ,C2CD2L,ATP1B1,MGARP,EPHX2,DYNC1I1,UPF1,PPFIA3,JUP,NUMA1,JPH4,ANK1,HYOU1,RAB26,CPSF1,MREG,AKAP8L,HERPUD1,MOAP1,ABL1,NRXN3,P…
GO:BP	response to nitrogen compound	GO:1901698	4.91038e-05	4.30889	1150	1660	163	17847	COL4A6,CA2,APP,SH3BP4,HSPA5,STC1,SLC2A1,ESRRA,NR4A1,SFRP1,TGFBR3,WFS1,ERRFI1,GOT1,PPP5C,APLP1,AQP1,LDLR,AHCYL1,DNM2,TMEM129,PPARGC1B,SREBF1,GRB10,PDE4B,PER1,SORBS1,HOMER2,EGFR,SORL1,GHR,PRKAR1A,JUND,ANKZF1,PRKCZ,HADH,GPI,KLF10,PDXP,MGARP,ATP6V0E2,UBQLN2,JUP,MARS,ADCY3,GNA14,EFTUD2,PKM,HERPUD1,NSMF,ABL1,DUSP1,UQCRC1,SLC3A2,AMFR,PRKCD,CRY2,GOT2,EGLN1,NQO1,JUN,HDAC5,IFIT1,RANGAP1,POR,CYP11A1,FBXO44,…
GO:BP	carbohydrate metabolic process	GO:0005975	5.44382e-05	4.2641	633	1660	102	17847	DDB1,APP,DDIT4,ADCYAP1R1,SLC2A1,ENO2,PFKP,RORC,GOT1,NR1D1,PFKM,PFKFB4,ALDH5A1,SYNJ1,ISYNA1,SHPK,SIAE,SORBS1,NFE2L1,GPI,ENO1,POMT1,GPD1L,HK2,IDH3A,NISCH,KAT2A,SLC23A2,PKM,DLAT,TKT,RORA,AMY2B,SLC3A2,CHST10,GOT2,HK1,SLC2A3,PGAM1,CRY1,AP2A1,B3GNT7,ITPK1,NUP58,EPM2A,GBE1,PGK1,GCLC,SLC37A4,GYS1,MAN2C1,FOXO1,TFAP2B,PYGB,OGDH,GANAB,MIDN,G6PD,GAPDH,WDTC1,B3GNT2,SORD,PC,CRTC2,HYAL1,PDHA1,CS,PFKFB3,TPI1,TKF…
GO:BP	cellular response to endogenous stimulus	GO:0071495	5.83766e-05	4.23376	1465	1660	198	17847	COL4A6,CA2,APP,SH3BP4,HSPA5,DDIT4,STC1,ATP1A1,ESRRA,NR4A1,SFRP1,RORC,TGFBR3,FGF7,TOB1,ERBB2,NOG,LEMD3,ERRFI1,GOT1,PPP5C,APLP1,SULF2,AQP1,AHCYL1,NR1D1,DNM2,PPARGC1B,SREBF1,GRB10,PDE4B,FGFR2,PER1,WWOX,SORBS1,EGFR,SORL1,MTMR4,GHR,PRKAR1A,JUND,PRKCZ,KLF10,PDXP,MGARP,ATP6V0E2,CRB2,POLR2A,JUP,NUMA1,GPC1,MARS,ADCY3,PAQR7,GNA14,KAT2A,PKM,NSMF,RORA,ABL1,DUSP1,PRKCD,KIDINS220,CRY2,HES1,JUN,HDAC5,RANGAP1,PO…
GO:BP	NADH metabolic process	GO:0006734	6.02827e-05	4.21981	44	1660	18	17847	ENO2,PFKP,PFKM,GPI,ENO1,GPD1L,HK2,PKM,HK1,PGAM1,PGK1,VCP,OGDH,GAPDH,TPI1,IDH3B,GPD2,MDH1
GO:BP	regulation of catabolic process	GO:0009894	6.6877e-05	4.17472	998	1660	145	17847	DDB1,RBM38,APP,SH3BP4,DDIT4,TRIB2,TOB1,PLEKHG5,PACSIN3,LDLR,PFKFB4,SREBF1,WWP2,SCARB1,AXIN2,EGFR,SORL1,NFE2L1,EFNA1,CCAR2,ATP6V0E2,UBQLN2,UPF1,OSBPL7,HK2,NNT,EIF4G1,ZER1,WDR6,HSPA1B,RAB26,HERPUD1,USP10,ABL1,FZR1,BNIP3,PRKCD,PIP4K2C,MYLIP,MAP1A,HSPA1A,PGAM1,ATG13,NUP58,SMAD7,EPM2A,TBC1D12,CUL4B,ATP6V0A1,TBRG4,PNPLA2,GCLC,ITPR1,LRIG2,VCP,TPCN1,FOXO1,MUL1,VPS11,GAPDH,HNRNPU,EXOC7,CNOT8,SNX33,PUM1,FX…
GO:BP	macromolecule localization	GO:0033036	7.43331e-05	4.12882	3228	1660	384	17847	HILPDA,ZDHHC14,SH3BP4,HSPA5,SLC2A1,PITPNM1,CAMSAP3,FRMPD1,BAIAP3,SFRP1,WLS,DHCR24,FGF7,MYH10,LDLRAP1,ERBB2,SUN1,ACHE,SYTL4,ABCG1,BDKRB2,CX3CL1,SYTL1,LDLR,CHKA,AHCYL1,NR1D1,PFKM,DNM2,RBM15B,ABHD17C,TMEM129,ESYT1,OSBP2,SREBF1,SYT11,HOOK1,FAM53C,WWP2,PEX6,SCARB1,MYO7A,AXIN2,REEP2,SORBS1,INSIG1,EGFR,SORL1,MYH9,RAB11FIP5,BBS1,TOPORS,PRKCZ,HADH,C2CD2L,GPI,RAB11FIP1,ATP1B1,MGARP,PTPRU,GLUL,EPHX2,ATP6V0E…
GO:BP	glucose metabolic process	GO:0006006	8.29833e-05	4.08101	211	1660	46	17847	DDB1,ENO2,PFKP,RORC,GOT1,NR1D1,PFKM,ALDH5A1,SORBS1,NFE2L1,GPI,ENO1,HK2,NISCH,KAT2A,PKM,DLAT,RORA,GOT2,HK1,PGAM1,CRY1,PGK1,FOXO1,TFAP2B,MIDN,G6PD,GAPDH,WDTC1,SORD,PC,CRTC2,PDHA1,TPI1,MAEA,ACADM,LRP5,PGM1,PER2,PDK1,SLC25A1,GPD2,MDH1,FAM3A,PGM2,G6PC3
GO:BP	cellular respiration	GO:0045333	8.65377e-05	4.06279	191	1660	43	17847	SDHA,NDUFS1,TRAP1,ALDH5A1,ACO2,COX4I2,MYBBP1A,SLC25A25,NNT,IDH3A,NFATC4,DLAT,UQCRC1,BNIP3,NDUFV1,UQCRC2,CYC1,VCP,OGDH,NDUFS2,SIRT3,NDUFA10,COX20,PDHA1,ETFB,CS,NDUFB9,DLD,SLC25A23,IDH3B,PINK1,SUCLG1,SUCLA2,ETFDH,MTFR1L,FH,GPD2,MDH1,NDUFS3,COQ10A,NDUFS7,SUCLG2,SURF1
GO:BP	organic substance transport	GO:0071702	9.04702e-05	4.04349	2893	1660	349	17847	CA3,SLCO4A1,CA2,ZDHHC14,HSPA5,CA12,SLC2A1,PITPNM1,CAMSAP3,BAIAP3,SLC4A3,SFRP1,WLS,SLC29A1,MYH10,LDLRAP1,EDN3,ERBB2,ACHE,CA9,SYTL4,ABCG1,BDKRB2,CX3CL1,SYTL1,AQP1,LDLR,SLC4A4,CHKA,AHCYL1,SLC35F3,NR1D1,PFKM,DNM2,RBM15B,TMEM129,ESYT1,OSBP2,SREBF1,SYT11,GRB10,SLC4A2,HOOK1,FAM53C,WWP2,PEX6,SCARB1,MYO7A,REEP2,SORBS1,INSIG1,EGFR,SORL1,NFE2L1,MYH9,RAB11FIP5,BBS1,SLC16A11,SLC16A12,SEC14L1,PRKCZ,HADH,C2CD2L…
GO:BP	intracellular transport	GO:0046907	0.000100649	3.99719	1759	1660	229	17847	ZDHHC14,APP,HSPA5,CAMSAP3,BAIAP3,WLS,MYH10,LDLRAP1,ERBB2,SUN1,SYTL4,ABCG1,SYTL1,LDLR,AHCYL1,RBM15B,TMEM129,SREBF1,HOOK1,FAM53C,PEX6,MYO7A,REEP2,INSIG1,SORL1,PRKCZ,ATP1B1,MGARP,EPHX2,DYNC1I1,UPF1,JUP,NUMA1,ANK1,HYOU1,RAB26,CPSF1,MREG,AKAP8L,HERPUD1,PRKCD,CRY2,MAP2K1,STXBP1,BET1L,IFIT1,NTN1,RANGAP1,MAP1A,UQCRC2,TNNC1,TGFB1,NFKBIA,AP3D1,ATG13,HSPA9,EHD4,AP2A1,NOLC1,SGSM2,NUP58,CCHCR1,TBC1D4,EPM2A,TB…
GO:BP	monocarboxylic acid metabolic process	GO:0032787	0.000100859	3.99629	657	1660	104	17847	APP,SCD,DDIT4,ACOT11,ENO2,PFKP,FADS2,ALDH1A2,LDHD,NR1D1,PFKM,PFKFB4,ALDH5A1,ACADS,SREBF1,INSIG1,CYP39A1,NFE2L1,HADH,GPI,PCCA,EPHX2,ENO1,PDHX,ACSS2,OSBPL7,HK2,SLC27A4,PKM,DLAT,CPT1C,ACADSB,GOT2,HK1,POR,ELOVL5,PGAM1,NUP58,FAAH2,PGK1,HSD17B4,ACAD10,SCAP,HAGHL,FAAH,SLC37A4,ACADVL,AACS,AUH,MCCC1,OGDH,GAPDH,WDTC1,FASN,PCCB,SLC16A3,SORD,IVD,PC,ECHDC2,CKMT1B,GSTM2,PDHA1,ETFB,PFKFB3,TPI1,VDAC1,ACAT1,DLD,G…
GO:BP	protein localization	GO:0008104	0.00012561	3.90097	2863	1660	345	17847	ZDHHC14,SH3BP4,HSPA5,SLC2A1,PITPNM1,CAMSAP3,FRMPD1,BAIAP3,SFRP1,WLS,DHCR24,FGF7,MYH10,LDLRAP1,ERBB2,SUN1,ACHE,SYTL4,ABCG1,CX3CL1,SYTL1,AHCYL1,NR1D1,PFKM,DNM2,RBM15B,ABHD17C,TMEM129,SREBF1,SYT11,HOOK1,FAM53C,WWP2,PEX6,MYO7A,AXIN2,REEP2,SORBS1,INSIG1,EGFR,SORL1,MYH9,RAB11FIP5,BBS1,TOPORS,PRKCZ,HADH,C2CD2L,GPI,RAB11FIP1,ATP1B1,MGARP,PTPRU,GLUL,EPHX2,ATP6V0E2,UPF1,GPD1L,JUP,NUMA1,HK2,GPC1,ANK1,TMEM88…
GO:BP	carbohydrate derivative metabolic process	GO:1901135	0.000135335	3.86859	1123	1660	158	17847	ITM2C,APP,SCD,DDIT4,ACOT11,ENO2,NDNF,PFKP,SULF2,PFKM,PFKFB4,ALDH5A1,ESYT1,SHPK,PDE4B,FAR2,PXYLP1,MAN1A1,DCAKD,NFE2L1,ADSSL1,B4GAT1,GPI,MPP1,PANK4,PRKCSH,XYLT2,ENO1,POMT1,PDHX,ACSS2,GPD1L,HK2,GPC1,ADCY3,PKM,DLAT,TKT,RORA,AMFR,CHST10,PRKCD,GPC5,HK1,PIGL,CERK,ELOVL5,FBXO44,PGAM1,PRPSAP1,AP2A1,PIGG,PANK1,POMGNT1,PDGFRB,NUDT4,B3GNT7,NUP58,ST3GAL3,LMF1,PGK1,GALNT18,HSD17B4,CYC1,ASGR1,DPY19L1,CHPF,ADCY7…
GO:BP	cellular response to stress	GO:0033554	0.000138576	3.85831	2064	1660	261	17847	DDB1,HILPDA,CA2,APP,HSPA5,DDIT4,STC1,EGLN3,SLC2A1,NDNF,SFRP1,CA9,CTH,WFS1,MAP3K12,NOL3,ERRFI1,EPHB1,PPP5C,BDKRB2,EEPD1,AQP1,TRAP1,DNM2,TMEM129,PPARGC1B,TSPYL2,SREBF1,PER1,AXIN2,INSIG1,COX4I2,EGFR,NFE2L1,REC8,NFRKB,ANKZF1,TOPORS,LANCL1,MYBBP1A,UBA1,KLF10,MGARP,TBX2,GLUL,ENO1,CCAR2,UBQLN2,UPF1,POLR2A,HK2,EIF4G1,ATMIN,MARS,HSPA1B,HYOU1,ACTR5,NFATC4,HERPUD1,MAP3K6,MOAP1,USP10,RORA,ABL1,DUSP1,NPAS2,AM…
GO:BP	regulation of cellular catabolic process	GO:0031329	0.0001459	3.83595	838	1660	125	17847	RBM38,APP,SH3BP4,TRIB2,TOB1,PACSIN3,LDLR,PFKFB4,SREBF1,SCARB1,AXIN2,SORL1,NFE2L1,EFNA1,CCAR2,ATP6V0E2,UBQLN2,UPF1,OSBPL7,HK2,NNT,EIF4G1,ZER1,WDR6,HSPA1B,HERPUD1,USP10,ABL1,BNIP3,PRKCD,PIP4K2C,MYLIP,MAP1A,HSPA1A,PGAM1,ATG13,SMAD7,EPM2A,TBC1D12,ATP6V0A1,TBRG4,PNPLA2,GCLC,ITPR1,LRIG2,VCP,TPCN1,FOXO1,MUL1,VPS11,GAPDH,HNRNPU,EXOC7,CNOT8,SNX33,PUM1,FXR2,MFN2,RNF40,SNRNP70,PIK3R2,RPTOR,PSAP,BAG5,HMOX1,N…
GO:BP	homeostatic process	GO:0042592	0.000181476	3.74118	1939	1660	247	17847	SCNN1A,DDB1,CA2,APP,SCD,STC1,ADCYAP1R1,ACOT11,CA12,ATP1A1,IL20RA,BAIAP3,MYOC,CDH23,SLC4A3,PLCE1,TGFBR3,LDLRAP1,EDN3,ACHE,SLC9A7,ABCG1,WFS1,SLC9A6,NOL3,GOT1,BDKRB2,CX3CL1,CXADR,AQP1,LDLR,SLC4A4,NR1D1,PFKM,PPARGC1B,TXNDC11,GRB10,SLC4A2,PDE4B,PLCH1,ANXA6,SCARB1,SLC30A1,HOMER2,INSIG1,CYP39A1,EGFR,ATP1B2,PRKAR1A,NFE2L1,RAB11FIP5,SLC22A17,PLCG2,BBS1,HADH,C2CD2L,GPI,ITPKB,ATP1B1,EPHX2,TNS2,ATP6V0E2,SLC3…
GO:BP	response to oxygen-containing compound	GO:1901700	0.000208353	3.6812	1719	1660	223	17847	CA3,COL4A6,CA2,APP,COL4A3,SH3BP4,HSPA5,SCD,DDIT4,STC1,ADCYAP1R1,SLC2A1,ATP1A1,BAIAP3,ESRRA,NR4A1,SFRP1,RORC,TGFBR3,CA9,ERRFI1,GOT1,PPP5C,CX3CL1,ALDH1A2,APLP1,AQP1,LDLR,TRAP1,AHCYL1,NR1D1,DNM2,SYNJ1,PPARGC1B,SREBF1,GRB10,SHPK,PDE4B,FGFR2,PER1,SCARB1,SORBS1,HOMER2,INSIG1,EGFR,SORL1,GHR,PRKAR1A,NFE2L1,RAB11FIP5,PLCG2,JUND,ANKZF1,PRKCZ,HADH,C2CD2L,GPI,KLF10,PDXP,MGARP,GLUL,ATP6V0E2,UPF1,OSBPL7,JUP,MA…
GO:BP	response to unfolded protein	GO:0006986	0.000230658	3.63703	177	1660	40	17847	HSPA5,CTH,WFS1,TMEM129,TSPYL2,HSPA1B,HYOU1,HERPUD1,AMFR,HSPA1A,HSPA9,STC2,SRPRA,ERO1A,ACADVL,VCP,DNAJB9,PPP1R15B,HSPA4L,KDELR3,HSPA4,MBTPS2,MFN2,HSPD1,HERPUD2,DNAJB1,FAF2,CDK5RAP3,SHC1,STT3B,BAK1,CUL7,NCK2,EIF2AK3,PIK3R1,CANX,TMBIM6,ASNS,HSP90B1,HDGF
GO:BP	carbohydrate biosynthetic process	GO:0016051	0.000309649	3.50913	213	1660	45	17847	DDB1,ADCYAP1R1,SLC2A1,ENO2,GOT1,NR1D1,ISYNA1,SORBS1,GPI,ENO1,KAT2A,TKT,CHST10,GOT2,PGAM1,CRY1,AP2A1,B3GNT7,EPM2A,GBE1,PGK1,GYS1,FOXO1,G6PD,GAPDH,B3GNT2,SORD,PC,CRTC2,TPI1,MAEA,ACADM,AKR1B1,PGM1,PER2,SLC25A1,GPER1,GPD2,MDH1,FAM3A,NFKB1,PGM2,PGD,CHST15,G6PC3
GO:BP	response to organonitrogen compound	GO:0010243	0.000317583	3.49814	1067	1660	150	17847	COL4A6,CA2,APP,SH3BP4,HSPA5,STC1,SLC2A1,ESRRA,NR4A1,SFRP1,TGFBR3,WFS1,ERRFI1,GOT1,PPP5C,APLP1,AQP1,LDLR,AHCYL1,DNM2,TMEM129,PPARGC1B,SREBF1,GRB10,PDE4B,PER1,SORBS1,HOMER2,EGFR,SORL1,GHR,PRKAR1A,JUND,ANKZF1,PRKCZ,HADH,GPI,KLF10,PDXP,MGARP,ATP6V0E2,UBQLN2,JUP,MARS,ADCY3,GNA14,EFTUD2,PKM,HERPUD1,NSMF,ABL1,DUSP1,UQCRC1,AMFR,PRKCD,CRY2,GOT2,JUN,HDAC5,RANGAP1,POR,CYP11A1,FBXO44,RAPGEF1,TGFB1,CRY1,NFKBI…
GO:BP	organonitrogen compound catabolic process	GO:1901565	0.000360431	3.44318	1319	1660	178	17847	DDB1,HSPA5,TRIB2,PLEKHG5,CTH,WFS1,PACSIN3,GOT1,LDLR,NR1D1,ALDH5A1,ABHD17C,TMEM129,PDE4B,WWP2,SCARB1,RNF123,EGFR,SORL1,NFE2L1,SMOX,ANKZF1,TOPORS,EFNA1,UBA1,PDXP,GLUL,ALDH7A1,CCAR2,USP11,UBQLN2,RNF150,OSBPL7,GPC1,ZER1,HSPA1B,RAB26,HERPUD1,TRPC4AP,USP10,ACADSB,AMFR,FZR1,BNIP3,PRKCD,GOT2,GPC5,MYLIP,GLS2,MAP1A,ABHD17B,HSPA1A,UBE2H,KLHL15,FBXO44,AP2A1,NUDT4,SMAD7,CAPN2,EPM2A,CUL4B,GCLC,RNF6,UBE2O,RSPRY…
GO:BP	regulation of cholesterol metabolic process	GO:0090181	0.000419409	3.37736	59	1660	20	17847	SCD,LDLRAP1,ABCG1,LDLR,SREBF1,DHCR7,EPHX2,POR,LMF1,SCAP,ACADVL,FASN,MBTPS2,SQLE,HMGCR,CYP51A1,SREBF2,SEC14L2,HMGCS1,FDFT1
GO:BP	organic hydroxy compound metabolic process	GO:1901615	0.000550456	3.25928	547	1660	88	17847	APP,SCD,ADCYAP1R1,DEGS2,PLCE1,DHCR24,LDLRAP1,ABCG1,GOT1,ALDH1A2,LDLR,CHKA,LDHD,NR1D1,SYNJ1,ISYNA1,SREBF1,PLCH1,SCARB1,INSIG1,CYP39A1,ACO2,NFE2L1,PLCG2,ITPKB,PDXP,DHCR7,EPHX2,ACSS2,OSBPL7,IDH3A,PMEL,FAXDC2,POR,CYP11A1,NUDT4,ITPK1,PLCD3,LMF1,HSD17B4,SCAP,HAGHL,IP6K1,PLCD4,SLC37A4,INPP4B,ACADVL,MAOA,G6PD,FASN,SORD,PNPLA4,MBTPS2,TPI1,CLCN2,TKFC,WNT4,RDH13,SPTLC1,IDH3B,QDPR,MSMO1,SQLE,HMGCR,IP6K2,EPAS…
GO:BP	localization	GO:0051179	0.000571535	3.24296	6824	1660	731	17847	CA3,SCNN1A,HILPDA,SLCO4A1,CA2,FAM110C,ZDHHC14,APP,SH3BP4,HSPA5,DDIT4,STC1,ADCYAP1R1,CA12,PTPRM,SLC2A1,DNAJC6,ATP1A1,DDR1,PITPNM1,CAMSAP3,FRMPD1,BAIAP3,NDNF,MYOC,CDH23,SLC4A3,CD248,NR4A1,SLC20A2,SFRP1,PLCE1,WLS,SLC29A1,TGFBR3,DHCR24,FGF7,MYH10,LDLRAP1,EDN3,ERBB2,SUN1,ACHE,CA9,SLC9A7,PLEKHG5,SYTL4,LAMB1,VAMP1,ABCG1,NOG,WFS1,SLC9A6,PACSIN3,NOL3,EPHB1,BDKRB2,CX3CL1,APLP1,SYTL1,CXADR,AQP1,LDLR,SLC4A4,…
GO:BP	apoptotic process	GO:0006915	0.000583484	3.23397	2013	1660	252	17847	PLK5,DDB1,ITM2C,APP,COL4A3,HSPA5,DDIT4,EGLN3,IL20RA,NDNF,ALX4,CD248,NR4A1,SFRP1,DHCR24,PLEKHG5,CTH,NOG,WFS1,MAP3K12,NOL3,NDUFS1,BDKRB2,CX3CL1,ALDH1A2,APLP1,AQP1,TRAP1,RASSF7,DNM2,DCC,ARHGEF3,FGFR2,WWOX,ANXA6,EGFR,TOPORS,PRKCZ,EFNA1,GPI,LANCL1,MYBBP1A,ITPKB,ENO1,CCAR2,PRUNE2,HK2,MEGF10,NNT,CSRNP1,HSPA1B,HYOU1,NISCH,BHLHB9,NFATC4,ELMO2,HERPUD1,SHC4,MOAP1,GHITM,NSMF,ABL1,DUSP1,BNIP3,ERCC2,PRKCD,CADM…
GO:BP	tricarboxylic acid cycle	GO:0006099	0.000668013	3.17522	36	1660	15	17847	SDHA,ACO2,NNT,IDH3A,DLAT,OGDH,PDHA1,CS,DLD,IDH3B,SUCLG1,SUCLA2,FH,MDH1,SUCLG2
GO:BP	regulation of signaling	GO:0023051	0.000907386	3.04221	3637	1660	418	17847	CA2,FAM110C,ITM2C,APP,AFAP1L2,SH3BP4,HSPA5,DDIT4,ADCYAP1R1,SLC2A1,ATP1A1,IL20RA,FRMPD1,BAIAP3,TRIB2,MYOC,SFRP1,PLCE1,WLS,TGFBR3,FGF7,TOB1,LDLRAP1,EDN3,PIP5K1B,ERBB2,ACHE,PLEKHG5,SYTL4,FAM13A,VAMP1,CTH,NOG,WFS1,MAP3K12,LEMD3,SLC9A6,DKK4,NOL3,ERRFI1,NDRG2,GOT1,EPHB1,PPP5C,BDKRB2,CX3CL1,APLP1,CXADR,SULF2,TSPAN6,TRAP1,AHCYL1,NR1D1,PFKM,DNM2,GRB7,DCC,ARHGEF3,RGS5,NLGN4Y,TSPYL2,SREBF1,SYT11,GRB10,MCF2L…
GO:BP	cellular biosynthetic process	GO:0044249	0.000949038	3.02272	6102	1660	660	17847	DDB1,ITM2C,ZDHHC14,APP,AFAP1L2,HSPA5,SCD,PBXIP1,ADCYAP1R1,ETNPPL,EGLN3,SLC2A1,DEGS2,ATP1A1,PITPNM1,TRIB2,ALX4,ESRRA,NR4A1,SFRP1,RORC,PLCE1,TGFBR3,FGF7,TOB1,ZNF224,PIP5K1B,ERBB2,ACHE,CA9,FADS2,CTH,NOG,WFS1,MAP3K12,LEMD3,ERRFI1,GOT1,PPP5C,CX3CL1,ALDH1A2,LDLR,TRAP1,CDS1,CHKA,NR1D1,PFKM,DNM2,GRB7,ABHD17C,SYNJ1,PPARGC1B,TSPYL2,ISYNA1,SREBF1,SETD3,PDE4B,FGFR2,RIPK4,WWP2,PER1,WWOX,INTS1,SCARB1,PLOD1,ZNF…
GO:BP	response to topologically incorrect protein	GO:0035966	0.000957599	3.01882	200	1660	42	17847	HSPA5,CTH,WFS1,TMEM129,TSPYL2,ANKZF1,HSPA1B,HYOU1,HERPUD1,AMFR,HSPA1A,KLHL15,HSPA9,STC2,SRPRA,ERO1A,ACADVL,VCP,DNAJB9,PPP1R15B,HSPA4L,KDELR3,HSPA4,MBTPS2,MFN2,HSPD1,HERPUD2,DNAJB1,FAF2,CDK5RAP3,SHC1,STT3B,BAK1,CUL7,NCK2,EIF2AK3,PIK3R1,CANX,TMBIM6,ASNS,HSP90B1,HDGF
GO:BP	aerobic respiration	GO:0009060	0.00101844	2.99206	90	1660	25	17847	SDHA,ACO2,COX4I2,NNT,IDH3A,DLAT,UQCRC1,BNIP3,UQCRC2,VCP,OGDH,SIRT3,COX20,PDHA1,CS,DLD,IDH3B,SUCLG1,SUCLA2,MTFR1L,FH,MDH1,NDUFS7,SUCLG2,SURF1
GO:BP	gluconeogenesis	GO:0006094	0.00101844	2.99206	90	1660	25	17847	DDB1,ENO2,GOT1,NR1D1,GPI,ENO1,KAT2A,GOT2,PGAM1,CRY1,PGK1,FOXO1,GAPDH,PC,CRTC2,TPI1,MAEA,ACADM,PGM1,PER2,SLC25A1,GPD2,MDH1,FAM3A,G6PC3
GO:BP	alcohol biosynthetic process	GO:0046165	0.00103602	2.98463	173	1660	38	17847	SCD,ADCYAP1R1,PLCE1,DHCR24,ABCG1,GOT1,ISYNA1,SREBF1,PLCH1,INSIG1,PLCG2,ITPKB,DHCR7,POR,PLCD3,SCAP,IP6K1,PLCD4,G6PD,FASN,MBTPS2,CLCN2,WNT4,SPTLC1,QDPR,MSMO1,SQLE,HMGCR,IP6K2,AKR1B1,CYP51A1,GPER1,SREBF2,NFKB1,SEC14L2,HMGCS1,PLCB4,FDFT1
GO:BP	nitrogen compound transport	GO:0071705	0.00104136	2.9824	2466	1660	298	17847	CA2,ZDHHC14,HSPA5,SLC2A1,PITPNM1,CAMSAP3,BAIAP3,SFRP1,WLS,SLC29A1,MYH10,EDN3,ERBB2,ACHE,SYTL4,ABCG1,CX3CL1,SYTL1,AQP1,AHCYL1,SLC35F3,NR1D1,PFKM,DNM2,RBM15B,TMEM129,SREBF1,SYT11,HOOK1,FAM53C,WWP2,PEX6,MYO7A,REEP2,INSIG1,EGFR,SORL1,NFE2L1,MYH9,RAB11FIP5,BBS1,SLC16A12,SEC14L1,PRKCZ,HADH,C2CD2L,GPI,RAB11FIP1,ATP1B1,SLC25A25,MGARP,GLUL,EPHX2,ATP6V0E2,UPF1,PPFIA3,JUP,SLC22A4,ATG9A,RAB26,NISCH,SLC23A2,C…
GO:BP	cellular response to hormone stimulus	GO:0032870	0.0010759	2.96823	714	1660	107	17847	CA2,DDIT4,STC1,ATP1A1,ESRRA,NR4A1,SFRP1,RORC,ERRFI1,GOT1,PPP5C,AQP1,AHCYL1,NR1D1,PPARGC1B,SREBF1,GRB10,PER1,SORBS1,EGFR,SORL1,GHR,PRKAR1A,JUND,PRKCZ,MGARP,ATP6V0E2,MARS,ADCY3,PAQR7,PKM,NSMF,RORA,DUSP1,PRKCD,CRY2,JUN,HDAC5,RANGAP1,POR,PRCP,CYP11A1,TGFB1,CRY1,TRIM68,TBC1D4,PTPRA,ATP6V0A1,ICAM1,GCLC,BCAR1,RNF6,AKAP13,ADCY7,FOXO1,CALCOCO1,AACS,JUNB,PRKCB,HDAC1,HNRNPU,WDTC1,FOS,PIK3R2,NR1D2,RARB,THRA,…
GO:BP	regulation of steroid metabolic process	GO:0019218	0.00112747	2.9479	121	1660	30	17847	SCD,ATP1A1,RORC,LDLRAP1,ABCG1,LDLR,NR1D1,SREBF1,INSIG1,DHCR7,EPHX2,RORA,POR,LMF1,SCAP,ACADVL,FASN,MBTPS2,CLCN2,WNT4,SQLE,HMGCR,EGR1,CYP51A1,SREBF2,SF1,NFKB1,SEC14L2,HMGCS1,FDFT1
GO:BP	regulation of cellular component organization	GO:0051128	0.00115284	2.93823	2488	1660	300	17847	PLK5,TMOD1,DDB1,FAM110C,ITM2C,APP,SH3BP4,HSPA5,DNAJC6,LZTS3,DDR1,CAMSAP3,NDNF,MYOC,SFRP1,PLCE1,MYH10,LDLRAP1,EDN3,ERBB2,SYTL4,VAMP1,PACSIN3,NOL3,EPHB1,CX3CL1,LDLR,NEDD9,RASSF7,DNM2,DCC,ABHD17C,SYNJ1,TSPYL2,SREBF1,SYT11,CEP85,EPS8L2,AXIN2,INSIG1,SCAF4,EGFR,SORL1,PRKAR1A,NFE2L1,MYH9,SEMA6D,PLCG2,PRKCZ,EFNA1,PDXP,MGARP,PRKCSH,ING1,ASAP3,ENO1,CCAR2,UBQLN2,UPF1,NUMA1,HK2,EIF4G1,ATMIN,SERPINI1,ANK1,HSP…
GO:BP	monocarboxylic acid catabolic process	GO:0072329	0.00127266	2.89529	128	1660	31	17847	LDHD,ALDH5A1,ACADS,CYP39A1,HADH,PCCA,SLC27A4,CPT1C,HSD17B4,ACAD10,FAAH,ACADVL,AUH,PCCB,SORD,IVD,ECHDC2,ETFB,ACAT1,HADHB,ECI1,ACADM,SLC25A17,LPIN1,ABCD3,ETFDH,CRAT,MUT,PGD,ACOX2,HADHA
GO:BP	sulfur compound metabolic process	GO:0006790	0.00127434	2.89472	373	1660	65	17847	SCD,ACOT11,NDNF,CTH,AHCYL1,ALDH5A1,FAR2,GHR,NFE2L1,MICAL2,B4GAT1,PCCA,XYLT2,PDHX,ACSS2,DLAT,CNDP2,ELOVL5,HSPA9,B3GNT7,ST3GAL3,HSD17B4,GCLC,GSTM1,CHPF,MCCC1,OGDH,G6PD,CHSY1,FASN,B3GNT2,PCCB,SUOX,PC,GSTM2,HYAL1,PDHA1,SLC19A2,PCYOX1,NFS1,ACAT1,DLD,GSTM4,GSTM3,AHCY,ACSL3,MTHFD1,SUCLG1,SUCLA2,PDK1,SLC25A1,MMS19,MUT,ACOT2,CIAO1,TXN2,ENOPH1,CHST15,HMGCS1,GLB1,SLC26A2,GSS,B4GALT3,SUCLG2,CIAPIN1
GO:BP	cell death	GO:0008219	0.00132297	2.87845	2290	1660	279	17847	PLK5,DDB1,ITM2C,APP,COL4A3,HSPA5,DDIT4,ADCYAP1R1,EGLN3,IL20RA,NDNF,ALX4,CD248,NR4A1,SFRP1,DHCR24,PLEKHG5,CTH,NOG,WFS1,MAP3K12,NOL3,NDUFS1,EPHB1,PPP5C,BDKRB2,CX3CL1,ALDH1A2,APLP1,AQP1,TRAP1,RASSF7,DNM2,DCC,ARHGEF3,KRT12,FGFR2,WWOX,ANXA6,AXIN2,EGFR,SORL1,GHR,PLCG2,TOPORS,PRKCZ,EFNA1,GPI,LANCL1,MYBBP1A,ITPKB,ING1,KRT15,ENO1,CCAR2,PRUNE2,JUP,HK2,MEGF10,NNT,EIF4G1,CSRNP1,KAZN,HSPA1B,HYOU1,NISCH,BHLHB9…
GO:BP	response to oxygen levels	GO:0070482	0.00147754	2.83046	398	1660	68	17847	HILPDA,DDIT4,STC1,EGLN3,SLC2A1,NDNF,SFRP1,TGFBR3,CA9,NOL3,AQP1,PLOD1,COX4I2,ATP1B1,MGARP,ENO1,POLR2A,HK2,HYOU1,PKM,RORA,BNIP3,ERCC2,EGLN1,TGFB1,STC2,PDGFRB,CAPN2,PGK1,ICAM1,SCAP,PICK1,ITPR1,ERO1A,FOXO1,ERCC3,AK4,CDKN1B,HMOX1,TM9SF4,PSMD2,XRCC1,USP19,UBC,AIFM1,SLC9A1,BNIP3L,ACTN4,SLC11A2,NPEPPS,AHCY,PINK1,EGR1,EPAS1,ATP7A,ATP6AP1,PSMD3,FAM162A,PDK1,CYGB,ATP6V1A,ENDOG,TMBIM6,TXN2,HSP90B1,DNM1L,PLK3…
GO:BP	transport	GO:0006810	0.00163671	2.78603	5296	1660	580	17847	CA3,SCNN1A,SLCO4A1,CA2,ZDHHC14,APP,SH3BP4,HSPA5,STC1,ADCYAP1R1,CA12,SLC2A1,DNAJC6,ATP1A1,DDR1,PITPNM1,CAMSAP3,BAIAP3,CDH23,SLC4A3,SLC20A2,SFRP1,PLCE1,WLS,SLC29A1,FGF7,MYH10,LDLRAP1,EDN3,ERBB2,SUN1,ACHE,CA9,SLC9A7,SYTL4,VAMP1,ABCG1,WFS1,SLC9A6,PACSIN3,NOL3,BDKRB2,CX3CL1,APLP1,SYTL1,CXADR,AQP1,LDLR,SLC4A4,CHKA,AHCYL1,TPD52,SLC35F3,NR1D1,PFKM,DNM2,RBM15B,TMEM129,SYNJ1,NLGN4Y,ESYT1,OSBP2,SREBF1,SYT11…
GO:BP	phosphate-containing compound metabolic process	GO:0006796	0.00179299	2.74642	3351	1660	387	17847	PLK5,CA3,MAPK4,APP,AFAP1L2,SCD,DDIT4,ADCYAP1R1,ACOT11,ETNPPL,SDHA,PTPRM,DNAJC6,ATP1A1,DDR1,PITPNM1,CAMSAP3,ENO2,TRIB2,MYOC,PFKP,SFRP1,PLCE1,TGFBR3,FGF7,EDN3,PIP5K1B,ERBB2,ACHE,NOG,MAP3K12,ERRFI1,NDRG2,NDUFS1,EPHB1,PPP5C,BDKRB2,CX3CL1,LDLR,CDK18,NEDD9,CDS1,CHKA,PFKM,PFKFB4,ALDH5A1,SYNJ1,PPARGC1B,TSPYL2,ISYNA1,GRB10,SHPK,PIK3IP1,PDE4B,FGFR2,RIPK4,CEP85,PLCH1,PER1,SCARB1,AXIN2,FAR2,PXYLP1,STK32B,COX…
GO:BP	response to organic cyclic compound	GO:0014070	0.00188275	2.72521	983	1660	137	17847	CA2,APP,HSPA5,DDIT4,STC1,ADCYAP1R1,ATP1A1,ESRRA,NR4A1,SFRP1,RORC,CA9,ERRFI1,GOT1,PPP5C,ALDH1A2,APLP1,AQP1,CHKA,NR1D1,DNM2,PPARGC1B,SREBF1,PDE4B,PER1,HOMER2,INSIG1,EGFR,GHR,NFE2L1,JUND,GPI,PDXP,MGARP,PTPRU,POLR2A,OSBPL7,JUP,ADCY3,PAQR7,GNA14,KAT2A,NFATC4,EFTUD2,RORA,ABL1,ABCA3,DUSP1,SLC3A2,CRY2,GOT2,NQO1,STXBP1,JUN,HDAC5,IFIT1,CD83,RAPGEF1,TGFB1,CRY1,NFKBIA,TRIM68,STC2,PDGFRB,ICAM1,GCLC,SLC37A4,KD…
GO:BP	cellular response to steroid hormone stimulus	GO:0071383	0.00211641	2.6744	249	1660	48	17847	DDIT4,STC1,ATP1A1,ESRRA,NR4A1,SFRP1,RORC,ERRFI1,PPP5C,AQP1,NR1D1,PPARGC1B,PER1,EGFR,MGARP,PAQR7,RORA,CRY2,TGFB1,CRY1,TRIM68,ICAM1,RNF6,AKAP13,FOXO1,CALCOCO1,HDAC1,HNRNPU,NR1D2,RARB,THRA,NCOA1,ZFP36,ESRRG,AIFM1,RNF4,RARA,KAT5,DDX54,UBR5,TAF7,MED1,GPER1,NR2F6,NCOA4,DDX17,NPC1,SAFB2
GO:BP	regulation of cell communication	GO:0010646	0.00214811	2.66794	3595	1660	411	17847	CA2,FAM110C,ITM2C,APP,AFAP1L2,SH3BP4,HSPA5,DDIT4,ADCYAP1R1,SLC2A1,IL20RA,FRMPD1,BAIAP3,TRIB2,MYOC,SFRP1,PLCE1,WLS,TGFBR3,FGF7,TOB1,LDLRAP1,EDN3,PIP5K1B,ERBB2,ACHE,PLEKHG5,SYTL4,FAM13A,VAMP1,CTH,NOG,WFS1,MAP3K12,LEMD3,SLC9A6,DKK4,NOL3,ERRFI1,NDRG2,GOT1,EPHB1,PPP5C,BDKRB2,CX3CL1,APLP1,CXADR,SULF2,TSPAN6,TRAP1,NR1D1,PFKM,DNM2,GRB7,DCC,ARHGEF3,RGS5,NLGN4Y,TSPYL2,SREBF1,SYT11,GRB10,MCF2L2,PIK3IP1,FGFR…
GO:BP	phosphorus metabolic process	GO:0006793	0.00218209	2.66113	3377	1660	389	17847	PLK5,CA3,MAPK4,APP,AFAP1L2,SCD,DDIT4,ADCYAP1R1,ACOT11,ETNPPL,SDHA,PTPRM,DNAJC6,ATP1A1,DDR1,PITPNM1,CAMSAP3,ENO2,TRIB2,MYOC,PFKP,SFRP1,PLCE1,TGFBR3,FGF7,EDN3,PIP5K1B,ERBB2,ACHE,NOG,MAP3K12,ERRFI1,NDRG2,NDUFS1,EPHB1,PPP5C,BDKRB2,CX3CL1,LDLR,CDK18,NEDD9,CDS1,CHKA,PFKM,PFKFB4,ALDH5A1,SYNJ1,PPARGC1B,TSPYL2,ISYNA1,GRB10,SHPK,PIK3IP1,PDE4B,FGFR2,RIPK4,CEP85,PLCH1,PER1,SCARB1,AXIN2,FAR2,PXYLP1,STK32B,COX…
GO:BP	protein transport	GO:0015031	0.00222709	2.65226	2084	1660	256	17847	ZDHHC14,HSPA5,SLC2A1,PITPNM1,CAMSAP3,BAIAP3,SFRP1,WLS,MYH10,ERBB2,ACHE,SYTL4,ABCG1,CX3CL1,SYTL1,AHCYL1,NR1D1,PFKM,DNM2,RBM15B,TMEM129,SREBF1,SYT11,HOOK1,FAM53C,WWP2,PEX6,MYO7A,REEP2,INSIG1,EGFR,SORL1,MYH9,RAB11FIP5,BBS1,PRKCZ,HADH,C2CD2L,GPI,RAB11FIP1,ATP1B1,MGARP,GLUL,EPHX2,ATP6V0E2,UPF1,JUP,ATG9A,RAB26,CPSF1,AKAP8L,HERPUD1,ABL1,TFRC,PRKCD,CADM1,CRY2,STXBP1,BET1L,HK1,PTPRN2,IFIT1,RANGAP1,MAP1A,U…
GO:BP	positive regulation of catabolic process	GO:0009896	0.00238131	2.62318	435	1660	72	17847	DDB1,APP,SH3BP4,TRIB2,TOB1,PACSIN3,LDLR,PFKFB4,WWP2,SORL1,UBQLN2,UPF1,OSBPL7,HK2,NNT,ZER1,HSPA1B,HERPUD1,FZR1,BNIP3,PRKCD,PIP4K2C,MYLIP,HSPA1A,SMAD7,EPM2A,CUL4B,PNPLA2,GCLC,VCP,TPCN1,FOXO1,MUL1,VPS11,CNOT8,SNX33,PUM1,MFN2,RNF40,CDKN1B,HMOX1,PFKFB3,RNF139,CSNK1A1,ZFP36,SPTLC1,PIM2,BNIP3L,BTG2,NPRL2,USP5,CALCOCO2,ZBTB20,KAT5,PINK1,GGA3,AMBRA1,MAGEF1,GJA1,FAF1,OAZ2,FTO,TNFAIP3,SUPV3L1,ENDOG,ADAM9,DA…
GO:BP	organophosphate biosynthetic process	GO:0090407	0.00241123	2.61776	599	1660	92	17847	SCD,ADCYAP1R1,ETNPPL,PITPNM1,PLCE1,PIP5K1B,ACHE,CDS1,CHKA,SYNJ1,ISYNA1,PLCH1,MTMR4,DCAKD,PI4KA,PLCG2,ADSSL1,ITPKB,PANK4,ENO1,PDHX,ACSS2,GPD1L,ADCY3,ETNK2,PKM,DLAT,TKT,PTDSS1,PIP4K2C,PIGL,ELOVL5,PRPSAP1,PIGG,PANK1,PLCD3,CAPN2,CYC1,IP6K1,PLCD4,INPP4B,ADCY7,VCP,NAPRT,G6PD,PIP5K1A,FASN,SORD,AGK,CKMT1B,PDHA1,PIK3R2,AK4,TPI1,MTMR12,UCKL1,CPNE1,PIGO,NFS1,ACAT1,PIGH,SPTLC1,DLD,MTMR6,MTM1,SBF1,PINK1,PIP5K…
GO:BP	intracellular receptor signaling pathway	GO:0030522	0.00247507	2.60641	280	1660	52	17847	ESRRA,NR4A1,SFRP1,RORC,PPP5C,ALDH1A2,TSPAN6,NR1D1,PPARGC1B,SREBF1,PER1,SEC14L1,HSPA1B,RORA,CRY2,PRCP,HSPA1A,CRY1,NFKBIA,TRIM68,RNF6,CALCOCO1,HDAC1,PUM1,NR1D2,RARB,THRA,TKFC,NCOA1,ESRRG,UBC,TRIM16,RNF4,RARA,ACTN4,KAT5,RIOK3,DDX54,FAM120B,UBR5,TAF7,MED1,CRKL,GPER1,NR2F6,NCOA4,TNFAIP3,DDX17,LSM14A,STAT3,SAFB2,TIFA
GO:BP	regulation of cell death	GO:0010941	0.00293414	2.53252	1760	1660	221	17847	PLK5,DDB1,ITM2C,COL4A3,HSPA5,DDIT4,ADCYAP1R1,EGLN3,IL20RA,NDNF,ALX4,CD248,NR4A1,SFRP1,DHCR24,PLEKHG5,CTH,NOG,WFS1,MAP3K12,NOL3,EPHB1,PPP5C,BDKRB2,CX3CL1,ALDH1A2,AQP1,TRAP1,DNM2,DCC,ARHGEF3,FGFR2,WWOX,AXIN2,EGFR,SORL1,GHR,PLCG2,TOPORS,PRKCZ,EFNA1,GPI,LANCL1,MYBBP1A,ITPKB,ING1,ENO1,CCAR2,NNT,EIF4G1,HSPA1B,HYOU1,BHLHB9,NFATC4,HERPUD1,MOAP1,NSMF,ABL1,DUSP1,NPAS2,BNIP3,PRKCD,NFKBID,NQO1,STXBP1,JUN,ITP…
GO:BP	programmed cell death	GO:0012501	0.00305873	2.51446	2159	1660	263	17847	PLK5,DDB1,ITM2C,APP,COL4A3,HSPA5,DDIT4,EGLN3,IL20RA,NDNF,ALX4,CD248,NR4A1,SFRP1,DHCR24,PLEKHG5,CTH,NOG,WFS1,MAP3K12,NOL3,NDUFS1,BDKRB2,CX3CL1,ALDH1A2,APLP1,AQP1,TRAP1,RASSF7,DNM2,DCC,ARHGEF3,KRT12,FGFR2,WWOX,ANXA6,EGFR,PLCG2,TOPORS,PRKCZ,EFNA1,GPI,LANCL1,MYBBP1A,ITPKB,KRT15,ENO1,CCAR2,PRUNE2,JUP,HK2,MEGF10,NNT,CSRNP1,KAZN,HSPA1B,HYOU1,NISCH,BHLHB9,NFATC4,PKM,ELMO2,HERPUD1,SHC4,MOAP1,GHITM,NSMF,AB…
GO:BP	protein localization to organelle	GO:0033365	0.00336679	2.47278	949	1660	132	17847	SH3BP4,HSPA5,SUN1,DNM2,ABHD17C,SREBF1,SYT11,FAM53C,PEX6,INSIG1,SORL1,BBS1,TOPORS,PRKCZ,MGARP,GLUL,EPHX2,JUP,NUMA1,HK2,MOAP1,PRKCD,CRY2,HK1,RANGAP1,MAP1A,ABHD17B,UQCRC2,TGFB1,NFKBIA,AP3D1,ATG13,NOLC1,NUP58,EPM2A,GLI3,SEC61A1,HSD17B4,SRPRA,GAK,TRIM29,PARP3,SPIDR,KDELR3,VPS11,HSPA4,HNRNPU,MAGED1,AGK,HGS,TOMM20,MFN2,HUWE1,RPA1,FGF9,PIK3R2,PACS1,LZTS2,IFT122,GOLGB1,VPS37B,LRRC1,RNF31,RRS1,LAMP2,HSPD1,…
GO:BP	cellular response to oxygen-containing compound	GO:1901701	0.0033871	2.47017	1218	1660	162	17847	COL4A6,CA2,APP,SH3BP4,HSPA5,DDIT4,STC1,BAIAP3,ESRRA,NR4A1,SFRP1,RORC,ERRFI1,GOT1,PPP5C,CX3CL1,ALDH1A2,APLP1,AQP1,LDLR,TRAP1,AHCYL1,NR1D1,DNM2,PPARGC1B,SREBF1,GRB10,SHPK,PDE4B,FGFR2,SCARB1,SORBS1,INSIG1,EGFR,SORL1,GHR,PRKAR1A,NFE2L1,RAB11FIP5,ANKZF1,PRKCZ,C2CD2L,KLF10,PDXP,MGARP,ATP6V0E2,UPF1,OSBPL7,JUP,MARS,WNT5B,ADCY3,GNA14,NFATC4,PKM,NSMF,RORA,ABL1,BNIP3,PRKCD,NQO1,JUN,HDAC5,PTPRN2,RANGAP1,POR,…
GO:BP	peptide transport	GO:0015833	0.00345597	2.46143	2124	1660	259	17847	CA2,ZDHHC14,HSPA5,SLC2A1,PITPNM1,CAMSAP3,BAIAP3,SFRP1,WLS,MYH10,EDN3,ERBB2,ACHE,SYTL4,ABCG1,CX3CL1,SYTL1,AHCYL1,NR1D1,PFKM,DNM2,RBM15B,TMEM129,SREBF1,SYT11,HOOK1,FAM53C,WWP2,PEX6,MYO7A,REEP2,INSIG1,EGFR,SORL1,MYH9,RAB11FIP5,BBS1,PRKCZ,HADH,C2CD2L,GPI,RAB11FIP1,ATP1B1,MGARP,GLUL,EPHX2,ATP6V0E2,UPF1,JUP,ATG9A,RAB26,CPSF1,AKAP8L,HERPUD1,ABL1,TFRC,PRKCD,CADM1,CRY2,STXBP1,BET1L,HK1,PTPRN2,IFIT1,RANGAP…
GO:BP	secondary alcohol metabolic process	GO:1902652	0.0037753	2.42305	161	1660	35	17847	APP,SCD,DHCR24,LDLRAP1,ABCG1,LDLR,SREBF1,SCARB1,INSIG1,CYP39A1,ACO2,NFE2L1,DHCR7,EPHX2,IDH3A,POR,CYP11A1,LMF1,SCAP,ACADVL,G6PD,FASN,MBTPS2,IDH3B,MSMO1,SQLE,HMGCR,FGFR1,CYP51A1,SREBF2,NPC1,SEC14L2,HMGCS1,FDFT1,HDLBP
GO:BP	cellular response to unfolded protein	GO:0034620	0.00392	2.40671	141	1660	32	17847	HSPA5,CTH,WFS1,TSPYL2,HSPA1B,HYOU1,HERPUD1,AMFR,HSPA1A,HSPA9,STC2,SRPRA,ERO1A,ACADVL,VCP,DNAJB9,PPP1R15B,KDELR3,MBTPS2,HERPUD2,CDK5RAP3,SHC1,BAK1,CUL7,NCK2,EIF2AK3,PIK3R1,CANX,TMBIM6,ASNS,HSP90B1,HDGF
GO:BP	mitochondrial transport	GO:0006839	0.00457652	2.33946	263	1660	49	17847	NOL3,SREBF1,MGARP,HK2,MOAP1,BNIP3,HSPA1A,UQCRC2,ATG13,CYC1,GCLC,MUL1,VPS11,HSPA4,AGK,SPG7,TOMM20,MFN2,HUWE1,KIF1BP,RNF31,HSPD1,MIPEP,PITRM1,TP53BP2,SLC9A1,BNIP3L,BAP1,AFG3L2,SLC25A23,NPEPPS,PINK1,TFDP1,MICU2,TIMM23B,BAK1,SLC25A1,SREBF2,RHOT1,CHCHD4,HTRA2,SLC25A36,STAT3,MTX2,CNP,TIMM21,SLC25A5,ARIH2,SLC25A6
GO:BP	lipid biosynthetic process	GO:0008610	0.00459814	2.33742	710	1660	104	17847	SCD,ETNPPL,DEGS2,ATP1A1,PITPNM1,PLCE1,DHCR24,PIP5K1B,ACHE,FADS2,ABCG1,ALDH1A2,LDLR,CDS1,CHKA,NR1D1,SYNJ1,ISYNA1,SREBF1,SCARB1,SORBS1,INSIG1,CYP39A1,MTMR4,PI4KA,PLCG2,DHCR7,EPHX2,ACSS2,GPD1L,OSBPL7,ETNK2,PTDSS1,PRKCD,PIP4K2C,PIGL,FAXDC2,POR,CYP11A1,ELOVL5,PIGG,CAPN2,HSD17B4,SCAP,INPP4B,DHRS11,ACADVL,G6PD,PIP5K1A,WDTC1,FASN,PCCB,SIRT3,AGK,MBTPS2,PIK3R2,MTMR12,CLCN2,WNT4,CPNE1,PIGO,PIGH,SPTLC1,GSTM4…
GO:BP	glucose catabolic process to pyruvate	GO:0061718	0.00463854	2.33362	27	1660	12	17847	ENO2,PFKP,PFKM,GPI,ENO1,HK2,PKM,HK1,PGAM1,PGK1,GAPDH,TPI1
GO:BP	canonical glycolysis	GO:0061621	0.00463854	2.33362	27	1660	12	17847	ENO2,PFKP,PFKM,GPI,ENO1,HK2,PKM,HK1,PGAM1,PGK1,GAPDH,TPI1
GO:BP	NADH regeneration	GO:0006735	0.00463854	2.33362	27	1660	12	17847	ENO2,PFKP,PFKM,GPI,ENO1,HK2,PKM,HK1,PGAM1,PGK1,GAPDH,TPI1
GO:BP	establishment of protein localization	GO:0045184	0.004664	2.33124	2199	1660	266	17847	ZDHHC14,HSPA5,SLC2A1,PITPNM1,CAMSAP3,FRMPD1,BAIAP3,SFRP1,WLS,MYH10,ERBB2,ACHE,SYTL4,ABCG1,CX3CL1,SYTL1,AHCYL1,NR1D1,PFKM,DNM2,RBM15B,TMEM129,SREBF1,SYT11,HOOK1,FAM53C,WWP2,PEX6,MYO7A,REEP2,INSIG1,EGFR,SORL1,MYH9,RAB11FIP5,BBS1,PRKCZ,HADH,C2CD2L,GPI,RAB11FIP1,ATP1B1,MGARP,GLUL,EPHX2,ATP6V0E2,UPF1,JUP,HK2,ATG9A,RAB26,CPSF1,AKAP8L,HERPUD1,MOAP1,ABL1,TFRC,PRKCD,CADM1,CRY2,STXBP1,BET1L,HK1,PTPRN2,IFIT…
GO:BP	circadian regulation of gene expression	GO:0032922	0.00490381	2.30947	62	1660	19	17847	RORC,NR1D1,PER1,MYBBP1A,CIART,RORA,NPAS2,BHLHE40,CRY2,CRY1,HDAC1,HNRNPU,MAGED1,HUWE1,BHLHE41,EGR1,PER2,PER3,PRMT5
GO:BP	intracellular protein transport	GO:0006886	0.00491979	2.30805	1162	1660	155	17847	ZDHHC14,HSPA5,CAMSAP3,WLS,ERBB2,SYTL4,SYTL1,AHCYL1,RBM15B,TMEM129,SREBF1,FAM53C,PEX6,MYO7A,REEP2,INSIG1,SORL1,ATP1B1,MGARP,EPHX2,UPF1,JUP,RAB26,CPSF1,AKAP8L,HERPUD1,PRKCD,CRY2,IFIT1,RANGAP1,MAP1A,UQCRC2,TGFB1,NFKBIA,AP3D1,ATG13,HSPA9,AP2A1,NOLC1,SGSM2,NUP58,CCHCR1,TBC1D4,EPM2A,TBC1D12,GLI3,DUSP16,TBC1D9B,SEC61A1,HSD17B4,TBC1D9,SRPRA,TTC30A,PICK1,VPS39,RUNDC1,VCP,SEC24C,RAPGEF3,NXF1,VPS11,HSPA4,XP…
GO:BP	cellular response to chemical stimulus	GO:0070887	0.00498856	2.30202	3364	1660	385	17847	PLK5,COL4A6,HILPDA,CA2,MAPK4,APP,SH3BP4,HSPA5,DDIT4,STC1,EGLN3,ATP1A1,IL20RA,BAIAP3,NDNF,PFKP,ESRRA,NR4A1,SFRP1,RORC,TGFBR3,FGF7,TOB1,LDLRAP1,EDN3,ERBB2,CA9,PLEKHG5,CTH,NOG,WFS1,LEMD3,SLC9A6,NOL3,ERRFI1,GOT1,EPHB1,PPP5C,CX3CL1,ALDH1A2,APLP1,CXADR,SULF2,AQP1,LDLR,TRAP1,AHCYL1,NR1D1,DNM2,PPARGC1B,TSPYL2,SREBF1,SYT11,GRB10,SHPK,PDE4B,FGFR2,PER1,WWOX,SCARB1,SORBS1,INSIG1,COX4I2,EGFR,SORL1,MTMR4,GHR,P…
GO:BP	fatty acid catabolic process	GO:0009062	0.00546721	2.26223	104	1660	26	17847	ACADS,HADH,PCCA,SLC27A4,CPT1C,HSD17B4,ACAD10,FAAH,ACADVL,AUH,PCCB,IVD,ECHDC2,ETFB,ACAT1,HADHB,ECI1,ACADM,SLC25A17,LPIN1,ABCD3,ETFDH,CRAT,MUT,ACOX2,HADHA
GO:BP	response to decreased oxygen levels	GO:0036293	0.00565821	2.24732	373	1660	63	17847	HILPDA,DDIT4,STC1,EGLN3,SLC2A1,NDNF,SFRP1,TGFBR3,CA9,NOL3,AQP1,PLOD1,COX4I2,ATP1B1,MGARP,ENO1,HK2,HYOU1,PKM,RORA,BNIP3,ERCC2,EGLN1,TGFB1,STC2,CAPN2,PGK1,ICAM1,SCAP,PICK1,ITPR1,ERO1A,ERCC3,AK4,CDKN1B,HMOX1,TM9SF4,PSMD2,XRCC1,USP19,UBC,AIFM1,SLC9A1,BNIP3L,ACTN4,SLC11A2,NPEPPS,AHCY,PINK1,EGR1,EPAS1,ATP7A,PSMD3,FAM162A,PDK1,CYGB,ENDOG,TMBIM6,TXN2,HSP90B1,DNM1L,PLK3,CPEB4
GO:BP	nitrogen compound metabolic process	GO:0006807	0.00581486	2.23546	10039	1660	1022	17847	PLK5,DDB1,RBM38,MAPK4,ITM2C,ZDHHC14,APP,COL4A3,AFAP1L2,HSPA5,SCD,PBXIP1,DDIT4,ACOT11,PDZRN3,EGLN3,PTPRM,DEGS2,DNAJC6,DDR1,ENO2,TRIB2,NDNF,MYOC,ALX4,MKRN3,PFKP,ESRRA,SPON1,NR4A1,CPAMD8,SFRP1,RORC,PLCE1,SLC29A1,TGFBR3,DHCR24,FGF7,TOB1,ZNF224,LDLRAP1,EDN3,ERBB2,ACHE,CA9,PLEKHG5,LAMB1,CTH,ABCG1,NOG,WFS1,MAP3K12,LEMD3,PACSIN3,NOL3,ERRFI1,NDRG2,GOT1,EPHB1,PPP5C,BDKRB2,CX3CL1,EEPD1,SULF2,AQP1,LDLR,TRAP1…
GO:BP	macromolecule catabolic process	GO:0009057	0.0058182	2.23521	1431	1660	184	17847	DDB1,RBM38,HSPA5,TRIB2,TOB1,PLEKHG5,WFS1,PACSIN3,LDLR,NR1D1,PFKM,ABHD17C,TMEM129,WWP2,AXIN2,RNF123,EGFR,SORL1,NFE2L1,ANKZF1,TOPORS,EFNA1,UBA1,CCAR2,USP11,UBQLN2,UPF1,RNF150,OSBPL7,GPC1,EIF4G1,ZER1,HSPA1B,RAB26,HERPUD1,TRPC4AP,USP10,AMFR,FZR1,BNIP3,PRKCD,GPC5,MYLIP,AEN,MAP1A,ABHD17B,HSPA1A,UBE2H,KLHL15,FBXO44,AP2A1,SMAD7,CAPN2,EPM2A,SNX25,H1F0,CUL4B,TBRG4,GCLC,RNF6,UBE2O,RSPRY1,LRIG2,CNOT3,VCP,RBB…
GO:BP	cofactor metabolic process	GO:0051186	0.00594958	2.22551	462	1660	74	17847	SCD,ACOT11,SLC2A1,GOT1,AHCYL1,ALDH5A1,FAR2,EGFR,DCAKD,NFE2L1,PDXP,PANK4,PCCA,PDHX,ACSS2,NNT,SLC23A2,DLAT,CNDP2,GOT2,SLC2A3,ELOVL5,HSPA9,PANK1,HSD17B4,GCLC,GSTM1,PPOX,VCP,ALAS1,MCCC1,NAPRT,OGDH,G6PD,FASN,PCCB,PC,PRDX2,ABCB6,GSTM2,PDHA1,HMOX1,NFS1,ACAT1,DLD,GSTM4,GSTM3,IDH3B,QDPR,SLC11A2,AHCY,PINK1,HMGCR,ACSL3,MTHFD1,AKR1B1,SUCLG1,SUCLA2,PDK1,SLC25A1,MMS19,MUT,ACOT2,CIAO1,EIF2AK1,ENOPH1,STAT3,LMBRD…
GO:BP	cellular response to organic substance	GO:0071310	0.00600579	2.22143	2788	1660	326	17847	PLK5,COL4A6,CA2,MAPK4,APP,SH3BP4,HSPA5,DDIT4,STC1,ATP1A1,IL20RA,BAIAP3,PFKP,ESRRA,NR4A1,SFRP1,RORC,TGFBR3,FGF7,TOB1,LDLRAP1,ERBB2,CTH,NOG,WFS1,LEMD3,SLC9A6,NOL3,ERRFI1,GOT1,PPP5C,CX3CL1,ALDH1A2,APLP1,SULF2,AQP1,LDLR,AHCYL1,NR1D1,DNM2,PPARGC1B,TSPYL2,SREBF1,GRB10,SHPK,PDE4B,FGFR2,PER1,WWOX,SCARB1,SORBS1,INSIG1,EGFR,SORL1,MTMR4,GHR,PRKAR1A,NFE2L1,RAB11FIP5,JUND,ANKZF1,PRKCZ,C2CD2L,KLF10,PDXP,MGARP,…
GO:BP	amide transport	GO:0042886	0.00602666	2.21992	2158	1660	261	17847	CA2,ZDHHC14,HSPA5,SLC2A1,PITPNM1,CAMSAP3,BAIAP3,SFRP1,WLS,MYH10,EDN3,ERBB2,ACHE,SYTL4,ABCG1,CX3CL1,SYTL1,AHCYL1,NR1D1,PFKM,DNM2,RBM15B,TMEM129,SREBF1,SYT11,HOOK1,FAM53C,WWP2,PEX6,MYO7A,REEP2,INSIG1,EGFR,SORL1,MYH9,RAB11FIP5,BBS1,PRKCZ,HADH,C2CD2L,GPI,RAB11FIP1,ATP1B1,MGARP,GLUL,EPHX2,ATP6V0E2,UPF1,JUP,ATG9A,RAB26,CPSF1,AKAP8L,HERPUD1,ABL1,TFRC,PRKCD,CADM1,CRY2,STXBP1,BET1L,HK1,PTPRN2,IFIT1,RANGAP…
GO:BP	cellular lipid metabolic process	GO:0044255	0.00644229	2.19096	1068	1660	144	17847	SCD,ACOT11,ETNPPL,DEGS2,PITPNM1,PLCE1,PIP5K1B,ACHE,FADS2,ABCG1,ALDH1A2,LDLR,CDS1,CHKA,ALDH5A1,SYNJ1,ISYNA1,ESYT1,ACADS,SREBF1,PIK3IP1,SCARB1,INSIG1,EGFR,SORL1,MTMR4,NFE2L1,PI4KA,PLCG2,HADH,PCCA,EPHX2,ACSS2,GPD1L,GPC1,SLC22A4,SLC27A4,SERINC2,ETNK2,PTDSS1,CPT1C,ACADSB,PRKCD,PIP4K2C,TEX2,GPC5,PIGL,POR,CERK,ELOVL5,PIGG,PDGFRB,CAPN2,LMF1,FAAH2,PNPLA2,HSD17B4,ACAD10,ENPP6,PNPLA6,SCAP,FAAH,IP6K1,PLCD4,S…
GO:BP	regulation of cellular protein localization	GO:1903827	0.00736734	2.13269	539	1660	83	17847	LDLRAP1,ERBB2,ABHD17C,SREBF1,SYT11,SORBS1,INSIG1,EGFR,SORL1,RAB11FIP5,PRKCZ,GLUL,GPD1L,JUP,NUMA1,GPC1,AKAP8L,PRKCD,GPC5,RANGAP1,MAP1A,ABHD17B,TGFB1,ATG13,NOLC1,RAB11FIP2,NUP58,EPM2A,GLI3,KDM1A,TRIM29,LRIG2,SPIDR,CDH2,RAPGEF3,VPS11,SNX33,MAGED1,HUWE1,PIK3R2,TMBIM1,LZTS2,TM9SF4,RNF31,TP53BP2,TRIM28,BNIP3L,BAP1,GAS8,NPEPPS,PINK1,CDK5RAP3,ITGB1,ACSL3,GDI1,TFDP1,GSN,TMEM30A,ITGA3,UBR5,TCF7L2,CRKL,OAZ2…
GO:BP	positive regulation of cellular catabolic process	GO:0031331	0.00739115	2.13129	368	1660	62	17847	APP,SH3BP4,TRIB2,TOB1,PACSIN3,LDLR,PFKFB4,UBQLN2,UPF1,OSBPL7,HK2,NNT,ZER1,HSPA1B,HERPUD1,BNIP3,PRKCD,PIP4K2C,HSPA1A,SMAD7,EPM2A,PNPLA2,GCLC,VCP,TPCN1,FOXO1,MUL1,VPS11,CNOT8,SNX33,PUM1,MFN2,RNF40,HMOX1,PFKFB3,RNF139,CSNK1A1,ZFP36,SPTLC1,PIM2,BNIP3L,BTG2,NPRL2,USP5,CALCOCO2,ZBTB20,KAT5,PINK1,AMBRA1,MAGEF1,FAF1,FTO,TNFAIP3,SUPV3L1,ENDOG,ADAM9,DAPK1,PTK2,PLK3,ARIH2,VPS13D,HSPBP1
GO:BP	glycolytic process through fructose-6-phosphate	GO:0061615	0.0074308	2.12896	28	1660	12	17847	ENO2,PFKP,PFKM,GPI,ENO1,HK2,PKM,HK1,PGAM1,PGK1,GAPDH,TPI1
GO:BP	glycolytic process through glucose-6-phosphate	GO:0061620	0.0074308	2.12896	28	1660	12	17847	ENO2,PFKP,PFKM,GPI,ENO1,HK2,PKM,HK1,PGAM1,PGK1,GAPDH,TPI1
GO:BP	establishment of localization	GO:0051234	0.00801991	2.09583	5419	1660	586	17847	CA3,SCNN1A,SLCO4A1,CA2,ZDHHC14,APP,SH3BP4,HSPA5,STC1,ADCYAP1R1,CA12,SLC2A1,DNAJC6,ATP1A1,DDR1,PITPNM1,CAMSAP3,FRMPD1,BAIAP3,CDH23,SLC4A3,SLC20A2,SFRP1,PLCE1,WLS,SLC29A1,FGF7,MYH10,LDLRAP1,EDN3,ERBB2,SUN1,ACHE,CA9,SLC9A7,SYTL4,VAMP1,ABCG1,WFS1,SLC9A6,PACSIN3,NOL3,BDKRB2,CX3CL1,APLP1,SYTL1,CXADR,AQP1,LDLR,SLC4A4,CHKA,AHCYL1,TPD52,SLC35F3,NR1D1,PFKM,DNM2,RBM15B,TMEM129,SYNJ1,NLGN4Y,ESYT1,OSBP2,SREBF…
GO:BP	cellular response to oxygen levels	GO:0071453	0.00890051	2.05059	239	1660	45	17847	HILPDA,STC1,EGLN3,NDNF,SFRP1,CA9,NOL3,AQP1,COX4I2,MGARP,ENO1,POLR2A,HYOU1,RORA,BNIP3,EGLN1,STC2,PGK1,ICAM1,PICK1,ERO1A,FOXO1,AK4,HMOX1,PSMD2,USP19,UBC,AIFM1,SLC9A1,BNIP3L,NPEPPS,PINK1,EGR1,EPAS1,ATP7A,ATP6AP1,PSMD3,FAM162A,PDK1,ATP6V1A,ENDOG,TMBIM6,DNM1L,PLK3,CPEB4
GO:BP	mRNA processing	GO:0006397	0.00919847	2.03628	517	1660	80	17847	RBM38,APP,NOL3,AHCYL1,RBM15B,PRPF40B,CCAR2,POLR2A,EFTUD2,SNRNP200,CPSF1,AKAP8L,TUT1,ERCC2,HNRNPL,KHDRBS2,SNRPN,SRRT,PHRF1,SETX,TBRG4,PRPF3,PRMT7,KDM1A,RBBP6,HNRNPU,CMTR1,JMJD6,PRPF6,ESRP2,FXR2,ZCCHC8,RNF40,SNRNP70,ERCC3,DDX41,PRPF8,SART3,DHX38,GTF2F1,PTBP1,DHX16,HNRNPK,DHX9,CTR9,CSTF1,SF3A2,PAN2,CIRBP,GPKOW,POLR2B,PUF60,SRSF2,THRAP3,ECD,FIP1L1,FUS,SON,HNRNPA0,ADAR,RNMT,SF1,USP4,RBM39,TRUB2,DDX17,…
GO:BP	regulation of autophagy	GO:0010506	0.0092243	2.03507	331	1660	57	17847	SH3BP4,SREBF1,ATP6V0E2,UBQLN2,OSBPL7,HK2,EIF4G1,WDR6,USP10,ABL1,BNIP3,PIP4K2C,ATG13,EPM2A,TBC1D12,ATP6V0A1,ITPR1,TPCN1,FOXO1,MUL1,GAPDH,EXOC7,MFN2,SNRNP70,PIK3R2,RPTOR,PSAP,HMOX1,NRBP2,VDAC1,SPTLC1,PIM2,MTM1,BNIP3L,NPRL2,KLHL22,CALCOCO2,KAT5,MFSD8,PINK1,AMBRA1,RASIP1,SREBF2,ATP6V1H,MLST8,MTMR3,HTRA2,ATP6V1A,NPC1,STAT3,RRAGA,DAPK1,DNM1L,PTK2,PLK3,VPS13D,PIKFYVE
GO:BP	protein targeting to mitochondrion	GO:0006626	0.0103359	1.98565	101	1660	25	17847	SREBF1,MGARP,UQCRC2,ATG13,VPS11,HSPA4,AGK,TOMM20,MFN2,HUWE1,RNF31,HSPD1,MIPEP,PITRM1,BNIP3L,BAP1,NPEPPS,PINK1,TIMM23B,SREBF2,CHCHD4,HTRA2,TIMM21,ARIH2,SLC25A6
GO:BP	intrinsic apoptotic signaling pathway in response to hypoxia	GO:1990144	0.010346	1.98523	7	1660	6	17847	NOL3,ENO1,HYOU1,BNIP3,PINK1,TMBIM6
GO:BP	pyruvate metabolic process	GO:0006090	0.0103569	1.98477	154	1660	33	17847	APP,DDIT4,ENO2,PFKP,PFKM,PFKFB4,GPI,ENO1,PDHX,HK2,PKM,DLAT,HK1,PGAM1,NUP58,PGK1,OGDH,GAPDH,SLC16A3,PC,PDHA1,PFKFB3,TPI1,VDAC1,DLD,SLC16A1,LDHB,ZBTB20,PGM1,ECD,PDK1,STAT3,NUP93
GO:BP	cellular response to topologically incorrect protein	GO:0035967	0.0104785	1.9797	161	1660	34	17847	HSPA5,CTH,WFS1,TSPYL2,ANKZF1,HSPA1B,HYOU1,HERPUD1,AMFR,HSPA1A,KLHL15,HSPA9,STC2,SRPRA,ERO1A,ACADVL,VCP,DNAJB9,PPP1R15B,KDELR3,MBTPS2,HERPUD2,CDK5RAP3,SHC1,BAK1,CUL7,NCK2,EIF2AK3,PIK3R1,CANX,TMBIM6,ASNS,HSP90B1,HDGF
GO:BP	negative regulation of intracellular signal transduction	GO:1902532	0.0106239	1.97372	544	1660	83	17847	SH3BP4,DDIT4,MYOC,SFRP1,WFS1,NOL3,ERRFI1,NDRG2,BDKRB2,APLP1,TSPAN6,TRAP1,NR1D1,PIK3IP1,PER1,HOMER2,SORL1,SEC14L1,EFNA1,ENO1,CCAR2,GPD1L,CGNL1,HYOU1,HERPUD1,USP10,RORA,ABL1,DUSP1,PRKCD,NFKBID,HSPA1A,RAPGEF1,DUSP16,ITPR1,KDM1A,FOXO1,LZTR1,MUL1,HDAC1,EMILIN1,SIRT3,TMEM127,RANBP9,PDCD4,MFN2,GSTM2,DUSP6,PIK3R2,BAG5,DUSP5,DEPTOR,PPP2R1A,QARS,TKFC,SPRY4,TNFAIP1,CPNE1,MTM1,NPRL2,RASSF2,STMN3,MARK3,MYADM,…
GO:BP	lipid modification	GO:0030258	0.0125353	1.90187	242	1660	45	17847	PIP5K1B,ABCG1,SYNJ1,ACADS,MTMR4,PI4KA,HADH,EPHX2,CPT1C,PIP4K2C,POR,CERK,HSD17B4,ACAD10,IP6K1,ACADVL,AUH,PIP5K1A,IVD,AGK,ECHDC2,PIK3R2,ETFB,ACAT1,MTMR6,MTM1,PLPP3,HADHB,ECI1,ACADM,SLC25A17,PIP5K1C,IP6K2,PIK3CD,ABCD3,ETFDH,CRAT,TTC7B,CYGB,PIK3R1,PI4KB,MTMR3,ACOX2,HADHA,PIKFYVE
GO:BP	phosphatidylinositol biosynthetic process	GO:0006661	0.0127552	1.89431	115	1660	27	17847	PITPNM1,PIP5K1B,CDS1,SYNJ1,MTMR4,PI4KA,PLCG2,PIP4K2C,PIGL,PIGG,INPP4B,PIP5K1A,PIK3R2,MTMR12,PIGO,PIGH,MTMR6,MTM1,SBF1,PIP5K1C,PIK3CD,PIGQ,PIK3R1,PI4KB,MTMR3,GPAA1,PIKFYVE
GO:BP	response to peptide hormone	GO:0043434	0.0128127	1.89236	447	1660	71	17847	CA2,SLC2A1,ESRRA,NR4A1,TGFBR3,ERRFI1,GOT1,AHCYL1,SREBF1,GRB10,SORBS1,SORL1,GHR,PRKAR1A,JUND,PRKCZ,HADH,MGARP,ATP6V0E2,MARS,ADCY3,PKM,PRKCD,CRY2,GOT2,HDAC5,RANGAP1,POR,CYP11A1,TGFB1,CRY1,STC2,TBC1D4,PTPRA,ATP6V0A1,ICAM1,SCAP,CYC1,GCLC,BCAR1,ADCY7,FOXO1,EIF2B5,PRKCB,WDTC1,RNF40,PIK3R2,CDKN1B,TRIM16,SLC9A1,BTG2,GNAS,QDPR,SYAP1,EGR1,LPIN1,SHC1,ATP6AP1,PXN,GJA1,GPER1,ATP6V1H,PIK3R1,ATP6V1A,NFKB1,VAMP2…
GO:BP	protein catabolic process	GO:0030163	0.0131484	1.88113	956	1660	130	17847	DDB1,HSPA5,TRIB2,PLEKHG5,WFS1,PACSIN3,LDLR,NR1D1,ABHD17C,TMEM129,WWP2,RNF123,EGFR,SORL1,NFE2L1,ANKZF1,TOPORS,EFNA1,UBA1,CCAR2,USP11,UBQLN2,RNF150,OSBPL7,GPC1,ZER1,HSPA1B,RAB26,HERPUD1,TRPC4AP,USP10,AMFR,FZR1,BNIP3,MYLIP,MAP1A,ABHD17B,HSPA1A,UBE2H,KLHL15,FBXO44,AP2A1,SMAD7,CAPN2,EPM2A,CUL4B,GCLC,RNF6,UBE2O,RSPRY1,LRIG2,VCP,RBBP6,DNAJB9,FOXO1,CCDC47,VPS11,SNX33,SGSH,HGS,HECTD3,HUWE1,RNF40,SNRNP70,C…
GO:BP	protein localization to mitochondrion	GO:0070585	0.0133962	1.87302	142	1660	31	17847	SREBF1,MGARP,HK2,MOAP1,HK1,UQCRC2,ATG13,VPS11,HSPA4,AGK,TOMM20,MFN2,HUWE1,RNF31,HSPD1,MIPEP,PITRM1,TP53BP2,BNIP3L,BAP1,NPEPPS,PINK1,TFDP1,TIMM23B,SREBF2,CHCHD4,HTRA2,DNM1L,TIMM21,ARIH2,SLC25A6
GO:BP	endoplasmic reticulum unfolded protein response	GO:0030968	0.0137281	1.86239	122	1660	28	17847	HSPA5,CTH,WFS1,TSPYL2,HYOU1,HERPUD1,AMFR,STC2,SRPRA,ERO1A,ACADVL,VCP,DNAJB9,PPP1R15B,KDELR3,MBTPS2,HERPUD2,CDK5RAP3,SHC1,BAK1,CUL7,NCK2,EIF2AK3,PIK3R1,CANX,ASNS,HSP90B1,HDGF
GO:BP	regulation of programmed cell death	GO:0043067	0.013877	1.8577	1638	1660	204	17847	PLK5,DDB1,ITM2C,COL4A3,HSPA5,EGLN3,IL20RA,NDNF,ALX4,CD248,NR4A1,SFRP1,DHCR24,PLEKHG5,CTH,NOG,WFS1,MAP3K12,NOL3,BDKRB2,CX3CL1,ALDH1A2,AQP1,TRAP1,DNM2,ARHGEF3,FGFR2,WWOX,EGFR,PLCG2,TOPORS,PRKCZ,EFNA1,GPI,LANCL1,MYBBP1A,ITPKB,ENO1,CCAR2,NNT,HSPA1B,HYOU1,BHLHB9,NFATC4,HERPUD1,MOAP1,NSMF,ABL1,DUSP1,BNIP3,PRKCD,NFKBID,NQO1,STXBP1,JUN,ITPRIP,GLS2,POR,HSPA1A,BEX2,TGFB1,NFKBIA,SLC25A4,HSPA9,MADD,UNC13B,PD…
GO:BP	regulation of apoptotic process	GO:0042981	0.0139949	1.85403	1610	1660	201	17847	PLK5,DDB1,ITM2C,COL4A3,HSPA5,EGLN3,IL20RA,NDNF,ALX4,CD248,NR4A1,SFRP1,DHCR24,PLEKHG5,CTH,NOG,WFS1,MAP3K12,NOL3,BDKRB2,CX3CL1,ALDH1A2,AQP1,TRAP1,DNM2,ARHGEF3,FGFR2,WWOX,EGFR,TOPORS,PRKCZ,EFNA1,GPI,LANCL1,MYBBP1A,ITPKB,ENO1,CCAR2,NNT,HSPA1B,HYOU1,BHLHB9,NFATC4,HERPUD1,MOAP1,NSMF,ABL1,DUSP1,BNIP3,PRKCD,NFKBID,NQO1,STXBP1,JUN,ITPRIP,GLS2,POR,HSPA1A,BEX2,TGFB1,NFKBIA,HSPA9,MADD,UNC13B,PDGFRB,CAPN2,TRI…
GO:BP	glucose 6-phosphate metabolic process	GO:0051156	0.0141833	1.84822	25	1660	11	17847	SHPK,NFE2L1,GPI,HK2,TKT,HK1,PGAM1,G6PD,PGM2,PGD,G6PC3
GO:BP	fatty acid beta-oxidation	GO:0006635	0.014389	1.84197	72	1660	20	17847	ACADS,HADH,CPT1C,HSD17B4,ACAD10,ACADVL,AUH,IVD,ECHDC2,ETFB,ACAT1,HADHB,ECI1,ACADM,SLC25A17,ABCD3,ETFDH,CRAT,ACOX2,HADHA
GO:BP	glycerophospholipid metabolic process	GO:0006650	0.0143991	1.84167	320	1660	55	17847	ETNPPL,PITPNM1,PIP5K1B,ACHE,LDLR,CDS1,CHKA,ALDH5A1,SYNJ1,SCARB1,MTMR4,PI4KA,PLCG2,GPD1L,SERINC2,ETNK2,PTDSS1,PIP4K2C,PIGL,PIGG,PDGFRB,CAPN2,ENPP6,PNPLA6,IP6K1,PLCD4,INPP4B,PIP5K1A,AGK,PIK3R2,MTMR12,CPNE1,PIGO,PIGH,MTMR6,MTM1,HADHB,SBF1,PIP5K1C,IP6K2,ACSL3,LPIN1,ABHD4,PIK3CD,PIGQ,TTC7B,MBOAT2,SERINC1,PLA2G4A,PIK3R1,PI4KB,MTMR3,GPAA1,HADHA,PIKFYVE
GO:BP	organic hydroxy compound biosynthetic process	GO:1901617	0.0145225	1.83796	266	1660	48	17847	SCD,ADCYAP1R1,PLCE1,DHCR24,ABCG1,GOT1,NR1D1,ISYNA1,SREBF1,PLCH1,INSIG1,CYP39A1,PLCG2,ITPKB,DHCR7,OSBPL7,PMEL,FAXDC2,POR,PLCD3,HSD17B4,SCAP,IP6K1,PLCD4,G6PD,FASN,MBTPS2,CLCN2,WNT4,SPTLC1,QDPR,MSMO1,SQLE,HMGCR,IP6K2,AKR1B1,OSBPL2,PER2,CYP51A1,GPER1,SREBF2,NFKB1,SEC14L2,HMGCS1,CYB5R1,PLCB4,ACOX2,FDFT1
GO:BP	cellular response to external stimulus	GO:0071496	0.0147832	1.83023	336	1660	57	17847	HSPA5,SLC2A1,ATP1A1,SFRP1,GOT1,AQP1,SREBF1,EGFR,MYBBP1A,KLF10,PDXP,GLUL,EIF4G1,MARS,BNIP3,JUN,TGFB1,SLC38A2,WDR59,ICAM1,GCLC,ASGR1,PICK1,FOXO1,TNFRSF10B,MAP2K4,MIOS,IRF1,FOS,RPTOR,HMOX1,LAMP2,WNT4,NCOA1,AIFM1,ITGA6,SLC9A1,NPRL2,F11R,AMBRA1,MAP1LC3B,BAK1,GABARAPL1,MED1,GJA1,WDR45B,SREBF2,EIF2AK3,MTMR3,NFKB1,ASNS,TXN2,HSP90B1,RRAGA,TNKS,DNM1L,CPEB4
GO:BP	response to peptide	GO:1901652	0.0149905	1.82418	532	1660	81	17847	CA2,APP,SLC2A1,ESRRA,NR4A1,TGFBR3,ERRFI1,GOT1,AHCYL1,SREBF1,GRB10,SORBS1,SORL1,GHR,PRKAR1A,JUND,PRKCZ,HADH,KLF10,MGARP,ATP6V0E2,MARS,ADCY3,PKM,PRKCD,CRY2,GOT2,HDAC5,RANGAP1,POR,CYP11A1,TGFB1,CRY1,NFKBIA,STC2,TBC1D4,PTPRA,ATP6V0A1,ICAM1,SCAP,CYC1,GCLC,BCAR1,ADCY7,FOXO1,EIF2B5,PRKCB,WDTC1,RNF40,PIK3R2,CDKN1B,TRIM16,SLC9A1,BTG2,GNAS,QDPR,SYAP1,EGR1,DNM1,LPIN1,CACNB1,AKR1B1,KLF11,SHC1,ATP6AP1,PXN,GJA…
GO:BP	cellular response to organic cyclic compound	GO:0071407	0.0163893	1.78544	618	1660	91	17847	APP,HSPA5,DDIT4,STC1,ATP1A1,ESRRA,NR4A1,SFRP1,RORC,ERRFI1,PPP5C,APLP1,AQP1,NR1D1,DNM2,PPARGC1B,PDE4B,PER1,INSIG1,EGFR,NFE2L1,PDXP,MGARP,OSBPL7,JUP,ADCY3,PAQR7,GNA14,NFATC4,RORA,ABL1,CRY2,IFIT1,RAPGEF1,TGFB1,CRY1,TRIM68,ICAM1,GCLC,KDM1A,RNF6,AKAP13,FOXO1,CALCOCO1,SPIDR,AACS,RAPGEF3,MUL1,HDAC1,HNRNPU,TMEM38A,NCSTN,GSTM2,CDKN1B,NR1D2,RARB,THRA,GNB5,NCOA1,ZFP36,ESRRG,DHX9,COLEC12,AIFM1,SLC16A1,ITGA6,…
GO:BP	nervous system development	GO:0007399	0.0170151	1.76917	2400	1660	283	17847	PLK5,ALCAM,ITM2C,APP,HSPA5,DDIT4,SDHA,PTPRM,SLC2A1,LZTS3,CA10,DDR1,PITPNM1,CAMSAP3,NDNF,MYOC,CDH23,CRTAC1,SFRP1,WLS,MYH10,EDN3,ERBB2,SUN1,ACHE,LAMB1,NOG,SLC9A6,NDRG2,EPHB1,CX3CL1,ALDH1A2,APLP1,SULF2,PCDHB13,AQP1,LDLR,NR1D1,ALDH5A1,DNM2,GRB7,DCC,SYNJ1,NLGN4Y,DHX30,GRB10,FGFR2,MMP24,MYO7A,BOC,EGFR,SORL1,NFE2L1,SEMA6D,TOPORS,PRKCZ,EFNA1,LRIG1,TBX2,PRKCSH,CRB2,HDAC11,GPC1,EIF4G1,WNT5B,SERPINI1,PITX1,…
GO:BP	regulation of steroid biosynthetic process	GO:0050810	0.0170312	1.76876	91	1660	23	17847	SCD,ATP1A1,ABCG1,NR1D1,SREBF1,INSIG1,DHCR7,POR,SCAP,FASN,MBTPS2,CLCN2,WNT4,SQLE,HMGCR,EGR1,CYP51A1,SREBF2,SF1,NFKB1,SEC14L2,HMGCS1,FDFT1
GO:BP	negative regulation of hypoxia-induced intrinsic apoptotic signaling pathway	GO:1903298	0.0173093	1.76172	5	1660	5	17847	NOL3,ENO1,HYOU1,PINK1,TMBIM6
GO:BP	regulation of hypoxia-induced intrinsic apoptotic signaling pathway	GO:1903297	0.0173093	1.76172	5	1660	5	17847	NOL3,ENO1,HYOU1,PINK1,TMBIM6
GO:BP	response to hypoxia	GO:0001666	0.0179937	1.74488	362	1660	60	17847	HILPDA,DDIT4,STC1,EGLN3,SLC2A1,NDNF,SFRP1,TGFBR3,CA9,NOL3,AQP1,PLOD1,COX4I2,ATP1B1,MGARP,ENO1,HK2,HYOU1,PKM,RORA,BNIP3,ERCC2,EGLN1,TGFB1,STC2,CAPN2,PGK1,ICAM1,SCAP,ITPR1,ERO1A,ERCC3,AK4,CDKN1B,HMOX1,TM9SF4,PSMD2,XRCC1,USP19,UBC,SLC9A1,BNIP3L,ACTN4,SLC11A2,NPEPPS,AHCY,PINK1,EGR1,EPAS1,ATP7A,PSMD3,FAM162A,PDK1,CYGB,ENDOG,TMBIM6,TXN2,HSP90B1,DNM1L,PLK3
GO:BP	myeloid cell homeostasis	GO:0002262	0.0183962	1.73527	151	1660	32	17847	TGFBR3,PDE4B,NFE2L1,GPI,ITPKB,HSPA1B,ERCC2,HSPA1A,HSPA9,SLC37A4,JAM3,G6PD,JMJD6,P4HTM,NCSTN,HMOX1,THRA,MAEA,ZFP36,BAP1,LDB1,SLC11A2,DNASE2,MTHFD1,EPAS1,PIK3CD,BAK1,MED1,BCL6,ADAR,FAM210B,STAT3
GO:BP	regulation of signal transduction	GO:0009966	0.0184241	1.73461	3209	1660	365	17847	FAM110C,ITM2C,APP,AFAP1L2,SH3BP4,HSPA5,DDIT4,ADCYAP1R1,IL20RA,FRMPD1,TRIB2,MYOC,SFRP1,PLCE1,WLS,TGFBR3,FGF7,TOB1,LDLRAP1,EDN3,PIP5K1B,ERBB2,PLEKHG5,FAM13A,CTH,NOG,WFS1,MAP3K12,LEMD3,SLC9A6,DKK4,NOL3,ERRFI1,NDRG2,GOT1,EPHB1,PPP5C,BDKRB2,CX3CL1,APLP1,SULF2,TSPAN6,TRAP1,NR1D1,DNM2,GRB7,DCC,ARHGEF3,RGS5,TSPYL2,GRB10,MCF2L2,PIK3IP1,FGFR2,WWP2,PER1,WWOX,EPS8L2,AXIN2,SORBS1,HOMER2,INSIG1,EGFR,SORL1,MTMR…
GO:BP	regulation of biological quality	GO:0065008	0.0189065	1.72339	4103	1660	454	17847	TMOD1,SCNN1A,DDB1,HILPDA,SLCO4A1,RBM38,CA2,APP,HSPA5,SCD,STC1,ADCYAP1R1,ACOT11,CA12,PTPRM,SLC2A1,LZTS3,ATP1A1,DDR1,IL20RA,BAIAP3,MYOC,CDH23,SLC4A3,SFRP1,PLCE1,SLC29A1,TGFBR3,MYH10,LDLRAP1,EDN3,SUN1,ACHE,SLC9A7,SYTL4,VAMP1,ABCG1,WFS1,SLC9A6,NOL3,GOT1,NDUFS1,EPHB1,BDKRB2,CX3CL1,ALDH1A2,CXADR,AQP1,LDLR,SLC4A4,CHKA,NR1D1,PFKM,ALDH5A1,DNM2,DCC,ABHD17C,SYNJ1,PPARGC1B,SREBF1,TXNDC11,SYT11,GRB10,SLC4A2,P…
GO:BP	regulation of molecular function	GO:0065009	0.0197578	1.70426	3013	1660	345	17847	APP,COL4A3,AFAP1L2,SH3BP4,HSPA5,PBXIP1,ADCYAP1R1,EGLN3,CAMSAP3,TRIB2,CRTAC1,SPON1,NR4A1,CPAMD8,SFRP1,PLCE1,TGFBR3,DHCR24,LDLRAP1,EDN3,ERBB2,FAM13A,CTH,NOG,WFS1,MAP3K12,DKK4,NOL3,ERRFI1,CX3CL1,AQP1,NEDD9,AHCYL1,DNM2,PPARGC1B,RGS5,TSPYL2,PIK3IP1,PDE4B,FGFR2,RIPK4,CEP85,WWP2,MMP24,SCARB1,EGFR,SORL1,ATP1B2,GHR,PRKAR1A,PLCG2,TOPORS,PRKCZ,EFNA1,GPI,ATP1B1,DYNC1I1,ASAP3,CCAR2,CRB2,GPD1L,JUP,STIM1,GPRC5C…
GO:BP	establishment of protein localization to mitochondrion	GO:0072655	0.0206308	1.68548	138	1660	30	17847	SREBF1,MGARP,HK2,MOAP1,HK1,UQCRC2,ATG13,VPS11,HSPA4,AGK,TOMM20,MFN2,HUWE1,RNF31,HSPD1,MIPEP,PITRM1,TP53BP2,BNIP3L,BAP1,NPEPPS,PINK1,TFDP1,TIMM23B,SREBF2,CHCHD4,HTRA2,TIMM21,ARIH2,SLC25A6
GO:BP	process utilizing autophagic mechanism	GO:0061919	0.0223425	1.65087	504	1660	77	17847	SH3BP4,SREBF1,ATP6V0E2,UBQLN2,OSBPL7,HK2,EIF4G1,WDR6,ATG9A,USP10,ABL1,BNIP3,PIP4K2C,ATG13,EPM2A,TBC1D12,ATP6V0A1,ITPR1,VPS39,VCP,TPCN1,FOXO1,MUL1,VPS11,GAPDH,EXOC7,HGS,TOMM20,MFN2,SNRNP70,PIK3R2,RPTOR,PSAP,HMOX1,NRBP2,VPS51,VPS37B,LAMP2,TM9SF1,VDAC1,SPTLC1,PIM2,SNAP29,MTM1,BNIP3L,NPRL2,KLHL22,CALCOCO2,FNBP1L,KAT5,MFSD8,PINK1,ITGB4,AMBRA1,MAP1LC3B,GABARAPL1,SNX14,WDR45B,RASIP1,SREBF2,ATP6V1H,VPS33…
GO:BP	autophagy	GO:0006914	0.0223425	1.65087	504	1660	77	17847	SH3BP4,SREBF1,ATP6V0E2,UBQLN2,OSBPL7,HK2,EIF4G1,WDR6,ATG9A,USP10,ABL1,BNIP3,PIP4K2C,ATG13,EPM2A,TBC1D12,ATP6V0A1,ITPR1,VPS39,VCP,TPCN1,FOXO1,MUL1,VPS11,GAPDH,EXOC7,HGS,TOMM20,MFN2,SNRNP70,PIK3R2,RPTOR,PSAP,HMOX1,NRBP2,VPS51,VPS37B,LAMP2,TM9SF1,VDAC1,SPTLC1,PIM2,SNAP29,MTM1,BNIP3L,NPRL2,KLHL22,CALCOCO2,FNBP1L,KAT5,MFSD8,PINK1,ITGB4,AMBRA1,MAP1LC3B,GABARAPL1,SNX14,WDR45B,RASIP1,SREBF2,ATP6V1H,VPS33…
GO:BP	sterol biosynthetic process	GO:0016126	0.0224313	1.64914	80	1660	21	17847	SCD,DHCR24,ABCG1,SREBF1,INSIG1,DHCR7,FAXDC2,POR,SCAP,G6PD,FASN,MBTPS2,MSMO1,SQLE,HMGCR,CYP51A1,SREBF2,SEC14L2,HMGCS1,CYB5R1,FDFT1
GO:BP	positive regulation of metabolic process	GO:0009893	0.0226285	1.64535	3676	1660	411	17847	DDB1,RBM38,APP,COL4A3,AFAP1L2,SH3BP4,HSPA5,SCD,ADCYAP1R1,EGLN3,TRIB2,SUCO,ALX4,ESRRA,SPON1,NR4A1,SFRP1,RORC,PLCE1,FGF7,TOB1,LDLRAP1,EDN3,ERBB2,ACHE,ABCG1,NOG,WFS1,MAP3K12,PACSIN3,CX3CL1,ALDH1A2,LDLR,NEDD9,NR1D1,PFKM,PFKFB4,DNM2,PPARGC1B,SREBF1,GRB10,SETD3,FGFR2,WWP2,PER1,WWOX,SCARB1,AXIN2,ZNF821,PXYLP1,SORBS1,INSIG1,EGFR,SORL1,DBP,GHR,PRKAR1A,NFE2L1,MYH9,GLIS1,PLCG2,JUND,MICAL2,TOPORS,PRKCZ,HADH,…
GO:BP	organelle disassembly	GO:1903008	0.02348	1.6293	99	1660	24	17847	SREBF1,GFM2,HK2,ATG9A,BNIP3,MRRF,ATG13,VCP,MUL1,MFN2,VDAC1,BNIP3L,PINK1,AMBRA1,MAP1LC3B,GABARAPL1,WDR45B,SREBF2,HTRA2,KLC1,DNM1L,PLK3,GBF1,VPS13D
GO:BP	liver development	GO:0001889	0.0240029	1.61974	139	1660	30	17847	TGFBR3,ALDH1A2,SULF2,ACO2,EGFR,DBP,PRKCSH,PKM,HES1,JUN,TGFB1,GLI3,TGFA,AACS,AK4,HMOX1,RARB,WNT4,ACAT1,LSR,RARA,QDPR,ACADM,IGF2R,ATP7A,MED1,TNFAIP3,ASNS,HMGCS1,PRMT5
GO:BP	regulation of sterol biosynthetic process	GO:0106118	0.0250716	1.60082	46	1660	15	17847	SCD,ABCG1,SREBF1,DHCR7,POR,SCAP,FASN,MBTPS2,SQLE,HMGCR,CYP51A1,SREBF2,SEC14L2,HMGCS1,FDFT1
GO:BP	regulation of cholesterol biosynthetic process	GO:0045540	0.0250716	1.60082	46	1660	15	17847	SCD,ABCG1,SREBF1,DHCR7,POR,SCAP,FASN,MBTPS2,SQLE,HMGCR,CYP51A1,SREBF2,SEC14L2,HMGCS1,FDFT1
GO:BP	branched-chain amino acid catabolic process	GO:0009083	0.0267614	1.57249	22	1660	10	17847	ACADSB,AUH,MCCC1,BCKDHA,IVD,ACAT1,DLD,HIBADH,HIBCH,ACAD8
GO:BP	branched-chain amino acid metabolic process	GO:0009081	0.0267614	1.57249	22	1660	10	17847	ACADSB,AUH,MCCC1,BCKDHA,IVD,ACAT1,DLD,HIBADH,HIBCH,ACAD8
GO:BP	glucose catabolic process	GO:0006007	0.0277631	1.55653	36	1660	13	17847	ENO2,PFKP,PFKM,GPI,ENO1,HK2,PKM,HK1,PGAM1,PGK1,GAPDH,TPI1,LRP5
GO:BP	response to oxidative stress	GO:0006979	0.0278798	1.55471	457	1660	71	17847	CA3,APP,DHCR24,NOL3,PPP5C,AQP1,TRAP1,DNM2,PPARGC1B,EGFR,NFE2L1,ANKZF1,LANCL1,HSPA1B,SLC23A2,ABL1,DUSP1,BNIP3,ERCC2,PRKCD,EGLN1,NQO1,JUN,HSPA1A,STC2,PDGFRB,CAPN2,SETX,GCLC,ERO1A,NEIL1,FOXO1,PPP1R15B,NAPRT,G6PD,NDUFS2,PRDX2,HYAL1,ERCC3,FOS,PSAP,BAG5,HMOX1,SIGMAR1,PTPRK,XRCC1,AIFM1,PINK1,PON2,RCAN1,EPAS1,ATP7A,PXN,RHOB,BAK1,ETFDH,PDK1,CYGB,TNFAIP3,CDK2,PSIP1,HTRA2,ENDOG,SFPQ,TXN2,ADAM9,DAPK1,ACOX2,P…
GO:BP	negative regulation of cellular metabolic process	GO:0031324	0.0282779	1.54855	2660	1660	308	17847	RBM38,ITM2C,APP,COL4A3,PBXIP1,DDIT4,ATP1A1,CAMSAP3,TRIB2,ESRRA,SPON1,NR4A1,CPAMD8,SFRP1,RORC,DHCR24,TOB1,ZNF224,NOG,WFS1,NOL3,ERRFI1,NDRG2,PPP5C,BDKRB2,AQP1,TRAP1,NR1D1,GRB7,PPARGC1B,TSPYL2,SREBF1,GRB10,PIK3IP1,FGFR2,CEP85,WWP2,PER1,WWOX,AXIN2,INSIG1,SCAF4,SORL1,PRKAR1A,GLIS1,JUND,PRKCZ,EFNA1,GPI,MYBBP1A,KLF10,TBX2,CIART,ENO1,CCAR2,UBQLN2,UPF1,CRB2,GPD1L,HK2,NNT,EIF4G1,SERPINI1,WDR6,HSPA1B,PITX1,…
GO:BP	response to nutrient levels	GO:0031667	0.0285275	1.54474	499	1660	76	17847	HSPA5,STC1,SLC2A1,SFRP1,ALDH1A2,LDLR,SREBF1,EGFR,SORL1,GHR,ADSSL1,MYBBP1A,KLF10,PDXP,SLC25A25,GLUL,NNT,EIF4G1,MARS,SLC27A4,KAT2A,PKM,NQO1,JUN,POR,TGFB1,STC2,SLC38A2,WDR59,ICAM1,GCLC,PICK1,SLC37A4,FOXO1,AACS,G6PD,CHSY1,SORD,MIOS,RPTOR,HMOX1,LAMP2,WNT4,NCOA1,ZFP36,ACAT1,AIFM1,FSTL1,SLC16A1,NPRL2,RARA,ACADM,AHCY,HMGCR,ACSL3,GSN,AMBRA1,MAP1LC3B,GABARAPL1,MED1,WDR45B,SREBF2,LRP11,EIF2AK3,MTMR3,TMBIM6,…
GO:BP	steroid biosynthetic process	GO:0006694	0.0315586	1.50088	198	1660	38	17847	SCD,ATP1A1,DHCR24,ABCG1,NR1D1,SREBF1,SCARB1,INSIG1,CYP39A1,DHCR7,OSBPL7,FAXDC2,POR,CYP11A1,HSD17B4,SCAP,DHRS11,G6PD,FASN,MBTPS2,CLCN2,WNT4,MSMO1,SQLE,HMGCR,EGR1,AKR1B1,OSBPL2,MED1,CYP51A1,SREBF2,SF1,NFKB1,SEC14L2,HMGCS1,CYB5R1,ACOX2,FDFT1
GO:BP	cholesterol metabolic process	GO:0008203	0.0325217	1.48783	148	1660	31	17847	APP,SCD,DHCR24,LDLRAP1,ABCG1,LDLR,SREBF1,SCARB1,INSIG1,CYP39A1,NFE2L1,DHCR7,EPHX2,POR,CYP11A1,LMF1,SCAP,ACADVL,G6PD,FASN,MBTPS2,MSMO1,SQLE,HMGCR,CYP51A1,SREBF2,NPC1,SEC14L2,HMGCS1,FDFT1,HDLBP
GO:BP	hexose catabolic process	GO:0019320	0.0327166	1.48523	58	1660	17	17847	ENO2,PFKP,PFKM,GPI,ENO1,HK2,PKM,HK1,PGAM1,PGK1,GAPDH,TPI1,TKFC,LRP5,PGM1,PGM2,GLB1
GO:BP	protein ubiquitination	GO:0016567	0.0342457	1.46539	840	1660	115	17847	DDB1,HSPA5,PDZRN3,MKRN3,WFS1,TMEM129,WWP2,RNF123,NFE2L1,FEM1C,TOPORS,UBA1,RNF150,HSPA1B,MARCH3,HERPUD1,TRPC4AP,ABL1,AMFR,FZR1,MYLIP,BCOR,LRRC41,HSPA1A,IRF2BPL,UBE2H,KLHL15,FBXO44,CRY1,MKRN2,TRIM68,SMAD7,EPM2A,KLHL7,CUL4B,GCLC,KDM1A,RNF6,UBE2O,RSPRY1,VCP,RBBP6,LZTR1,MUL1,WDTC1,CAND1,DCUN1D2,WSB1,HECTD3,HUWE1,RNF40,BAG5,RNF220,RNF31,PSMD2,RNF139,SHPRH,LONRF1,RMND5B,TNFAIP1,MAEA,FBXL12,FBXO38,UBC,TR…
GO:BP	cellular response to decreased oxygen levels	GO:0036294	0.0343559	1.464	221	1660	41	17847	HILPDA,STC1,EGLN3,NDNF,SFRP1,CA9,NOL3,AQP1,COX4I2,MGARP,ENO1,HYOU1,RORA,BNIP3,EGLN1,STC2,PGK1,ICAM1,PICK1,ERO1A,AK4,HMOX1,PSMD2,USP19,UBC,AIFM1,SLC9A1,BNIP3L,NPEPPS,PINK1,EGR1,EPAS1,ATP7A,PSMD3,FAM162A,PDK1,ENDOG,TMBIM6,DNM1L,PLK3,CPEB4
GO:BP	positive regulation of cellular metabolic process	GO:0031325	0.0369454	1.43244	3353	1660	377	17847	DDB1,APP,COL4A3,AFAP1L2,SH3BP4,HSPA5,ADCYAP1R1,EGLN3,TRIB2,ALX4,ESRRA,SPON1,NR4A1,SFRP1,RORC,PLCE1,FGF7,TOB1,EDN3,ERBB2,ABCG1,NOG,WFS1,MAP3K12,PACSIN3,CX3CL1,LDLR,NEDD9,NR1D1,PFKM,PFKFB4,DNM2,PPARGC1B,SREBF1,SETD3,FGFR2,WWP2,PER1,WWOX,SCARB1,AXIN2,ZNF821,PXYLP1,SORBS1,INSIG1,EGFR,DBP,GHR,PRKAR1A,NFE2L1,MYH9,GLIS1,PLCG2,JUND,MICAL2,TOPORS,PRKCZ,EFNA1,KLF10,TBX2,ING1,ENO1,POMT1,CCAR2,UBQLN2,UPF1,PO…
GO:BP	hepaticobiliary system development	GO:0061008	0.037366	1.42752	142	1660	30	17847	TGFBR3,ALDH1A2,SULF2,ACO2,EGFR,DBP,PRKCSH,PKM,HES1,JUN,TGFB1,GLI3,TGFA,AACS,AK4,HMOX1,RARB,WNT4,ACAT1,LSR,RARA,QDPR,ACADM,IGF2R,ATP7A,MED1,TNFAIP3,ASNS,HMGCS1,PRMT5
GO:BP	cellular response to nitrogen compound	GO:1901699	0.0376848	1.42383	718	1660	101	17847	COL4A6,CA2,APP,SH3BP4,HSPA5,STC1,ESRRA,NR4A1,SFRP1,ERRFI1,GOT1,APLP1,AQP1,AHCYL1,DNM2,SREBF1,GRB10,PDE4B,SORBS1,EGFR,SORL1,GHR,PRKAR1A,PRKCZ,KLF10,PDXP,MGARP,ATP6V0E2,JUP,MARS,ADCY3,GNA14,PKM,NSMF,ABL1,PRKCD,HDAC5,IFIT1,RANGAP1,POR,CYP11A1,RAPGEF1,TGFB1,CAPN2,TBC1D4,PTPRA,ATP6V0A1,ICAM1,GCLC,BCAR1,KDM1A,ADCY7,FOXO1,SPIDR,RAPGEF3,MUL1,PRKCB,WDTC1,TMEM38A,NCSTN,GSTM2,PIK3R2,RPTOR,GNB5,DHX9,COLEC12,…
GO:BP	regulation of apoptotic signaling pathway	GO:2001233	0.0395309	1.40306	412	1660	65	17847	ITM2C,IL20RA,SFRP1,CTH,NOG,WFS1,NOL3,BDKRB2,CX3CL1,TRAP1,WWOX,ENO1,CCAR2,HSPA1B,HYOU1,NFATC4,HERPUD1,MOAP1,BNIP3,PRKCD,ITPRIP,HSPA1A,MADD,ICAM1,GCLC,KDM1A,TNFRSF10B,MUL1,HDAC1,MAGED1,PRDX2,TMBIM1,BAG5,HMOX1,DEPTOR,PPP2R1A,PPP2R1B,QARS,WNT4,HNRNPK,TP53BP2,ITGA6,PINK1,PDIA3,TFDP1,GSN,FGFR1,BAK1,FAM162A,TCF7L2,FAF1,GPER1,NCK2,EIF2AK3,VDAC2,TNFAIP3,HTRA2,SFPQ,TMBIM6,NDUFS3,DNM1L,SLC25A5,BIRC6,SIAH1,D…
GO:BP	regulation of alcohol biosynthetic process	GO:1902930	0.0431772	1.36475	77	1660	20	17847	SCD,ADCYAP1R1,ABCG1,SREBF1,DHCR7,POR,SCAP,FASN,MBTPS2,CLCN2,WNT4,SQLE,HMGCR,CYP51A1,GPER1,SREBF2,NFKB1,SEC14L2,HMGCS1,FDFT1
GO:BP	cholesterol biosynthetic process	GO:0006695	0.0439964	1.35658	71	1660	19	17847	SCD,DHCR24,ABCG1,SREBF1,INSIG1,DHCR7,POR,SCAP,G6PD,FASN,MBTPS2,MSMO1,SQLE,HMGCR,CYP51A1,SREBF2,SEC14L2,HMGCS1,FDFT1
GO:BP	mitochondrial RNA metabolic process	GO:0000959	0.0448005	1.34872	48	1660	15	17847	PPARGC1B,DARS2,POLRMT,TBRG4,ELAC2,SARS2,CDK5RAP1,TRIT1,AARS,LRPPRC,TARS2,KIAA0391,SUPV3L1,EARS2,MRPL12
GO:BP	response to extracellular stimulus	GO:0009991	0.0455404	1.3416	531	1660	79	17847	HSPA5,STC1,SLC2A1,SFRP1,ALDH1A2,LDLR,SREBF1,EGFR,SORL1,GHR,ADSSL1,MYBBP1A,KLF10,PDXP,SLC25A25,GLUL,NNT,EIF4G1,MARS,SLC27A4,KAT2A,PKM,NQO1,JUN,POR,TGFB1,STC2,SLC38A2,WDR59,ICAM1,GCLC,ASGR1,PICK1,SLC37A4,FOXO1,AACS,G6PD,CHSY1,SORD,MIOS,FOS,RPTOR,HMOX1,LAMP2,WNT4,NCOA1,ZFP36,ACAT1,AIFM1,FSTL1,SLC16A1,ITGA6,NPRL2,RARA,ACADM,AHCY,HMGCR,ACSL3,GSN,AMBRA1,MAP1LC3B,GABARAPL1,MED1,WDR45B,SREBF2,LRP11,EIF2A…
GO:BP	cellular protein catabolic process	GO:0044257	0.0457838	1.33929	792	1660	109	17847	DDB1,HSPA5,TRIB2,WFS1,LDLR,NR1D1,TMEM129,WWP2,RNF123,NFE2L1,ANKZF1,TOPORS,EFNA1,UBA1,CCAR2,USP11,UBQLN2,RNF150,OSBPL7,ZER1,HSPA1B,HERPUD1,TRPC4AP,USP10,AMFR,FZR1,BNIP3,MYLIP,MAP1A,HSPA1A,UBE2H,KLHL15,FBXO44,AP2A1,SMAD7,CAPN2,EPM2A,CUL4B,GCLC,RNF6,UBE2O,RSPRY1,VCP,RBBP6,DNAJB9,CCDC47,VPS11,HECTD3,HUWE1,RNF40,BAG5,VPS37B,USP42,USP20,PSMD2,LAMP2,RNF139,RMND5B,NGLY1,USP19,TNFAIP1,MAEA,CSNK1A1,PCYOX1,…
GO:BP	sterol metabolic process	GO:0016125	0.0478626	1.32	165	1660	33	17847	APP,SCD,DHCR24,LDLRAP1,ABCG1,LDLR,SREBF1,SCARB1,INSIG1,CYP39A1,NFE2L1,DHCR7,EPHX2,FAXDC2,POR,CYP11A1,LMF1,SCAP,ACADVL,G6PD,FASN,MBTPS2,MSMO1,SQLE,HMGCR,CYP51A1,SREBF2,NPC1,SEC14L2,HMGCS1,CYB5R1,FDFT1,HDLBP
GO:BP	positive regulation of cellular process	GO:0048522	0.0485845	1.3135	5515	1660	588	17847	PLK5,DDB1,HILPDA,CA2,FAM110C,ITM2C,APP,COL4A3,AFAP1L2,SH3BP4,HSPA5,DDIT4,ADCYAP1R1,EGLN3,IL20RA,BAIAP3,TRIB2,NDNF,SUCO,MYOC,ALX4,CD248,ESRRA,SPON1,NR4A1,SFRP1,RORC,PLCE1,WLS,TGFBR3,FGF7,TOB1,MYH10,LDLRAP1,EDN3,ERBB2,ACHE,PLEKHG5,SYTL4,LAMB1,CTH,ABCG1,NOG,WFS1,MAP3K12,PACSIN3,GOT1,EPHB1,PPP5C,CX3CL1,ALDH1A2,SULF2,TSPAN6,AQP1,LDLR,NEDD9,NR1D1,PFKM,PFKFB4,DNM2,GRB7,ARHGEF3,SYNJ1,PPARGC1B,SREBF1,GRB1…
GO:BP	cellular hyperosmotic response	GO:0071474	0.0487445	1.31207	15	1660	8	17847	SLC2A1,ERRFI1,AQP1,SLC25A23,AKR1B1,XRCC6,XRCC5,MAPK10
GO:BP	cellular carbohydrate metabolic process	GO:0044262	0.049762	1.3031	286	1660	49	17847	DDB1,DDIT4,ADCYAP1R1,SLC2A1,RORC,GOT1,NR1D1,PFKM,PFKFB4,SYNJ1,ISYNA1,SORBS1,NFE2L1,HK2,KAT2A,RORA,HK1,PGAM1,CRY1,B3GNT7,ITPK1,EPM2A,GBE1,SLC37A4,GYS1,FOXO1,PYGB,MIDN,B3GNT2,SORD,PFKFB3,TPI1,TKFC,MAEA,ACADM,AKR1B1,PGM1,PER2,PDK1,GPER1,GPD2,ABHD10,FAM3A,PGM2,PGD,STAT3,GLB1,PPP1R2,SLC5A3
