# Supplementary material for: Integrated Analysis of Transcriptome and Proteome of the Human Cornea and Aqueous Humor Reveal Novel Biomarkers for Corneal Endothelial Cell Dysfunction
Source: Int J Mol Sci. 2023 Oct 19;24(20):15354. doi: 10.3390/ijms242015354 (PMC10607268; doi:10.3390/ijms242015354)
Supplement: Supplementary file 1 [file ijms-24-15354-s001.zip › Table S3.xlsx]

## Sheet: 3
Table S3. Differentially expressed proteins between corneal endothelial cell dysfunction (CECD) and control groups with fold change > 2 and p value < 0.05 in global proteome profiling.
Upregulated proteins in CECD						Downregulated proteins in CECD
Accession Number	Gene Symbol	Description	Fold change (CECD/Control)	P value	Accession Number	Gene Symbol	Description	Fold change (CECD/Control)	P value
P01036	CST4	Cystatin-S	31.8584	0.000135168	Q9UBP4	DKK3	Dickkopf-related protein 3	0.0115815	5.85531e-05
P31025	LCN1	Lipocalin-1	22.3874	0.00371506	P53674	CRYBB1	Beta-crystallin B1	0.0266105	4.62176e-05
Q86VB7	CD163	Scavenger receptor cysteine-rich type 1 protein M130;Soluble CD163	16.9144	0.036064	P00918	CA2	Carbonic anhydrase 2	0.0300742	4.82458e-05
Q06033	ITIH3	Inter-alpha-trypsin inhibitor heavy chain H3	9.56347	0.0465001	P05813	CRYBA1	Beta-crystallin A3;Beta-crystallin A3, isoform A1, Delta4 form;Beta-crystallin A3, isoform A1, Delta7 form;Beta-crystallin A3, isoform A1, Delta8 form	0.072582	7.8132e-05
Q9Y6R7	FCGBP	IgGFc-binding protein	9.04265	0.004611	P18669	PGAM1	Phosphoglycerate mutase 1	0.073606	0.000909586
P19320	VCAM1	Vascular cell adhesion protein 1	8.32847	0.00460086	P53673	CRYBA4	Beta-crystallin A4	0.0736382	0.00272538
P08670	VIM	Vimentin	6.20857	0.0490323	O60888	CUTA	Protein CutA	0.0930925	0.0200587
P20908	COL5A1	Collagen alpha-1(V) chain	6.11619	0.0246764	P15848	ARSB	Arylsulfatase B	0.0965685	0.0342883
P02489	CRYAA	Alpha-crystallin A chain;Alpha-crystallin A(1-172);Alpha-crystallin A(1-168);Alpha-crystallin A(1-162)	5.84819	0.00410284	P09972	ALDOC	Fructose-bisphosphate aldolase C	0.107614	0.0194687
O43827	ANGPTL7	Angiopoietin-related protein 7	5.63862	0.0319129	P43320	CRYBB2	Beta-crystallin B2	0.109718	1.04025e-05
Q9NZP8	C1RL	Complement C1r subcomponent-like protein	4.87341	0.000258364	Q99574	SERPINI1	Neuroserpin	0.111684	0.00630294
P02511	CRYAB	Alpha-crystallin B chain	4.69834	0.00270645	O75629	CREG1	Protein CREG1	0.129463	0.0216532
P61626	LYZ	Lysozyme C	4.53819	0.0418568	Q08629	SPOCK1	Testican-1	0.135784	0.000677111
O15031	PLXNB2	Plexin-B2	4.40241	0.0267744	Q9BRK5	SDF4	45 kDa calcium-binding protein	0.149333	0.00147546
P08697	SERPINF2	Alpha-2-antiplasmin	4.32473	9.58013e-05	P13521	SCG2	Secretogranin-2;Secretoneurin;Manserin	0.15151	0.00091469
P02746	C1QB	Complement C1q subcomponent subunit B	4.31213	0.0244377	Q14050	COL9A3	Collagen alpha-3(IX) chain	0.163953	0.00645874
P05546	SERPIND1	Heparin cofactor 2	3.92002	0.0175713	Q08380	LGALS3BP	Galectin-3-binding protein	0.164078	0.00184876
P04004	VTN	Vitronectin;Vitronectin V65 subunit;Vitronectin V10 subunit;Somatomedin-B	3.90673	0.000592454	P01860	IGHG3	Ig gamma-3 chain C region	0.166495	0.00361094
P01008	SERPINC1	Antithrombin-III	3.77659	0.000455052	P68871	HBB	Hemoglobin subunit beta	0.169731	0.000459846
P01042	KNG1	Kininogen-1;Kininogen-1 heavy chain;T-kinin;Bradykinin;Lysyl-bradykinin;Kininogen-1 light chain;Low molecular weight growth-promoting factor	3.6845	0.00811617	P40925	MDH1	Malate dehydrogenase, cytoplasmic	0.177258	0.00551114
P02749	APOH	Beta-2-glycoprotein 1	3.30392	0.00589407	Q9BZV3	IMPG2	Interphotoreceptor matrix proteoglycan 2	0.185065	0.0045083
P04217	A1BG	Alpha-1B-glycoprotein	3.27472	0.00478822	P06744	GPI	Glucose-6-phosphate isomerase	0.185572	0.00843783
P07357	C8A	Complement component C8 alpha chain	3.21481	0.00721131	P60174	TPI1	Triosephosphate isomerase	0.189283	0.000954741
Q9UGM5	FETUB	Fetuin-B	3.17093	0.0112573	Q06481	APLP2	Amyloid-like protein 2	0.192595	0.000236957
P43652	AFM	Afamin	3.15669	0.0059116	O94985	CLSTN1	Calsyntenin-1;Soluble Alc-alpha;CTF1-alpha	0.200512	0.00820236
P01011	SERPINA3	Alpha-1-antichymotrypsin;Alpha-1-antichymotrypsin His-Pro-less	3.05284	0.00160882	P02679	FGG	Fibrinogen gamma chain	0.202239	0.0101687
Q96IY4	CPB2	Carboxypeptidase B2	3.03452	0.0436502	O15240	VGF	Neurosecretory protein VGF;Neuroendocrine regulatory peptide-1;Neuroendocrine regulatory peptide-2;Antimicrobial peptide VGF[554-577]	0.209767	0.0142337
P02747	C1QC	Complement C1q subcomponent subunit C	2.98774	0.00179661	Q9BQT9	CLSTN3	Calsyntenin-3	0.216649	0.0143557
Q8TEU8	WFIKKN2	WAP, Kazal, immunoglobulin, Kunitz and NTR domain-containing protein 2	2.92038	0.00766137	P04792	HSPB1	Heat shock protein beta-1	0.217242	0.0432851
P62328	TMSB4X	Thymosin beta-4;Hematopoietic system regulatory peptide	2.85351	0.00325398	Q14393	GAS6	Growth arrest-specific protein 6	0.217607	0.000816418
P63313	TMSB10	Thymosin beta-10	2.85237	0.0199066	P32004	L1CAM	Neural cell adhesion molecule L1	0.221724	0.00119384
P02765	AHSG	Alpha-2-HS-glycoprotein;Alpha-2-HS-glycoprotein chain A;Alpha-2-HS-glycoprotein chain B	2.78121	0.00593258	P22914	CRYGS	Beta-crystallin S	0.223226	0.00475114
P07225	PROS1	Vitamin K-dependent protein S	2.77249	0.00347421	P06702	S100A9	Protein S100-A9	0.223688	0.0441892
Q9BSG5	RTBDN	Retbindin	2.69756	0.00279493	Q14563	SEMA3A	Semaphorin-3A	0.23429	0.0122457
Q9HCQ7	NPVF	Pro-FMRFamide-related neuropeptide VF;Neuropeptide NPSF;Neuropeptide RFRP-1;Neuropeptide RFRP-2;Neuropeptide NPVF	2.64255	0.0130746	P13611	VCAN	Versican core protein	0.237144	0.0131859
P02748	C9	Complement component C9;Complement component C9a;Complement component C9b	2.62645	5.36771e-05	P05067	APP	Amyloid beta A4 protein;N-APP;Soluble APP-alpha;Soluble APP-beta;C99;Beta-amyloid protein 42;Beta-amyloid protein 40;C83;P3(42);P3(40);C80;Gamma-secretase C-terminal fragment 59;Gamma-secretase C-terminal fragment 57;Gamma-secretase C-terminal fragment 50;C31	0.240263	0.0105834
P02750	LRG1	Leucine-rich alpha-2-glycoprotein	2.55251	0.00244058	P09486	SPARC	SPARC	0.241912	0.000871631
P26927	MST1	Hepatocyte growth factor-like protein	2.50554	0.0080349	Q9GZX9	TWSG1	Twisted gastrulation protein homolog 1	0.243945	0.0143564
Q14574	DSC3	Desmocollin-3	2.47616	0.0423868	P04075	ALDOA	Fructose-bisphosphate aldolase A	0.254907	0.000325497
P00736	C1R	Complement C1r subcomponent;Complement C1r subcomponent heavy chain;Complement C1r subcomponent light chain	2.41789	0.000660568	P00441	SOD1	Superoxide dismutase [Cu-Zn]	0.262597	0.0411146
P07358	C8B	Complement component C8 beta chain	2.37134	0.00117121	P69905;CON__P01966	HBA1	Hemoglobin subunit alpha	0.270778	0.0229241
P10909	CLU	Clusterin;Clusterin beta chain;Clusterin alpha chain	2.36156	0.005181	P06733	ENO1	Alpha-enolase	0.270786	0.0179173
P29279	CTGF	Connective tissue growth factor	2.27457	0.040447	Q8WY21	SORCS1	VPS10 domain-containing receptor SorCS1	0.278193	0.00579311
Q03591	CFHR1	Complement factor H-related protein 1	2.26353	0.00701201	Q10471	GALNT2	Polypeptide N-acetylgalactosaminyltransferase 2;Polypeptide N-acetylgalactosaminyltransferase 2 soluble form	0.2795	0.0392213
P00742	F10	Coagulation factor X;Factor X light chain;Factor X heavy chain;Activated factor Xa heavy chain	2.20694	0.0201107	O00468	AGRN	Agrin;Agrin N-terminal 110 kDa subunit;Agrin C-terminal 110 kDa subunit;Agrin C-terminal 90 kDa fragment;Agrin C-terminal 22 kDa fragment	0.28008	0.000154963
P01033	TIMP1	Metalloproteinase inhibitor 1	2.12419	0.0175122	Q15904	ATP6AP1	V-type proton ATPase subunit S1	0.286438	0.049466
P18065	IGFBP2	Insulin-like growth factor-binding protein 2	2.12407	0.0279215	Q9UBM4	OPTC	Opticin	0.289624	0.00525372
P00748	F12	Coagulation factor XII;Coagulation factor XIIa heavy chain;Beta-factor XIIa part 1;Coagulation factor XIIa light chain	2.10682	0.0416183	Q8N475	FSTL5	Follistatin-related protein 5	0.290727	0.0190031
Q15113	PCOLCE	Procollagen C-endopeptidase enhancer 1	2.10669	0.0158209	Q9H1Z8	C2orf40	Augurin	0.29269	0.0145825
Q14520	HABP2	Hyaluronan-binding protein 2;Hyaluronan-binding protein 2 50 kDa heavy chain;Hyaluronan-binding protein 2 50 kDa heavy chain alternate form;Hyaluronan-binding protein 2 27 kDa light chain;Hyaluronan-binding protein 2 27 kDa light chain alternate form	2.07706	0.0180451	P02671	FGA	Fibrinogen alpha chain;Fibrinopeptide A;Fibrinogen alpha chain	0.295505	0.000109616
P03973	SLPI	Antileukoproteinase	2.03882	0.00974525	O14773	TPP1	Tripeptidyl-peptidase 1	0.300484	0.0226149
					Q6MZW2	FSTL4	Follistatin-related protein 4	0.316145	0.00671824
					P04114	APOB	Apolipoprotein B-100;Apolipoprotein B-48	0.318699	0.0110063
					Q15582	TGFBI	Transforming growth factor-beta-induced protein ig-h3	0.330666	0.0196896
					O00461	GOLIM4	Golgi integral membrane protein 4	0.334874	0.00167491
					Q86Y38	XYLT1	Xylosyltransferase 1	0.335377	0.00424303
					Q9Y287	ITM2B	Integral membrane protein 2B;BRI2, membrane form;BRI2 intracellular domain;BRI2C, soluble form;Bri23 peptide	0.339213	0.0021103
					Q01469	FABP5	Fatty acid-binding protein, epidermal	0.351732	0.00846115
					P29401	TKT	Transketolase	0.360051	0.0492991
					P52803	EFNA5	Ephrin-A5	0.372551	0.0301797
					P62937	PPIA	Peptidyl-prolyl cis-trans isomerase A;Peptidyl-prolyl cis-trans isomerase A, N-terminally processed	0.373918	0.0401045
					P05408	SCG5	Neuroendocrine protein 7B2;N-terminal peptide;C-terminal peptide	0.383822	0.00529917
					Q9Y646	CPQ	Carboxypeptidase Q	0.397453	0.0166443
					P01024	C3	Complement C3;Complement C3 beta chain;C3-beta-c;Complement C3 alpha chain;C3a anaphylatoxin;Acylation stimulating protein;Complement C3b alpha chain;Complement C3c alpha chain fragment 1;Complement C3dg fragment;Complement C3g fragment;Complement C3d fragment;Complement C3f fragment;Complement C3c alpha chain fragment 2	0.426502	0.00832669
					O43505	B4GAT1	Beta-1,4-glucuronyltransferase 1	0.42868	0.00149581
					Q92859	NEO1	Neogenin	0.428855	0.015113
					P07686	HEXB	Beta-hexosaminidase subunit beta;Beta-hexosaminidase subunit beta chain B;Beta-hexosaminidase subunit beta chain A	0.4346	0.0137679
					P01871;P0DOX6	IGHM	Ig mu chain C region	0.43468	0.0215963
					P02656	APOC3	Apolipoprotein C-III	0.449391	0.0489003
					P0DP58	LYNX1	Ly-6/neurotoxin-like protein 1	0.461671	0.00982811
					P07602	PSAP	Prosaposin;Saposin-A;Saposin-B-Val;Saposin-B;Saposin-C;Saposin-D	0.464418	0.0111519
					Q13822	ENPP2	Ectonucleotide pyrophosphatase/phosphodiesterase family member 2	0.465773	0.00340754
					O75326	SEMA7A	Semaphorin-7A	0.48214	0.00992168
					P33908	MAN1A1	Mannosyl-oligosaccharide 1,2-alpha-mannosidase IA	0.48363	0.034357
					Q9BU40	CHRDL1	Chordin-like protein 1	0.486323	0.0483339
					P00740	F9	Coagulation factor IX;Coagulation factor IXa light chain;Coagulation factor IXa heavy chain	0.490113	0.0259641
					P04196	HRG	Histidine-rich glycoprotein	0.492005	0.025454
					P36955	SERPINF1	Pigment epithelium-derived factor	0.49552	0.00171926
