# Supplementary material for: Integrated Analysis of Transcriptome and Proteome of the Human Cornea and Aqueous Humor Reveal Novel Biomarkers for Corneal Endothelial Cell Dysfunction
Source: Int J Mol Sci. 2023 Oct 19;24(20):15354. doi: 10.3390/ijms242015354 (PMC10607268; doi:10.3390/ijms242015354)
Supplement: Supplementary file 1 [file ijms-24-15354-s001.zip › Table S4.xlsx]

## Sheet: 4A
Table 4. (A) Biological process of upregulated differentially expressed proteins in aqueous humor under corneal endothelial cell dysfunction.
Source	Term_name	Term_ID	Adjusted_p_value	Negative_log10_of_adjusted_p_value	Term_size	Query_size	Intersection_size	Effective_domain_size	Intersections
GO:BP	negative regulation of endopeptidase activity	GO:0010951	7.43827e-15	14.1285	252	49	16	17847	CST4,LCN1,ITIH3,CRYAB,SERPINF2,SERPIND1,VTN,SERPINC1,KNG1,FETUB,SERPINA3,WFIKKN2,AHSG,PROS1,TIMP1,SLPI
GO:BP	negative regulation of peptidase activity	GO:0010466	1.56795e-14	13.8047	264	49	16	17847	CST4,LCN1,ITIH3,CRYAB,SERPINF2,SERPIND1,VTN,SERPINC1,KNG1,FETUB,SERPINA3,WFIKKN2,AHSG,PROS1,TIMP1,SLPI
GO:BP	negative regulation of proteolysis	GO:0045861	8.5649e-14	13.0673	361	49	17	17847	CST4,LCN1,ITIH3,CRYAB,SERPINF2,SERPIND1,VTN,SERPINC1,KNG1,FETUB,SERPINA3,CPB2,WFIKKN2,AHSG,PROS1,TIMP1,SLPI
GO:BP	regulation of proteolysis	GO:0030162	3.21189e-12	11.4932	737	49	20	17847	CST4,LCN1,ITIH3,CRYAB,SERPINF2,SERPIND1,VTN,SERPINC1,KNG1,FETUB,SERPINA3,CPB2,WFIKKN2,AHSG,PROS1,CLU,TIMP1,F12,PCOLCE,SLPI
GO:BP	regulation of peptidase activity	GO:0052547	4.18049e-12	11.3788	456	49	17	17847	CST4,LCN1,ITIH3,CRYAB,SERPINF2,SERPIND1,VTN,SERPINC1,KNG1,FETUB,SERPINA3,WFIKKN2,AHSG,PROS1,TIMP1,PCOLCE,SLPI
GO:BP	regulation of endopeptidase activity	GO:0052548	3.31529e-11	10.4795	429	49	16	17847	CST4,LCN1,ITIH3,CRYAB,SERPINF2,SERPIND1,VTN,SERPINC1,KNG1,FETUB,SERPINA3,WFIKKN2,AHSG,PROS1,TIMP1,SLPI
GO:BP	platelet degranulation	GO:0002576	7.02995e-11	10.153	126	49	11	17847	ITIH3,SERPINF2,KNG1,APOH,A1BG,SERPINA3,TMSB4X,AHSG,PROS1,CLU,TIMP1
GO:BP	complement activation	GO:0006956	9.70218e-11	10.0131	178	49	12	17847	C1RL,C1QB,VTN,C8A,CPB2,C1QC,PROS1,C9,C1R,C8B,CLU,CFHR1
GO:BP	negative regulation of hydrolase activity	GO:0051346	1.15416e-10	9.93773	465	49	16	17847	CST4,LCN1,ITIH3,CRYAB,SERPINF2,SERPIND1,VTN,SERPINC1,KNG1,FETUB,SERPINA3,WFIKKN2,AHSG,PROS1,TIMP1,SLPI
GO:BP	proteolysis	GO:0006508	1.4565e-10	9.83669	1807	49	26	17847	CST4,LCN1,ITIH3,C1RL,CRYAB,SERPINF2,SERPIND1,VTN,SERPINC1,KNG1,APOH,FETUB,SERPINA3,CPB2,WFIKKN2,AHSG,PROS1,MST1,C1R,CLU,F10,TIMP1,F12,PCOLCE,HABP2,SLPI
GO:BP	regulation of complement activation	GO:0030449	7.61723e-10	9.1182	110	49	10	17847	C1QB,VTN,C8A,CPB2,C1QC,PROS1,C9,C8B,CLU,CFHR1
GO:BP	humoral immune response	GO:0006959	1.19984e-09	8.92088	362	49	14	17847	C1RL,LYZ,C1QB,VTN,C8A,CPB2,C1QC,PROS1,C9,C1R,C8B,CLU,CFHR1,SLPI
GO:BP	regulation of humoral immune response	GO:0002920	3.84539e-09	8.41506	129	49	10	17847	C1QB,VTN,C8A,CPB2,C1QC,PROS1,C9,C8B,CLU,CFHR1
GO:BP	regulation of blood coagulation	GO:0030193	8.67797e-08	7.06158	79	49	8	17847	SERPINF2,VTN,SERPINC1,KNG1,APOH,CPB2,PROS1,F12
GO:BP	regulation of hemostasis	GO:1900046	9.62246e-08	7.01671	80	49	8	17847	SERPINF2,VTN,SERPINC1,KNG1,APOH,CPB2,PROS1,F12
GO:BP	regulation of coagulation	GO:0050818	1.73983e-07	6.75949	86	49	8	17847	SERPINF2,VTN,SERPINC1,KNG1,APOH,CPB2,PROS1,F12
GO:BP	negative regulation of blood coagulation	GO:0030195	1.99211e-07	6.70069	52	49	7	17847	SERPINF2,VTN,KNG1,APOH,CPB2,PROS1,F12
GO:BP	negative regulation of hemostasis	GO:1900047	2.29053e-07	6.64006	53	49	7	17847	SERPINF2,VTN,KNG1,APOH,CPB2,PROS1,F12
GO:BP	negative regulation of coagulation	GO:0050819	4.42208e-07	6.35437	58	49	7	17847	SERPINF2,VTN,KNG1,APOH,CPB2,PROS1,F12
GO:BP	negative regulation of catalytic activity	GO:0043086	6.42067e-07	6.19242	824	49	16	17847	CST4,LCN1,ITIH3,CRYAB,SERPINF2,SERPIND1,VTN,SERPINC1,KNG1,FETUB,SERPINA3,WFIKKN2,AHSG,PROS1,TIMP1,SLPI
GO:BP	regulation of hydrolase activity	GO:0051336	9.18085e-07	6.03712	1289	49	19	17847	CST4,LCN1,ITIH3,CRYAB,PLXNB2,SERPINF2,SERPIND1,VTN,SERPINC1,KNG1,APOH,FETUB,SERPINA3,WFIKKN2,AHSG,PROS1,TIMP1,PCOLCE,SLPI
GO:BP	negative regulation of molecular function	GO:0044092	1.75716e-06	5.75519	1178	49	18	17847	CST4,LCN1,ITIH3,CRYAB,SERPINF2,SERPIND1,VTN,SERPINC1,KNG1,FETUB,SERPINA3,WFIKKN2,TMSB4X,AHSG,PROS1,CFHR1,TIMP1,SLPI
GO:BP	negative regulation of protein metabolic process	GO:0051248	1.95901e-06	5.70796	1186	49	18	17847	CST4,LCN1,ITIH3,CRYAB,SERPINF2,SERPIND1,VTN,SERPINC1,KNG1,FETUB,SERPINA3,CPB2,WFIKKN2,AHSG,PROS1,CLU,TIMP1,SLPI
GO:BP	negative regulation of wound healing	GO:0061045	3.09801e-06	5.50892	76	49	7	17847	SERPINF2,VTN,KNG1,APOH,CPB2,PROS1,F12
GO:BP	blood coagulation	GO:0007596	3.28545e-06	5.48341	339	49	11	17847	SERPINF2,SERPIND1,VTN,SERPINC1,KNG1,APOH,CPB2,PROS1,F10,F12,HABP2
GO:BP	response to stress	GO:0006950	3.6997e-06	5.43183	4085	49	31	17847	CD163,VCAM1,VIM,COL5A1,ANGPTL7,C1RL,CRYAB,LYZ,SERPINF2,C1QB,SERPIND1,VTN,SERPINC1,KNG1,APOH,C8A,SERPINA3,CPB2,C1QC,TMSB4X,AHSG,PROS1,C9,MST1,C8B,CLU,F10,TIMP1,F12,HABP2,SLPI
GO:BP	hemostasis	GO:0007599	3.83079e-06	5.41671	344	49	11	17847	SERPINF2,SERPIND1,VTN,SERPINC1,KNG1,APOH,CPB2,PROS1,F10,F12,HABP2
GO:BP	coagulation	GO:0050817	4.19569e-06	5.3772	347	49	11	17847	SERPINF2,SERPIND1,VTN,SERPINC1,KNG1,APOH,CPB2,PROS1,F10,F12,HABP2
GO:BP	immune effector process	GO:0002252	6.06962e-06	5.21684	1273	49	18	17847	C1RL,LYZ,C1QB,VTN,A1BG,C8A,SERPINA3,CPB2,C1QC,AHSG,PROS1,C9,LRG1,C1R,C8B,CLU,CFHR1,SLPI
GO:BP	negative regulation of cellular protein metabolic process	GO:0032269	6.5187e-06	5.18584	1118	49	17	17847	CST4,LCN1,ITIH3,CRYAB,SERPINF2,SERPIND1,VTN,SERPINC1,KNG1,FETUB,SERPINA3,CPB2,WFIKKN2,AHSG,PROS1,TIMP1,SLPI
GO:BP	response to external stimulus	GO:0009605	6.60641e-06	5.18003	2887	49	26	17847	VCAM1,VIM,C1RL,LYZ,PLXNB2,SERPINF2,C1QB,SERPIND1,VTN,SERPINC1,KNG1,APOH,C8A,CPB2,C1QC,TMSB4X,AHSG,PROS1,C9,LRG1,MST1,C8B,CLU,IGFBP2,F12,SLPI
GO:BP	wound healing	GO:0042060	7.08066e-06	5.14993	576	49	13	17847	COL5A1,SERPINF2,SERPIND1,VTN,SERPINC1,KNG1,APOH,CPB2,PROS1,F10,TIMP1,F12,HABP2
GO:BP	complement activation, classical pathway	GO:0006958	9.80559e-06	5.00853	142	49	8	17847	C1RL,C1QB,C8A,C1QC,C9,C1R,C8B,CLU
GO:BP	negative regulation of response to wounding	GO:1903035	1.02859e-05	4.98776	90	49	7	17847	SERPINF2,VTN,KNG1,APOH,CPB2,PROS1,F12
GO:BP	regulation of wound healing	GO:0061041	1.51181e-05	4.8205	150	49	8	17847	SERPINF2,VTN,SERPINC1,KNG1,APOH,CPB2,PROS1,F12
GO:BP	humoral immune response mediated by circulating immunoglobulin	GO:0002455	1.95736e-05	4.70833	155	49	8	17847	C1RL,C1QB,C8A,C1QC,C9,C1R,C8B,CLU
GO:BP	protein activation cascade	GO:0072376	2.12103e-05	4.67345	27	49	5	17847	SERPINC1,KNG1,APOH,F10,F12
GO:BP	blood coagulation, fibrin clot formation	GO:0072378	2.12103e-05	4.67345	27	49	5	17847	SERPINC1,KNG1,APOH,F10,F12
GO:BP	fibrinolysis	GO:0042730	2.12103e-05	4.67345	27	49	5	17847	SERPINF2,APOH,CPB2,PROS1,F12
GO:BP	defense response	GO:0006952	2.51195e-05	4.59999	1760	49	20	17847	CD163,VCAM1,VIM,C1RL,LYZ,SERPINF2,C1QB,SERPINC1,KNG1,C8A,SERPINA3,C1QC,TMSB4X,AHSG,C9,C8B,CLU,TIMP1,F12,SLPI
GO:BP	regulated exocytosis	GO:0045055	3.53759e-05	4.45129	792	49	14	17847	ITIH3,LYZ,SERPINF2,KNG1,APOH,A1BG,SERPINA3,TMSB4X,AHSG,PROS1,LRG1,CLU,TIMP1,SLPI
GO:BP	acute inflammatory response	GO:0002526	4.20366e-05	4.37637	110	49	7	17847	CD163,VCAM1,SERPINF2,SERPINC1,SERPINA3,AHSG,F12
GO:BP	response to stimulus	GO:0050896	5.54597e-05	4.25602	9379	49	44	17847	CST4,LCN1,CD163,VCAM1,VIM,COL5A1,CRYAA,ANGPTL7,C1RL,CRYAB,LYZ,PLXNB2,SERPINF2,C1QB,SERPIND1,VTN,SERPINC1,KNG1,APOH,A1BG,C8A,SERPINA3,CPB2,C1QC,WFIKKN2,TMSB4X,AHSG,PROS1,RTBDN,NPVF,C9,LRG1,MST1,C1R,C8B,CLU,CFHR1,F10,TIMP1,IGFBP2,F12,PCOLCE,HABP2,SLPI
GO:BP	response to wounding	GO:0009611	6.29395e-05	4.20108	692	49	13	17847	COL5A1,SERPINF2,SERPIND1,VTN,SERPINC1,KNG1,APOH,CPB2,PROS1,F10,TIMP1,F12,HABP2
GO:BP	regulation of response to wounding	GO:1903034	6.87881e-05	4.16249	182	49	8	17847	SERPINF2,VTN,SERPINC1,KNG1,APOH,CPB2,PROS1,F12
GO:BP	immune response	GO:0006955	7.02318e-05	4.15347	2286	49	22	17847	VCAM1,VIM,C1RL,LYZ,C1QB,VTN,SERPINC1,A1BG,C8A,SERPINA3,CPB2,C1QC,AHSG,PROS1,C9,LRG1,C1R,C8B,CLU,CFHR1,F12,SLPI
GO:BP	regulation of fibrinolysis	GO:0051917	0.000106926	3.97092	14	49	4	17847	SERPINF2,APOH,CPB2,F12
GO:BP	leukocyte mediated immunity	GO:0002443	0.00012155	3.91524	874	49	14	17847	C1RL,LYZ,C1QB,A1BG,C8A,SERPINA3,C1QC,AHSG,C9,LRG1,C1R,C8B,CLU,SLPI
GO:BP	cytolysis	GO:0019835	0.000168319	3.77387	40	49	5	17847	LYZ,C8A,C9,C8B,CFHR1
GO:BP	exocytosis	GO:0006887	0.000189899	3.72148	906	49	14	17847	ITIH3,LYZ,SERPINF2,KNG1,APOH,A1BG,SERPINA3,TMSB4X,AHSG,PROS1,LRG1,CLU,TIMP1,SLPI
GO:BP	regulation of body fluid levels	GO:0050878	0.000196049	3.70763	504	49	11	17847	SERPINF2,SERPIND1,VTN,SERPINC1,KNG1,APOH,CPB2,PROS1,F10,F12,HABP2
GO:BP	immunoglobulin mediated immune response	GO:0016064	0.000319466	3.49558	222	49	8	17847	C1RL,C1QB,C8A,C1QC,C9,C1R,C8B,CLU
GO:BP	blood coagulation, intrinsic pathway	GO:0007597	0.000324239	3.48913	18	49	4	17847	SERPINC1,KNG1,APOH,F12
GO:BP	B cell mediated immunity	GO:0019724	0.000354103	3.45087	225	49	8	17847	C1RL,C1QB,C8A,C1QC,C9,C1R,C8B,CLU
GO:BP	regulation of immune effector process	GO:0002697	0.000668319	3.17502	448	49	10	17847	C1QB,VTN,C8A,CPB2,C1QC,PROS1,C9,C8B,CLU,CFHR1
GO:BP	zymogen activation	GO:0031638	0.000786015	3.10457	54	49	5	17847	C1RL,SERPINF2,APOH,CPB2,F12
GO:BP	activation of immune response	GO:0002253	0.000913948	3.03908	724	49	12	17847	C1RL,C1QB,VTN,C8A,CPB2,C1QC,PROS1,C9,C1R,C8B,CLU,CFHR1
GO:BP	plasminogen activation	GO:0031639	0.00132159	2.8789	25	49	4	17847	SERPINF2,APOH,CPB2,F12
GO:BP	regulation of cellular protein metabolic process	GO:0032268	0.00138179	2.85956	2698	49	22	17847	CST4,LCN1,ITIH3,VIM,CRYAB,PLXNB2,SERPINF2,SERPIND1,VTN,SERPINC1,KNG1,FETUB,SERPINA3,CPB2,WFIKKN2,AHSG,PROS1,CLU,TIMP1,F12,PCOLCE,SLPI
GO:BP	immune system process	GO:0002376	0.00158722	2.79936	3214	49	24	17847	VCAM1,VIM,C1RL,LYZ,C1QB,VTN,SERPINC1,A1BG,C8A,SERPINA3,CPB2,C1QC,AHSG,PROS1,C9,LRG1,MST1,C1R,C8B,CLU,CFHR1,IGFBP2,F12,SLPI
GO:BP	inflammatory response	GO:0006954	0.0016406	2.785	765	49	12	17847	CD163,VCAM1,LYZ,SERPINF2,SERPINC1,KNG1,SERPINA3,TMSB4X,AHSG,CLU,TIMP1,F12
GO:BP	positive regulation of wound healing	GO:0090303	0.00171493	2.76575	63	49	5	17847	SERPINF2,VTN,APOH,CPB2,F12
GO:BP	positive regulation of hemostasis	GO:1900048	0.00182613	2.73847	27	49	4	17847	SERPINF2,APOH,CPB2,F12
GO:BP	positive regulation of blood coagulation	GO:0030194	0.00182613	2.73847	27	49	4	17847	SERPINF2,APOH,CPB2,F12
GO:BP	positive regulation of coagulation	GO:0050820	0.00212619	2.6724	28	49	4	17847	SERPINF2,APOH,CPB2,F12
GO:BP	secretion	GO:0046903	0.00261637	2.5823	1686	49	17	17847	ITIH3,LYZ,SERPINF2,SERPINC1,KNG1,APOH,A1BG,SERPINA3,CPB2,TMSB4X,AHSG,PROS1,NPVF,LRG1,CLU,TIMP1,SLPI
GO:BP	regulation of catalytic activity	GO:0050790	0.00279328	2.55389	2338	49	20	17847	CST4,LCN1,ITIH3,CRYAB,PLXNB2,SERPINF2,SERPIND1,VTN,SERPINC1,KNG1,APOH,FETUB,SERPINA3,WFIKKN2,AHSG,PROS1,CLU,TIMP1,PCOLCE,SLPI
GO:BP	regulation of protein metabolic process	GO:0051246	0.00405062	2.39248	2870	49	22	17847	CST4,LCN1,ITIH3,VIM,CRYAB,PLXNB2,SERPINF2,SERPIND1,VTN,SERPINC1,KNG1,FETUB,SERPINA3,CPB2,WFIKKN2,AHSG,PROS1,CLU,TIMP1,F12,PCOLCE,SLPI
GO:BP	secretion by cell	GO:0032940	0.00439973	2.35657	1549	49	16	17847	ITIH3,LYZ,SERPINF2,KNG1,APOH,A1BG,SERPINA3,CPB2,TMSB4X,AHSG,PROS1,NPVF,LRG1,CLU,TIMP1,SLPI
GO:BP	positive regulation of response to wounding	GO:1903036	0.00468386	2.3294	77	49	5	17847	SERPINF2,VTN,APOH,CPB2,F12
GO:BP	negative regulation of fibrinolysis	GO:0051918	0.00500558	2.30055	10	49	3	17847	SERPINF2,APOH,CPB2
GO:BP	positive regulation of immune system process	GO:0002684	0.00508098	2.29405	1189	49	14	17847	VCAM1,C1RL,C1QB,VTN,C8A,CPB2,C1QC,PROS1,C9,C1R,C8B,CLU,CFHR1,IGFBP2
GO:BP	export from cell	GO:0140352	0.00646071	2.18972	1595	49	16	17847	ITIH3,LYZ,SERPINF2,KNG1,APOH,A1BG,SERPINA3,CPB2,TMSB4X,AHSG,PROS1,NPVF,LRG1,CLU,TIMP1,SLPI
GO:BP	negative regulation of cellular process	GO:0048523	0.00718525	2.14356	4914	49	29	17847	CST4,LCN1,ITIH3,VIM,COL5A1,CRYAA,CRYAB,PLXNB2,SERPINF2,SERPIND1,VTN,SERPINC1,KNG1,APOH,FETUB,SERPINA3,CPB2,C1QC,WFIKKN2,TMSB4X,TMSB10,AHSG,PROS1,NPVF,MST1,CLU,TIMP1,IGFBP2,SLPI
GO:BP	positive regulation of immune response	GO:0050778	0.00834957	2.07834	894	49	12	17847	C1RL,C1QB,VTN,C8A,CPB2,C1QC,PROS1,C9,C1R,C8B,CLU,CFHR1
GO:BP	regulation of response to stimulus	GO:0048583	0.0091328	2.0394	4370	49	27	17847	VCAM1,C1RL,CRYAB,SERPINF2,C1QB,VTN,SERPINC1,KNG1,APOH,C8A,CPB2,C1QC,WFIKKN2,TMSB4X,AHSG,PROS1,C9,LRG1,MST1,C1R,C8B,CLU,CFHR1,F10,TIMP1,IGFBP2,F12
GO:BP	regulation of molecular function	GO:0065009	0.00929784	2.03162	3013	49	22	17847	CST4,LCN1,ITIH3,CRYAB,PLXNB2,SERPINF2,SERPIND1,VTN,SERPINC1,KNG1,APOH,FETUB,SERPINA3,WFIKKN2,TMSB4X,AHSG,PROS1,CLU,CFHR1,TIMP1,PCOLCE,SLPI
GO:BP	lymphocyte mediated immunity	GO:0002449	0.0106766	1.97157	354	49	8	17847	C1RL,C1QB,C8A,C1QC,C9,C1R,C8B,CLU
GO:BP	adaptive immune response based on somatic recombination of immune receptors built from immunoglobulin superfamily domains	GO:0002460	0.0115952	1.93572	358	49	8	17847	C1RL,C1QB,C8A,C1QC,C9,C1R,C8B,CLU
GO:BP	regulation of immune response	GO:0050776	0.0139513	1.85539	1113	49	13	17847	VCAM1,C1RL,C1QB,VTN,C8A,CPB2,C1QC,PROS1,C9,C1R,C8B,CLU,CFHR1
GO:BP	complement activation, alternative pathway	GO:0006957	0.0150666	1.82199	14	49	3	17847	C8A,C9,C8B
GO:BP	regulation of plasminogen activation	GO:0010755	0.0150666	1.82199	14	49	3	17847	SERPINF2,CPB2,F12
GO:BP	acute-phase response	GO:0006953	0.0178256	1.74896	47	49	4	17847	CD163,SERPINF2,SERPINA3,AHSG
GO:BP	negative regulation of multicellular organismal process	GO:0051241	0.0193773	1.71271	1334	49	14	17847	VIM,COL5A1,SERPINF2,VTN,KNG1,APOH,CPB2,C1QC,TMSB4X,AHSG,PROS1,NPVF,TIMP1,F12
GO:BP	negative regulation of biological process	GO:0048519	0.0333732	1.4766	5596	49	30	17847	CST4,LCN1,ITIH3,VIM,COL5A1,CRYAA,CRYAB,PLXNB2,SERPINF2,SERPIND1,VTN,SERPINC1,KNG1,APOH,FETUB,SERPINA3,CPB2,C1QC,WFIKKN2,TMSB4X,TMSB10,AHSG,PROS1,NPVF,MST1,CLU,TIMP1,IGFBP2,F12,SLPI

## Sheet: 4B
Table S4. (B) Biological process of downregulated differentially expressed proteins in aqueous humor under corneal endothelial cell dysfunction.
Source	Term_name	Term_ID	Adjusted_p_value	Negative_log10_of_adjusted_p_value	Term_size	Query_size	Intersection_size	Effective_domain_size	Intersections
GO:BP	regulated exocytosis	GO:0045055	9.27091e-10	9.03288	792	73	22	17847	PGAM1,ARSB,ALDOC,CREG1,SDF4,LGALS3BP,HBB,GPI,APLP2,FGG,GAS6,S100A9,APP,SPARC,SOD1,FGA,FABP5,PPIA,C3,HEXB,PSAP,HRG
GO:BP	exocytosis	GO:0006887	1.54221e-09	8.81186	906	73	23	17847	PGAM1,ARSB,ALDOC,CREG1,SDF4,LGALS3BP,HBB,GPI,APLP2,FGG,GAS6,S100A9,APP,SPARC,SOD1,ATP6AP1,FGA,FABP5,PPIA,C3,HEXB,PSAP,HRG
GO:BP	anatomical structure development	GO:0048856	5.74524e-09	8.24069	6028	73	54	17847	DKK3,CRYBB1,CA2,CRYBA1,CRYBA4,ARSB,ALDOC,CRYBB2,SERPINI1,CREG1,SPOCK1,SDF4,SCG2,COL9A3,GPI,TPI1,CLSTN1,FGG,VGF,CLSTN3,HSPB1,GAS6,L1CAM,CRYGS,S100A9,SEMA3A,VCAN,APP,SPARC,TWSG1,SOD1,AGRN,ATP6AP1,FSTL5,C2ORF40,FGA,TPP1,FSTL4,APOB,TGFBI,XYLT1,ITM2B,FABP5,EFNA5,CPQ,C3,NEO1,HEXB,PSAP,ENPP2,SEMA7A,CHRDL1,HRG,SERPINF1
GO:BP	secretion by cell	GO:0032940	6.08204e-08	7.21595	1549	73	27	17847	PGAM1,ARSB,ALDOC,CREG1,SDF4,SCG2,LGALS3BP,HBB,GPI,APLP2,FGG,VGF,GAS6,S100A9,APP,SPARC,SOD1,ATP6AP1,FGA,FABP5,EFNA5,PPIA,SCG5,C3,HEXB,PSAP,HRG
GO:BP	secretion	GO:0046903	7.04913e-08	7.15186	1686	73	28	17847	CA2,PGAM1,ARSB,ALDOC,CREG1,SDF4,SCG2,LGALS3BP,HBB,GPI,APLP2,FGG,VGF,GAS6,S100A9,APP,SPARC,SOD1,ATP6AP1,FGA,FABP5,EFNA5,PPIA,SCG5,C3,HEXB,PSAP,HRG
GO:BP	developmental process	GO:0032502	1.14728e-07	6.94033	6449	73	54	17847	DKK3,CRYBB1,CA2,CRYBA1,CRYBA4,ARSB,ALDOC,CRYBB2,SERPINI1,CREG1,SPOCK1,SDF4,SCG2,COL9A3,GPI,TPI1,CLSTN1,FGG,VGF,CLSTN3,HSPB1,GAS6,L1CAM,CRYGS,S100A9,SEMA3A,VCAN,APP,SPARC,TWSG1,SOD1,AGRN,ATP6AP1,FSTL5,C2ORF40,FGA,TPP1,FSTL4,APOB,TGFBI,XYLT1,ITM2B,FABP5,EFNA5,CPQ,C3,NEO1,HEXB,PSAP,ENPP2,SEMA7A,CHRDL1,HRG,SERPINF1
GO:BP	export from cell	GO:0140352	1.19149e-07	6.92391	1595	73	27	17847	PGAM1,ARSB,ALDOC,CREG1,SDF4,SCG2,LGALS3BP,HBB,GPI,APLP2,FGG,VGF,GAS6,S100A9,APP,SPARC,SOD1,ATP6AP1,FGA,FABP5,EFNA5,PPIA,SCG5,C3,HEXB,PSAP,HRG
GO:BP	platelet degranulation	GO:0002576	2.1768e-07	6.66218	126	73	10	17847	LGALS3BP,APLP2,FGG,GAS6,APP,SPARC,SOD1,FGA,PSAP,HRG
GO:BP	multicellular organism development	GO:0007275	5.27391e-07	6.27787	5532	73	49	17847	DKK3,CRYBB1,CA2,CRYBA1,CRYBA4,ARSB,CRYBB2,SERPINI1,CREG1,SPOCK1,SDF4,SCG2,COL9A3,GPI,TPI1,CLSTN1,VGF,CLSTN3,HSPB1,GAS6,L1CAM,CRYGS,S100A9,SEMA3A,VCAN,APP,SPARC,TWSG1,SOD1,AGRN,ATP6AP1,FSTL5,C2ORF40,TPP1,FSTL4,APOB,TGFBI,XYLT1,ITM2B,EFNA5,C3,NEO1,HEXB,PSAP,ENPP2,SEMA7A,CHRDL1,HRG,SERPINF1
GO:BP	vesicle-mediated transport	GO:0016192	7.43547e-07	6.12869	2146	73	30	17847	PGAM1,ARSB,ALDOC,CREG1,SDF4,LGALS3BP,HBB,GPI,APLP2,CLSTN1,FGG,GAS6,S100A9,APP,SPARC,SOD1,SORCS1,ATP6AP1,FGA,APOB,FABP5,PPIA,C3,HEXB,IGHM,APOC3,PSAP,ENPP2,F9,HRG
GO:BP	system development	GO:0048731	3.80464e-06	5.41969	4967	73	45	17847	DKK3,CRYBB1,CA2,CRYBA1,CRYBA4,ARSB,CRYBB2,SERPINI1,SPOCK1,SDF4,SCG2,COL9A3,CLSTN1,VGF,CLSTN3,HSPB1,GAS6,L1CAM,CRYGS,S100A9,SEMA3A,VCAN,APP,SPARC,TWSG1,SOD1,AGRN,ATP6AP1,C2ORF40,TPP1,FSTL4,APOB,TGFBI,XYLT1,ITM2B,EFNA5,C3,NEO1,HEXB,PSAP,ENPP2,SEMA7A,CHRDL1,HRG,SERPINF1
GO:BP	multicellular organismal process	GO:0032501	4.21411e-06	5.37529	7775	73	57	17847	DKK3,CRYBB1,CA2,CRYBA1,CRYBA4,ARSB,CRYBB2,SERPINI1,CREG1,SPOCK1,SDF4,SCG2,COL9A3,HBB,IMPG2,GPI,TPI1,CLSTN1,FGG,VGF,CLSTN3,HSPB1,GAS6,L1CAM,CRYGS,S100A9,SEMA3A,VCAN,APP,SPARC,TWSG1,SOD1,ENO1,AGRN,ATP6AP1,FSTL5,C2ORF40,FGA,TPP1,FSTL4,APOB,TGFBI,XYLT1,ITM2B,FABP5,EFNA5,C3,NEO1,HEXB,APOC3,PSAP,ENPP2,SEMA7A,CHRDL1,F9,HRG,SERPINF1
GO:BP	regulation of growth	GO:0040008	4.309e-06	5.36562	689	73	17	17847	CREG1,SPOCK1,CLSTN1,CLSTN3,GAS6,L1CAM,S100A9,SEMA3A,APP,SOD1,ENO1,AGRN,FSTL4,TKT,EFNA5,SEMA7A,HRG
GO:BP	positive regulation of multicellular organismal process	GO:0051240	1.44346e-05	4.84059	1835	73	26	17847	CA2,ARSB,SERPINI1,GPI,CLSTN1,FGG,CLSTN3,HSPB1,GAS6,L1CAM,S100A9,SEMA3A,APP,SPARC,SOD1,ENO1,AGRN,ATP6AP1,FGA,FABP5,EFNA5,C3,ENPP2,SEMA7A,HRG,SERPINF1
GO:BP	growth	GO:0040007	3.43079e-05	4.46461	1009	73	19	17847	CREG1,SPOCK1,CLSTN1,CLSTN3,GAS6,L1CAM,S100A9,SEMA3A,APP,SOD1,ENO1,AGRN,FSTL4,TKT,EFNA5,CPQ,PSAP,SEMA7A,HRG
GO:BP	NADH metabolic process	GO:0006734	5.64483e-05	4.24835	44	73	6	17847	PGAM1,ALDOC,MDH1,GPI,TPI1,ENO1
GO:BP	NAD metabolic process	GO:0019674	0.000124639	3.90435	50	73	6	17847	PGAM1,ALDOC,MDH1,GPI,TPI1,ENO1
GO:BP	glucose catabolic process to pyruvate	GO:0061718	0.000178519	3.74832	27	73	5	17847	PGAM1,ALDOC,GPI,TPI1,ENO1
GO:BP	NADH regeneration	GO:0006735	0.000178519	3.74832	27	73	5	17847	PGAM1,ALDOC,GPI,TPI1,ENO1
GO:BP	canonical glycolysis	GO:0061621	0.000178519	3.74832	27	73	5	17847	PGAM1,ALDOC,GPI,TPI1,ENO1
GO:BP	nervous system development	GO:0007399	0.000213127	3.67136	2400	73	28	17847	ARSB,SERPINI1,SPOCK1,SDF4,CLSTN1,CLSTN3,GAS6,L1CAM,S100A9,SEMA3A,VCAN,APP,TWSG1,SOD1,AGRN,C2ORF40,TPP1,FSTL4,APOB,ITM2B,EFNA5,C3,NEO1,HEXB,PSAP,SEMA7A,CHRDL1,SERPINF1
GO:BP	glycolytic process through fructose-6-phosphate	GO:0061615	0.000216638	3.66427	28	73	5	17847	PGAM1,ALDOC,GPI,TPI1,ENO1
GO:BP	glycolytic process through glucose-6-phosphate	GO:0061620	0.000216638	3.66427	28	73	5	17847	PGAM1,ALDOC,GPI,TPI1,ENO1
GO:BP	monosaccharide biosynthetic process	GO:0046364	0.000374996	3.42597	99	73	7	17847	PGAM1,ALDOC,MDH1,GPI,TPI1,ENO1,TKT
GO:BP	cell activation	GO:0001775	0.00049419	3.30611	1455	73	21	17847	PGAM1,ARSB,ALDOC,CREG1,HBB,GPI,FGG,HSPB1,GAS6,S100A9,APP,TWSG1,SOD1,FGA,FABP5,PPIA,C3,HEXB,IGHM,PSAP,HRG
GO:BP	post-translational protein modification	GO:0043687	0.000581252	3.23564	363	73	11	17847	SCG2,APLP2,FGG,VGF,GAS6,VCAN,APP,FGA,APOB,C3,CHRDL1
GO:BP	glucose catabolic process	GO:0006007	0.000810143	3.09144	36	73	5	17847	PGAM1,ALDOC,GPI,TPI1,ENO1
GO:BP	aldehyde biosynthetic process	GO:0046184	0.00107542	2.96842	16	73	4	17847	DKK3,GPI,TPI1,TKT
GO:BP	neutrophil degranulation	GO:0043312	0.00134718	2.87057	484	73	12	17847	PGAM1,ARSB,ALDOC,CREG1,HBB,GPI,S100A9,FABP5,PPIA,C3,HEXB,PSAP
GO:BP	neutrophil activation involved in immune response	GO:0002283	0.0014382	2.84218	487	73	12	17847	PGAM1,ARSB,ALDOC,CREG1,HBB,GPI,S100A9,FABP5,PPIA,C3,HEXB,PSAP
GO:BP	cell growth	GO:0016049	0.00170825	2.76745	495	73	12	17847	SPOCK1,CLSTN1,CLSTN3,L1CAM,S100A9,SEMA3A,APP,ENO1,FSTL4,EFNA5,SEMA7A,HRG
GO:BP	positive regulation of developmental process	GO:0051094	0.00176478	2.75331	1432	73	20	17847	CA2,ARSB,SERPINI1,CLSTN1,FGG,CLSTN3,HSPB1,GAS6,L1CAM,S100A9,SEMA3A,AGRN,ATP6AP1,FGA,APOB,EFNA5,C3,ENPP2,SEMA7A,SERPINF1
GO:BP	neutrophil activation	GO:0042119	0.00182059	2.73979	498	73	12	17847	PGAM1,ARSB,ALDOC,CREG1,HBB,GPI,S100A9,FABP5,PPIA,C3,HEXB,PSAP
GO:BP	neutrophil mediated immunity	GO:0002446	0.00182059	2.73979	498	73	12	17847	PGAM1,ARSB,ALDOC,CREG1,HBB,GPI,S100A9,FABP5,PPIA,C3,HEXB,PSAP
GO:BP	negative regulation of endopeptidase activity	GO:0010951	0.0020348	2.69148	252	73	9	17847	SERPINI1,SPOCK1,GPI,APLP2,GAS6,APP,C3,HRG,SERPINF1
GO:BP	granulocyte activation	GO:0036230	0.00206518	2.68504	504	73	12	17847	PGAM1,ARSB,ALDOC,CREG1,HBB,GPI,S100A9,FABP5,PPIA,C3,HEXB,PSAP
GO:BP	regulation of cell growth	GO:0001558	0.00234493	2.62987	418	73	11	17847	SPOCK1,CLSTN1,CLSTN3,L1CAM,S100A9,SEMA3A,ENO1,FSTL4,EFNA5,SEMA7A,HRG
GO:BP	negative regulation of peptidase activity	GO:0010466	0.00299443	2.52369	264	73	9	17847	SERPINI1,SPOCK1,GPI,APLP2,GAS6,APP,C3,HRG,SERPINF1
GO:BP	extracellular structure organization	GO:0043062	0.003022	2.51971	429	73	11	17847	COL9A3,FGG,GAS6,VCAN,APP,SPARC,AGRN,FGA,APOB,TGFBI,APOC3
GO:BP	regulation of developmental process	GO:0050793	0.00315944	2.50039	2729	73	28	17847	CA2,ARSB,SERPINI1,SPOCK1,CLSTN1,FGG,CLSTN3,HSPB1,GAS6,L1CAM,S100A9,SEMA3A,APP,SPARC,TWSG1,SOD1,AGRN,ATP6AP1,FGA,FSTL4,APOB,EFNA5,C3,HEXB,ENPP2,SEMA7A,HRG,SERPINF1
GO:BP	leukocyte degranulation	GO:0043299	0.00356617	2.4478	531	73	12	17847	PGAM1,ARSB,ALDOC,CREG1,HBB,GPI,S100A9,FABP5,PPIA,C3,HEXB,PSAP
GO:BP	gluconeogenesis	GO:0006094	0.00429331	2.36721	90	73	6	17847	PGAM1,ALDOC,MDH1,GPI,TPI1,ENO1
GO:BP	regulation of multicellular organismal process	GO:0051239	0.00432463	2.36405	3300	73	31	17847	CA2,CRYBA1,ARSB,SERPINI1,SPOCK1,GPI,CLSTN1,FGG,CLSTN3,HSPB1,GAS6,L1CAM,S100A9,SEMA3A,APP,SPARC,TWSG1,SOD1,ENO1,AGRN,ATP6AP1,FGA,FSTL4,FABP5,EFNA5,C3,APOC3,ENPP2,SEMA7A,HRG,SERPINF1
GO:BP	myeloid cell activation involved in immune response	GO:0002275	0.00433004	2.36351	541	73	12	17847	PGAM1,ARSB,ALDOC,CREG1,HBB,GPI,S100A9,FABP5,PPIA,C3,HEXB,PSAP
GO:BP	organonitrogen compound metabolic process	GO:1901564	0.00470188	2.32773	6854	73	48	17847	CRYBA1,PGAM1,ARSB,ALDOC,SERPINI1,SPOCK1,SCG2,GPI,TPI1,APLP2,FGG,VGF,HSPB1,GAS6,S100A9,SEMA3A,VCAN,APP,TWSG1,SOD1,ENO1,GALNT2,AGRN,ATP6AP1,C2ORF40,FGA,TPP1,APOB,TGFBI,XYLT1,ITM2B,FABP5,EFNA5,PPIA,SCG5,CPQ,C3,B4GAT1,HEXB,APOC3,PSAP,ENPP2,SEMA7A,MAN1A1,CHRDL1,F9,HRG,SERPINF1
GO:BP	carbohydrate derivative metabolic process	GO:1901135	0.00493172	2.307	1123	73	17	17847	PGAM1,ARSB,ALDOC,GPI,TPI1,VCAN,APP,ENO1,GALNT2,AGRN,XYLT1,ITM2B,TKT,B4GAT1,HEXB,PSAP,MAN1A1
GO:BP	myeloid leukocyte mediated immunity	GO:0002444	0.00494774	2.30559	548	73	12	17847	PGAM1,ARSB,ALDOC,CREG1,HBB,GPI,S100A9,FABP5,PPIA,C3,HEXB,PSAP
GO:BP	chemotaxis	GO:0006935	0.0050865	2.29358	653	73	13	17847	SCG2,HSPB1,GAS6,L1CAM,S100A9,SEMA3A,APP,AGRN,EFNA5,NEO1,ENPP2,SEMA7A,HRG
GO:BP	myeloid leukocyte activation	GO:0002274	0.0050865	2.29358	653	73	13	17847	PGAM1,ARSB,ALDOC,CREG1,HBB,GPI,S100A9,APP,FABP5,PPIA,C3,HEXB,PSAP
GO:BP	hexose biosynthetic process	GO:0019319	0.00520565	2.28353	93	73	6	17847	PGAM1,ALDOC,MDH1,GPI,TPI1,ENO1
GO:BP	taxis	GO:0042330	0.005261	2.27893	655	73	13	17847	SCG2,HSPB1,GAS6,L1CAM,S100A9,SEMA3A,APP,AGRN,EFNA5,NEO1,ENPP2,SEMA7A,HRG
GO:BP	sensory system development	GO:0048880	0.00631351	2.19973	372	73	10	17847	CRYBB1,CRYBA1,CRYBA4,CRYBB2,CRYGS,SEMA3A,TWSG1,C3,CHRDL1,SERPINF1
GO:BP	cell adhesion	GO:0007155	0.00688413	2.16215	1421	73	19	17847	SERPINI1,SPOCK1,LGALS3BP,HBB,CLSTN1,FGG,CLSTN3,HSPB1,GAS6,L1CAM,S100A9,VCAN,APP,TWSG1,FGA,TGFBI,EFNA5,NEO1,HRG
GO:BP	biological adhesion	GO:0022610	0.0074015	2.13068	1428	73	19	17847	SERPINI1,SPOCK1,LGALS3BP,HBB,CLSTN1,FGG,CLSTN3,HSPB1,GAS6,L1CAM,S100A9,VCAN,APP,TWSG1,FGA,TGFBI,EFNA5,NEO1,HRG
GO:BP	response to inorganic substance	GO:0010035	0.00742787	2.12914	570	73	12	17847	CA2,CUTA,HBB,GPI,FGG,APP,SPARC,SOD1,FGA,APOB,PSAP,SERPINF1
GO:BP	regulation of plasma membrane bounded cell projection organization	GO:0120035	0.00833005	2.07935	683	73	13	17847	ARSB,SERPINI1,SPOCK1,L1CAM,S100A9,SEMA3A,AGRN,FSTL4,EFNA5,ENPP2,SEMA7A,HRG,SERPINF1
GO:BP	hexose catabolic process	GO:0019320	0.00918245	2.03704	58	73	5	17847	PGAM1,ALDOC,GPI,TPI1,ENO1
GO:BP	regulation of cell projection organization	GO:0031344	0.00976189	2.01047	693	73	13	17847	ARSB,SERPINI1,SPOCK1,L1CAM,S100A9,SEMA3A,AGRN,FSTL4,EFNA5,ENPP2,SEMA7A,HRG,SERPINF1
GO:BP	platelet aggregation	GO:0070527	0.011809	1.92779	61	73	5	17847	HBB,FGG,HSPB1,GAS6,FGA
GO:BP	cell activation involved in immune response	GO:0002263	0.011948	1.9227	706	73	13	17847	PGAM1,ARSB,ALDOC,CREG1,HBB,GPI,S100A9,APP,FABP5,PPIA,C3,HEXB,PSAP
GO:BP	protein metabolic process	GO:0019538	0.0122007	1.91362	5905	73	43	17847	CRYBA1,ARSB,SERPINI1,SPOCK1,SCG2,GPI,APLP2,FGG,VGF,HSPB1,GAS6,S100A9,SEMA3A,VCAN,APP,TWSG1,SOD1,ENO1,GALNT2,ATP6AP1,C2ORF40,FGA,TPP1,APOB,TGFBI,XYLT1,ITM2B,EFNA5,PPIA,SCG5,CPQ,C3,B4GAT1,HEXB,APOC3,PSAP,ENPP2,SEMA7A,MAN1A1,CHRDL1,F9,HRG,SERPINF1
GO:BP	small molecule biosynthetic process	GO:0044283	0.0150016	1.82386	721	73	13	17847	DKK3,PGAM1,ALDOC,MDH1,GPI,TPI1,VCAN,SOD1,ENO1,APOB,FABP5,TKT,APOC3
GO:BP	regulation of biological quality	GO:0065008	0.0184215	1.73467	4103	73	34	17847	DKK3,CA2,HBB,GPI,CLSTN1,FGG,VGF,CLSTN3,HSPB1,GAS6,L1CAM,S100A9,SEMA3A,APP,SPARC,SOD1,AGRN,ATP6AP1,FGA,TPP1,FSTL4,APOB,FABP5,EFNA5,SCG5,CPQ,C3,NEO1,HEXB,APOC3,SEMA7A,F9,HRG,SERPINF1
GO:BP	glycolytic process	GO:0006096	0.0197722	1.70395	117	73	6	17847	PGAM1,ALDOC,GPI,TPI1,APP,ENO1
GO:BP	locomotion	GO:0040011	0.0198615	1.70199	1983	73	22	17847	ARSB,SPOCK1,SCG2,GPI,HSPB1,GAS6,L1CAM,S100A9,SEMA3A,APP,SPARC,AGRN,APOB,EFNA5,PPIA,NEO1,HEXB,IGHM,ENPP2,SEMA7A,HRG,SERPINF1
GO:BP	monosaccharide catabolic process	GO:0046365	0.0202373	1.69385	68	73	5	17847	PGAM1,ALDOC,GPI,TPI1,ENO1
GO:BP	ATP generation from ADP	GO:0006757	0.0207645	1.68268	118	73	6	17847	PGAM1,ALDOC,GPI,TPI1,APP,ENO1
GO:BP	regulation of endopeptidase activity	GO:0052548	0.0221937	1.65377	429	73	10	17847	SERPINI1,SPOCK1,GPI,APLP2,GAS6,S100A9,APP,C3,HRG,SERPINF1
GO:BP	negative regulation of endothelial cell apoptotic process	GO:2000352	0.0259192	1.58638	34	73	4	17847	SCG2,FGG,GAS6,FGA
GO:BP	regulation of multicellular organismal development	GO:2000026	0.0265454	1.57601	2180	73	23	17847	CA2,ARSB,SERPINI1,SPOCK1,CLSTN1,CLSTN3,HSPB1,GAS6,L1CAM,S100A9,SEMA3A,APP,SPARC,SOD1,AGRN,ATP6AP1,FSTL4,EFNA5,C3,ENPP2,SEMA7A,HRG,SERPINF1
GO:BP	ADP metabolic process	GO:0046031	0.0302478	1.51931	126	73	6	17847	PGAM1,ALDOC,GPI,TPI1,APP,ENO1
GO:BP	epithelial cell migration	GO:0010631	0.0317319	1.4985	353	73	9	17847	ARSB,SCG2,GPI,HSPB1,SEMA3A,SPARC,ENPP2,HRG,SERPINF1
GO:BP	leukocyte activation	GO:0045321	0.0333556	1.47683	1296	73	17	17847	PGAM1,ARSB,ALDOC,CREG1,HBB,GPI,GAS6,S100A9,APP,TWSG1,SOD1,FABP5,PPIA,C3,HEXB,IGHM,PSAP
GO:BP	epithelium migration	GO:0090132	0.0339405	1.46928	356	73	9	17847	ARSB,SCG2,GPI,HSPB1,SEMA3A,SPARC,ENPP2,HRG,SERPINF1
GO:BP	positive regulation of nervous system development	GO:0051962	0.0346066	1.46084	554	73	11	17847	ARSB,SERPINI1,CLSTN1,CLSTN3,L1CAM,S100A9,SEMA3A,AGRN,EFNA5,SEMA7A,SERPINF1
GO:BP	sensory organ development	GO:0007423	0.0351923	1.45355	555	73	11	17847	CRYBB1,CRYBA1,CRYBA4,CRYBB2,CRYGS,SPARC,TWSG1,SOD1,PSAP,CHRDL1,SERPINF1
GO:BP	movement of cell or subcellular component	GO:0006928	0.0361117	1.44235	2221	73	23	17847	ARSB,SPOCK1,SCG2,GPI,HSPB1,GAS6,L1CAM,S100A9,SEMA3A,APP,SPARC,SOD1,AGRN,APOB,EFNA5,PPIA,NEO1,HEXB,IGHM,ENPP2,SEMA7A,HRG,SERPINF1
GO:BP	cell migration	GO:0016477	0.0372873	1.42844	1597	73	19	17847	ARSB,SPOCK1,SCG2,GPI,HSPB1,GAS6,L1CAM,S100A9,SEMA3A,APP,SPARC,APOB,PPIA,HEXB,IGHM,ENPP2,SEMA7A,HRG,SERPINF1
GO:BP	regulation of peptidase activity	GO:0052547	0.0376694	1.42401	456	73	10	17847	SERPINI1,SPOCK1,GPI,APLP2,GAS6,S100A9,APP,C3,HRG,SERPINF1
GO:BP	negative regulation of proteolysis	GO:0045861	0.0379134	1.42121	361	73	9	17847	SERPINI1,SPOCK1,GPI,APLP2,GAS6,APP,C3,HRG,SERPINF1
GO:BP	tissue migration	GO:0090130	0.0387538	1.41169	362	73	9	17847	ARSB,SCG2,GPI,HSPB1,SEMA3A,SPARC,ENPP2,HRG,SERPINF1
GO:BP	methylglyoxal biosynthetic process	GO:0019242	0.0392916	1.4057	2	73	2	17847	GPI,TPI1
GO:BP	glyceraldehyde-3-phosphate biosynthetic process	GO:0046166	0.0392916	1.4057	2	73	2	17847	TPI1,TKT
GO:BP	visual system development	GO:0150063	0.0431987	1.36453	367	73	9	17847	CRYBB1,CRYBA1,CRYBA4,CRYBB2,CRYGS,TWSG1,C3,CHRDL1,SERPINF1
GO:BP	positive regulation of cell development	GO:0010720	0.0436293	1.36022	568	73	11	17847	ARSB,SERPINI1,FGG,L1CAM,S100A9,SEMA3A,ATP6AP1,FGA,EFNA5,SEMA7A,SERPINF1
GO:BP	carbohydrate catabolic process	GO:0016052	0.0442246	1.35434	202	73	7	17847	PGAM1,ALDOC,GPI,TPI1,APP,ENO1,HEXB
GO:BP	negative regulation of hydrolase activity	GO:0051346	0.0445679	1.35098	465	73	10	17847	SERPINI1,SPOCK1,GPI,APLP2,GAS6,APP,C3,APOC3,HRG,SERPINF1
GO:BP	ameboidal-type cell migration	GO:0001667	0.0445679	1.35098	465	73	10	17847	ARSB,SCG2,GPI,HSPB1,SEMA3A,SPARC,ENPP2,SEMA7A,HRG,SERPINF1
GO:BP	lens development in camera-type eye	GO:0002088	0.0449285	1.34748	80	73	5	17847	CRYBB1,CRYBA1,CRYBA4,CRYBB2,CRYGS
GO:BP	chondroitin sulfate metabolic process	GO:0030204	0.0452646	1.34424	39	73	4	17847	ARSB,VCAN,XYLT1,HEXB
GO:BP	anatomical structure morphogenesis	GO:0009653	0.0452743	1.34415	2764	73	26	17847	DKK3,CA2,SCG2,GPI,FGG,HSPB1,L1CAM,CRYGS,SEMA3A,APP,SPARC,TWSG1,SOD1,AGRN,FGA,FSTL4,APOB,TGFBI,EFNA5,C3,NEO1,HEXB,ENPP2,SEMA7A,HRG,SERPINF1
GO:BP	nucleoside diphosphate phosphorylation	GO:0006165	0.0467359	1.33035	136	73	6	17847	PGAM1,ALDOC,GPI,TPI1,APP,ENO1
GO:BP	response to metal ion	GO:0010038	0.0470609	1.32734	371	73	9	17847	CA2,CUTA,GPI,FGG,APP,SPARC,SOD1,FGA,SERPINF1
