# Supplementary material for: Integrated Analysis of Transcriptome and Proteome of the Human Cornea and Aqueous Humor Reveal Novel Biomarkers for Corneal Endothelial Cell Dysfunction
Source: Int J Mol Sci. 2023 Oct 19;24(20):15354. doi: 10.3390/ijms242015354 (PMC10607268; doi:10.3390/ijms242015354)
Supplement: Supplementary file 1 [file ijms-24-15354-s001.zip › Table S5.xlsx]

## Sheet: 5
Table S5. Differentially expressed proteins between corneal endothelial cell dysfunction (CECD) and control groups with fold change > 2 and p value < 0.05 in individual data-independent acquisition proteomic analysis.
Upregulated proteins in CECD						Downregulated proteins in CECD
Accession Number	Gene Symbol	Description	Fold change (CECD/Control)	P value	Accession Number	Gene Symbol	Description	Fold change (CECD/Control)	P value
Q86YM7	HOMER1	Homer protein homolog 1	413500	0.021455	A0A0B4J2D9	IGKV1D-13	Immunoglobulin kappa variable 1D-13	0.088554	0.044758
Q9UEW3	MARCO	Macrophage receptor MARCO	117350	0.011234	P01040	CSTA	Cystatin-A	0.10105	0.0021332
P01303	NPY	Pro-neuropeptide Y	70147	0.030567	Q08188	TGM3	Protein-glutamine gamma-glutamyltransferase E	0.1172	0.0073701
Q86VZ4	LRP11	Low-density lipoprotein receptor-related protein 11	23157	0.027254	P04430	IGKV1-16	Immunoglobulin kappa variable 1-16	0.14074	0.02166
O75071	EFCAB14	EF-hand calcium-binding domain-containing protein 14	18222	0.017583	A0A0B4J1X8	IGHV3-43	Immunoglobulin heavy variable 3-43	0.15619	0.014717
Q06828	FMOD	Fibromodulin	159.8	0.03708	A0A075B6R9	IGKV2D-24	Probable non-functional immunoglobulin kappa variable 2D-24	0.20466	0.019655
P20908	COL5A1	Collagen alpha-1(V) chain	105.09	0.04309	P05089	ARG1	Arginase-1	0.2285	0.0083324
Q96NZ9	PRAP1	Proline-rich acidic protein 1	33.972	0.0073082	A0A0C4DH72	IGKV1-6	Immunoglobulin kappa variable 1-6	0.25675	0.011303
Q969Z4	RELT	Tumor necrosis factor receptor superfamily member 19L	20.992	0.029235	Q5T749	KPRP	Keratinocyte proline-rich protein	0.26925	0.031049
P14314	PRKCSH	Glucosidase 2 subunit beta	16.961	0.023431	B9A064	IGLL5	Immunoglobulin lambda-like polypeptide 5	0.27285	0.036465
P50395	GDI2	Rab GDP dissociation inhibitor beta	15.836	0.031359	Q13835	PKP1	Plakophilin-1	0.27895	0.04864
P20396	TRH	Pro-thyrotropin-releasing hormone	15.788	0.038722	P04259	KRT6B	Keratin, type II cytoskeletal 6B	0.28331	0.020385
O14786	NRP1	Neuropilin-1	14.34	0.020493	Q6KB66	KRT80	Keratin, type II cytoskeletal 80	0.28749	0.010223
P14207	FOLR2	Folate receptor beta	14.053	0.0012984	P08519	LPA	Apolipoprotein(a)	0.289	0.015005
Q14766	LTBP1	Latent-transforming growth factor beta-binding protein 1	12.559	0.010893	P02671	FGA	Fibrinogen alpha chain	0.29241	0.016305
P29323	EPHB2	Ephrin type-B receptor 2	10.852	0.040661	Q86YZ3	HRNR	Hornerin	0.3022	0.030681
Q6GTX8	LAIR1	Leukocyte-associated immunoglobulin-like receptor 1	10.191	0.0022213	Q5D862	FLG2	Filaggrin-2	0.30306	0.043906
P00533	EGFR	Epidermal growth factor receptor	8.5863	0.046896	P02679	FGG	Fibrinogen gamma chain	0.30652	0.024416
P45877	PPIC	Peptidyl-prolyl cis-trans isomerase C	8.3294	0.015853	P02675	FGB	Fibrinogen beta chain	0.32013	0.016559
Q8IYS5	OSCAR	Osteoclast-associated immunoglobulin-like receptor	8.2891	0.033909	P04114	APOB	Apolipoprotein B-100	0.32123	0.016973
P55285	CDH6	Cadherin-6	8.1266	0.035594	P13645	KRT10	Keratin, type I cytoskeletal 10	0.32759	0.022122
O95428	PAPLN	Papilin	7.3739	0.012349	P48740	MASP1	Mannan-binding lectin serine protease 1	0.33182	0.031164
Q9UNW1	MINPP1	Multiple inositol polyphosphate phosphatase 1	6.8334	0.028618	A0A0C4DH35	IGHV3-35	Probable non-functional immunoglobulin heavy variable 3-35	0.33595	0.023175
Q14563	SEMA3A	Semaphorin-3A	6.6489	0.046143	P35908	KRT2	Keratin, type II cytoskeletal 2 epidermal	0.33776	0.045495
P19320	VCAM1	Vascular cell adhesion protein 1	6.1221	0.047865	P01717	IGLV3-25	Immunoglobulin lambda variable 3-25	0.34316	0.024177
Q9BYH1	SEZ6L	Seizure 6-like protein	6.0637	0.034018	P35527	KRT9	Keratin, type I cytoskeletal 9	0.34733	0.013849
P62942	FKBP1A	Peptidyl-prolyl cis-trans isomerase FKBP1A	6.0425	0.0051147	P04264	KRT1	Keratin, type II cytoskeletal 1	0.34762	0.033544
Q8N126	CADM3	Cell adhesion molecule 3	5.9939	0.0063809	P01700	IGLV1-47	Immunoglobulin lambda variable 1-47	0.35434	0.0080859
P0DJI8	SAA1	Serum amyloid A-1 protein	5.9835	0.0088802	A0A0A0MT36	IGKV6D-21	Immunoglobulin kappa variable 6D-21	0.35801	0.043084
Q92859	NEO1	Neogenin	5.8554	0.019134	P15924	DSP	Desmoplakin	0.35864	0.014266
Q14050	COL9A3	Collagen alpha-3(IX) chain	5.8517	0.048315	A0A075B6S5	IGKV1-27	Immunoglobulin kappa variable 1-27	0.36161	0.041528
O43827	ANGPTL7	Angiopoietin-related protein 7	5.6571	0.0015096	Q7Z794	KRT77	Keratin, type II cytoskeletal 1b	0.36302	0.017993
Q8TEU8	WFIKKN2	WAP, Kazal, immunoglobulin, Kunitz and NTR domain-containing protein 2	5.6248	0.0021176	P0DOY3	IGLC3	Immunoglobulin lambda constant 3	0.36407	0.026736
P02790	HPX	Hemopexin	5.5585	0.013445	P06310	IGKV2-30	Immunoglobulin kappa variable 2-30	0.36489	0.031591
Q9UNN8	PROCR	Endothelial protein C receptor	5.4608	0.010561	P01593	IGKV1D-33	Immunoglobulin kappa variable 1D-33	0.36716	0.0058718
O60938	KERA	Keratocan	5.3678	0.016488	A0A0C4DH25	IGKV3D-20	Immunoglobulin kappa variable 3D-20	0.37021	0.0018869
O75144	ICOSLG	ICOS ligand	5.2436	0.0079937	P13647	KRT5	Keratin, type II cytoskeletal 5	0.37193	0.023188
P02749	APOH	Beta-2-glycoprotein 1	4.8478	0.023393	P00738	HP	Haptoglobin	0.37371	0.0089109
Q14515	SPARCL1	SPARC-like protein 1	4.7816	0.0098288	A0A075B6P5	IGKV2-28	Immunoglobulin kappa variable 2-28	0.37936	0.016607
P19021	PAM	Peptidyl-glycine alpha-amidating monooxygenase	4.7005	0.027607	P01766	IGHV3-13	Immunoglobulin heavy variable 3-13	0.38127	0.027217
Q4KMG0	CDON	Cell adhesion molecule-related/down-regulated by oncogenes	4.667	0.041519	P01871	IGHM	Immunoglobulin heavy constant mu	0.3847	0.0058257
P02452	COL1A1	Collagen alpha-1(I) chain	4.5773	0.038396	P01876	IGHA1	Immunoglobulin heavy constant alpha 1	0.38718	0.0030592
Q9Y5Y7	LYVE1	Lymphatic vessel endothelial hyaluronic acid receptor 1	4.5485	0.039189	P01859	IGHG2	Immunoglobulin heavy constant gamma 2	0.39331	0.043584
Q9HCQ7	NPVF	Pro-FMRFamide-related neuropeptide VF	4.3012	0.015163	Q08554	DSC1	Desmocollin-1	0.39456	0.046141
P07333	CSF1R	Macrophage colony-stimulating factor 1 receptor	4.2957	0.034793	P80108	GPLD1	Phosphatidylinositol-glycan-specific phospholipase D	0.39511	0.021403
P02753	RBP4	Retinol-binding protein 4	4.2912	0.0073907	P01861	IGHG4	Immunoglobulin heavy constant gamma 4	0.39878	0.0046143
P40189	IL6ST	Interleukin-6 receptor subunit beta	4.2142	0.041092	P02538	KRT6A	Keratin, type II cytoskeletal 6A	0.399	0.049187
P51884	LUM	Lumican	4.1617	0.01489	O43866	CD5L	CD5 antigen-like	0.40371	0.0039602
P11684	SCGB1A1	Uteroglobin	4.0723	0.045003	P01023	A2M	Alpha-2-macroglobulin	0.40657	0.012634
P04217	A1BG	Alpha-1B-glycoprotein	3.9946	0.0087109	A0A075B6R2	IGHV4-4	Immunoglobulin heavy variable 4-4	0.41562	0.037633
Q9Y577	TRIM17	E3 ubiquitin-protein ligase TRIM17	3.957	0.027222	P01024	C3	Complement C3	0.4248	0.0078832
Q9UHI8	ADAMTS1	A disintegrin and metalloproteinase with thrombospondin motifs 1	3.9546	0.027433	A0A0A0MRZ8	IGKV3D-11	Immunoglobulin kappa variable 3D-11	0.42564	0.028644
Q9Y6R7	FCGBP	IgGFc-binding protein	3.7486	0.013914	P23083	IGHV1-2	Immunoglobulin heavy variable 1-2	0.4269	0.0043523
P10646	TFPI	Tissue factor pathway inhibitor	3.7477	0.038477	P01860	IGHG3	Immunoglobulin heavy constant gamma 3	0.43024	0.02104
P02787	TF	Serotransferrin	3.6734	0.025379	P01834	IGKC	Immunoglobulin kappa constant	0.44383	0.019112
P02774	GC	Vitamin D-binding protein	3.6666	0.0072184	O95445	APOM	Apolipoprotein M	0.45065	0.0050305
Q9BY67	CADM1	Cell adhesion molecule 1	3.637	0.0026449	A0A0B4J2H0	IGHV1-69D	Immunoglobulin heavy variable 1-69D	0.45109	0.020982
Q9BTY2	FUCA2	Plasma alpha-L-fucosidase	3.6322	0.046431	A0A087WSY6	IGKV3D-15	Immunoglobulin kappa variable 3D-15	0.45242	0.038509
P20774	OGN	Mimecan	3.6238	0.014658	P01591	JCHAIN	Immunoglobulin J chain	0.45456	0.0062656
Q53EL9	SEZ6	Seizure protein 6 homolog	3.5886	0.015641	P04003	C4BPA	C4b-binding protein alpha chain	0.46044	0.0097979
P12111	COL6A3	Collagen alpha-3(VI) chain	3.5532	0.01316	P35542	SAA4	Serum amyloid A-4 protein	0.46065	0.017537
P08253	MMP2	72 kDa type IV collagenase	3.5204	0.022491	Q9Y287	ITM2B	Integral membrane protein 2B	0.46193	0.0064721
P01042	KNG1	Kininogen-1	3.4817	0.017599	P01714	IGLV3-19	Immunoglobulin lambda variable 3-19	0.46608	0.041006
P25774	CTSS	Cathepsin S	3.4457	0.047448	P01619	IGKV3-20	Immunoglobulin kappa variable 3-20	0.47737	0.029604
P05543	SERPINA7	Thyroxine-binding globulin	3.4328	0.014531	O14791	APOL1	Apolipoprotein L1	0.47939	0.016176
P02765	AHSG	Alpha-2-HS-glycoprotein	3.4272	0.0042258	A0A075B6K5	IGLV3-9	Immunoglobulin lambda variable 3-9	0.4809	0.0097061
P01008	SERPINC1	Antithrombin-III	3.4123	0.010138	P27169	PON1	Serum paraoxonase/arylesterase 1	0.51483	0.031011
Q9NPR2	SEMA4B	Semaphorin-4B	3.4023	0.025324	Q02413	DSG1	Desmoglein-1	0.52702	0.038369
P10909	CLU	Clusterin	3.3715	0.010499	P22792	CPN2	Carboxypeptidase N subunit 2	0.52745	0.041004
Q6UXB8	PI16	Peptidase inhibitor 16	3.3682	0.036316	P02656	APOC3	Apolipoprotein C-III	0.53844	0.01267
P22304	IDS	Iduronate 2-sulfatase	3.231	0.030671	P01764	IGHV3-23	Immunoglobulin heavy variable 3-23	0.55239	0.01563
P26927	MST1	Hepatocyte growth factor-like protein	3.1978	0.026005
P05452	CLEC3B	Tetranectin	3.0749	0.014987
P13497	BMP1	Bone morphogenetic protein 1	3.0432	0.045155
P00746	CFD	Complement factor D	3.0305	0.0075404
O00533	CHL1	Neural cell adhesion molecule L1-like protein	3.0281	0.0098171
P11362	FGFR1	Fibroblast growth factor receptor 1	2.8472	0.03897
P23470	PTPRG	Receptor-type tyrosine-protein phosphatase gamma	2.8098	0.037174
P17936	IGFBP3	Insulin-like growth factor-binding protein 3	2.8088	0.022348
Q15113	PCOLCE	Procollagen C-endopeptidase enhancer 1	2.7902	0.041132
P04004	VTN	Vitronectin	2.7726	0.0037702
P08571	CD14	Monocyte differentiation antigen CD14	2.6949	0.04316
P13671	C6	Complement component C6	2.6545	0.015747
P00747	PLG	Plasminogen	2.6532	0.030975
Q96IY4	CPB2	Carboxypeptidase B2	2.6217	0.037032
Q02818	NUCB1	Nucleobindin-1	2.6098	0.0233
P05156	CFI	Complement factor I	2.568	0.0075962
P18065	IGFBP2	Insulin-like growth factor-binding protein 2	2.5193	0.029452
P27918	CFP	Properdin	2.5159	0.034157
Q16610	ECM1	Extracellular matrix protein 1	2.4869	0.01134
P12955	PEPD	Xaa-Pro dipeptidase	2.4759	0.033977
P49747	COMP	Cartilage oligomeric matrix protein	2.4536	0.012187
P08603	CFH	Complement factor H	2.4439	0.025995
Q04756	HGFAC	Hepatocyte growth factor activator	2.4321	0.016149
P01344	IGF2	Insulin-like growth factor II	2.3872	0.014012
P01033	TIMP1	Metalloproteinase inhibitor 1	2.3496	0.039243
Q9GZX9	TWSG1	Twisted gastrulation protein homolog 1	2.3206	0.02134
P14151	SELL	L-selectin	2.3143	0.01633
Q02985	CFHR3	Complement factor H-related protein 3	2.2671	0.032144
P00748	F12	Coagulation factor XII	2.2609	0.0071285
P08294	SOD3	Extracellular superoxide dismutase [Cu-Zn]	2.2192	0.028388
Q9UBR2	CTSZ	Cathepsin Z	2.1405	0.038533
P49908	SELENOP	Selenoprotein P	2.0973	0.035705
Q12860	CNTN1	Contactin-1	2.0873	0.046655
P35443	THBS4	Thrombospondin-4	2.0174	0.039004
P00751	CFB	Complement factor B	2.0041	0.048205
